# Supplementary material for: Solid-state aromatic nucleophilic fluorination: a rapid, practical, and environmentally friendly route to N-heteroaryl fluorides
Source: Royal Society of Chemistry journal article supplement (doi:10.1039/d4gc06362g), 2025-01-01

## **Solid-State Aromatic Nucleophilic Fluorination: A Rapid, Practical, and Environmentally Friendly Route to *N*-Heteroaryl Fluorides**

Koji Kubota,<sup>\*a,b</sup> Tetsu Makino,<sup>a</sup> Keisuke Kondo,<sup>a</sup> Tamae Seo,<sup>a</sup> Mingoo Jin<sup>b</sup> and Hajime Ito<sup>\*a,b</sup>

<sup>a</sup>*Division of Applied Chemistry, Graduate School of Engineering, Hokkaido University, Sapporo, Hokkaido, 060-8628, Japan.*

<sup>b</sup>*Institute for Chemical Reaction Design and Discovery (WPI-ICReDD), Hokkaido University, Sapporo, Hokkaido, 001-0021, Japan.*

e-mail: hajito@eng.hokudai.ac.jp, kbt@eng.hokudai.ac.jp

### **Table of Contents**

- 1. Chemicals and Instrumentation**
- 2. Substrate Preparation**
- 3. General Experimental Procedure**
- 4. Scaled-up Synthesis of 2r**
- 5. Thermography Observation for Reaction Temperature**
- 6. Calculation of E-factors**
- 7. Calculation of Reagents Cost**
- 8. Additional Optimization Study**
- 9. Comparison with Solution-based Protocols**
- 10. Purification Without Using Dichloromethane**
- 11. Characterization of Obtained Fluorinated Products**
- 12. References**
- 13. NMR spectra**

## 1. Chemicals and Instrumentation

Solvents and liquid additives were purchased from commercial suppliers and further dried over molecular sieve (MS 4Å). KF (spray-dried) was purchased from Wako Chemicals (166-13241). All mechanochemical reactions were carried out using grinding vessels in a Retsch MM400 mill. Both jars (1.5 mL, 5.0 mL, and 10 mL) and balls (7 mm, 10 mm, and 15 mm, diameter) are made of stainless (SUS400B and SUS420J2, respectively) (Figure S1 and S2). The heat gun Takagi, HG-1450B, with temperature control function was used (Figure S3). NMR spectra were recorded on JEOL JNM-ECZ400S and JNM-ECS400 spectrometers ( $^1\text{H}$ : 396 or 399 or 401 MHz,  $^{13}\text{C}$ : 99 or 100 or 101 MHz,  $^{19}\text{F}$ : 369 or 373 or 375 or 377 MHz). Tetramethylsilane ( $^1\text{H}$ ,  $\delta$ : 0.00),  $\text{CDCl}_3$  ( $^{13}\text{C}$ ,  $\delta$ : 77.0), and fluorobenzene ( $^{19}\text{F}$ ,  $\delta$ : -113.6) were employed as external standards, respectively. Multiplicity was recorded as follows: s = singlet, brs = broad singlet, d = doublet, t = triplet, q = quartet, quint = quintet, sept = septet, o = octet, m = multiplet. Recycle preparative gel permeation chromatography (GPC) was conducted with a JAI LC-9101 using  $\text{CHCl}_3$  as an eluent with JAIGEL-1H. Thermography was recorded with an NEC Avio Thermo GEAR G120. High-resolution mass spectra were recorded at the Global Facility Center, Hokkaido University.

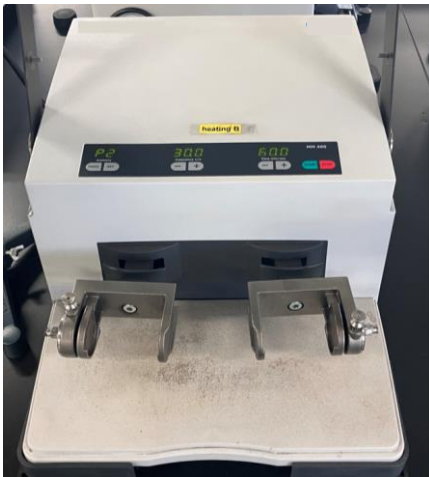

**Figure S1.** Retsch MM 400 used in this study.

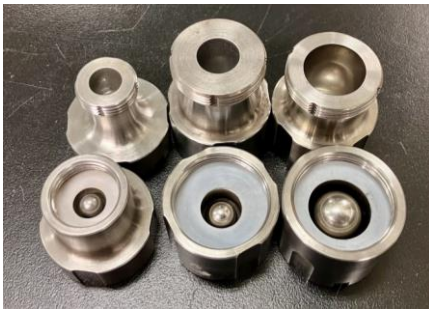

**Figure S2.** Stainless jars and balls used in this study.

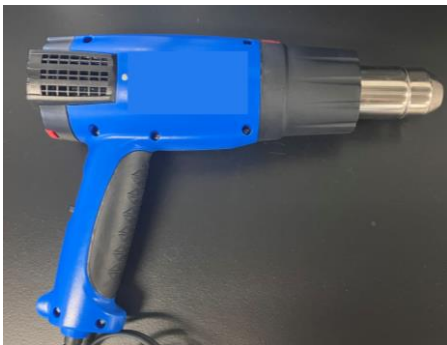

**Figure S3.** The temperature-controllable heat gun used in this study.

## 2. Substrate Preparation

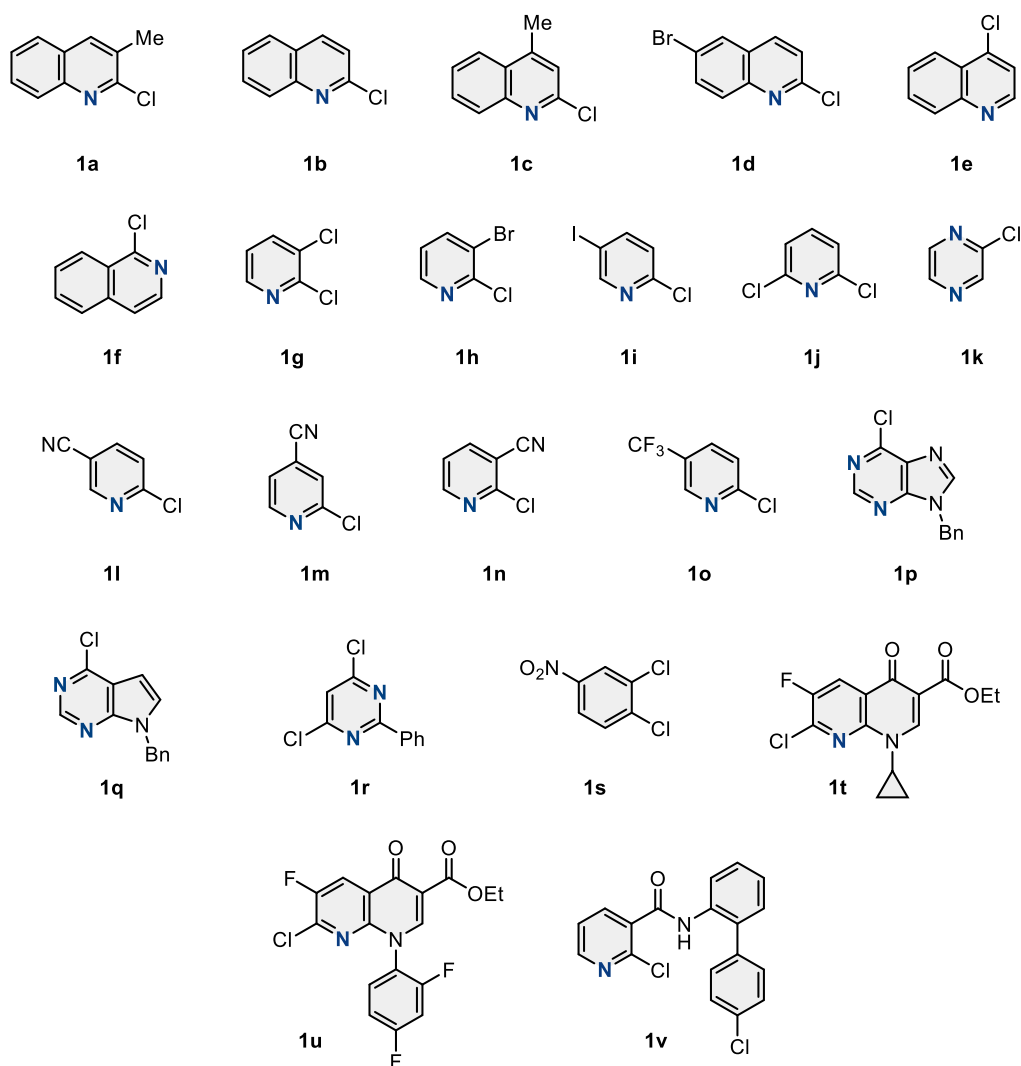

**1a–1o, 1r, 1s, 1u** and **1v** were purchased from commercial suppliers and used as received. **1p, 1q,** and **1t** were prepared through the following procedures.

### Preparation of 9-benzyl-6-chloro-9H-purine (**1p**).

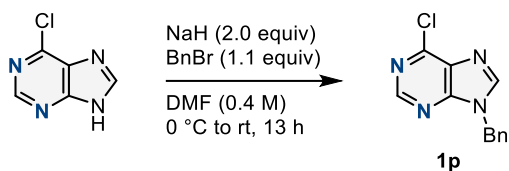

In a vacuum-dried reaction vial equipped with a magnetic stirring bar, 6-chloro-9H-purine (463.8 mg, 3.0 mmol) was dissolved in DMF (7.5 mL). NaH (60% dispersal in mineral oil, 358.5 mg, 6.5 mmol)

was added to the solution at 0 °C, and then stirred for 30 min. After 30 min, benzyl bromide (0.39 mL, 3.3 mmol) was added to the mixture. The mixture was allowed to warm to room temperature and stirred for 13 h. After the reaction, the mixture was quenched with water and extracted with 20% EtOAc/hexane three times. The organic layer was washed with brine and dried over anhydrous MgSO<sub>4</sub>. After filtration, the solvent was removed under vacuum, and the residue was purified by silica gel column chromatography (EtOAc/hexane, 30:70–40:60) to afford compound **1p** (250.9 mg, 1.0 mmol, 34%) as a white solid. <sup>1</sup>H and <sup>13</sup>C NMR were in agreement with the literature.<sup>1</sup>

<sup>1</sup>H NMR (396 MHz, CDCl<sub>3</sub>, δ): 5.47 (s, 2H), 7.30–7.41 (m, 5H), 8.11 (s, 1H), 8.80 (s, 1H). <sup>13</sup>C NMR (100 MHz, CDCl<sub>3</sub>, δ): 47.8 (CH<sub>2</sub>), 127.9 (CH), 128.8 (CH), 129.2 (CH), 131.5 (C), 134.5 (C), 144.9 (CH), 151.1 (C), 151.8 (C), 152.1 (CH). HRMS-ESI (m/z): [M+Na]<sup>+</sup> calcd for C<sub>12</sub>H<sub>9</sub>ClN<sub>4</sub>Na, 267.0408; found, 267.0405.

#### Preparation of 7-benzyl-4-chloro-7H-pyrrolo[2,3-d]pyrimidine (**1q**).

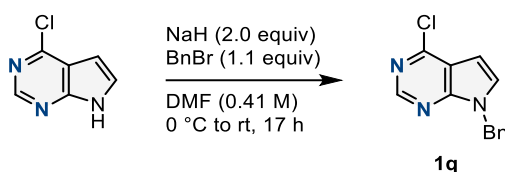

In a vacuum-dried reaction vial equipped with a magnetic stirring bar, 4-chloro-1H-pyrrolo[2,3-d]pyrimidine (500.3 mg, 3.3 mmol) was dissolved in DMF (8.0 mL). NaH (60% dispersal in mineral oil, 262.8 mg, 6.6 mmol) was added to the solution at 0 °C, and then stirred for 30 min. After 30 min, benzyl bromide (0.43 mL, 3.6 mmol) was added to the mixture. The mixture was allowed to warm to room temperature and stirred for 17 h. After the reaction, the mixture was quenched with water and extracted with 20% EtOAc/hexane three times. The organic layer was washed with brine and dried over anhydrous MgSO<sub>4</sub>. After filtration, the solvent was removed under vacuum, and the residue was purified by silica gel column chromatography (Et<sub>2</sub>O/hexane, 0:100–15:85) to afford compound **1q** (561.5 mg, 2.3 mmol, 71%) as a white solid. <sup>1</sup>H and <sup>13</sup>C NMR were in agreement with the literature.<sup>2</sup>

<sup>1</sup>H NMR (401 MHz, CDCl<sub>3</sub>, δ): 5.46 (s, 2H), 6.62 (d, *J* = 3.6 Hz, 1H), 7.21–7.23 (m, 3H), 7.30–7.36 (m, 3H), 8.68 (s, 1H). <sup>13</sup>C NMR (100 MHz, CDCl<sub>3</sub>, δ): 48.2 (CH<sub>2</sub>), 99.7 (CH), 117.2 (C), 127.4 (CH), 127.9 (CH), 128.7 (CH), 128.9 (CH), 136.0 (C), 150.6 (CH), 150.9 (C), 151.9 (C). HRMS-ESI (m/z): [M+H]<sup>+</sup> calcd for C<sub>13</sub>H<sub>11</sub>ClN<sub>3</sub>, 244.0636; found, 244.0635.

**Preparation of ethyl-7-chloro-6-fluoro-1-cyclopropyl-1,4-dihydro-4-oxo-1,8-naphthyridine-3-carboxylate (1t).**

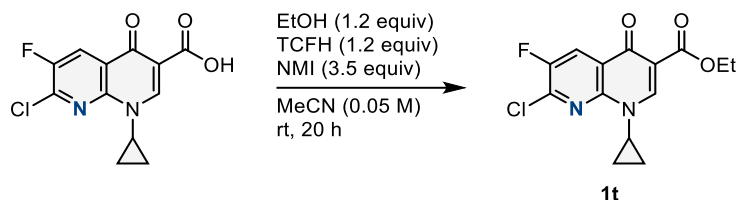

In a 100 mL two-necked round-bottomed flask equipped with a magnetic stirring bar, 7-chloro-1-cyclopropyl-6-fluoro-1,4-dihydro-4-oxo-1,8-naphthyridine-3-carboxylic acid (565.4 mg, 2.0 mmol) was dissolved in MeCN (38 mL). EtOH (0.14 mL, 2.4 mmol), *N*-methylimidazole (NMI) (0.56 mL, 7.0 mmol), and chloro-*N,N,N',N'*-tetramethylformamidinium hexafluorophosphate (TCFH) (673.9 mg, 2.4 mmol) were added to the solution, then stirred at room temperature for 20 h. After the reaction, the solution was diluted with water and extracted with CH<sub>2</sub>Cl<sub>2</sub> three times. The organic layer was washed with brine and dried over MgSO<sub>4</sub>. After filtration, the solvent was removed under vacuum. The residue was washed with water to remove tetramethylurea and purified by silica gel column chromatography (EtOAc/hexane, 20:80–100:0) to afford compound **1t** (533.4 mg, 1.7 mmol, 86%) as a white powder. <sup>1</sup>H NMR was in agreement with the literature.<sup>3</sup>

<sup>1</sup>H NMR (401 MHz, CDCl<sub>3</sub>, δ): 1.04–1.09 (m, 2H), 1.29–1.36 (m, 2H), 1.41 (t, *J* = 7.2 Hz, 3H), 3.66 (tt, *J* = 3.2, 4.0 Hz, 1H), 4.41 (q, *J* = 7.2 Hz, 2H), 8.44 (d, *J* = 7.2 Hz, 1H), 8.66 (s, 1H). <sup>13</sup>C NMR (100 MHz, CDCl<sub>3</sub>, δ): 7.5 (CH<sub>2</sub>), 14.2 (CH<sub>3</sub>), 34.3 (CH), 61.0 (CH<sub>2</sub>), 111.8 (C), 122.8 (d, *J* = 21.0 Hz, CH), 123.6 (d, *J* = 2.8 Hz, C), 142.2 (d, *J* = 21.9 Hz, C), 145.7 (d, *J* = 1.9 Hz, C), 148.8 (CH), 152.4 (d, *J* = 261.3 Hz, C), 164.5 (C), 173.0 (C). HRMS-EI (*m/z*): [*M*]<sup>+</sup> calcd for C<sub>14</sub>H<sub>12</sub>ClFN<sub>2</sub>O<sub>3</sub>, 310.0515; found, 310.0516.

### 3. General Experimental Procedure

#### 1) Mechanochemical S<sub>N</sub>Ar fluorination

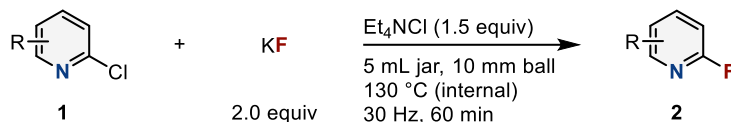

**Procedure A:** Heteroaryl chloride **1** (0.50 mmol), KF (1.0 mmol, 2.0 equiv), and Et<sub>4</sub>NCl (0.75 mmol, 1.5 equiv) were placed in a ball milling vessel (stainless, 5 mL) loaded with one grinding ball (stainless, diameter: 10 mm). After the vessel was closed in air without purging with inert gas, the vessel was placed in the ball mill (Retsch MM400, 60 min at 30 Hz) and a heat gun (preset temperature at 250 °C). After 60 min, the jar was cooled rapidly with cold water and opened. The mixture was passed through a short silica gel column eluting with 50% EtOAc/CH<sub>2</sub>Cl<sub>2</sub>. The crude mixture was purified by flash column chromatography (SiO<sub>2</sub>, Et<sub>2</sub>O/hexane, typically 0:100–5:95) to give the corresponding fluorinated product **2**.

**Procedure B:** Heteroaryl chloride **1** (0.50 mmol), KF (1.0 mmol, 2.0 equiv), and Et<sub>4</sub>NCl (0.75 mmol, 1.5 equiv) were placed in a ball milling vessel (stainless, 1.5 mL) loaded with one grinding ball (stainless, diameter: 7 mm). After the vessel was closed in air without purging with inert gas, the vessel was placed in the ball mill (Retsch MM400, 30–60 min at 30 Hz) and a heat gun (preset temperature at 250 °C). After 30–60 min, the jar was then cooled and opened. The mixture was passed through a short silica gel column eluting with 50% EtOAc/CH<sub>2</sub>Cl<sub>2</sub>. The crude mixture was purified by flash column chromatography (SiO<sub>2</sub>, Et<sub>2</sub>O/hexane, typically 0:100–20:80) to give the corresponding fluorinated product **2**.

#### 2) S<sub>N</sub>Ar fluorination reaction under neat conditions

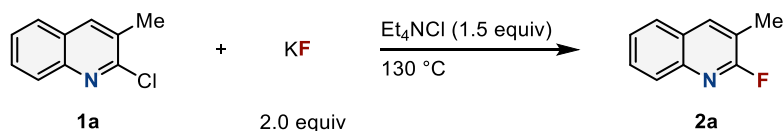

In a vacuum-dried test tube equipped with a magnetic stirring bar, 2-chloro-3-methylquinoline **1a** (0.50 mmol), KF (1.0 mmol, 2.0 equiv) and Et<sub>4</sub>NCl (0.75 mmol, 1.5 equiv) were added. The mixture was warmed to 130 °C and stirred for 60 min or 24 h. After the reaction, the mixture was cooled to room temperature and diluted with water, then extracted with Et<sub>2</sub>O three times. The organic layer was washed with brine and dried over anhydrous MgSO<sub>4</sub>. The yield was determined by <sup>19</sup>F NMR analysis with fluorobenzene as an internal standard.

### 3) Mechanochemical S<sub>N</sub>Ar fluorination reaction using ammonium fluoride

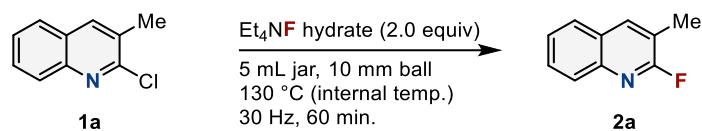

2-Chloro-3-methylquinoline **1a** (88.6 mg, 0.50 mmol) and Et<sub>4</sub>NF hydrate (150 mg, 1.0 mmol, 2.0 equiv based on anhydrous) were placed in a ball milling vessel (stainless, 5 mL) loaded with one grinding ball (stainless, diameter: 10 mm) in a glovebox. After the vessel was closed purging with inert gas, the vessel was placed in the ball mill (Retsch MM400, 60 min at 30 Hz) and heat gun (preset temperature at 250 °C). After 60 min, the jar was then cooled rapidly with cold water and opened. The mixture was passed through a short silica gel column eluting with 50% EtOAc/CH<sub>2</sub>Cl<sub>2</sub>. The crude mixture was analyzed using <sup>19</sup>F NMR with fluorobenzene (15.5 mg) as an internal standard to obtain a NMR yield of **2a** in 61% yield.



#### 4. Scaled-up Synthesis of **2r**

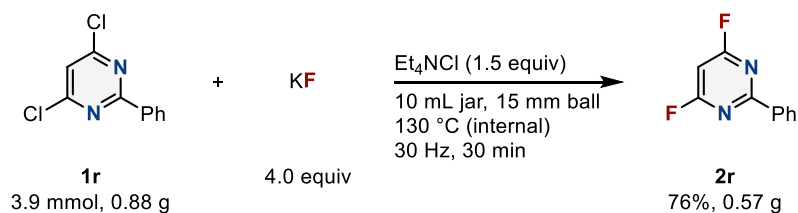

Fencloirim **1r** (0.877 g, 3.9 mmol), KF (0.907 g, 15.6 mmol, 4.0 equiv) and Et<sub>4</sub>NCl (0.970 g, 5.85 mmol, 1.5 equiv) were placed in a ball milling vessel (stainless, 10 mL) loaded with grinding ball (stainless, diameter: 15 mm). After the vessel was closed in air without purging with inert gas, the vessel was placed in the ball mill (Retsch MM400, 30 min at 30 Hz) and a heat gun (preset temperature at 250 °C). After 30 min, the jar was then cooled rapidly with cold water and opened. The mixture was diluted with water and then extracted with EtOAc three times. The organic layer was combined and dried over anhydrous MgSO<sub>4</sub>. After filtration, the solvent was removed under vacuum, and the residue was purified by silica gel column chromatography (Et<sub>2</sub>O/hexane, 0:100–2:98) to afford compound **2r** (569.6 mg, 2.96 mmol, 76%) as a white solid.

## 5. Thermography Observation for Reaction Temperature

The temperature inside the milling jar after the mechanochemical  $S_NAr$  fluorination reactions were confirmed by observation with a thermography camera immediately after opening the milling jar. When the pre-set temperature of the heat gun was 250 °C for a 5 mL stainless jar with a 10 mm ball (30 Hz, 60 min), the internal temperature was determined to be 129.5 °C (Figure S4). Similarly, for a 10 mL stainless jar with a 15 mm ball (30 Hz, 30 min), the internal temperature was 131.2 °C (Figure S5). For a 1.5 mL stainless jar with a 7 mm ball (30 Hz, 30 min), the internal temperature was 125.4 °C (Figure S6).

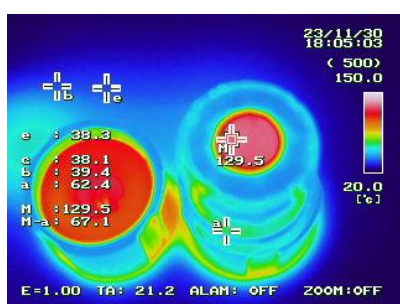

**Figure S4.** Thermography image inside the milling jar (5 mL) after grinding for 60 min at 30 Hz.

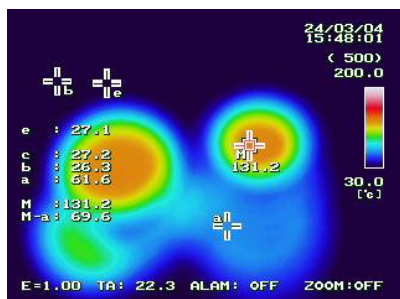

**Figure S5.** Thermography image inside the milling jar (10 mL) after grinding for 30 min at 30 Hz.

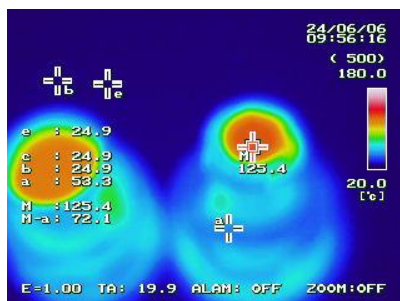

**Figure S6.** Thermography image inside the milling jar (1.5 mL) after grinding for 30 min at 30 Hz.

## 6. Calculation of E-factors

The E-factors were calculated for the present solid-state conditions and compared to those of Bland's and Sanford's conditions following literature procedures.<sup>4,5</sup>

### < Our solid-state fluorination conditions >

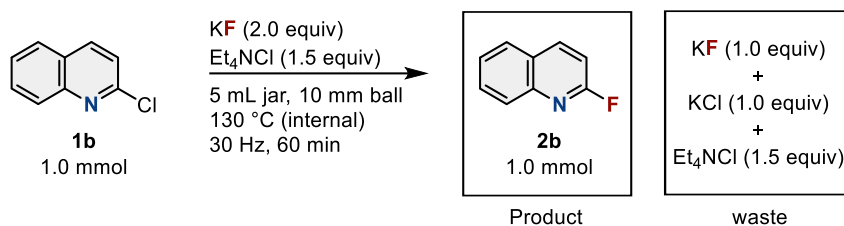

**Table S1.** E-factor of our solid-state fluorination conditions.

| this work           | Mw     | mmol | mg      |
|---------------------|--------|------|---------|
| <b>product</b>      |        |      |         |
| <b>2b</b>           | 147.15 | 1.0  | 147.15  |
| <b>waste</b>        |        |      |         |
| KF                  | 58.1   | 1.0  | 58.1    |
| KCl                 | 74.55  | 1.0  | 74.55   |
| Et <sub>4</sub> NCl | 165.71 | 1.5  | 248.565 |
| total               |        |      | 381.215 |
| E-factor            |        |      | 2.6     |

< **Bland's fluorination conditions**<sup>4</sup> >

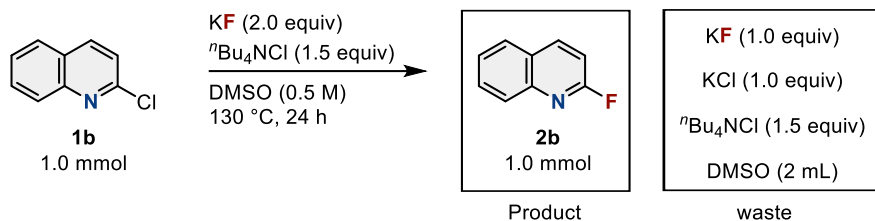

**Table S2.** E-factor of Bland's fluorination conditions.

| Bland, 2014                      | Mw     | mmol | mg      |
|----------------------------------|--------|------|---------|
| <b>product</b>                   |        |      |         |
| <b>2b</b>                        | 147.15 | 1.0  | 147.15  |
| <b>waste</b>                     |        |      |         |
| KF                               | 58.1   | 1.0  | 58.1    |
| KCl                              | 74.55  | 1.0  | 74.55   |
| <sup>n</sup> Bu <sub>4</sub> NCl | 277.92 | 1.5  | 416.88  |
| DMSO                             |        |      | 2200    |
| total                            |        |      | 2749.52 |
| E-factor                         |        |      | 18.7    |

< **Sanford's fluorination conditions**<sup>5</sup> >

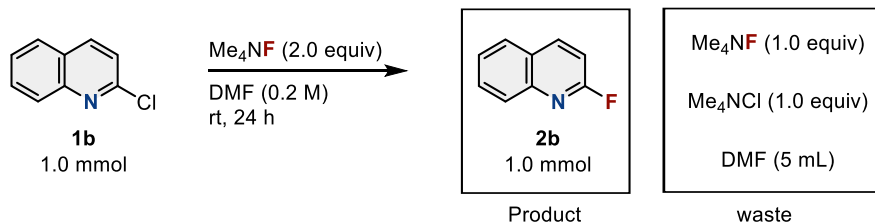

**Table S3.** E-factor of Sanford's fluorination conditions.

| Sanford, 2015       | Mw     | mmol | mg      |
|---------------------|--------|------|---------|
| <b>product</b>      |        |      |         |
| <b>2b</b>           | 147.15 | 1.0  | 147.15  |
| <b>waste</b>        |        |      |         |
| Me <sub>4</sub> NF  | 93.14  | 1.0  | 93.14   |
| Me <sub>4</sub> NCl | 109.6  | 1.0  | 109.6   |
| DMF                 |        |      | 4720    |
| total               |        |      | 4922.74 |
| E-factor            |        |      | 33.5    |

We recalculated the E-factor for the reaction of **1b**, taking into account the purification step. As shown below, the E-factor is 3019.92. We also calculated the E-factor for the large-scale mechanochemical synthesis of **2r** and its purification, which is 1252.73. Importantly, it should be noted here that our research aims to reduce the quantity of reaction solvents, and the current workup/purification procedure is not optimal from a sustainability perspective. Although this was not the focus of this study, it must be considered when developing industrial mechanochemical protocols.

< E-factor for the reaction of **1b** considering the purification process >

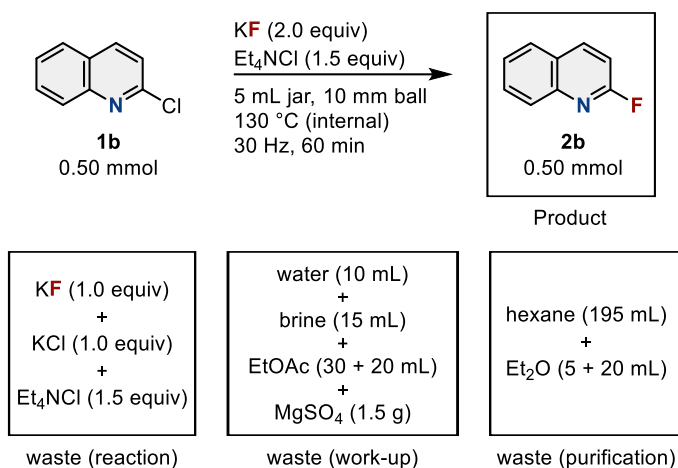

**Table S4.** E-factor of our solid-state fluorination conditions considering the purification step.

| this work                   | Mw     | mmol | g       |
|-----------------------------|--------|------|---------|
| <b>product</b>              |        |      |         |
| <b>2b</b>                   | 147.15 | 0.50 | 0.074   |
| <b>waste (Reaction)</b>     |        |      |         |
| KF                          | 58.10  | 0.50 | 0.029   |
| KCl                         | 74.55  | 0.50 | 0.037   |
| Et <sub>4</sub> NCl         | 165.71 | 0.75 | 0.124   |
| <b>waste (work-up)</b>      |        |      |         |
| water                       |        |      | 10      |
| brine                       |        |      | 18      |
| EtOAc                       |        |      | 45      |
| MgSO <sub>4</sub>           |        |      | 1.5     |
| <b>waste (purification)</b> |        |      |         |
| hexane                      |        |      | 130     |
| Et <sub>2</sub> O           |        |      | 17.5    |
| <b>total waste</b>          |        |      | 222.191 |
| E-factor (total)            |        |      | 3019.92 |

< E-factor for the reaction of 1r considering the purification process >

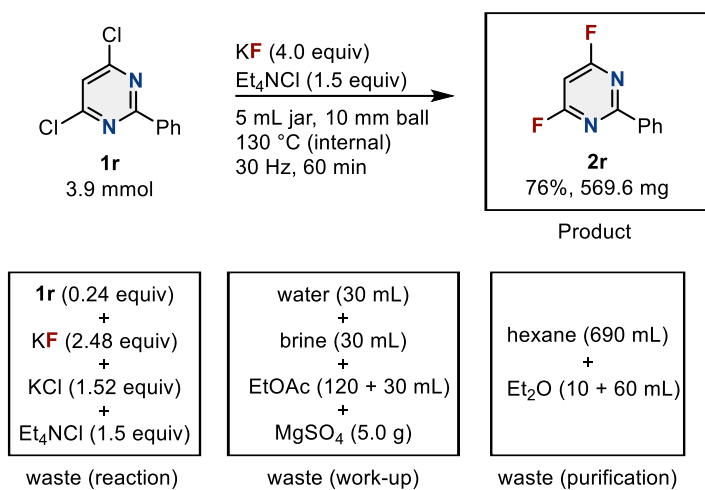

**Table S5.** E-factor of our solid-state fluorination conditions on a gram scale considering the purification step.

| this work                   | Mw     | mmol | g       |
|-----------------------------|--------|------|---------|
| <b>product</b>              |        |      |         |
| 2r                          | 192.17 | 2.96 | 0.569   |
| <b>waste (Reaction)</b>     |        |      |         |
| 1r                          | 225.07 | 0.94 | 0.211   |
| KF                          | 58.10  | 9.67 | 0.562   |
| KCl                         | 74.55  | 5.93 | 0.442   |
| Et <sub>4</sub> NCl         | 165.71 | 5.85 | 0.969   |
| <b>waste (work-up)</b>      |        |      |         |
| water                       |        |      | 30      |
| brine                       |        |      | 36      |
| EtOAc                       |        |      | 135     |
| MgSO <sub>4</sub>           |        |      | 5       |
| <b>waste (purification)</b> |        |      |         |
| hexane                      |        |      | 455.4   |
| Et <sub>2</sub> O           |        |      | 49      |
| <b>total waste</b>          |        |      | 712.584 |
| E-factor (reaction)         |        |      | 3.839   |
| E-factor (total)            |        |      | 1252.73 |

## 7. Calculation of Reagents Cost

The reagent costs were calculated on a 1.0 mol scale reaction under the present solid-state conditions and compared to those of Bland's and Sanford's conditions.<sup>4,5</sup> Retail prices are for July 2024. The results showed that our method is much less inexpensive S<sub>N</sub>Ar fluorination system.

### < Our solid-state fluorination conditions >

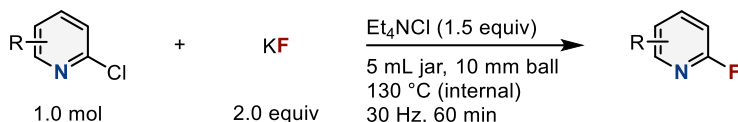

**Table S6. Total reagents cost of our solid-state fluorination conditions.**

| This work                        | amount (mol or L) | cost (JPY)          |
|----------------------------------|-------------------|---------------------|
| KF (Wako, 166-13241)             | 2                 | 2092                |
| Et <sub>4</sub> NCl (TCI, T0095) | 1.5               | 12279               |
| Total cost                       |                   | 14371 (ca. US \$89) |

### < Bland's fluorination conditions<sup>4</sup> >

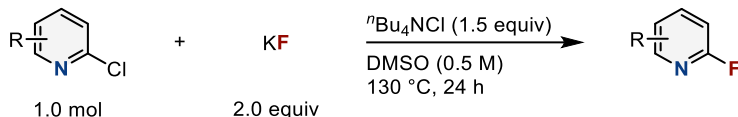

**Table S7. Total reagents cost of Bland's conditions.**

| Bland, 2014                                   | amount (mol or L) | cost (JPY)            |
|-----------------------------------------------|-------------------|-----------------------|
| KF (Wako, 166-13241)                          | 2                 | 2092                  |
| <sup>n</sup> Bu <sub>4</sub> NCl (TCI, T0055) | 1.5               | 121729                |
| DMSO (KANTO, 10380-05)                        | 2                 | 34000                 |
| Total cost                                    |                   | 157821 (ca. US \$977) |

< Sanford's fluorination conditions<sup>5</sup> >

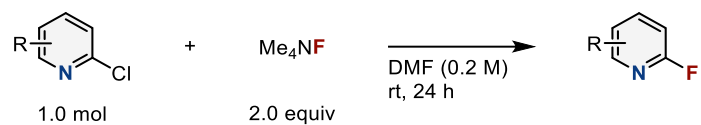

**Table S8. Total reagents cost of Sanford's conditions.**

| Sanford, 2015                              | amount (mol or L) | cost (JPY)               |
|--------------------------------------------|-------------------|--------------------------|
| Me <sub>4</sub> NF (Sigma-Aldrich, 459135) | 2                 | 1818093                  |
| DMF (KANTO, 11339-05)                      | 5                 | 51000                    |
| Total cost                                 |                   | 1869093 (ca. US \$11571) |



## 8. Additional Optimization Study

2-Chloro-3-methylquinoline (**1a**, 0.50 mmol), KF (1.0–2.0 equiv), and Et<sub>4</sub>NCl (0–1.5 equiv) were placed in a ball-milling vessel (stainless steel, 5 mL) loaded with one grinding ball (stainless steel, diameter: 10 mm). After the vessel was closed in air without purging with inert gas, the vessel was placed in the ball mill (Retsch MM400, 60 min, 30 Hz) and a heat gun (preset temperature: 250 °C). After 60 min, the jar was cooled rapidly with cold water and opened. The mixture was passed through a short column of silica gel using EtOAc/CH<sub>2</sub>Cl<sub>2</sub> (1/1, v/v). The crude mixture was analyzed using <sup>19</sup>F NMR spectroscopy with fluorobenzene as the internal standard. When reducing the amount of KF and Et<sub>4</sub>NCl, the yield of **2a** decreased. The use of KF (2.0 equiv) and Et<sub>4</sub>NCl (1.5 equiv) is required for an efficient fluorination.

**Table S9.** Additional optimization study.

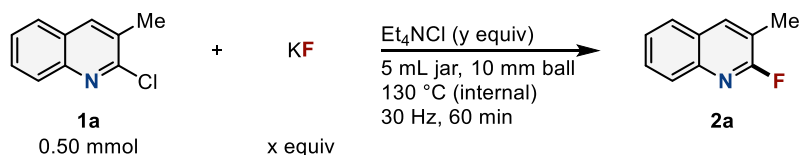

| Entry | KF (x equiv) | Et <sub>4</sub> NCl (y equiv) | yield of <b>2a</b> (%) <sup>a</sup> |
|-------|--------------|-------------------------------|-------------------------------------|
| 1     | 2.0          | 1.5                           | >99                                 |
| 2     | 1.5          | 1.5                           | 70                                  |
| 3     | 1.0          | 1.5                           | 27                                  |
| 4     | 2.0          | 0.5                           | 79                                  |
| 5     | 2.0          | 0.1                           | 29                                  |
| 6     | 2.0          | 0                             | n.d.                                |

<sup>a</sup><sup>19</sup>F NMR yields determined with fluorobenzene as an internal standard.

## 9. Comparison with Solution-based Protocols

We compared the yields of the present mechanochemical conditions, and the solution-based conditions reported by Sanford, which is one of the most practical  $S_NAr$  fluorination protocols.<sup>6</sup> As shown below, in these ten examples, there are no significant differences in yield between mechanochemical (condition A) and solution-based (condition B) reactions. For **2c** and **2i**, the mechanochemical protocol is much better than the solution-based method.

**Table S10.** Comparison with solution-based protocols.

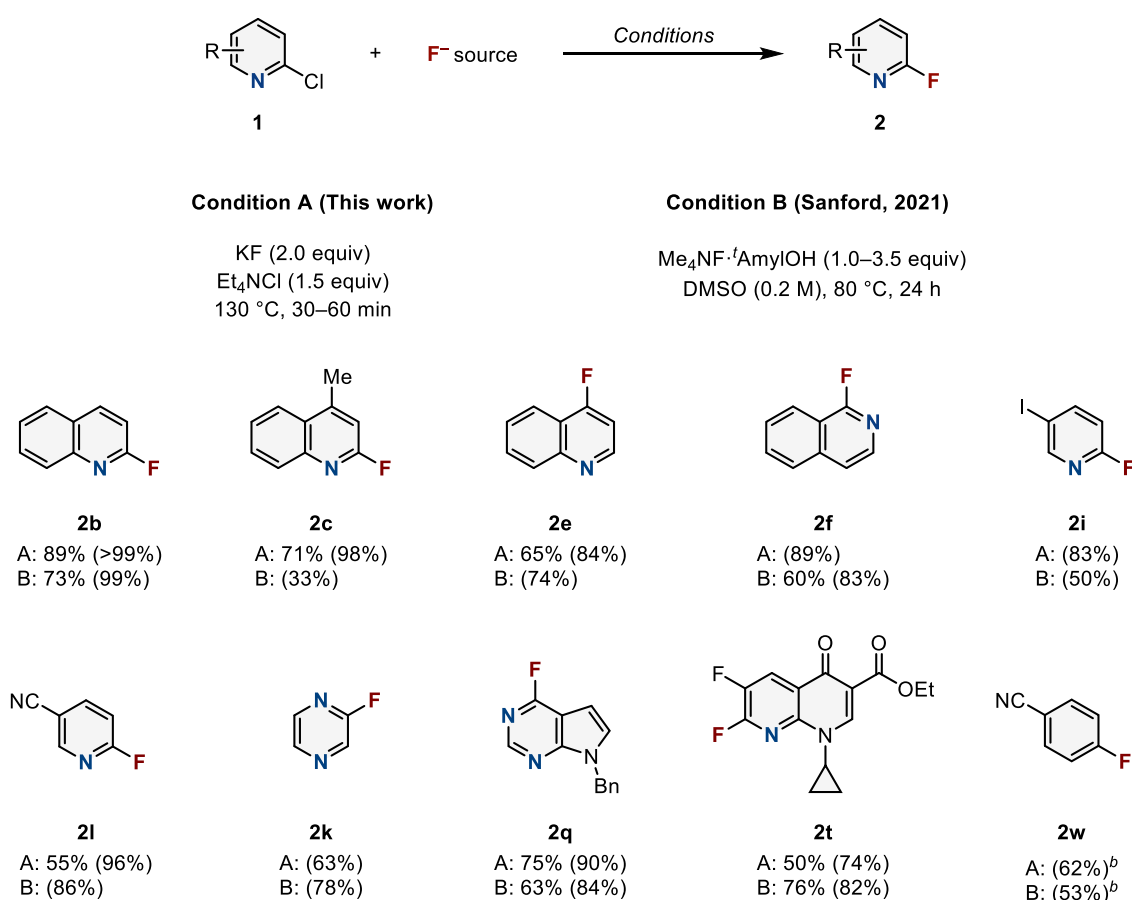

<sup>a</sup>Isolated yields. <sup>19</sup>F NMR yields are given in parentheses. <sup>b</sup>From nitroarene

## 10. Purification Without Using Dichloromethane

To enhance the sustainability of this mechanochemical protocol, we conducted the purification process without using dichloromethane. We used EtOAc for the purification step in reactions involving five different substrates. The results showed that the yields of these products were similar to those of the reactions using dichloromethane ( $\pm 5\%$ ), suggesting that dichloromethane can be replaced by EtOAc in the purification step.

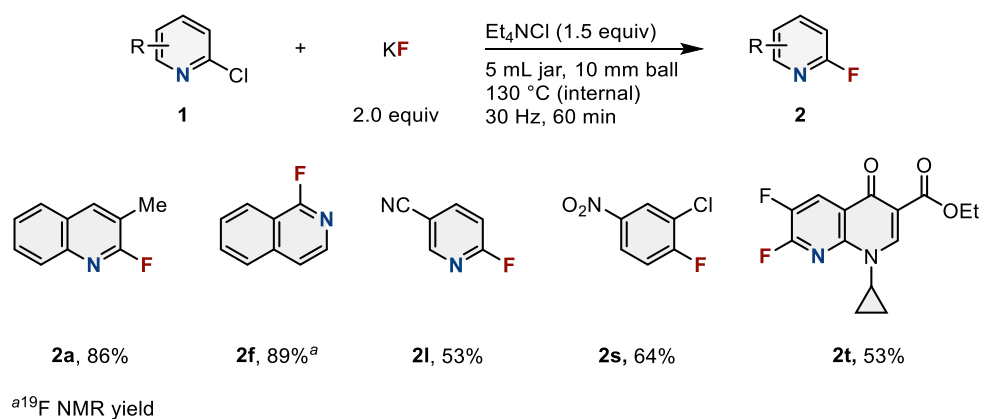

**Procedure C (for 1a and 1t):** Heteroaryl chloride **1** (0.50 mmol),  $\text{KF}$  (1.0 mmol, 2.0 equiv), and  $\text{Et}_4\text{NCl}$  (0.75 mmol, 1.5 equiv) were placed in a ball-milling vessel (stainless steel, 5 mL) loaded with one grinding ball (stainless steel, diameter: 10 mm). After the vessel was closed in air without purging with inert gas, the vessel was placed in the ball mill (Retsch MM400, 60 min, 30 Hz) and a heat gun (preset temperature: 250 °C). After 60 min, the jar was cooled rapidly with cold water and opened. The mixture was transferred to a separatory funnel with EtOAc (10 mL) and water (10 mL) and then extracted with EtOAc ( $3 \times 10$  mL). The combined organic layer was washed with brine (15 mL) and dried over anhydrous  $\text{MgSO}_4$ . After filtration, the solvent was removed from the filtrate under reduced pressure. The crude mixture was purified by flash column chromatography ( $\text{SiO}_2$ ,  $\text{Et}_2\text{O}$ /hexane) to give the corresponding fluorinated product (**2**).

**Procedure D (for 1f):** **1f** (0.50 mmol),  $\text{KF}$  (1.0 mmol, 2.0 equiv), and  $\text{Et}_4\text{NCl}$  (0.75 mmol, 1.5 equiv) were placed in a ball milling vessel (stainless steel, 5 mL) loaded with one grinding ball (stainless steel, diameter: 10 mm). After the vessel was closed in air without purging with inert gas, the vessel was placed in the ball mill (Retsch MM400, 60 min, 30 Hz) and a heat gun (preset temperature: 250 °C). After 60 min, the jar was cooled rapidly with cold water and opened. The mixture was transferred to a separatory funnel with EtOAc (10 mL) and water (10 mL), then extracted with EtOAc ( $3 \times 10$  mL). The combined organic layer was washed with brine (15 mL) and dried over anhydrous  $\text{MgSO}_4$ . After

filtration, the solvent was removed from the filtrate under reduced pressure. The resulting crude mixture was analyzed by  $^{19}\text{F}$  NMR spectroscopy with fluorobenzene as the internal standard.

**Procedure E (for **1l** and **1s**):** Heteroaryl chloride **1** (0.50 mmol), KF (1.0 mmol, 2.0 equiv), and  $\text{Et}_4\text{NCl}$  (0.75 mmol, 1.5 equiv) were placed in a ball-milling vessel (stainless steel, 1.5 mL) loaded with one grinding ball (stainless steel, diameter: 7 mm). After the vessel was closed in air without purging with inert gas, the vessel was placed in the ball mill (Retsch MM400, 30 or 45 min, 30 Hz) and a heat gun (preset temperature: 250 °C). After 30 or 45 min, the jar was then cooled and opened. The mixture was transferred to a separatory funnel with EtOAc (10 mL) and water (10 mL), and extracted with EtOAc ( $3 \times 10$  mL). The combined organic layers were washed with brine (15 mL) and dried over anhydrous  $\text{MgSO}_4$ . After filtration, the solvent was removed from the filtrate under reduced pressure. The crude mixture was purified by flash column chromatography ( $\text{SiO}_2$ ,  $\text{Et}_2\text{O}$ /hexane) to give the corresponding fluorinated product (**2**).

## 11. Characterization of Obtained Fluorinated Products

### 2-Fluoro-3-methylquinoline (2a).

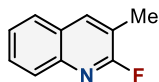

2a

The reaction was performed according to the general procedure A. The reaction was carried out with 88.9 mg (0.50 mmol) of **1a**. The resulting crude mixture was analyzed using  $^{19}\text{F}$  NMR with fluorobenzene (15.3 mg) as an internal standard to obtain the NMR yield of **2a** in >99% yield. Product **2a** was obtained as a white solid (68.8 mg, 0.43 mmol, 85% yield) after purification by silica-gel column chromatography ( $\text{SiO}_2$ ,  $\text{Et}_2\text{O}$ /hexane, 0:100–5:95).

$^1\text{H}$  NMR (396 MHz,  $\text{CDCl}_3$ ,  $\delta$ ): 2.45 (s, 3H), 7.48–7.54 (m, 1H), 7.63–7.70 (m, 1H), 7.77 (d,  $J = 7.9$  Hz, 1H), 7.91 (d,  $J = 8.7$  Hz, 1H), 8.02 (d,  $J = 9.9$  Hz, 1H).  $^{13}\text{C}$  NMR (100 MHz,  $\text{CDCl}_3$ ,  $\delta$ ): 15.1 ( $\text{CH}_3$ ), 120.0 (d,  $J = 36.2$  Hz, C), 125.9 (d,  $J = 2.0$  Hz, CH), 126.6 (CH), 127.3 (d,  $J = 2.0$  Hz, C), 127.6 (CH), 129.3 (CH), 140.4 (d,  $J = 7.6$  Hz, CH), 144.2 (d,  $J = 17.2$  Hz, C), 160.4 (d,  $J = 243.2$  Hz, C).  $^{19}\text{F}$  NMR (373 MHz,  $\text{CDCl}_3$ ,  $\delta$ ): –66.5 (s). HRMS-APCI ( $m/z$ ):  $[\text{M}+\text{H}]^+$  calcd for  $\text{C}_{10}\text{H}_9\text{FN}$ , 161.0714; found, 161.0708.

### 2-Fluoroquinoline (2b).

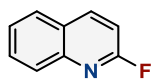

2b

The reaction was performed according to the general procedure A. The reaction was carried out with 81.8 mg (0.50 mmol) of **1b**. The resulting crude mixture was analyzed using  $^{19}\text{F}$  NMR with fluorobenzene (14.6 mg) as an internal standard to obtain the NMR yield of **2b** in >99% yield. Product **2b** was obtained as a colorless oil (65.3 mg, 0.44 mmol, 89% yield) after purification by silica-gel column chromatography ( $\text{SiO}_2$ ,  $\text{Et}_2\text{O}$ /hexane, 0:100–10:90) and recycling preparative GPC.  $^1\text{H}$ ,  $^{13}\text{C}$ , and  $^{19}\text{F}$  NMR were in agreement with the literature.<sup>6</sup>

The reaction was carried out with 104.2 mg (0.50 mmol) of 2-bromoquinoline (**1b'**). The resulting crude mixture was analyzed using  $^{19}\text{F}$  NMR with fluorobenzene (15.2 mg) as an internal standard to obtain the NMR yield of **2b** in >99% yield.  $^{19}\text{F}$  NMR was in agreement with the literature.<sup>6</sup>  $^1\text{H}$  NMR (401 MHz,  $\text{CDCl}_3$ ,  $\delta$ ): 7.09 (dd,  $J = 2.8, 8.8$  Hz, 1H), 7.55 (t,  $J = 7.6$  Hz, 1H), 7.74 (t,  $J = 7.4$  Hz, 1H), 7.85 (d,  $J = 8.0$  Hz, 1H), 7.96 (d,  $J = 8.8$  Hz, 1H), 8.26 (t,  $J = 8.6$  Hz, 1H).  $^{13}\text{C}$  NMR (100 MHz,  $\text{CDCl}_3$ ,  $\delta$ ): 110.0 (d,  $J = 42.2$  Hz, CH), 126.1 (d,  $J = 2.9$  Hz, CH), 126.8 (d,  $J = 1.9$  Hz, C), 127.5 (CH), 128.0 (CH), 130.6 (CH), 141.9 (d,  $J = 10.5$  Hz, CH), 145.7 (d,  $J = 16.3$  Hz, C), 161.1 (d,  $J = 241.6$  Hz, C).  $^{19}\text{F}$  NMR (377 MHz,  $\text{CDCl}_3$ ,  $\delta$ ): –62.2 (s). HRMS-EI ( $m/z$ ):  $[\text{M}]^+$  calcd for  $\text{C}_9\text{H}_6\text{FN}$ ,

147.0479; found, 147.0479.

### 2-Fluoro-4-methylquinoline (2c).

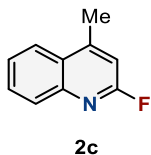

The reaction was performed according to the general procedure A. The reaction was carried out with 88.8 mg (0.50 mmol) of **1c**. The resulting crude mixture was analyzed by  $^{19}\text{F}$  NMR with fluorobenzene (15.2 mg) as an internal standard to obtain the NMR yield of **2c** in 98% yield. Product **2c** was obtained as a colorless oil (57.6 mg, 0.36 mmol, 71% yield, isolated along with approximately 6% of starting material) after purification by silica-gel column chromatography ( $\text{SiO}_2$ ,  $\text{Et}_2\text{O}$ /hexane, 0:100–5:95).  $^1\text{H}$  and  $^{19}\text{F}$  NMR were in agreement with the literature.<sup>7</sup>

$^1\text{H}$  NMR (396 MHz,  $\text{CDCl}_3$ ,  $\delta$ ): 2.73 (s, 3H), 6.93 (s, 1H), 7.52–7.57 (m, 1H), 7.72 (t,  $J = 7.5$  Hz, 1H), 7.96 (t,  $J = 9.3$  Hz, 2H).  $^{13}\text{C}$  NMR (100 MHz,  $\text{CDCl}_3$ ,  $\delta$ ): 18.9 (d,  $J = 2.9$  Hz,  $\text{CH}_3$ ), 109.9 (d,  $J = 41.9$  Hz, CH), 123.7 (CH), 125.73 (CH), 125.75 (C), 128.5 (CH), 130.2 (CH), 145.5 (d,  $J = 17.2$  Hz, C), 151.0 (d,  $J = 10.0$  Hz, C), 160.9 (d,  $J = 241.3$  Hz, C).  $^{19}\text{F}$  NMR (377 MHz,  $\text{CDCl}_3$ ,  $\delta$ ): –63.5 (s). HRMS-EI (m/z):  $[\text{M}]^+$  calcd for  $\text{C}_{10}\text{H}_8\text{FN}$ , 161.0635; found, 161.0636.

### 6-Bromo-2-fluoroquinoline (2d).

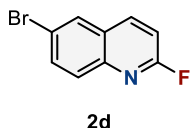

The reaction was performed according to the general procedure A. The reaction was carried out with 121.9 mg (0.50 mmol) of **1d**. The resulting crude mixture was analyzed by  $^{19}\text{F}$  NMR with fluorobenzene (15.1 mg) as an internal standard to obtain the NMR yield of **2d** in 88% yield. Product **2d** was obtained as a white solid (80.2 mg, 0.35 mmol, 71% yield) after purification by silica-gel column chromatography ( $\text{SiO}_2$ ,  $\text{Et}_2\text{O}$ /hexane, 0:100–5:95).  $^1\text{H}$ ,  $^{13}\text{C}$ , and  $^{19}\text{F}$  NMR were in agreement with the literature.<sup>6</sup>

$^1\text{H}$  NMR (396 MHz,  $\text{CDCl}_3$ ,  $\delta$ ): 7.13 (dd,  $J = 2.8, 9.1$  Hz, 1H), 7.79–7.85 (m, 2H), 8.02 (d,  $J = 2.0$  Hz, 1H), 8.18 (t,  $J = 8.5$  Hz, 1H).  $^{13}\text{C}$  NMR (100 MHz,  $\text{CDCl}_3$ ,  $\delta$ ): 111.0 (d,  $J = 42.0$  Hz, CH), 119.8 (d,  $J = 2.9$  Hz, C), 127.8 (d,  $J = 1.9$  Hz, C), 129.5 (CH), 129.6 (d,  $J = 16.2$  Hz, CH), 133.9 (CH), 140.9 (d,  $J = 9.6$  Hz, CH), 144.3 (d,  $J = 17.2$  Hz, C), 161.1 (d,  $J = 244.1$  Hz, C).  $^{19}\text{F}$  NMR (373 MHz,  $\text{CDCl}_3$ ,  $\delta$ ): –61.3 (s). HRMS-EI (m/z):  $[\text{M}]^+$  calcd for  $\text{C}_9\text{H}_5\text{BrFN}$ , 224.9584; found, 224.9589.

#### 4-Fluoroquinoline (**2e**).

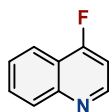

**2e**

The reaction was performed according to the general procedure A. The reaction was carried out with 81.8 mg (0.50 mmol) of **1e**. The resulting crude mixture was analyzed using  $^{19}\text{F}$  NMR with fluorobenzene (15.3 mg) as an internal standard to obtain the NMR yield of **2e** in 84% yield. Product **2e** was obtained as a yellow oil (48.2 mg, 0.33 mmol, 65% yield, isolated along with approximately 3% of starting material) after purification by silica-gel column chromatography ( $\text{SiO}_2$ ,  $\text{Et}_2\text{O}$ /hexane, 0:100–20:80).  $^1\text{H}$ ,  $^{13}\text{C}$ , and  $^{19}\text{F}$  NMR were in agreement with the literature.<sup>8</sup>

$^1\text{H}$  NMR (396 MHz,  $\text{CDCl}_3$ ,  $\delta$ ): 7.11 (dd,  $J = 5.1, 9.5$  Hz, 1H), 7.59–7.65 (m, 1H), 7.76–7.82 (ddd,  $J = 1.6, 6.9, 8.5$  Hz, 1H), 8.11–8.15 (m, 2H), 8.88 (dd,  $J = 4.9, 8.1$  Hz, 1H).  $^{13}\text{C}$  NMR (100 MHz,  $\text{CDCl}_3$ ,  $\delta$ ): 105.6 (d,  $J = 15.4$  Hz, CH), 119.5 (d,  $J = 12.5$  Hz, C), 120.4 (d,  $J = 4.8$  Hz, CH), 126.8 (CH), 129.1 (d,  $J = 3.8$  Hz, CH), 130.5 (CH), 150.4 (d,  $J = 4.8$  Hz, C), 151.4 (d,  $J = 7.7$  Hz, CH), 165.2 (d,  $J = 268.4$  Hz, C).  $^{19}\text{F}$  NMR (373 MHz,  $\text{CDCl}_3$ ,  $\delta$ ):  $-113.2$  (s). HRMS-EI ( $m/z$ ):  $[\text{M}]^+$  calcd for  $\text{C}_9\text{H}_6\text{FN}$ , 147.0479; found, 147.0482.

#### 1-Fluoroisoquinoline (**2f**).

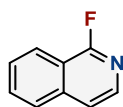

**2f**

The reaction was performed according to the general procedure A. The reaction was carried out with 81.8 mg (0.50 mmol) of **1f**. The resulting crude mixture was analyzed by  $^{19}\text{F}$  NMR with fluorobenzene (15.1 mg) as an internal standard to obtain the NMR yield of **2f** in 89% yield.  $^{19}\text{F}$  NMR was in agreement with the literature.<sup>6</sup>

The reaction was carried out with 104.1 mg (0.50 mmol) of 1-bromoisoquinoline (**1f'**). The resulting crude mixture was analyzed by  $^{19}\text{F}$  NMR with fluorobenzene (15.0 mg) as an internal standard to obtain the NMR yield of **2f** in 82% yield.  $^{19}\text{F}$  NMR was in agreement with the literature.<sup>6</sup>

The reaction was carried out with 127.6 mg (0.50 mmol) of 1-iodoisoquinoline (**1f''**). The resulting crude mixture was analyzed by  $^{19}\text{F}$  NMR with fluorobenzene (15.4 mg) as an internal standard to obtain the NMR yield of **2f** in >99% yield. Product **2f** was obtained as a yellow oil (62.7 mg, 0.43 mmol, 85% yield) after purification by silica-gel column chromatography ( $\text{SiO}_2$ ,  $\text{Et}_2\text{O}$ /pentane, 0:100–10:90).  $^1\text{H}$ ,  $^{13}\text{C}$ , and  $^{19}\text{F}$  NMR were in agreement with the literature.<sup>6</sup>

$^1\text{H}$  NMR (399 MHz,  $\text{CDCl}_3$ ,  $\delta$ ): 7.53 (dd,  $J = 1.4, 5.8$  Hz, 1H), 7.63–7.69 (m, 1H), 7.74–7.80 (m, 1H),

7.87 (d,  $J = 8.0$  Hz, 1H), 8.06 (dd,  $J = 1.2, 5.6$  Hz, 1H), 8.17 (d,  $J = 8.4$  Hz, 1H).  $^{13}\text{C}$  NMR (100 MHz,  $\text{CDCl}_3$ ,  $\delta$ ): 117.6 (d,  $J = 31.7$  Hz, C), 119.3 (d,  $J = 4.8$  Hz, CH), 123.0 (CH), 126.3 (d,  $J = 3.8$  Hz, CH), 127.9 (CH), 131.4 (CH), 139.1 (d,  $J = 16.3$  Hz, CH), 139.5 (d,  $J = 5.7$  Hz, C), 159.9 (d,  $J = 246.3$  Hz, C).  $^{19}\text{F}$  NMR (375 MHz,  $\text{CDCl}_3$ ,  $\delta$ ):  $-71.7$  (s). HRMS-EI ( $m/z$ ):  $[\text{M}]^+$  calcd for  $\text{C}_9\text{H}_6\text{FN}$ , 147.0479; found, 147.0483.

### 3-Chloro-2-fluoropyridine (**2g**).

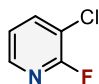

**2g**

The reaction was performed according to the general procedure A. The reaction was carried out with 73.8 mg (0.50 mmol) of **1g**. The resulting crude mixture was diluted with  $\text{CDCl}_3$  and then analyzed using  $^{19}\text{F}$  NMR with fluorobenzene (15.5 mg) as an internal standard to obtain the NMR yield of **2g** in 66% yield.  $^{19}\text{F}$  NMR was in agreement with the literature.<sup>7</sup> Since **2g** is a volatile compound, only the NMR yield was reported.

$^{19}\text{F}$  NMR (377 MHz,  $\text{CDCl}_3$ ,  $\delta$ ):  $-71.1$  (s).

### 3-Bromo-2-fluoropyridine (**2h**).

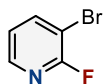

**2h**

The reaction was performed according to the general procedure A. The reaction was carried out with 96.0 mg (0.50 mmol) of **1h**. The resulting crude mixture was diluted with  $\text{CDCl}_3$  and then analyzed by  $^{19}\text{F}$  NMR with fluorobenzene (14.9 mg) as an internal standard to obtain the NMR yield of **2h** in 82% yield.  $^{19}\text{F}$  NMR was in agreement with the literature.<sup>9</sup> Since **2h** is a volatile compound, only the NMR yield was reported.

$^{19}\text{F}$  NMR (377 MHz,  $\text{CDCl}_3$ ,  $\delta$ ):  $-65.1$  (s).

### 2-Fluoro-4-iodopyridine (**2i**).

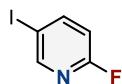

**2i**

The reaction was performed according to the general procedure A. The reaction was carried out with 119.7 mg (0.50 mmol) of **1i**. The resulting crude mixture was analyzed using  $^{19}\text{F}$  NMR with fluorobenzene (15.1 mg) as an internal standard to obtain the NMR yield of **2i** in 83% yield.  $^{19}\text{F}$  NMR was in agreement with an authentic sample (F0773, Tokyo Chemical Industry Co.). Since **2i** is a



volatile compound, only the NMR yield was reported.

$^{19}\text{F}$  NMR (373 MHz,  $\text{CDCl}_3$ ,  $\delta$ ):  $-70.1$  (s).

### 2,6-Difluoropyridine (**2j**).

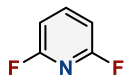

**2j**

The reaction was performed according to the general procedure A. The reaction was carried out with 74.0 mg (0.50 mmol) of **1j**, 116.7 mg (2.0 mmol) of KF, and 248.8 mg (1.5 mmol) of  $\text{Et}_4\text{NCl}$ . The resulting crude mixture was diluted with  $\text{CDCl}_3$  and then analyzed using  $^{19}\text{F}$  NMR with fluorobenzene (15.1 mg) as an internal standard to obtain the NMR yield of **2j** in 75% yield.  $^{19}\text{F}$  NMR was in agreement with the literature.<sup>10</sup> Since **2j** is a volatile compound, only the NMR yield was reported.

$^{19}\text{F}$  NMR (373 MHz,  $\text{CDCl}_3$ ,  $\delta$ ):  $-68.1$  (s).

### 2-Fluoropyrazine (**2k**).

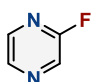

**2k**

The reaction was performed according to the general procedure A. The reaction was carried out with 57.4 mg (0.50 mmol) of **1k**. The resulting crude mixture was diluted with  $\text{CDCl}_3$  and then analyzed using  $^{19}\text{F}$  NMR with fluorobenzene (14.9 mg) as an internal standard to obtain the NMR yield of **2k** in 63% yield.  $^{19}\text{F}$  NMR was in agreement with the literature.<sup>11</sup> Since **2k** is a volatile compound, only the NMR yield was reported.

$^{19}\text{F}$  NMR (377 MHz,  $\text{CDCl}_3$ ,  $\delta$ ):  $-79.4$  (s).

### 5-Cyano-2-fluoropyridine (**2l**).

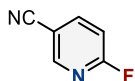

**2l**

The reaction was performed according to the general procedure B. The reaction was carried out with 69.2 mg (0.50 mmol) of **1l** for 30 min. The resulting crude mixture was analyzed by  $^{19}\text{F}$  NMR with fluorobenzene (15.1 mg) as an internal standard to obtain the NMR yield of **2l** in 96% yield. Product **2l** was obtained as a colorless solid (33.5 mg, 0.27 mmol, 55% yield) after purification by silica-gel column chromatography ( $\text{SiO}_2$ ,  $\text{Et}_2\text{O}$ /hexane, 0:100–20:80).  $^1\text{H}$ ,  $^{13}\text{C}$ , and  $^{19}\text{F}$  NMR were in agreement with the literature.<sup>12</sup>

$^1\text{H}$  NMR (396 MHz,  $\text{CDCl}_3$ ,  $\delta$ ): 7.08–7.13 (m, 1H), 8.05–8.13 (m, 1H), 8.59 (d,  $J = 2.4$  Hz, 1H).  $^{13}\text{C}$

NMR (100 MHz, CDCl<sub>3</sub>,  $\delta$ ): 108.0 (d,  $J$  = 4.8 Hz, C), 110.8 (d,  $J$  = 37.3 Hz, CH), 115.5 (C), 144.4 (d,  $J$  = 9.6 Hz, CH), 152.2 (d,  $J$  = 17.3 Hz, CH), 164.9 (d,  $J$  = 249.2 Hz, C). <sup>19</sup>F NMR (373 MHz, CDCl<sub>3</sub>,  $\delta$ ): -57.8 (s). HRMS-APCI (m/z): [M+H]<sup>+</sup> calcd for C<sub>6</sub>H<sub>4</sub>FN<sub>2</sub>, 123.0353; found, 123.0354.

#### 4-Cyano-2-fluoropyridine (**2m**).

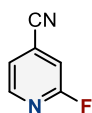

**2m**

The reaction was performed according to the general procedure B. The reaction was carried out with 69.3 mg (0.50 mmol) of **1m** for 30 min. The resulting crude mixture was analyzed using <sup>19</sup>F NMR with fluorobenzene (15.2 mg) as an internal standard to obtain a NMR yield of **2m** in a 73% yield. <sup>19</sup>F NMR was in agreement with an authentic sample (C3383, Tokyo Chemical Industry Co.). Since **2m** is a volatile compound, only the NMR yield was reported.

<sup>19</sup>F NMR (369 MHz, CDCl<sub>3</sub>,  $\delta$ ): -63.5 (s).

#### 3-Cyano-2-fluoropyridine (**2n**).

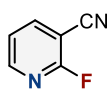

**2n**

The reaction was performed according to the general procedure B. The reaction was carried out with 69.3 mg (0.50 mmol) of **1n** for 30 min. The resulting crude mixture was analyzed using <sup>19</sup>F NMR with fluorobenzene (15.3 mg) as an internal standard to obtain a NMR yield of **2n** in 92% yield. Product **2n** was obtained as a colorless solid (32.9 mg, 0.27 mmol, 54% yield) after purification by silica-gel column chromatography (SiO<sub>2</sub>, Et<sub>2</sub>O/hexane, 0:100–30:70). <sup>1</sup>H, <sup>13</sup>C, and <sup>19</sup>F NMR were in agreement with the literature.<sup>9</sup>

<sup>1</sup>H NMR (396 MHz, CDCl<sub>3</sub>,  $\delta$ ): 7.38 (ddd,  $J$  = 1.6, 4.9, 7.3 Hz, 1H), 8.12 (ddd,  $J$  = 1.6, 6.9, 9.1 Hz, 1H), 8.48–8.50 (m, 1H). <sup>13</sup>C NMR (100 MHz, CDCl<sub>3</sub>,  $\delta$ ): 97.3 (d,  $J$  = 31.6 Hz, C), 112.5 (d,  $J$  = 5.7 Hz, C), 121.6 (d,  $J$  = 3.8 Hz, CH), 144.4 (CH), 152.0 (d,  $J$  = 14.3 Hz, CH), 162.6 (d,  $J$  = 247.2 Hz, C). <sup>19</sup>F NMR (373 MHz, CDCl<sub>3</sub>,  $\delta$ ): -60.4 (s). HRMS-APCI (m/z): [M+H]<sup>+</sup> calcd for C<sub>6</sub>H<sub>4</sub>FN<sub>2</sub>, 123.0353; found, 123.0354.

### 2-Fluoro-5-(trifluoromethyl)pyridine (**2o**).

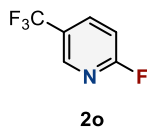

The reaction was performed according to the general procedure B. The reaction was carried out with 90.6 mg (0.50 mmol) of **1o** for 30 min. The resulting crude mixture was analyzed using  $^1\text{H}$  NMR with dibromomethane (18.5 mg) as an internal standard to obtain a  $^1\text{H}$  NMR yield of **2o** in 76% yield.  $^1\text{H}$  NMR was in agreement with an authentic sample (F0995, Tokyo Chemical Industry Co.). Since **2o** is a volatile compound, only the NMR yield was reported.

### 9-Benzyl-6-fluoro-9H-purine (**2p**).

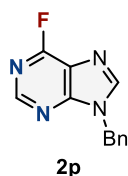

The reaction was performed according to the general procedure B. The reaction was carried out with 122.0 mg (0.50 mmol) of **1p** for 60 min. The resulting crude mixture was analyzed using  $^{19}\text{F}$  NMR with fluorobenzene (15.0 mg) as an internal standard to obtain a NMR yield of **2p** in 46% yield. Product **2p** was obtained as a white solid (46.4 mg, 0.20 mmol, 41% yield) after purification by silica-gel column chromatography ( $\text{SiO}_2$ , EtOAc/hexane, 25:75–35:65).  $^1\text{H}$ ,  $^{13}\text{C}$ , and  $^{19}\text{F}$  NMR were in agreement with the literature.<sup>8</sup>

$^1\text{H}$  NMR (396 MHz,  $\text{CDCl}_3$ ,  $\delta$ ): 5.48 (s, 2H), 7.29–7.42 (m, 5H), 8.08 (s, 1H), 8.68 (s, 1H).  $^{13}\text{C}$  NMR (100 MHz,  $\text{CDCl}_3$ ,  $\delta$ ): 47.9 ( $\text{CH}_2$ ), 120.1 (d,  $J = 29.6$  Hz, C), 127.9 (CH), 128.8 (CH), 129.2 (CH), 134.5 (C), 144.8 (CH), 152.0 (d,  $J = 14.2$  Hz, CH), 155.6 (d,  $J = 11.4$  Hz, C), 159.8 (d,  $J = 260.3$  Hz, C).  $^{19}\text{F}$  NMR (373 MHz,  $\text{CDCl}_3$ ,  $\delta$ ): -70.3 (s). HRMS-ESI ( $m/z$ ):  $[\text{M}+\text{H}]^+$  calcd for  $\text{C}_{12}\text{H}_{10}\text{FN}_4$ , 229.0884; found, 229.0882.

### 7-Benzyl-4-fluoro-7H-pyrrolo[2,3-d]pyrimidine (**2q**).

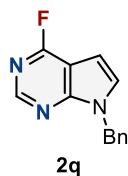

The reaction was performed according to the general procedure B. The reaction was carried out with 121.4 mg (0.50 mmol) of **1q** for 60 min. The resulting crude mixture was analyzed using  $^{19}\text{F}$  NMR with fluorobenzene (15.1 mg) as an internal standard to obtain the NMR yield of **2q** in 90% yield. Product **2q** was obtained as a white solid (85.1 mg, 0.37 mmol, 75% yield) after purification by silica-

gel column chromatography (SiO<sub>2</sub>, Et<sub>2</sub>O/hexane, 0:100–20:80). <sup>1</sup>H, <sup>13</sup>C, and <sup>19</sup>F NMR were in agreement with the literature.<sup>6</sup>

<sup>1</sup>H NMR (401 MHz, CDCl<sub>3</sub>, δ): 5.48 (s, 2H), 6.61 (d, *J* = 3.2 Hz, 1H), 7.18–7.24 (m, 3H), 7.29–7.38 (m, 3H), 8.57 (d, *J* = 0.8 Hz, 1H). <sup>13</sup>C NMR (100 MHz, CDCl<sub>3</sub>, δ): 48.6 (CH<sub>2</sub>), 98.0 (d, *J* = 4.8 Hz, CH), 104.2 (d, *J* = 33.3 Hz, C), 127.5 (CH), 128.1 (CH), 128.4 (d, *J* = 2.0 Hz, CH), 128.9 (CH), 136.3 (C), 150.6 (d, *J* = 14.3 Hz, CH), 154.7 (d, *J* = 12.3 Hz, C), 162.3 (d, *J* = 252.7 Hz, C). <sup>19</sup>F NMR (373 MHz, CDCl<sub>3</sub>, δ): –66.5 (s). HRMS-ESI (*m/z*): [M+H]<sup>+</sup> calcd for C<sub>13</sub>H<sub>11</sub>FN<sub>3</sub>, 228.0932; found, 228.0928.

#### 4,6-Difluoro-2-phenylpyrimidine (2r).

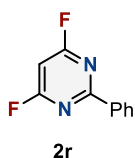

The reaction was performed according to the general procedure B. The reaction was carried out with 112.6 mg (0.50 mmol) of **1r**, 116.1 mg (2.0 mmol) of KF, and 123.9 mg (0.75 mmol) of Et<sub>4</sub>NCl for 30 min. The resulting crude mixture was analyzed by <sup>19</sup>F NMR with fluorobenzene (15.1 mg) as an internal standard to obtain the NMR yield of **2r** in 65% yield. Product **2r** was obtained as a white solid (53.2 mg, 0.28 mmol, 55% yield) after purification by silica-gel column chromatography (SiO<sub>2</sub>, Et<sub>2</sub>O/hexane, 0:100–2:98). <sup>1</sup>H, <sup>13</sup>C, and <sup>19</sup>F NMR were in agreement with the literature.<sup>6</sup>

<sup>1</sup>H NMR (401 MHz, CDCl<sub>3</sub>, δ): 6.44 (t, *J* = 2.2 Hz, 1H), 7.45–7.60 (m, 3H), 8.39–8.47 (m, 2H). <sup>13</sup>C NMR (101 MHz, CDCl<sub>3</sub>, δ): 89.9 (t, *J* = 37.1 Hz, CH), 128.73 (CH), 128.75 (CH), 132.4 (CH), 134.7 (C), 166.0 (t, *J* = 17.3 Hz, C), 172.2 (dd, *J* = 18.8, 256.7 Hz, C). <sup>19</sup>F NMR (377 MHz, CDCl<sub>3</sub>, δ): –56.5 (s). HRMS-APCI (*m/z*): [M+H]<sup>+</sup> calcd for C<sub>10</sub>H<sub>7</sub>F<sub>2</sub>N<sub>2</sub>, 193.0572; found, 193.0566.

#### 3-Chloro-4-fluoronitrobenzene (2s).

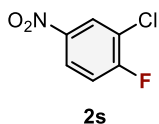

The reaction was performed according to the general procedure B. The reaction was carried out with 95.8 mg (0.50 mmol) of **1s** for 45 min. The resulting crude mixture was analyzed using <sup>19</sup>F NMR with fluorobenzene (15.2 mg) as an internal standard to obtain an NMR yield of **2s** in 80% yield. Product **2s** was obtained as a yellow solid (58.0 mg, 0.33 mmol, 66% yield, isolated along with approximately 3% of starting material) after purification by silica-gel column chromatography (SiO<sub>2</sub>, Et<sub>2</sub>O/pentane, 0:100–3:97). <sup>1</sup>H, <sup>13</sup>C, and <sup>19</sup>F NMR were in agreement with the literature.<sup>13</sup>

<sup>1</sup>H NMR (401 MHz, CDCl<sub>3</sub>, δ): 7.33 (dd, *J* = 8.2, 9.0 Hz, 1H), 8.19 (ddd, *J* = 2.7, 4.3, 9.1 Hz, 1H),

8.37 (dd,  $J = 2.8, 6.0$  Hz, 1H).  $^{13}\text{C}$  NMR (101 MHz,  $\text{CDCl}_3$ ,  $\delta$ ): 117.2 (d,  $J = 24.1$  Hz, CH), 122.5 (d,  $J = 19.2$  Hz, C), 124.0 (d,  $J = 8.7$  Hz, CH), 126.7 (CH), 144.2 (C), 161.9 (d,  $J = 260.0$  Hz, C).  $^{19}\text{F}$  NMR (377 MHz,  $\text{CDCl}_3$ ,  $\delta$ ):  $-104.4$  (s). HRMS-EI ( $m/z$ ):  $[\text{M}]^+$  calcd for  $\text{C}_6\text{H}_3\text{ClFNO}_2$ , 174.9831; found, 174.9832.

**Ethyl 1-cyclopropyl-6,7-difluoro-4-oxo-1,4-dihydro-1,8-naphthyridine-3-carboxylate (2t).**

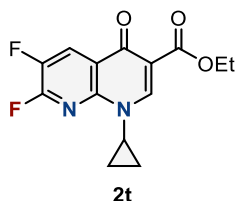

The reaction was performed according to the general procedure A. The reaction was carried out with 155.3 mg (0.50 mmol) of **1t**. The resulting crude mixture was analyzed using  $^{19}\text{F}$  NMR with fluorobenzene (14.7 mg) as an internal standard to obtain the NMR yield of **2t** in 74% yield. Product **2t** was obtained as a white solid (73.1 mg, 0.25 mmol, 50% yield) after purification by silica-gel column chromatography ( $\text{SiO}_2$ , EtOAc/hexane, 40:60–50:50).  $^1\text{H}$ ,  $^{13}\text{C}$ , and  $^{19}\text{F}$  NMR were in agreement with the literature.<sup>6</sup>

$^1\text{H}$  NMR (399 MHz,  $\text{CDCl}_3$ ,  $\delta$ ): 1.04–1.08 (m, 2H), 1.32 (q,  $J = 6.8$  Hz, 2H), 1.41 (t,  $J = 7.0$  Hz, 3H), 3.59 (tt,  $J = 3.7, 7.4$  Hz, 1H), 4.41 (q,  $J = 7.0$  Hz, 2H), 8.55 (t,  $J = 9.0$  Hz, 1H), 8.65 (s, 1H).  $^{13}\text{C}$  NMR (100 MHz,  $\text{CDCl}_3$ ,  $\delta$ ): 7.6 ( $\text{CH}_2$ ), 14.3 ( $\text{CH}_3$ ), 34.3 (CH), 61.2 ( $\text{CH}_2$ ), 112.3 (C), 122.8 (d,  $J = 2.8$  Hz, C), 126.0 (dd,  $J = 5.2, 16.8$  Hz, CH), 143.5 (dd,  $J = 27.8, 261.6$  Hz, C), 144.3 (d,  $J = 14.3$  Hz, C), 148.7 (CH), 152.3 (dd,  $J = 16.7, 249.7$  Hz, C), 164.6 (C), 172.8 (C).  $^{19}\text{F}$  NMR (375 MHz,  $\text{CDCl}_3$ ,  $\delta$ ):  $-142.4$  (d,  $J = 23.3$  Hz, 1F),  $-77.3$  (d,  $J = 34.5$  Hz, 1F). HRMS-EI ( $m/z$ ):  $[\text{M}]^+$  calcd for  $\text{C}_{14}\text{H}_{12}\text{F}_2\text{N}_2\text{O}_3$ , 294.0811; found, 294.0814.

**Ethyl 1-(2,4-difluorophenyl)-6,7-difluoro-1,4-dihydro-4-oxo-1,8-naphthyridine-3-carboxylate (2u).**

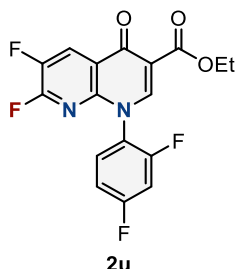

The reaction was performed according to the general procedure A. The reaction was carried out with 191.3 mg (0.50 mmol) of **1u**. The resulting crude mixture was analyzed using  $^{19}\text{F}$  NMR with fluorobenzene (15.3 mg) as an internal standard to obtain the NMR yield of **2u** in 78% yield. Product

**2u** was obtained as a white solid (116.2 mg, 0.32 mmol, 63% yield) after purification by silica-gel column chromatography (SiO<sub>2</sub>, EtOAc/hexane, 40:60).

<sup>1</sup>H NMR (399 MHz, CDCl<sub>3</sub>, δ): 1.41 (t, *J* = 7.0 Hz, 3H), 4.41 (q, *J* = 7.2 Hz, 2H), 7.08–7.15 (m, 2H), 7.41–7.46 (m, 1H), 8.53 (s, 1H), 8.60 (t, *J* = 8.8 Hz, 1H). <sup>13</sup>C NMR (100 MHz, CDCl<sub>3</sub>, δ): 14.2 (CH<sub>3</sub>), 61.4 (CH<sub>2</sub>), 105.6 (dd, *J* = 23.0, 26.8 Hz, CH), 112.6 (dd, *J* = 3.4, 22.5 Hz, CH), 113.6 (C), 122.3 (d, *J* = 2.9 Hz, C), 123.3 (dd, *J* = 3.8, 13.4 Hz, C), 126.2 (dd, *J* = 5.3, 16.8 Hz, CH), 129.9 (d, *J* = 10.6 Hz, CH), 143.2 (d, *J* = 13.4 Hz, C), 143.8 (dd, *J* = 27.3, 262.2 Hz, C), 149.1 (CH), 152.6 (dd, *J* = 17.3, 252.1 Hz, C), 157.9 (dd, *J* = 12.4, 255.9 Hz, C), 163.4 (dd, *J* = 10.5, 254.1 Hz, C), 164.1 (C), 172.9 (C). <sup>19</sup>F NMR (375 MHz, CDCl<sub>3</sub>, δ): -141.4 (d, *J* = 34.9 Hz, 1F), -115.0 (s, 1F), -105.2 (s, 1F), -76.8 (d, *J* = 22.9 Hz, 1F). HRMS-EI (*m/z*): [M]<sup>+</sup> calcd for C<sub>17</sub>H<sub>10</sub>F<sub>4</sub>N<sub>2</sub>O<sub>3</sub>, 366.0622; found, 366.0629.

#### *N*-(4'-Chlorobiphenyl-2-yl)-2-fluoronicotinamide (**2v**).

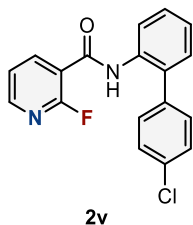

The reaction was performed according to the general procedure A. The reaction was carried out with 171.5 mg (0.50 mmol) of **1v**. The resulting crude mixture was analyzed using <sup>19</sup>F NMR with fluorobenzene (15.5 mg) as an internal standard to obtain a NMR yield of **2v** in 55%. Product **2v** was obtained as a white solid (48.2 mg, 0.15 mmol, 30% yield) after purification by silica-gel column chromatography (SiO<sub>2</sub>, Et<sub>2</sub>O/hexane, 0:100–25:75) and recycling preparative GPC.

<sup>1</sup>H NMR (396 MHz, CDCl<sub>3</sub>, δ): 7.21–7.31 (m, 2H), 7.31–7.42 (m, 3H), 7.42–7.52 (m, 3H), 8.31–8.33 (m, 1H), 8.49 (d, *J* = 8.2 Hz, 1H), 8.58 (brs, 1H), 8.62 (ddd, *J* = 2.2, 7.5, 9.9 Hz, 1H). <sup>13</sup>C NMR (99 MHz, CDCl<sub>3</sub>, δ): 116.2 (d, *J* = 28.2 Hz, C), 121.9 (CH), 122.6 (d, *J* = 4.7 Hz, CH), 125.1 (CH), 128.8 (CH), 129.3 (CH), 130.2 (CH), 130.6 (CH), 132.0 (C), 134.4 (C), 134.5 (C), 136.0 (C), 143.7 (d, *J* = 1.9 Hz, CH), 150.6 (d, *J* = 16.9 Hz, CH), 159.4 (d, *J* = 235.8 Hz, C), 159.5 (d, *J* = 8.5 Hz, C). <sup>19</sup>F NMR (377 MHz, CDCl<sub>3</sub>, δ): -65.0 (s). HRMS-EI (*m/z*): [M]<sup>+</sup> calcd for C<sub>18</sub>H<sub>12</sub>ClFN<sub>2</sub>O, 326.0617; found, 326.0617.

#### 4-Fluorobenzonitrile (**2w**).

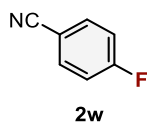

The reaction was performed according to the general procedure B. The reaction was carried out with 68.7 mg (0.50 mmol) of 4-chlorobenzonitrile (**1w**) for 30 min. The resulting crude mixture was

analyzed by  $^{19}\text{F}$  NMR with fluorobenzene (15.1 mg) as an internal standard to obtain the NMR yield of **2w** in 3% yield.  $^{19}\text{F}$  NMR was in agreement with the literature.<sup>14</sup>

The reaction was carried out with 74.0 mg (0.50 mmol) of 4-nitrobenzotrile (**1w'**) for 30 min. The resulting crude mixture was analyzed by  $^{19}\text{F}$  NMR with fluorobenzene (15.3 mg) as an internal standard to obtain the NMR yield of **2w** in 62% yield.  $^{19}\text{F}$  NMR was in agreement with the literature.<sup>14</sup> Since **2w** is a volatile compound, only the NMR yield was reported.

$^{19}\text{F}$  NMR (373 MHz,  $\text{CDCl}_3$ ,  $\delta$ ):  $-102.8$  (s).

## 12. References

1. Bliman, D.; Pettersson, M.; Bood, M.; Grotli, M. *Tetrahedron Lett.* **2014**, *55*, 2929.
2. Wood, A. B.; Nandiwale, K. Y.; Mo, Y.; Jin, B.; Pomberger, A.; Schultz, V.; Gallou, F.; Jensen, K. F.; Lipshutz, B. H. *Green Chem.* **2020**, *22*, 3441.
3. Karoli, T.; Mamidyala, S. K.; Zuegg, J.; Fry, S. R.; Tee, E. H. L.; Bradford, T. A.; Madala, P. K.; Huang, J. X.; Ramu, S.; Butler, M. S.; Cooper, M. A. *Bioorg. Med. Chem. Lett.* **2012**, *22*, 2428.
4. Allen, L. J.; Lee, S. H.; Cheng, Y.; Hanley, P. S.; Muhuhi, J. M.; Kane, E.; Powers, S. L.; Anderson, J. E.; Bell, B. M.; Roth, G. A.; Sanford, M. S.; Bland, D. C. *Org. Process Res. Dev.* **2014**, *18*, 1045.
5. Schimler, S. D.; Ryan, S. J.; Bland, D. C.; Anderson, J. E.; Sanford, M. S. *J. Org. Chem.* **2015**, *80*, 12137.
6. Morales-Colón, M. T.; See, Y. Y.; Lee, S. J.; Scott, P. J. H.; Bland, D. C.; Sanford, M. S. *Org. Lett.* **2021**, *23*, 4493.
7. Roger, J.; Royer, S.; Cattey, H.; Savateev, A.; Smaliy, R. V.; Kostyuk, A. N.; Hierso, J.-C. *Eur. J. Inorg. Chem.* **2017**, *2017*, 330.
8. Taylor, N. J.; Emer, E.; Preshlock, S.; Schedler, M.; Tredwell, M.; Verhoog, S.; Mercier, J.; Genicot, C.; Gouverneur, V. *J. Am. Chem. Soc.* **2017**, *139*, 8267.
9. Katoh, T.; Tomata, Y.; Tsukamoto, T.; Nakada, Y. *Tetrahedron Lett.* **2015**, *56*, 6043.
10. Ryan, S. J.; Schimler, S. D.; Bland, D. C.; Sanford, M. S. *Org. Lett.* **2015**, *17*, 1866.
11. Plé, N.; Turck, A.; Heynderickx, A.; Quéguiner, G. *Tetrahedron* **1998**, *54*, 4899.
12. Johansen, M. B.; Lindhardt, A. T. *Chem. Commun.* **2018**, *54*, 825.
13. Lacour, M.-A.; Zablocka, M.; Duhayon, C.; Majoral, J.-P.; Taillefer, M. *Adv. Synth. Catal.* **2008**, *350*, 2677.
14. Wood, A. B.; Kincaid, J. R. A.; Lipshutz, B. H. *Green Chem.* **2022**, *24*, 2853.



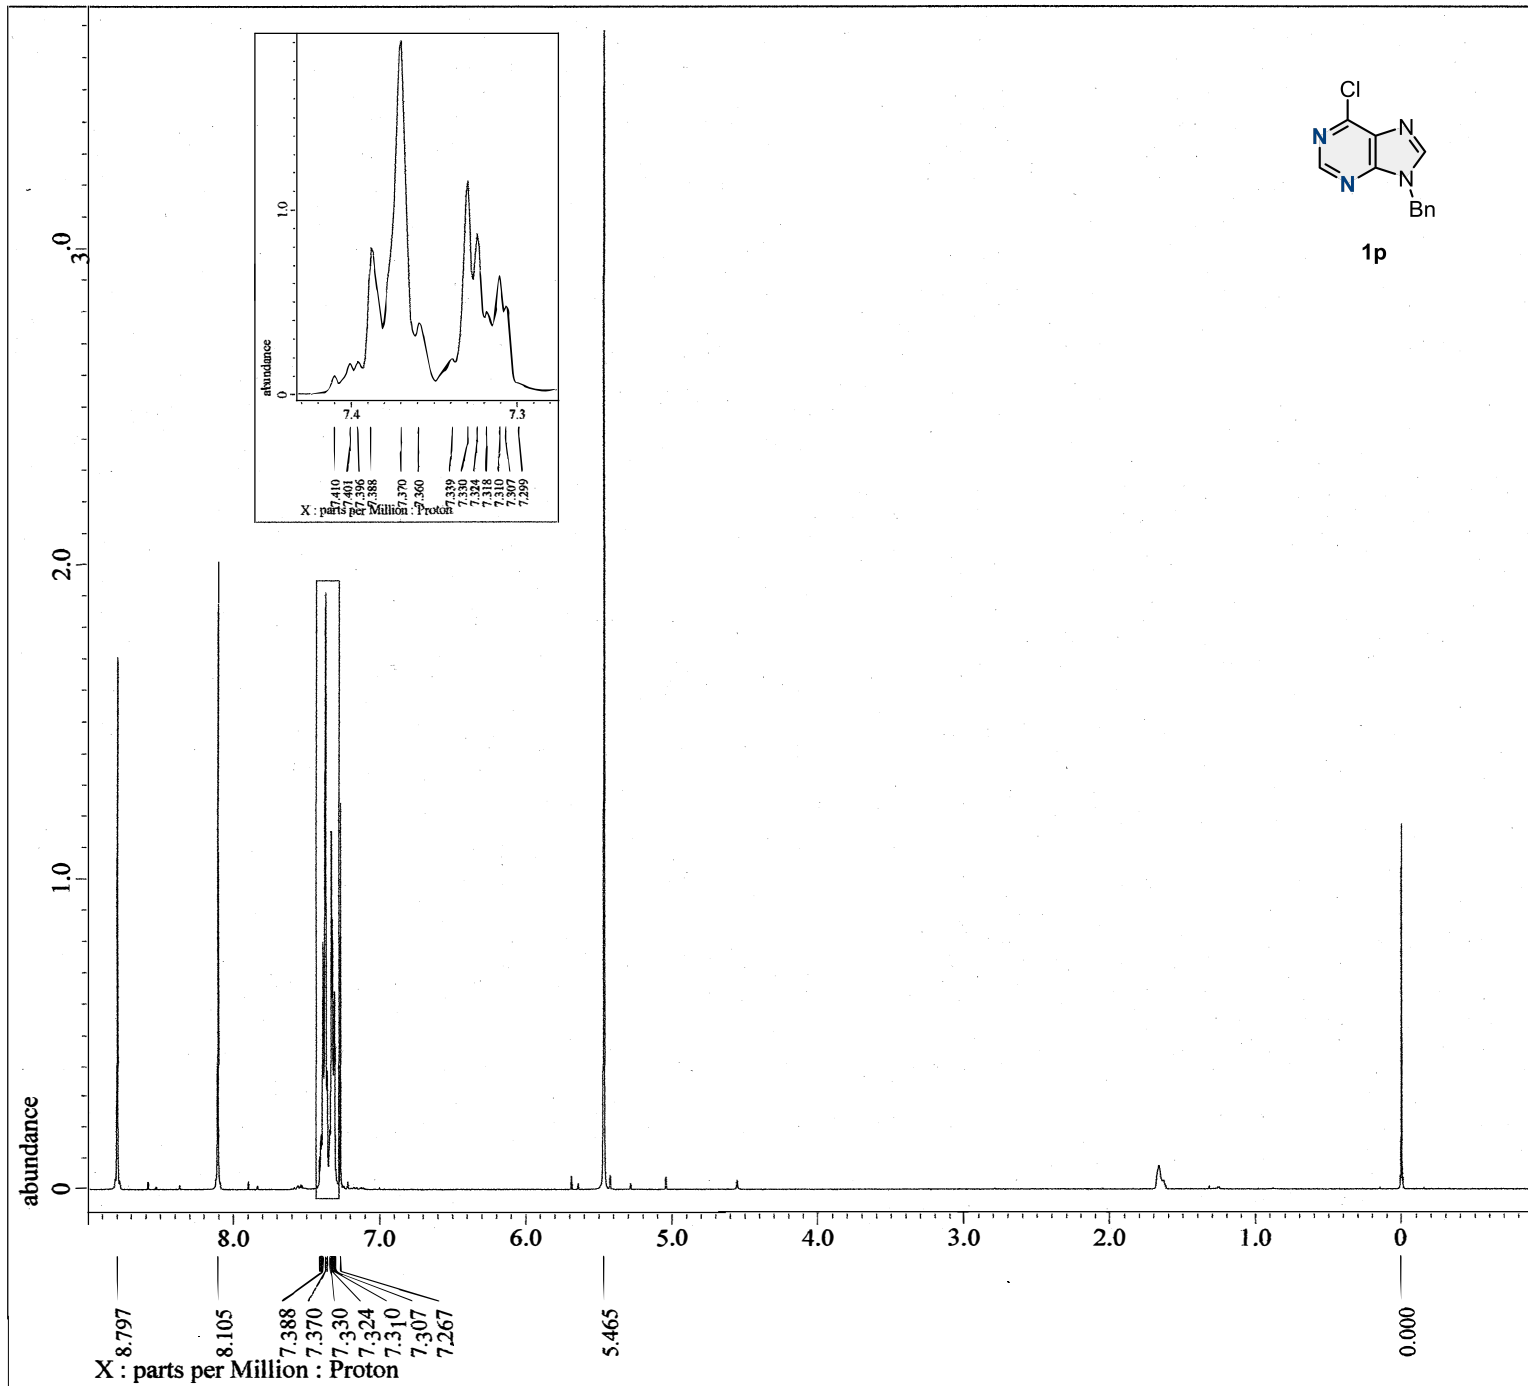

```

---- PROCESSING PARAMETERS ----
sexp( 0.2[Hz], 0.0[s] )
trapezoid( 0[%], 0[%], 80[%], 100[%] )
zerofill( 1, TRUE )
fft( 1, TRUE, TRUE )
ma chiephase
ppm

```

Derived from: MKN278-pure Proton-1-1.jdf

```

Filename      = MKN278-pure_Proton-1-2
Author       = element
Experiment   = proton_utojxp
Sample Id    = MKN278-pu re
Solvent      = CHLOROFORM-D
Actual Start Time = 18-JAN-2024 10:47:11
Revision Time = 15-JUN-2024 12:17:08

```

```

Comment      = single pulse
Data Format   = 1D COMPLEX
Dim Size     = 13107
X Domain     = Proton
Dim Title    = Proton
Dim Units    = [ppm]
Dimensions   = X
Spectrometer = DELTA2_NMR

```

```

Field Strength = 9.2982153[T] (400[MHz])
X Acq Duration = 2.20725248[s]
X Domain       = Proton
X Freq         = 395.88430144[MHz]
X Offset       = 5[ppm]
X Points       = 16384
X Prescans     = 1
X Resolution   = 0.45305193[Hz]
X Sweep        = 7.42280285[kHz]
X Sweep Clipped = 5.93824228[kHz]
Irr Domain     = Proton
Irr Freq       = 395.88430144[MHz]
Irr Offset     = 5[ppm]
Tri Domain     = Proton
Tri Freq       = 395.88430144[MHz]
Tri Offset     = 5[ppm]
Bl ankin      = 2.0[us]
Cli pped      = FALSE
Scans         = 8
Total Scans   = 8

```

```

Relation Day  = 5[s]
Recvr Gain    = 56
Temp Get      = 19.1[dc]
X 90 Width    = 6.34[us]
X Acq Time    = 2.20725248[s]
X Angle       = 45[deg]
X Atn         = 5[dB]
X Pulse       = 3.17[u s]
I r Mode      = Off
Tri Mode      = Off
Da te Loop    = 500
Dante Preset  = FALSE
Decimation Rate = 0
Initia lWait  = 1[s]
Phase        = {0, 90, 270, 180, 180,

```

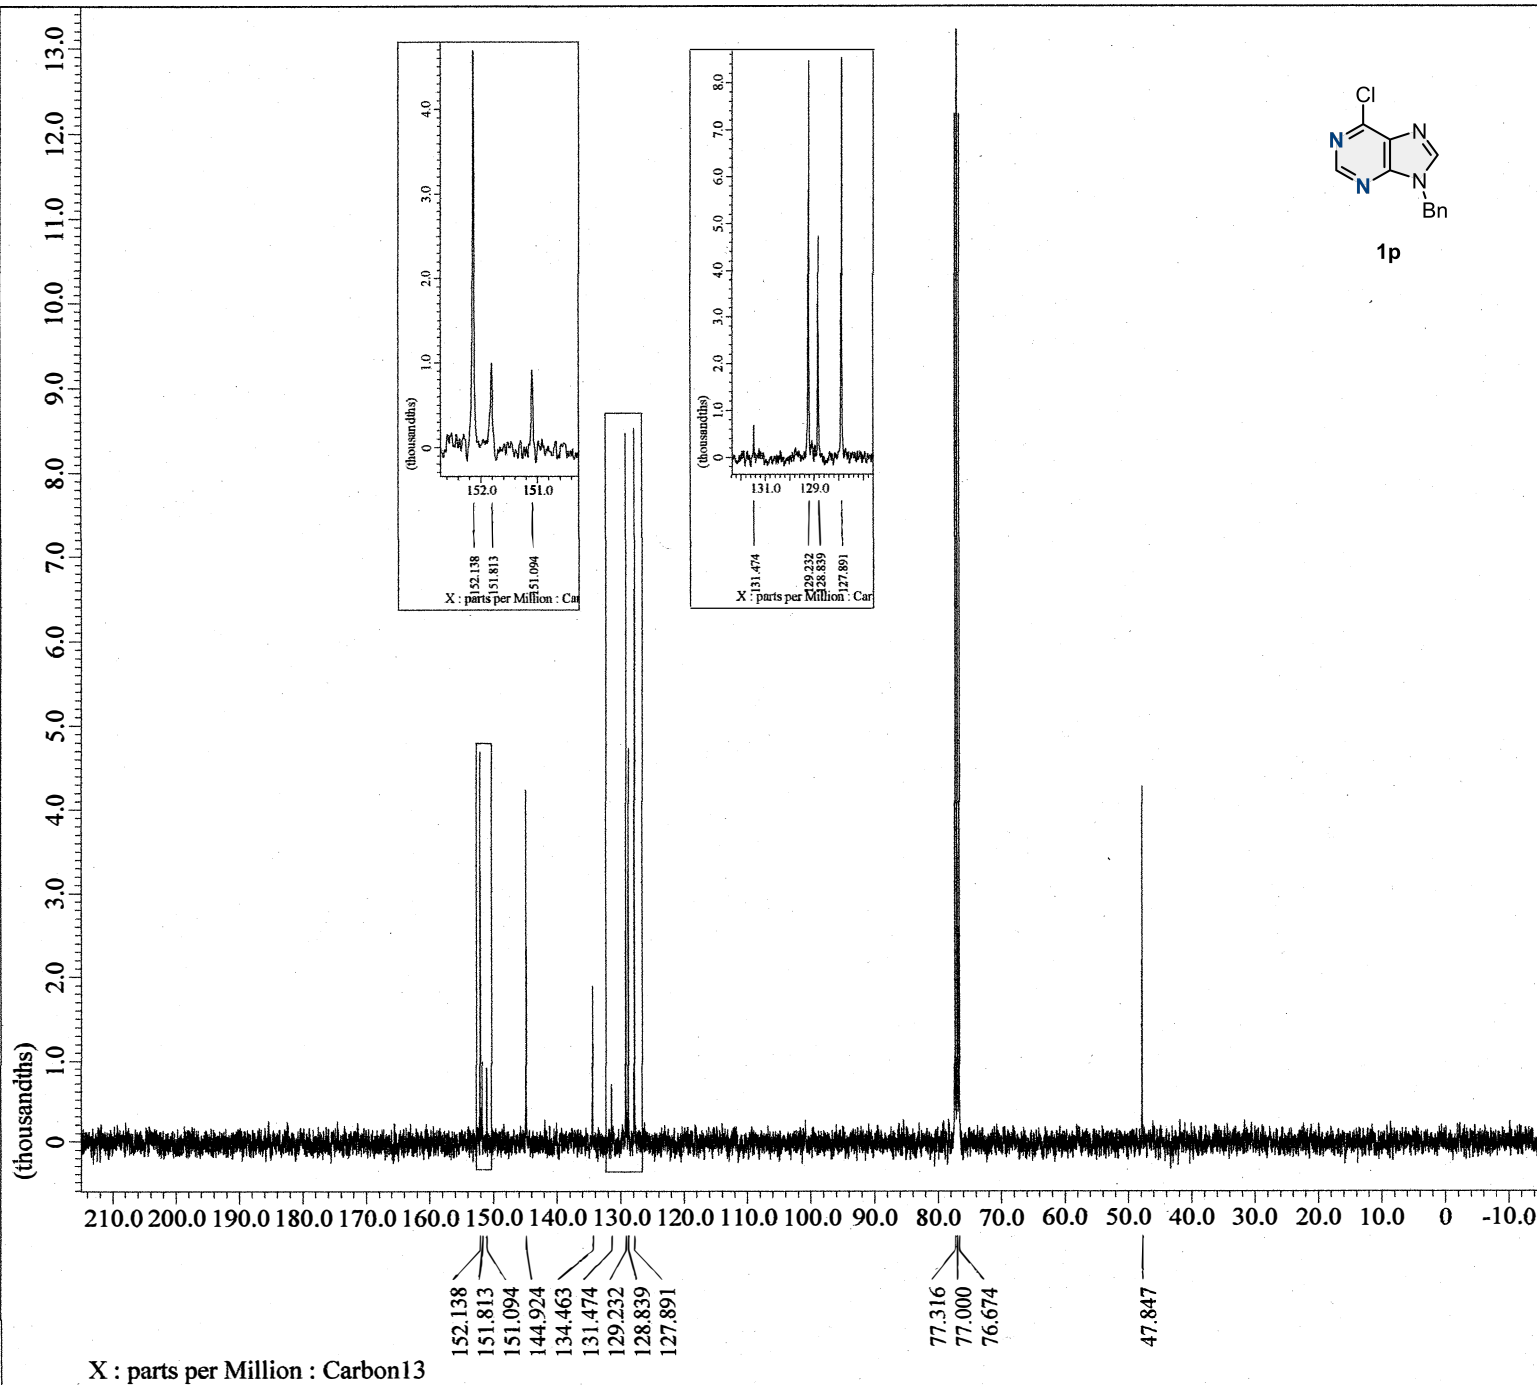

```

---- PROCESSING PARAMETERS ----
sexp( 2.0[Hz], 0.0[s] )
trapezoid( 0[%], 0[%], 80[%], 100[%] )
zerofill( 1, TRUE )
fft( 1, TRUE, TRUE )
machinephase
ppm

```

Derived from: MKN278-pure Carbon-1-1.jdf

```

Filename           = MKN278-pure_Carbon-
Author             = element
Experiment         = carbon_auto.jxp
Sample_Id         = MKN278-pure
Solvent           = CHLOROFORM-D
Actual_Start_Time = 18-JAN-2024 11:01:3
Revision_Time     = 15-JUN-2024 14:30:4

```

```

Comment           = single pulse decoupl
Data Format        = 1D COMPLEX
Dim Size          = 26214
X_Domain          = Carbon13
Dim Title         = Carbon13
Dim Units         = [ppm]
Dimensions        = X
Spectrometer      = DELTA2_NMR

```

```

Field Strength    = 9.2982153[T] (400[M
X_Acq_Duration    = 1.048576[s]
X_Domain          = Carbon13
X_Freq            = 99.54517646[MHz]
X_Offset          = 100[ppm]
X_Points          = 32768
X_Prescans        = 4
X_Resolution      = 0.95367432[Hz]
X_Sweep           = 31.25[kHz]
X_Sweep_Clippped = 25[kHz]
Irr_Domain        = Proton
Irr_Freq          = 395.88430144[MHz]
Irr_Offset        = 5[ppm]
Blanking          = 5.0[us]
Clipped           = FALSE
Scans             = 128
Total_Scans       = 128

```

```

Relaxation_Delay  = 2[s]
Recvr Gain        = 50
Temp_Get          = 18.6[dC]
X_90_Width        = 11.5[us]
X_Acq_Time        = 1.048576[s]
X_Angle           = 30[deg]
X_Atn             = 9[dB]
X_Pulse           = 3.83333333[us]
Irr_Atn_Dec       = 30.172[dB]
Irr_Atn_Dec_Calc = 30.172[dB]
Irr_Atn_Dec_Default_Calc = 30.172[dB]
Irr_Atn_Noise    = 30.172[dB]
Irr_Dec_Bandwidth_Hz = 4.7826087[kHz]
Irr_Dec_Bandwidth_Ppm = 12.08082432[ppm]
Irr_Dec_Freq     = 395.88430144[MHz]
Irr_Dec_Merit_Factor = 2.2
Irr_Decoupling   = TRUE
Irr_Noise        = TRUE

```

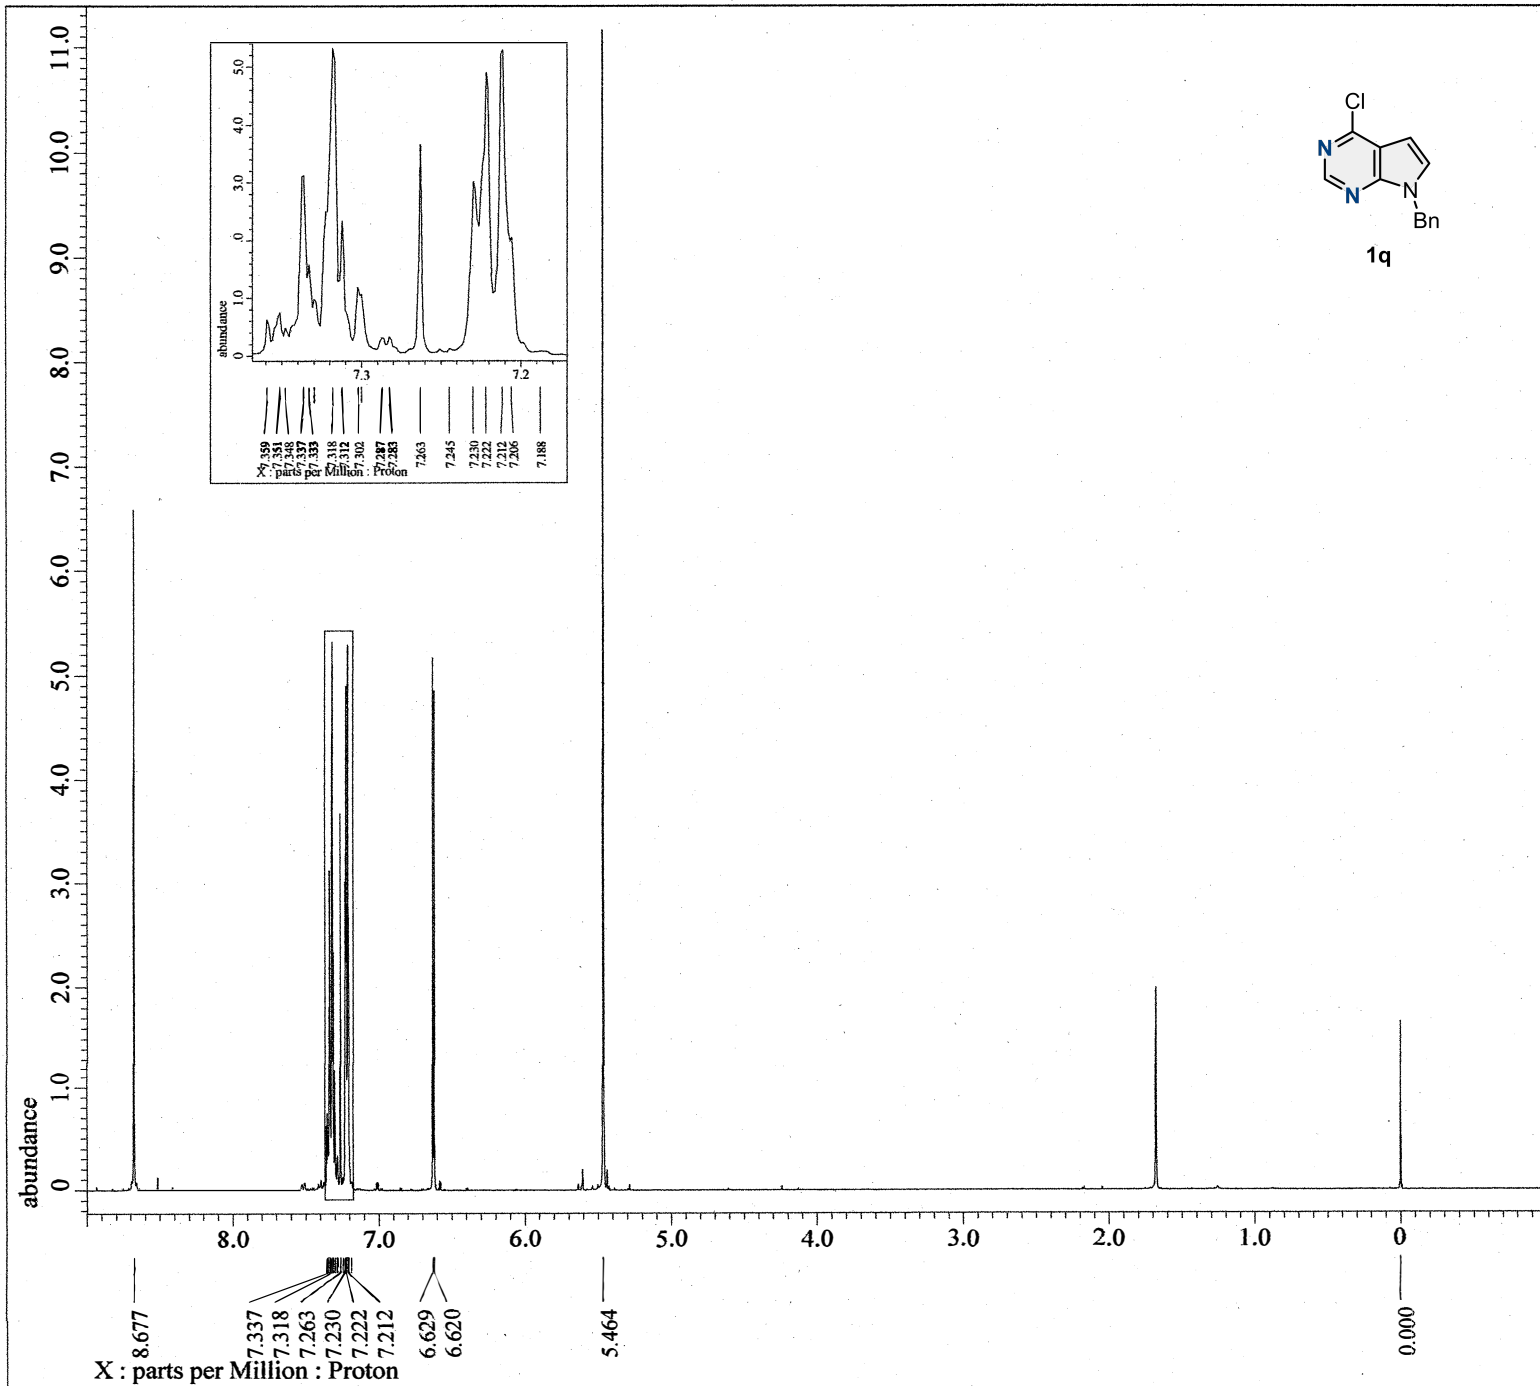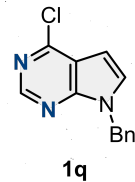

```

---- PROCESSING PARAMETERS ----
dc balance( 0, FALSE )
sexf( 0.2[Hz], 0.0[s] )
trapezoid( 0[%], 0[%], 80[%], 100[%] )
zerofill( 1, TRUE )
fft( 1, TRUE, TRUE )
machinephase
ppm

Derived from: MKN140-pure2 Proton-1-1.jdf

```

```

Filename      = MKN140-pure2_Proton-1-2.jdf
Author       = element
Experiment    = proton.jxp
Sample Id    = MKN140-pure2
Solvent      = CHLOROFORM-D
Actual_Start Time = 7-SEP-2023 13:04:21
Revision_Time = 15-JUN-2024 14:48:25

```

```

Comment      = single pulse
Data Format   = 1D COMPLEX
Dim_Size     = 13107
X_Domain     = Proton
Dim_Title    = Proton
Dim_Units    = [ppm]
Dimensions   = X
Spectrometer = DELTA2_NMR

```

```

Field Strength = 9.4073814[T] (400[MHz])
X_Acq_Duration = 2.18103808[s]
X_Domain       = 1H
X_Freq         = 400.53219825[MHz]
X_Offset       = 5[ppm]
X_Points       = 16384
X_Prescans     = 1
X_Resolution   = 0.45849727[Hz]
X_Sweep        = 7.51201923[kHz]
X_Sweep_Clipped = 6.00961538[kHz]
Irr_Domain     = Proton
Irr_Freq       = 400.53219825[MHz]
Irr_Offset     = 5[ppm]
Tri_Domain     = Proton
Tri_Freq       = 400.53219825[MHz]
Tri_Offset     = 5[ppm]
Clipped        = FALSE
Scans          = 8
Total_scans    = 8

```

```

Relaxation_Delay = 5[s]
Recvr_Gain       = 40
Temp_Get         = 19.5[dC]
X_90_Width       = 6.7[us]
X_Acq_Time       = 2.18103808[s]
X_Angle          = 45[deg]
X_Atn            = 0.8[dB]
X_Pulse          = 3.35[us]
Irr_Mode         = Off
Tri_Mode         = Off
Dante_Presat    = FALSE
Initial_Wait     = 1[s]
Repetition_Time = 7.18103808[s]

```

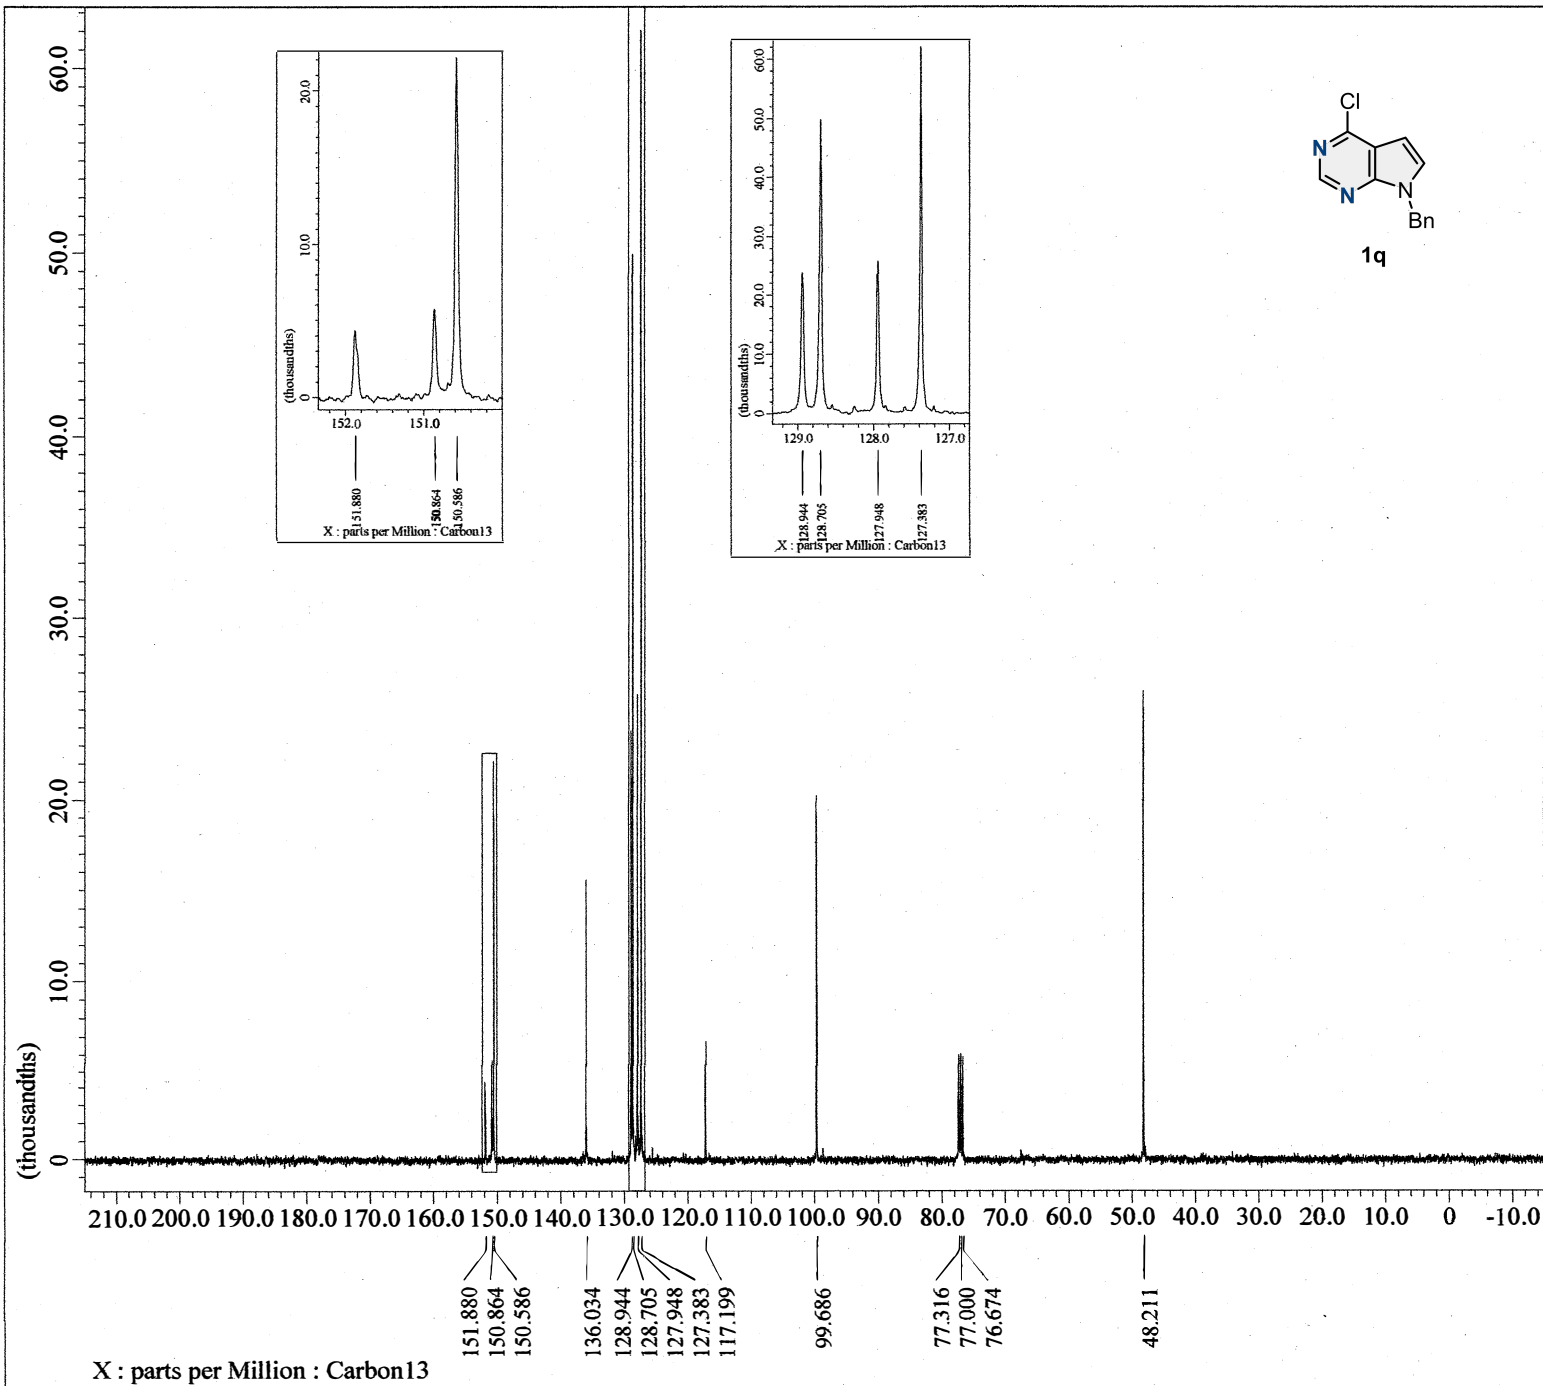

```

---- PROCESSING PARAMETERS ----
sexp( 2.0[Hz], 0.0[s] )
trapezoid( 0[%], 0[%], 80[%], 100[%] )
zerofill( 1, TRUE )
fft( 1, TRUE, TRUE )
machinephase
ppm

```

Derived from: MKN140-pure Carbon-1-1.jdf

```

Filename      = MKN140-pure_Carbon-
Author       = element
Experiment    = carbon_auto.jxp
Sample Id    = MKN140-pure
Solvent      = CHLOROFORM-D
Actual Start Time = 20-JAN-2024 16:56:5
Revision Time = 15-JUN-2024 15:04:5

```

```

Comment      = single pulse decoupl
Data Format   = 1D_COMPLEX
Dim Size     = 26214
X Domain     = Carbon13
Dim Title    = Carbon13
Dim Units    = [ppm]
Dimensions   = X
Spectrometer = DELTA2_NMR

```

```

Field Strength = 9.2982153[T] (400[M
X Acq Duration = 1.048576[s]
X Domain       = Carbon13
X Freq         = 99.54517646[MHz]
X Offset       = 100[ppm]
X Points       = 32768
X Prescans     = 4
X Resolution   = 0.95367432[Hz]
X Sweep        = 31.25[kHz]
X Sweep_Clippe = 25[kHz]
Irr_Domain     = Proton
Irr Freq       = 395.88430144[MHz]
Irr Offset     = 5[ppm]
Blanking       = 5.0[us]
Clipped        = FALSE
Scans          = 64
Total_Scans    = 64

```

```

Relaxation_Delay = 2[s]
Recvr Gain       = 50
Temp Get         = 18.7[dC]
X 90_Width       = 11.5[us]
X Acq Time       = 1.048576[s]
X Angle          = 30[deg]
X Atn            = 9[dB]
X Pulse          = 3.83333333[us]
Irr Atn Dec      = 30.172[dB]
Irr Atn Dec Calc = 30.172[dB]
Irr Atn Dec_Default_Calc = 30.172[dB]
Irr Atn Noe      = 30.172[dB]
Irr_Dec Bandwidth_Hz = 4.7826087[kHz]
Irr_Dec Bandwidth_Ppm = 12.08082432[ppm]
Irr_Dec Freq     = 395.88430144[MHz]
Irr_Dec Merit Factor = 2.2
Irr_Decoupling   = TRUE
Irr Noe          = TRUE

```

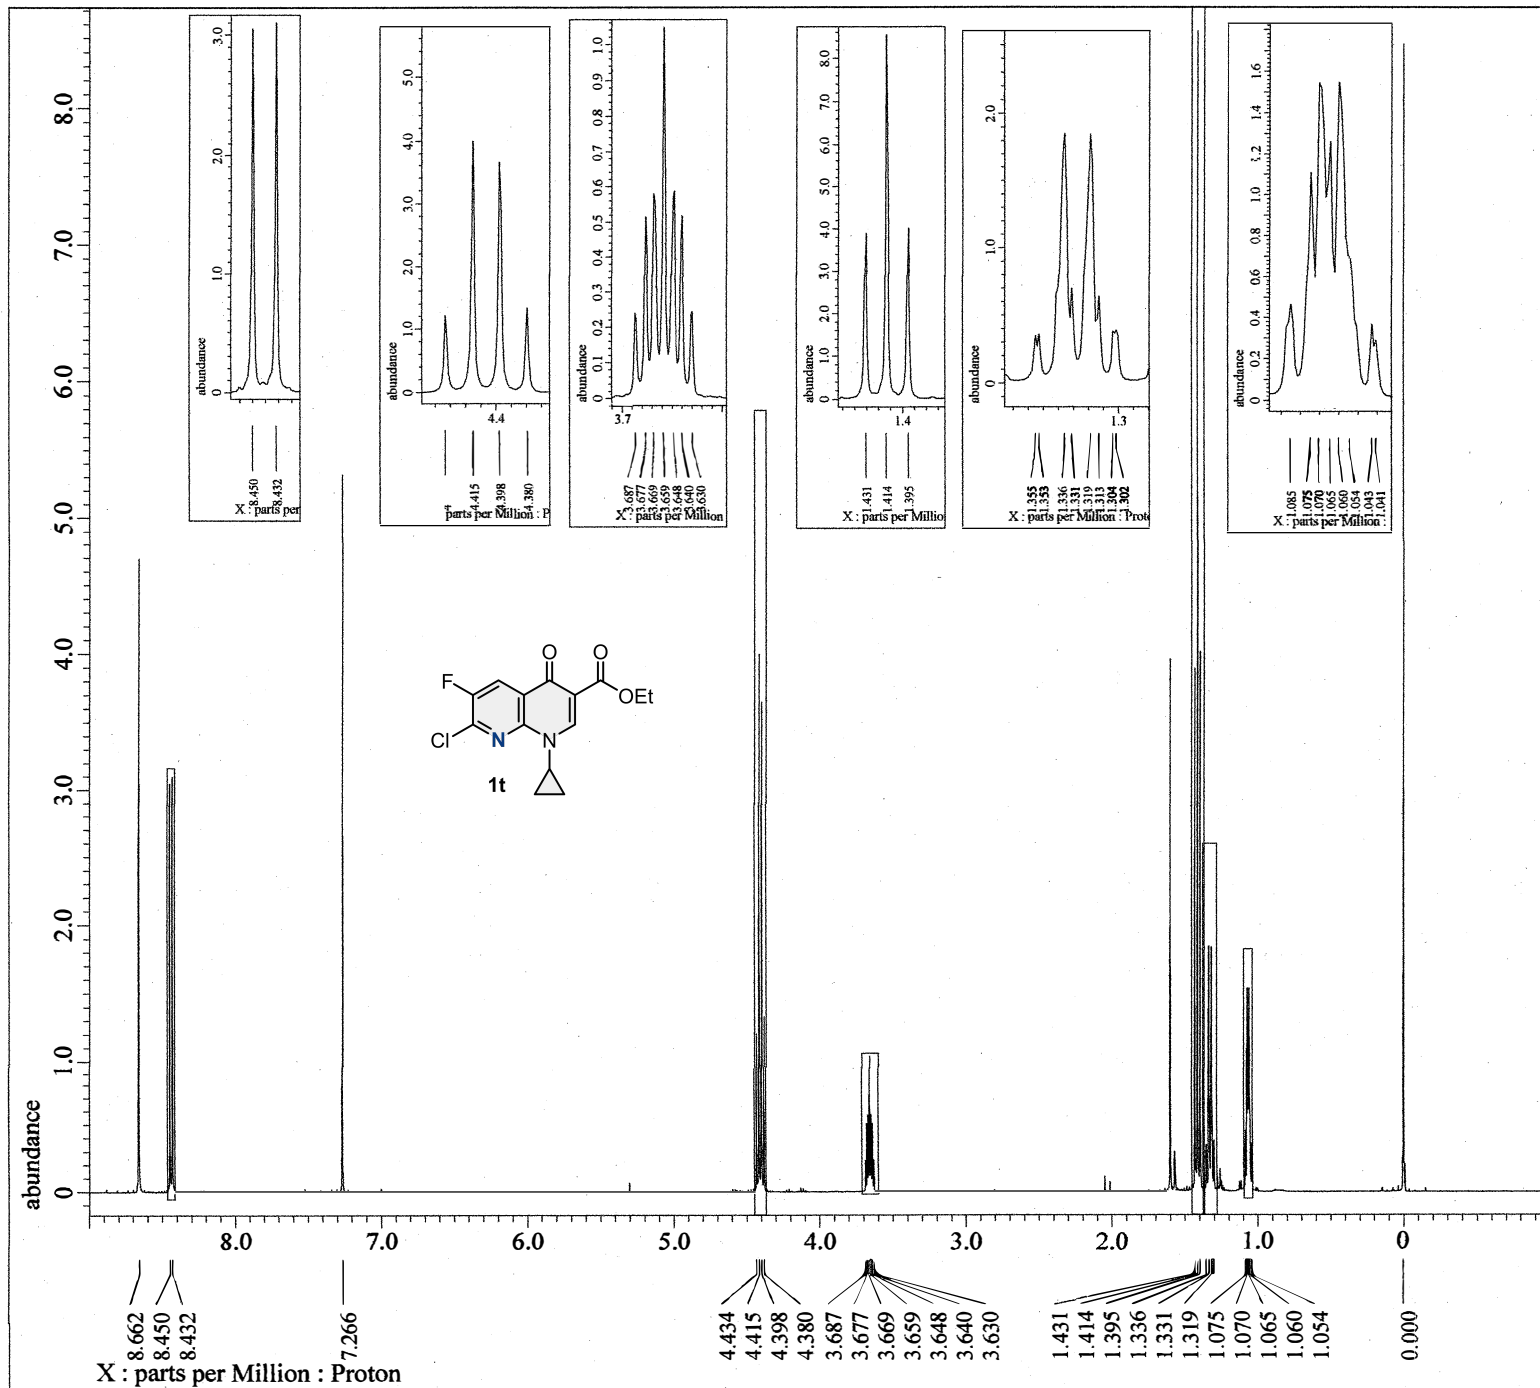

```

---- PROCESSING PARAMETERS ----
dc balance( 0, FALSE )
sexp( 0.2[Hz], 0.0[s] )
trapezoid( 0[%], 0[%], 80[%], 100[%] )
zerofill( 1, TRUE )
fft( 1, TRUE, TRUE )
machinephase
ppm

Derived from: MKN218-pure2 Proton-1-1.jdf

Filename      = MKN218-pure2_Proton-1-2.jd
Author       = element
Experiment   = proton.jxp
Sample Id    = MKN218-pure2
Solvent      = CHLOROFORM-D
Actual_Start Time = 16-NOV-2023 12:42:18
Revision_Time = 15-JUN-2024 15:13:57

Comment      = single pulse
Data Format   = 1D COMPLEX
Dim Size     = 13107
X Domain     = Proton
Dim Title    = Proton
Dim Units    = [ppm]
Dimensions   = X
Spectrometer = DELTA2_NMR

Field_Strength = 9.4073814[T] (400[MHz])
X_Acq_Duration = 2.18103808[s]
X_Domain       = 1H
X_Freq        = 400.53219825[MHz]
X_Offset      = 5[ppm]
X_Points      = 16384
X_Prescans    = 1
X_Resolution  = 0.45849727[Hz]
X_Sweep       = 7.51201923[kHz]
X_Sweep_Clippped = 6.00961538[kHz]
Irr_Domain    = Proton
Irr_Freq     = 400.53219825[MHz]
Irr_Offset   = 5[ppm]
Tri_Domain   = Proton
Tri_Freq    = 400.53219825[MHz]
Tri_Offset   = 5[ppm]
Clipped      = FALSE
Scans        = 8
Total_Scans  = 8

Relaxation_Delay = 5[s]
Recvr Gain       = 46
Temp_Get        = 19.7[dC]
X_90_Width     = 6.7[us]
X_Acq_Time     = 2.18103808[s]
X_Angle        = 45[deg]
X_Atn          = 0.8[dB]
X_Pulse        = 3.35[us]
Irr_Mode       = Off
Tri_Mode       = Off
Dante_Presat   = FALSE
Initial_Wait    = 1[s]
Repetition_Time = 7.18103808[s]

```

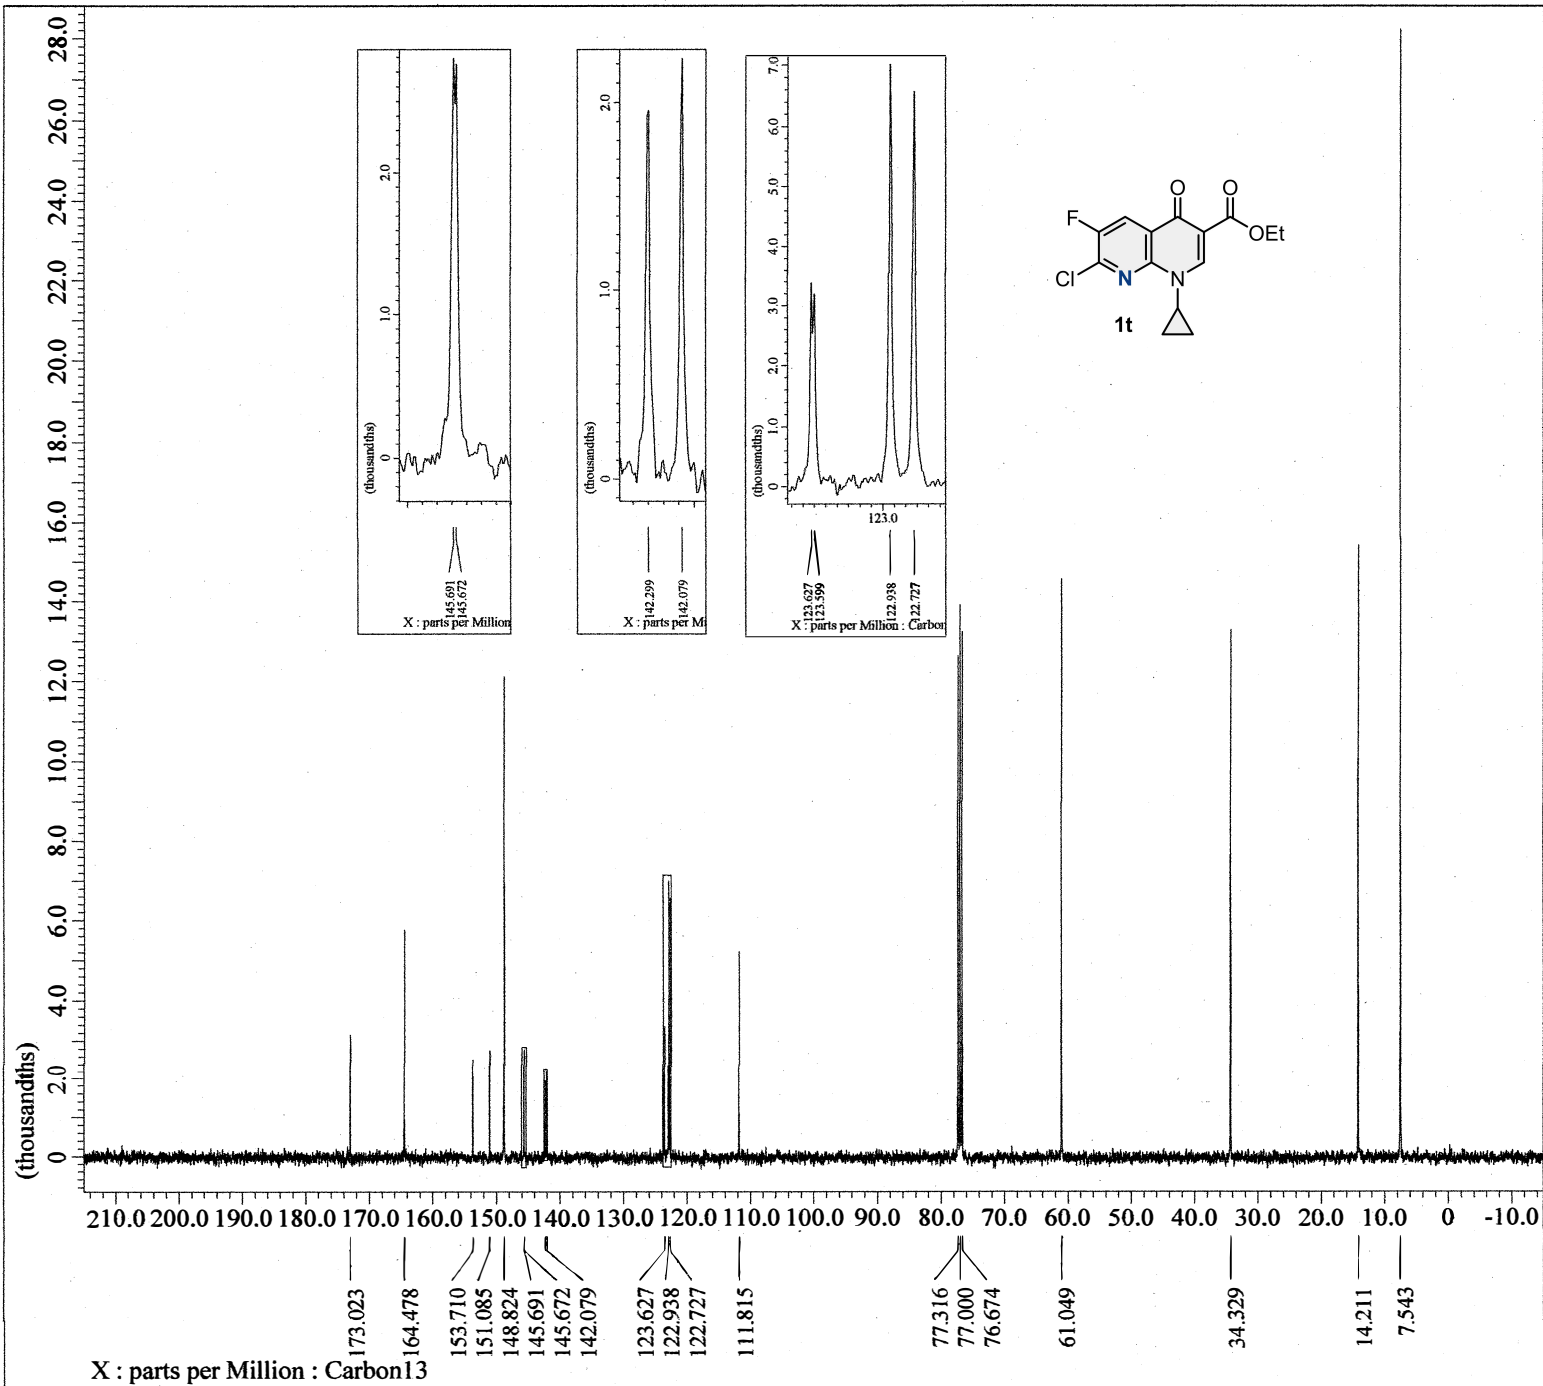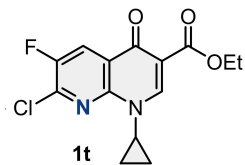

---- PROCESSING PARAMETERS ----  
 sexp( 2.0[Hz], 0.0[s] )  
 trapezoid( 0[%], 0[%], 80[%], 100[%] )  
 zerofill( 1, TRUE )  
 fft( 1, TRUE, TRUE )  
 machinephase  
 ppm

Derived from: MKN218-pure Carbon-1-1.jdf

Filename = MKN218-pure\_Carbon-  
 Author = element  
 Experiment = carbon\_auto.jxp  
 Sample Id = MKN218-pure  
 Solvent = CHLOROFORM-D  
 Actual\_Start\_Time = 20-JAN-2024 16:38:4  
 Revision\_Time = 15-JUN-2024 15:33:2

Comment = single pulse decoupl  
 Data\_Format = 1D COMPLEX  
 Dim\_Size = 26214  
 X\_Domain = Carbon13  
 Dim\_Title = Carbon13  
 Dim\_Units = [ppm]  
 Dimensions = X  
 Spectrometer = DELTA2\_NMR

Field\_Strength = 9.2982153[T] (400[M  
 X\_Acq\_Duration = 1.048576[s]  
 X\_Domain = Carbon13  
 X\_Freq = 99.54517646[MHz]  
 X\_Offset = 100[ppm]  
 X\_Points = 32768  
 X\_Prescans = 4  
 X\_Resolution = 0.95367432[Hz]  
 X\_Sweep = 31.25[kHz]  
 X\_Sweep\_Clipped = 25[kHz]  
 Irr\_Domain = Proton  
 Irr\_Freq = 395.88430144[MHz]  
 Irr\_Offset = 5[ppm]  
 Blanking = 5.0[us]  
 Clipped = FALSE  
 Scans = 128  
 Total\_Scans = 128

Relaxation\_Delay = 2[s]  
 Recvr\_Gain = 50  
 Temp\_Get = 18.7[dc]  
 X\_90\_Width = 11.5[us]  
 X\_Acq\_Time = 1.048576[s]  
 X\_Angle = 30[deg]  
 X\_Atn = 9[dB]  
 X\_Pulse = 3.83333333[us]  
 Irr\_Atn\_Dec = 30.172[dB]  
 Irr\_Atn\_Dec\_Calc = 30.172[dB]  
 Irr\_Atn\_Dec\_Default\_Calc = 30.172[dB]  
 Irr\_Atn\_No = 30.172[dB]  
 Irr\_Dec\_Bandwidth\_Hz = 4.7826087[kHz]  
 Irr\_Dec\_Bandwidth\_Ppm = 12.08082432[ppm]  
 Irr\_Dec\_Freq = 395.88430144[MHz]  
 Irr\_Dec\_Merit\_Factor = 2.2  
 Irr\_Decoupling = TRUE  
 Irr\_No = TRUE

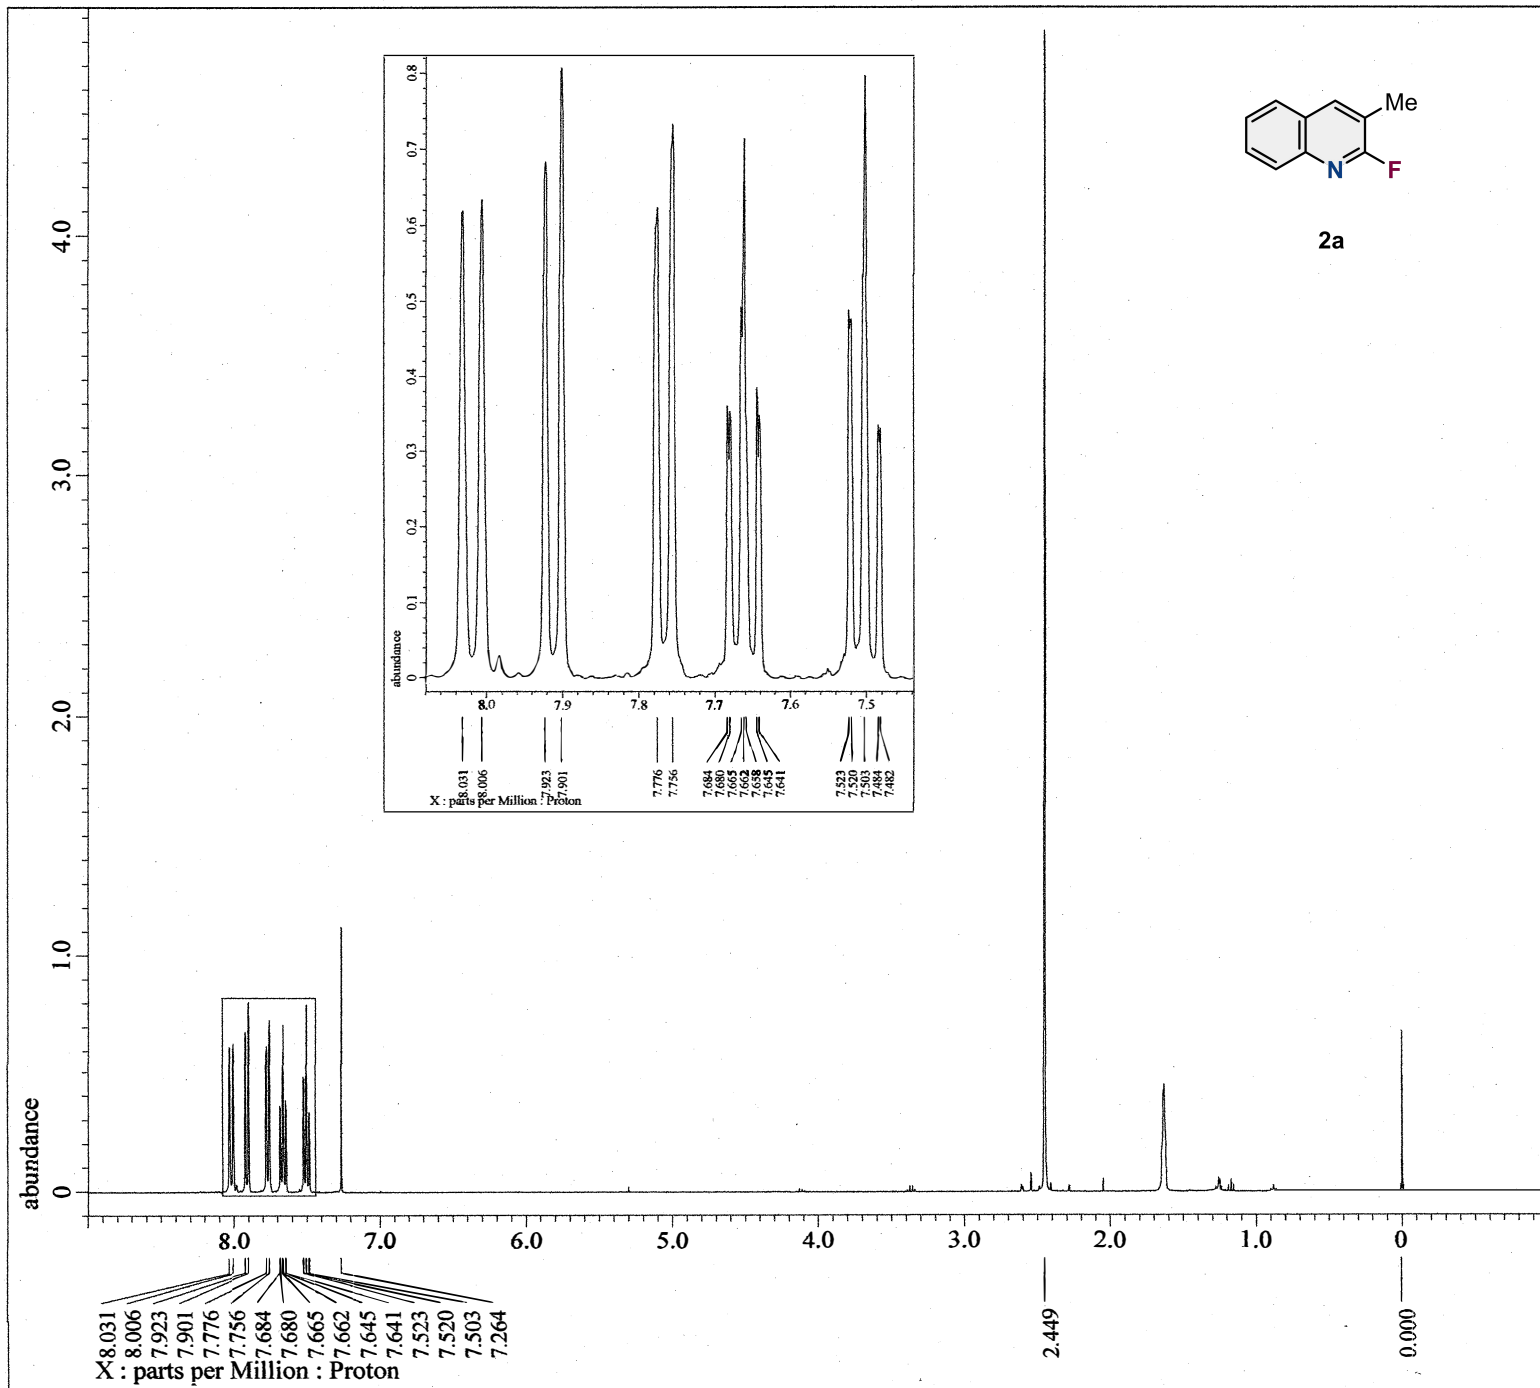

```

---- PROCESSING PARAMETERS ----
sexp( 0.2[Hz], 0.0[s] )
trapezoid( 0[%], 0[%], 80[%], 100[%] )
zerofill( 1, TRUE )
fft( 1, TRUE, TRUE )
machinephase
ppm
Derived from: MKN189-pure2 Proton-1-1.jdf

```

```

Filename           = MKN189-pure2_Proton-1-
Author             = element
Experiment          = proton_auto.jxp
Sample Id          = MKN189-pure2
Solvent            = CHLOROFORM-D
Actual Start Time  = 2-OCT-2023 14:48:28
Revision Time      = 15-JUN-2024 11:12:55

```

```

Comment           = single_pulse
Data Format        = 1D_COMPLEX
Dim Size          = 13107
X_Domain          = Proton
Dim Title         = Proton
Dim Units         = [ppm]
Dimensions        = X
Spectrometer      = DELTA2_NMR

```

```

Field Strength    = 9.2982153[T] (400[MHz])
X_Acq_Duration    = 2.20725248[s]
X_Domain          = Proton
X_Freq            = 395.88430144[MHz]
X_Offset          = 5[ppm]
X_Points          = 16384
X_Prescans        = 1
X_Resolution      = 0.45305193[Hz]
X_Sweep           = 7.42280285[kHz]
X_Sweep_Clipped  = 5.93824228[kHz]
Irr_Domain        = Proton
Irr_Freq          = 395.88430144[MHz]
Irr_Offset        = 5[ppm]
Tri_Domain        = Proton
Tri_Freq          = 395.88430144[MHz]
Tri_Offset        = 5[ppm]
Blanking          = 2.0[us]
Clipped           = FALSE
Scans             = 8
Total_Scans       = 8

```

```

Relaxation_Delay  = 5[s]
Recvr_Gain        = 56
Temp_Get          = 18.2[dC]
X_90_Width        = 6.34[us]
X_Acq_Time        = 2.20725248[s]
X_Angle           = 45[deg]
X_Atn             = 5[dB]
X_Pulse           = 3.17[us]
Irr_Mode          = Off
Tri_Mode          = Off
Dante_Loop        = 500
Dante_Presat      = FALSE
Decimation_Rate   = 0
Initial_Wait      = 1[s]
Phase             = {0, 90, 270, 180, 180,

```

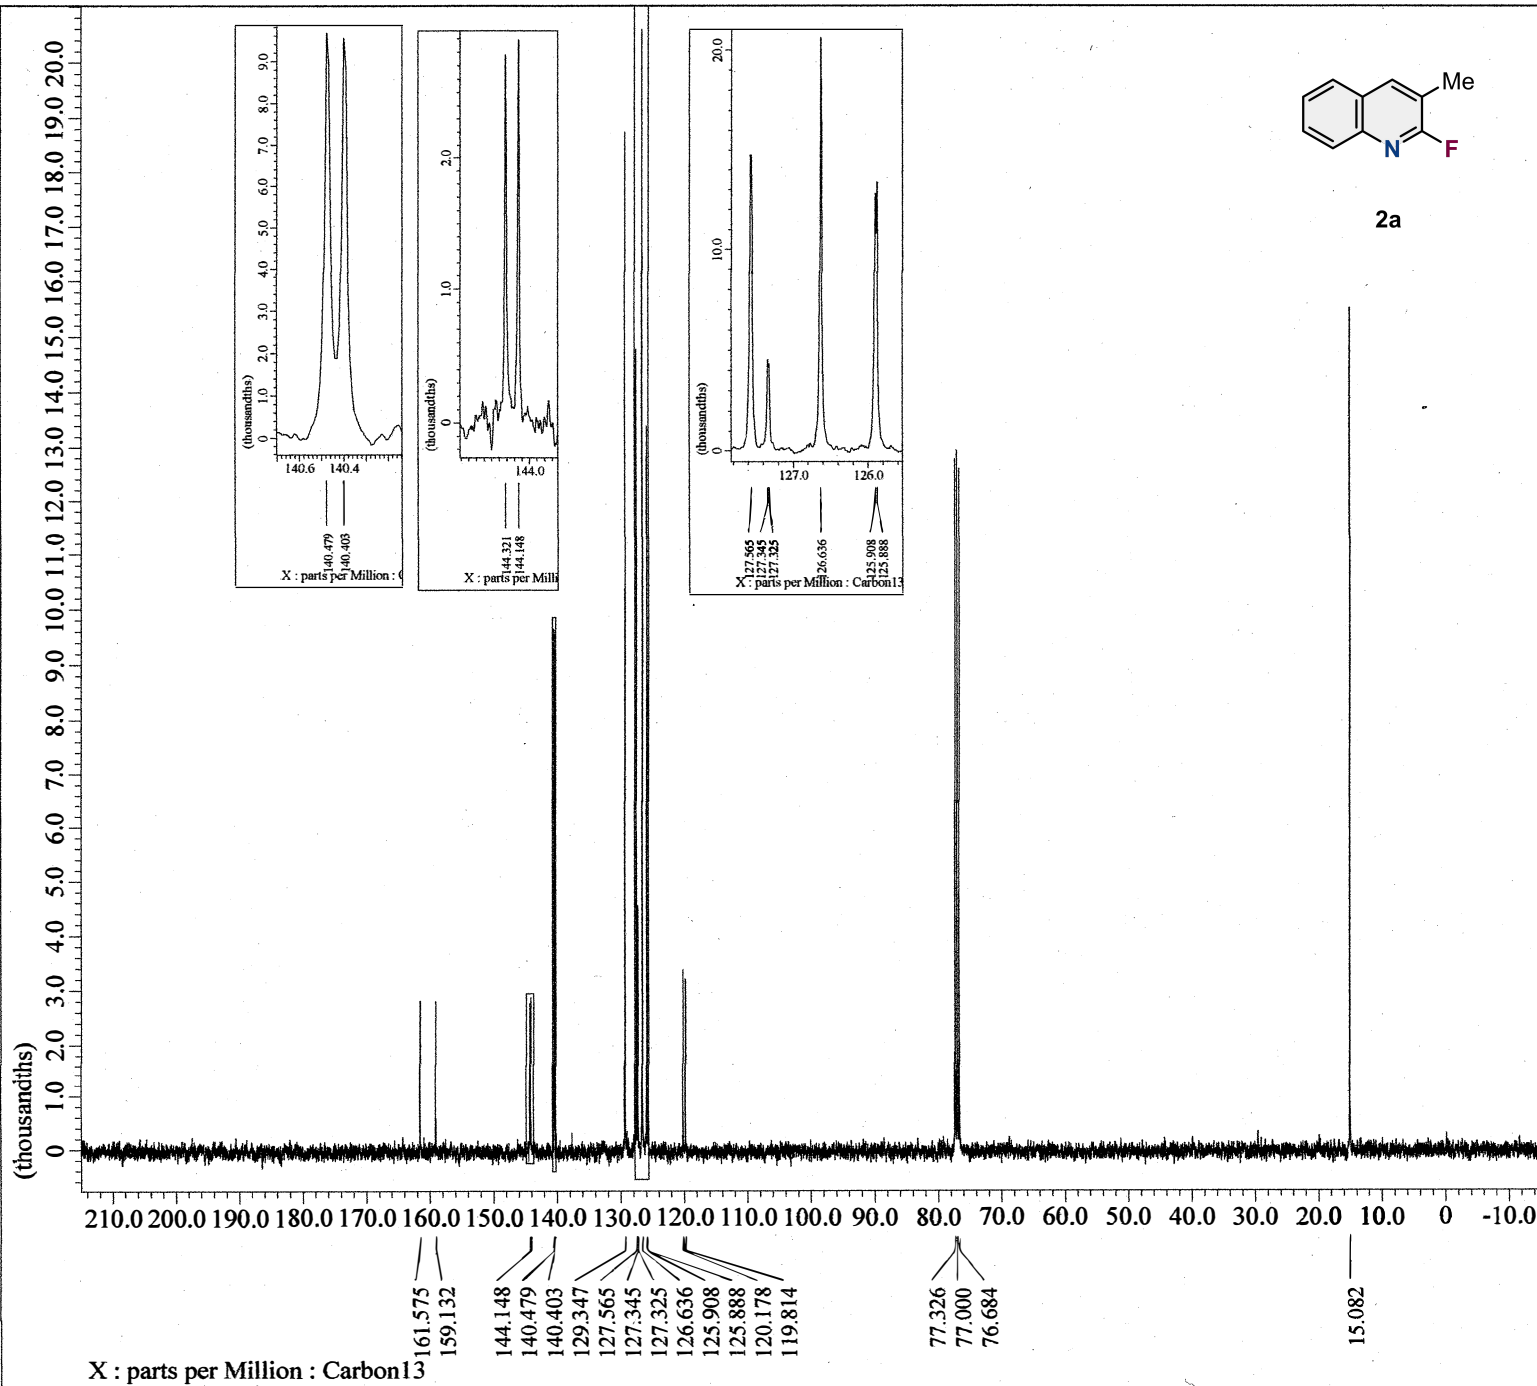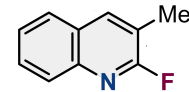

2a

```

---- PROCESSING PARAMETERS ----
sexp( 2.0[Hz], 0.0[s] )
trapezoid( 0[%], 0[%], 80[%], 100[%] )
zerofill( 1, TRUE )
fft( 1, TRUE, TRUE )
machinephase
ppm

```

Derived from: MKN189-pure2 Carbon-1-1.jdf

```

Filename           = MKN189-pure2_Carbon
Author             = element
Experiment         = carbon_auto.jxp
Sample Id         = MKN189-pure2
Solvent           = CHLOROFORM-D
Actual Start Time = 13-OCT-2023 17:43:0
Revision Time     = 15-JUN-2024 12:04:2

```

```

Comment           = single pulse decoupl
Data Format       = 1D COMPLEX
Dim Size         = 26214
X Domain         = Carbon13
Dim Title        = Carbon13
Dim Units        = [ppm]
Dimensions       = X
Spectrometer     = DELTA2_NMR

```

```

Field Strength   = 9.2982153[T] (400[M
X_Acq_Duration   = 1.048576[s]
X_Domain         = Carbon13
X_Freq           = 99.54517646[MHz]
X_Offset         = 100[ppm]
X_Points         = 32768
X_Prescans       = 4
X_Resolution     = 0.95367432[Hz]
X_Sweep          = 31.25[kHz]
X_Sweep_Clipped = 25[kHz]
Irr_Domain       = Proton
Irr_Freq         = 395.88430144[MHz]
Irr_Offset       = 5[ppm]
Blanking         = 5.0[us]
Clipped          = FALSE
Scans            = 128
Total_Scans      = 128

```

```

Relaxation Delay = 2[s]
Recvr Gain       = 50
Temp_Get         = 17.4[dc]
X_90_Width       = 11.5[us]
X_Acq_Time       = 1.048576[s]
X_Angle          = 30[deg]
X_Atn            = 9[dB]
X_Pulse          = 3.83333333[us]
Irr_Atn_Dec      = 30.172[dB]
Irr_Atn_Dec_Calc = 30.172[dB]
Irr_Atn_Dec_Default_Calc = 30.172[dB]
Irr_Atn_Noise    = 30.172[dB]
Irr_Dec_Bandwidth_Hz = 4.7826087[kHz]
Irr_Dec_Bandwidth_Ppm = 12.08082432[ppm]
Irr_Dec_Freq     = 395.88430144[MHz]
Irr_Dec_Merit_Factor = 2.2
Irr_Decoupling   = TRUE
Irr_Noise        = TRUE

```



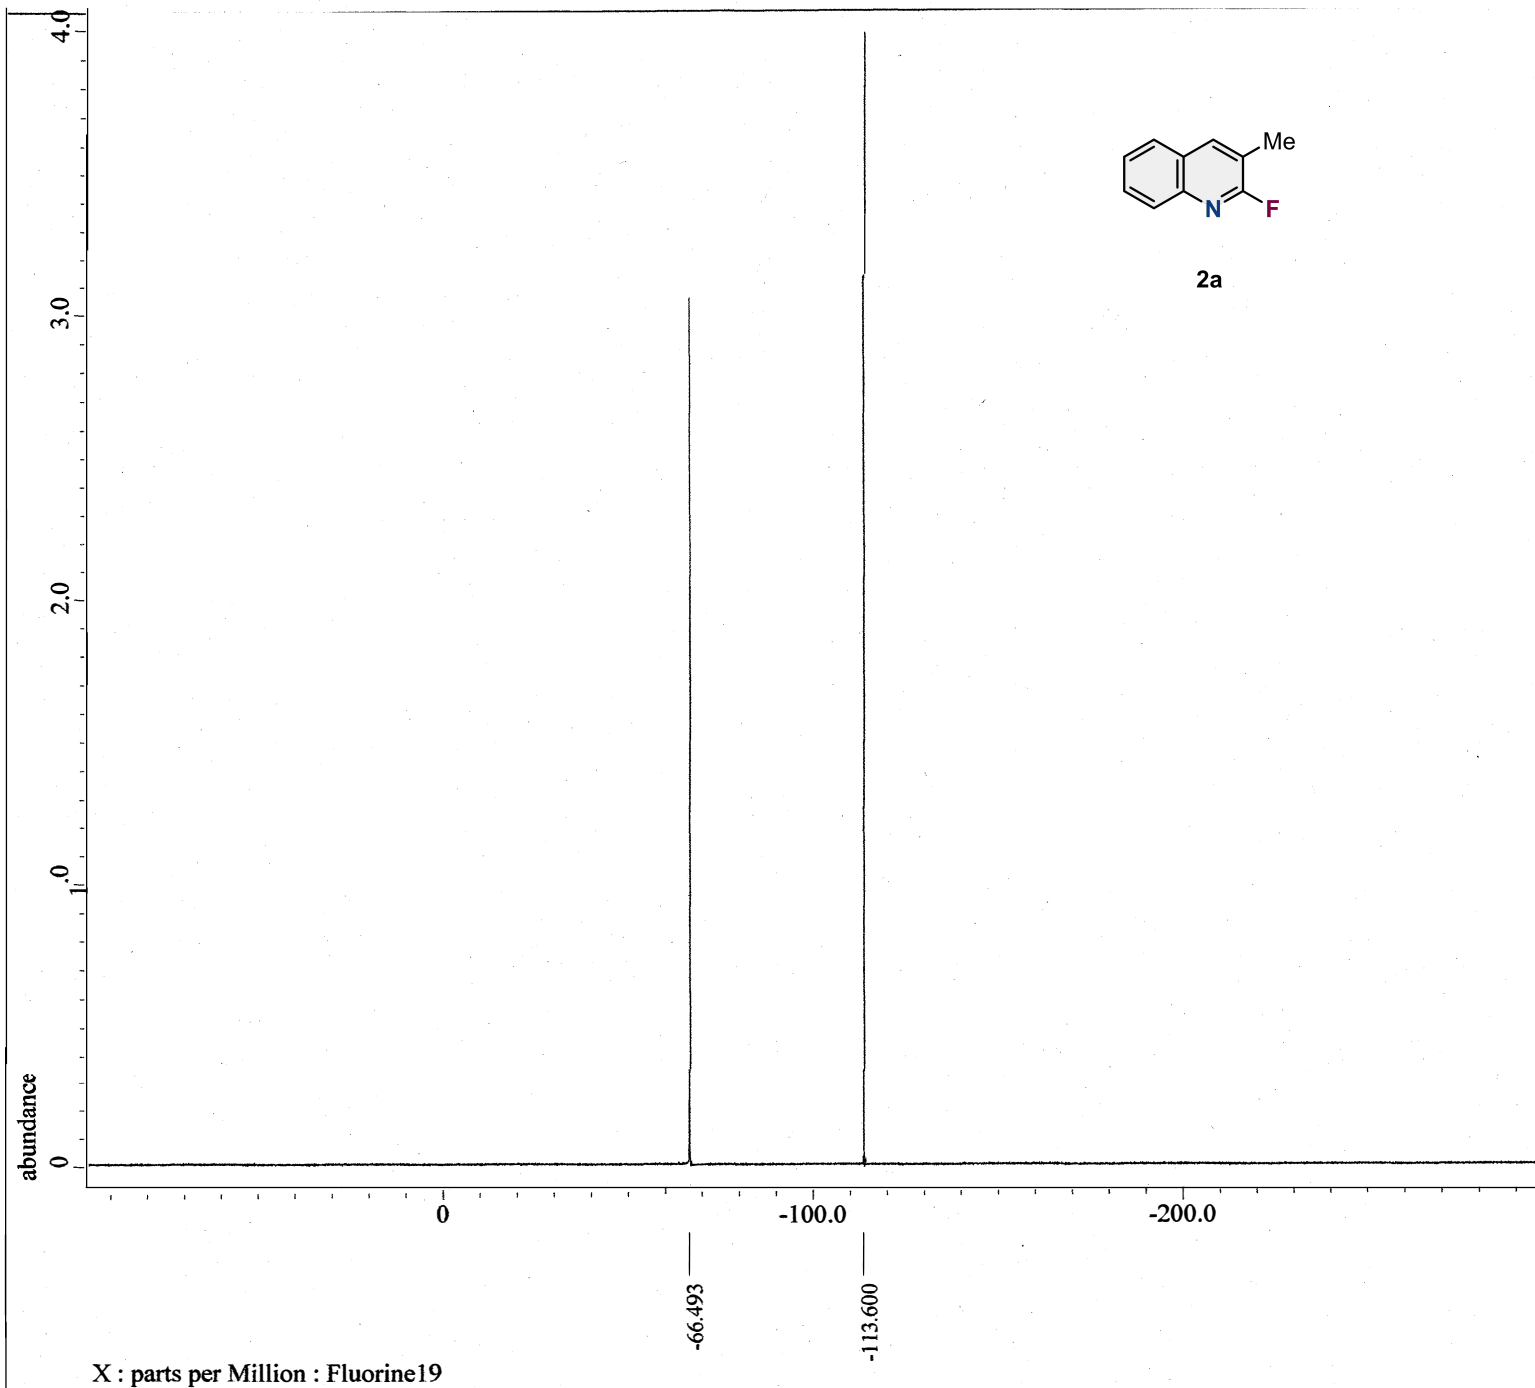

```

---- PROCESSING PARAMETERS ----
sexp( 0.2[Hz], 0.0[s] )
trapezoid( 0[%], 0[%], 80[%], 100[%] )
zerofill( 1 )
blip( 16, 64, 30 )
fft( 1, TRUE, TRUE )
machinephase
ppm

```

```

Filename           = MKN189-pure2_int_singl
Author             = element
Experiment          = single_pulse.jsp
Sample Id          = MKN189-pure2_int
Solvent             = CHLOROFORM-D
Actual Start Time  = 14-OCT-2023 11:09:07
Revision Time      = 24-JAN-2024 11:39:29

```

```

Comment           = single pulse
Data Format        = 1D COMPLEX
Dim Size          = 13107
X Domain          = Fluorine19
Dim Title         = Fluorine19
Dim Units         = [ppm]
Dimensions        = X
Spectrometer      = DELTA2_NMR

```

```

Field Strength    = 9.2982153[T] (400[MHz])
X Acq_Duration    = 89.12896[ms]
X Domain          = Fluorine19
X Freq            = 372.50336686[MHz]
X Offset          = -100[ppm]
X Points          = 16384
X Prescans        = 1
X Resolution      = 11.21969784[ Hz]
X Sweep           = 183.82352941[kHz]
X Sweep_Clippped = 147.05882353[kHz]
Irr_Domain        = Fluorine19
Irr Freq          = 372.50336686[MHz]
Irr_Offset        = 5[ppm]
Tri_Domain        = Fluorine19
Tri_Freq          = 372.50336686[MHz]
Tri_Offset        = 5[ppm]
Blanking          = 2.0[us]
Clipped           = FALSE
scans             = 8
Total_Scans       = 8

```

```

Relaxation_Delay  = 5[s]
Recvr Gain        = 56
Temp_Get          = 18.9[dc]
X_90_Width        = 8.03[us]
X_Acq_Time        = 89.12896[ms]
X_Angle           = 45[deg]
X Atn             = 5[dB]
X Pulse           = 4.015[us]
Irr_Mode          = Off
Tri_Mode          = Off
Dante_Loop        = 500
Dante_Presat      = FALSE
Decimation Rate   = 0
Initial_Wait      = 1[s]
Phase             = {0, 90, 270, 180, 180,

```

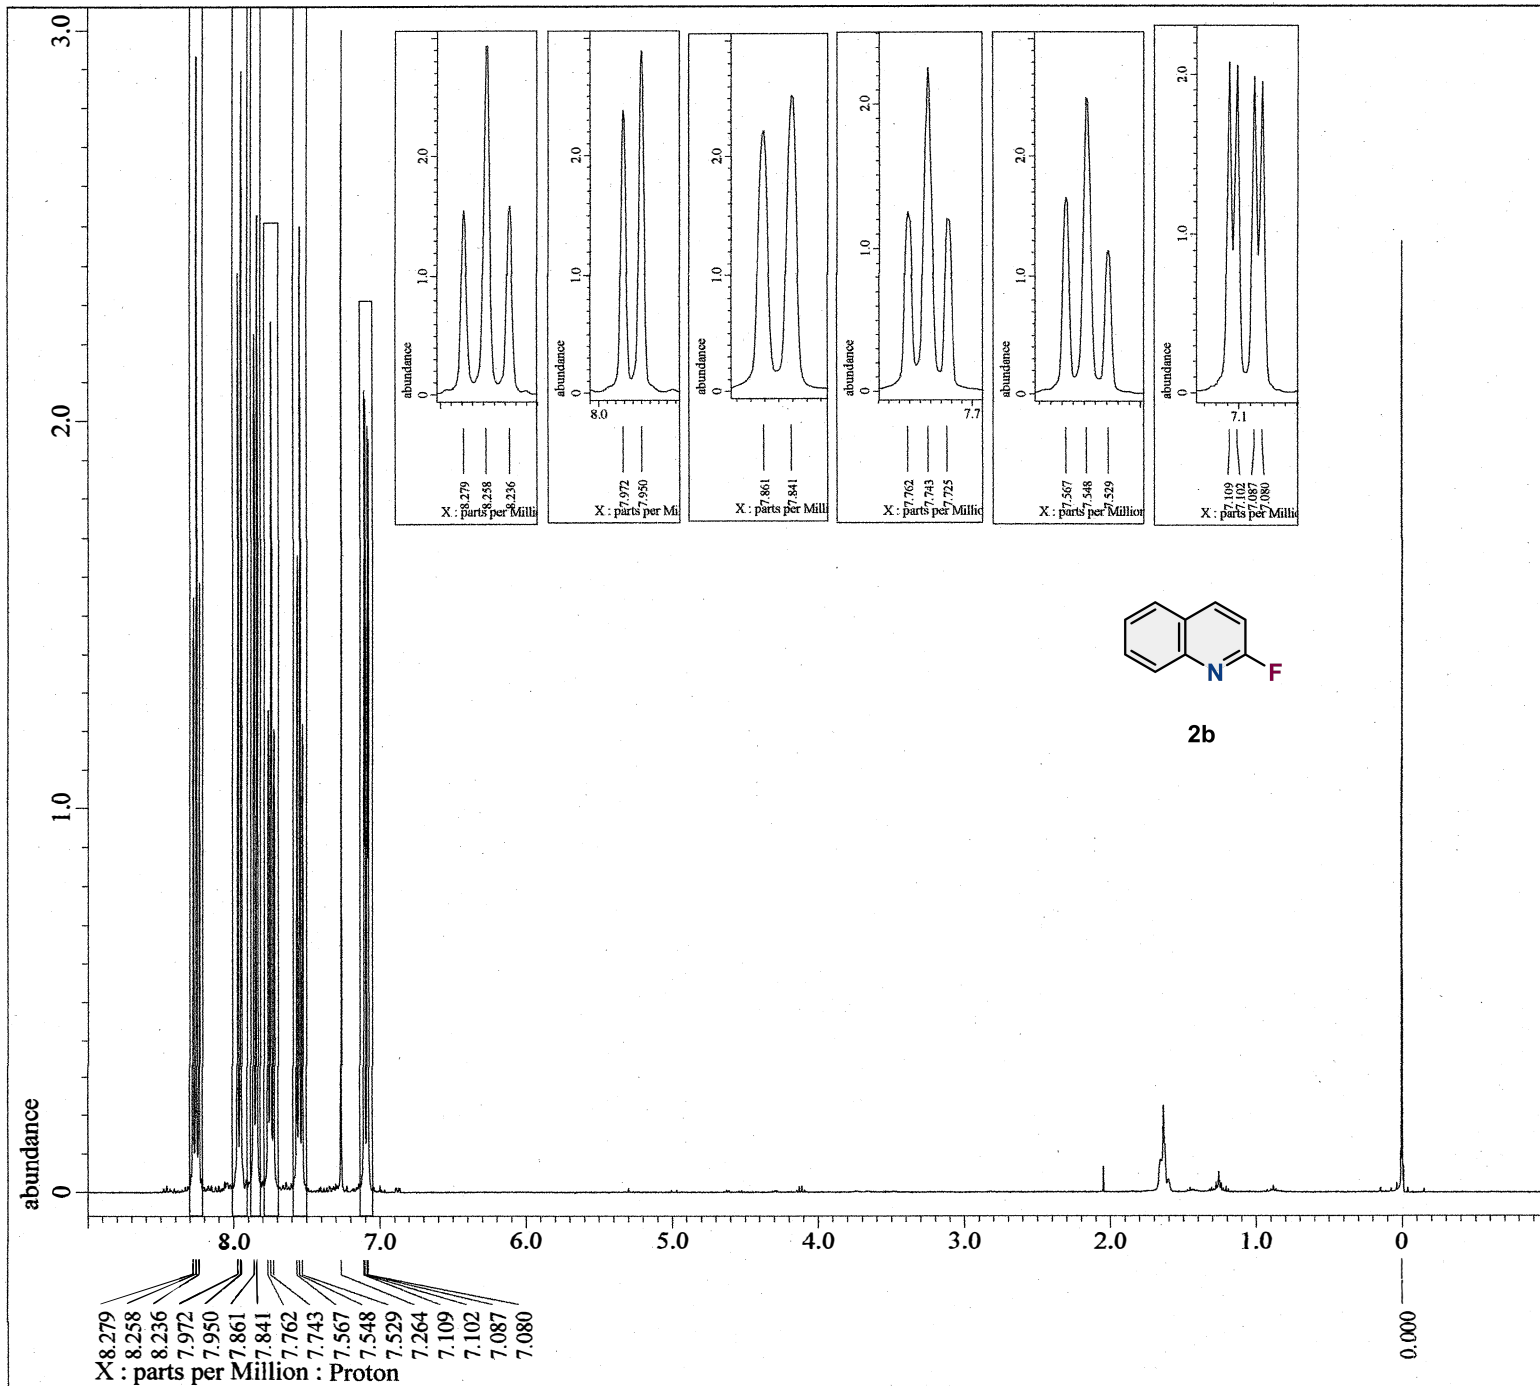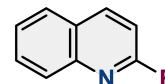

2b

---- PROCESSING PARAMETERS ----  
 dc balance( 0, FALSE )  
 sexp( 0.2[Hz], 0.0[s] )  
 trapezoid( 0[%], 0[%], 80[%], 100[%] )  
 zerofill( 1, TRUE )  
 fft( 1, TRUE, TRUE )  
 machinephase  
 ppm

Derived from: MKN307-pure Proton-1-1.jdf

Filename = MKN307-pure\_Proton-1-2.jdf  
 Author = element  
 Experiment = proton.jxp  
 Sample Id = MKN307-pure  
 Solvent = CHLOROFORM-D  
 Actual\_Start Time = 27-FEB-2024 10:07:26  
 Revision\_Time = 17-JUN-2024 13:15:45

Comment = single pulse  
 Data Format = 1D COMPLEX  
 Dim Size = 13107  
 X\_Domain = Proton  
 Dim Title = Proton  
 Dim Units = [ppm]  
 Dimensions = X  
 Spectrometer = DELTA2\_NMR

Field Strength = 9.4073814[T] (400[MHz])  
 X\_Acq\_Duration = 2.18103808[s]  
 X\_Domain = 1H  
 X\_Freq = 400.53219825[MHz]  
 X\_Offset = 5[ppm]  
 X\_Points = 16384  
 X\_Prescans = 1  
 X\_Resolution = 0.45849727[Hz]  
 X\_Sweep = 7.51201923[kHz]  
 X\_Sweep\_Clippped = 6.00961538[kHz]  
 Iir\_Domain = Proton  
 Irr\_Freq = 400.53219825[MHz]  
 Irr\_Offset = 5[ppm]  
 Tri\_Domain = Proton  
 Tri\_Freq = 400.53219825[MHz]  
 Tri\_Offset = 5[ppm]  
 Clipped = FALSE  
 Scans = 8  
 Total\_Scans = 8

Relaxation\_Delay = 5[s]  
 Recvr Gain = 40  
 Temp Get = 19.6[dC]  
 X\_90\_Width = 6.7[us]  
 X\_Acq\_Time = 2.18103808[s]  
 X\_Angle = 45[deg]  
 X\_Atn = 0.8[dB]  
 X\_Pulse = 3.35[us]  
 Iir\_Mode = Off  
 Tri\_Mode = Off  
 DanE\_Presat = FALSE  
 Initial Wait = 1[s]  
 Repetition Time = 7.18103808[s]

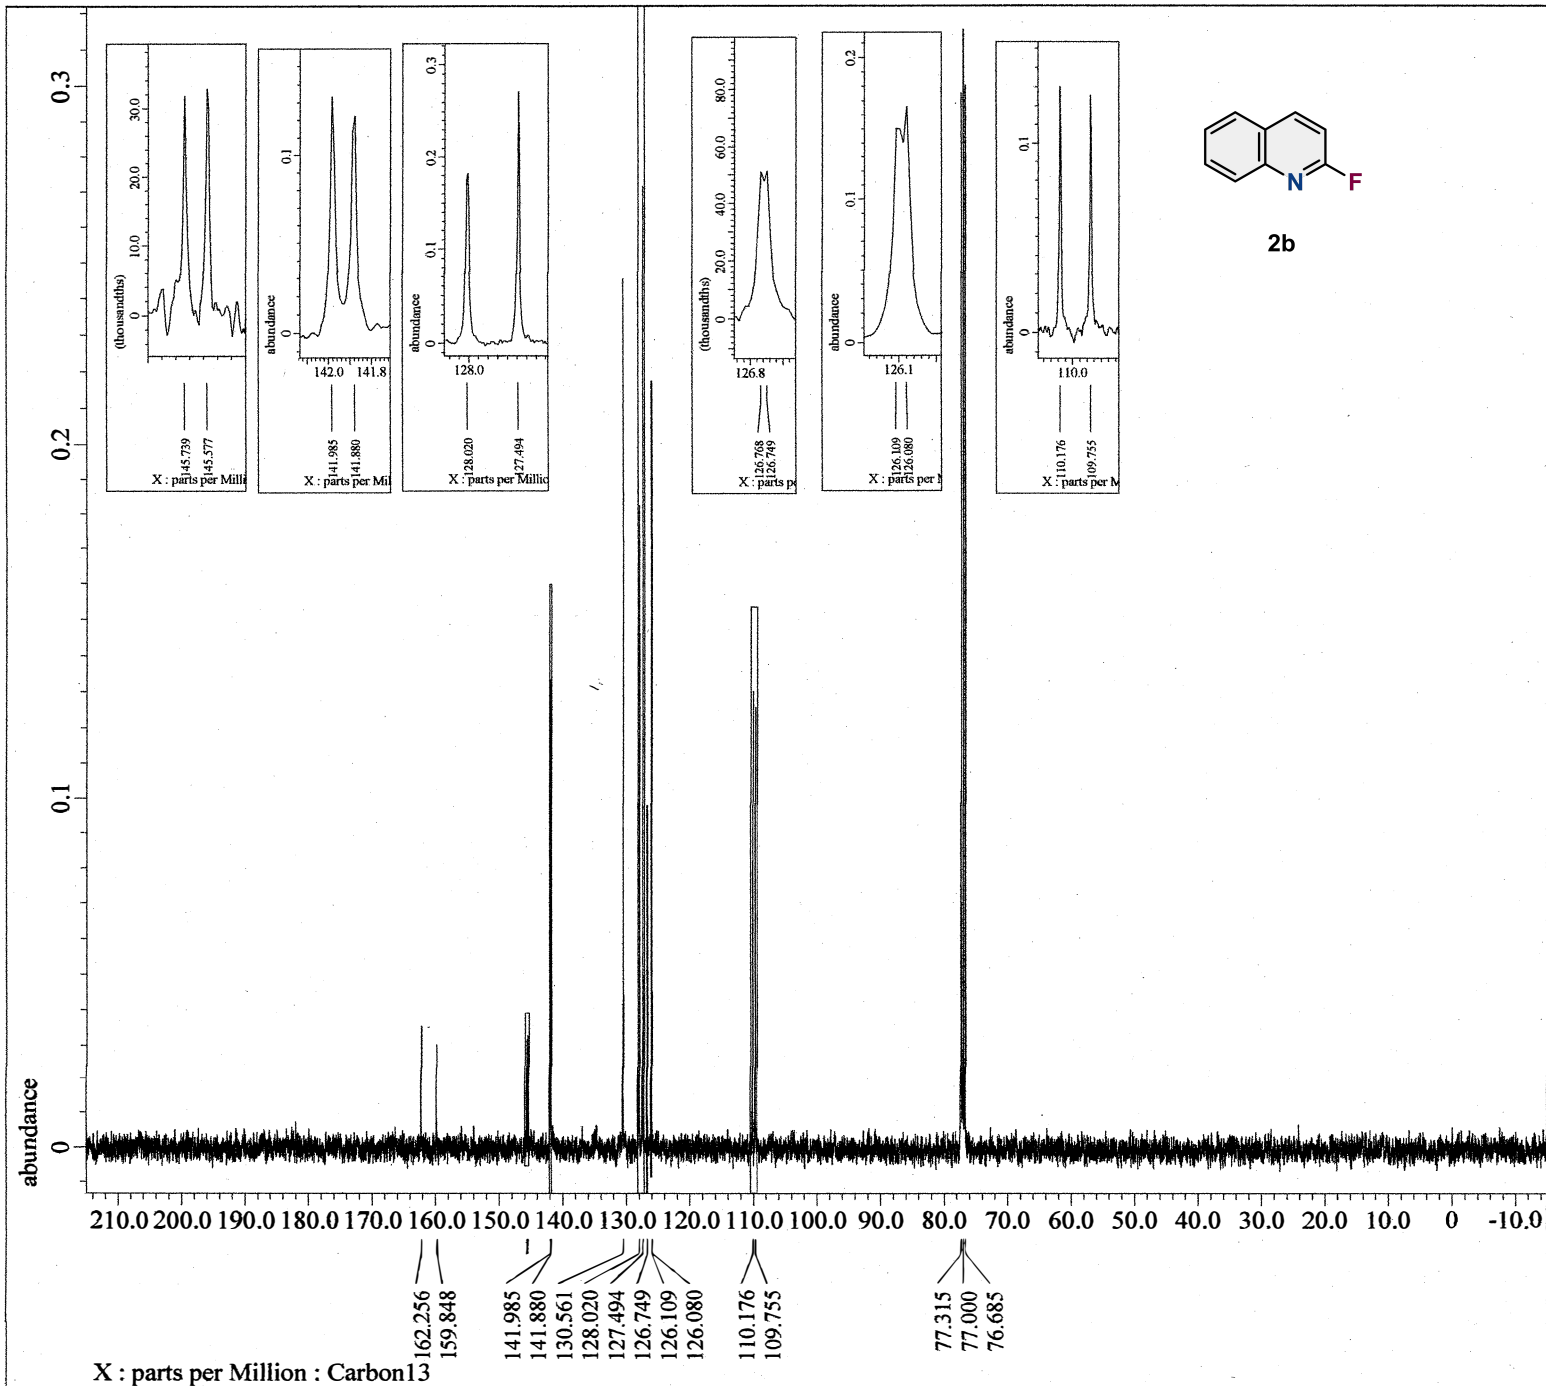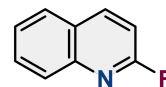

2b

---- PROCESSING PARAMETERS ----  
 dc balance( 0, FALSE )  
 sexp( 2.0[Hz], 0.0[s] )  
 trapezoid( 0[%], 0[%], 80[%], 100[%] )  
 zerofill( 1, TRUE )  
 fft( 1, TRUE, TRUE )  
 machinephase  
 ppm

Derived from: MKN307-pure Carbon-1-1.jdf

Filename = MKN307-pure\_Carbon-1-3.jdf  
 Author = element  
 Experiment = carbon.jxp  
 Sample Id = MKN307-pure  
 Solvent = CHLOROFORM-D  
 Actual Start Time = 27-FEB-2024 11:08:31  
 Revision\_Time = 17-JUN-2024 13:30:42

Comment = single pulse decoupled gat  
 Data Format = 1D COMPLEX  
 Dim Size = 26214  
 X Domain = Carbon  
 Dim Title = Carbon13  
 Dim Units = [ppm]  
 Dimensions = X  
 Site = JNM-ECS400  
 Spectrometer = DELTA2\_NMR

Field Strength = 9.37221[T] (400[MHz])  
 X\_Acq\_Duration = 1.04333312[s]  
 X\_Domain = 13C  
 X\_Freq = 100.33735165[MHz]  
 X\_Offset = 100.0[ppm]  
 X\_Points = 32768  
 X\_Prescans = 4  
 X\_Resolution = 0.95846665[Hz]  
 X\_Sweep = 31.40703518[kHz]  
 X\_Sweep\_Clipped = 25.12562814[kHz]  
 Irr\_Domain = Proton  
 Irr\_Freq = 399.03472754[MHz]  
 Irr\_Offset = 5.0[ppm]  
 Clipped = FALSE  
 Scans = 128  
 Total\_Scans = 128

Relaxation\_Delay = 2[s]  
 Recvr\_Gain = 50  
 Temp\_Get = 18.6[dc]  
 X\_90\_Width = 10.9[us]  
 X\_Acq\_Time = 1.04333312[s]  
 X\_Angle = 30[deg]  
 X\_Atn = 5.4[db]  
 X\_Pulse = 3.63333333[us]  
 Irr\_Atn\_Dec = 25.823[db]  
 Irr\_Atn\_Noise = 25.823[db]  
 Irr\_Noise = WALTZ  
 Irr\_Pwidth = 0.115[ms]  
 Decoupling = TRUE  
 Initial\_Wait = 1[s]  
 Noe = TRUE  
 Noe\_Time = 2[s]  
 Repetition\_Time = 3.04333312[s]

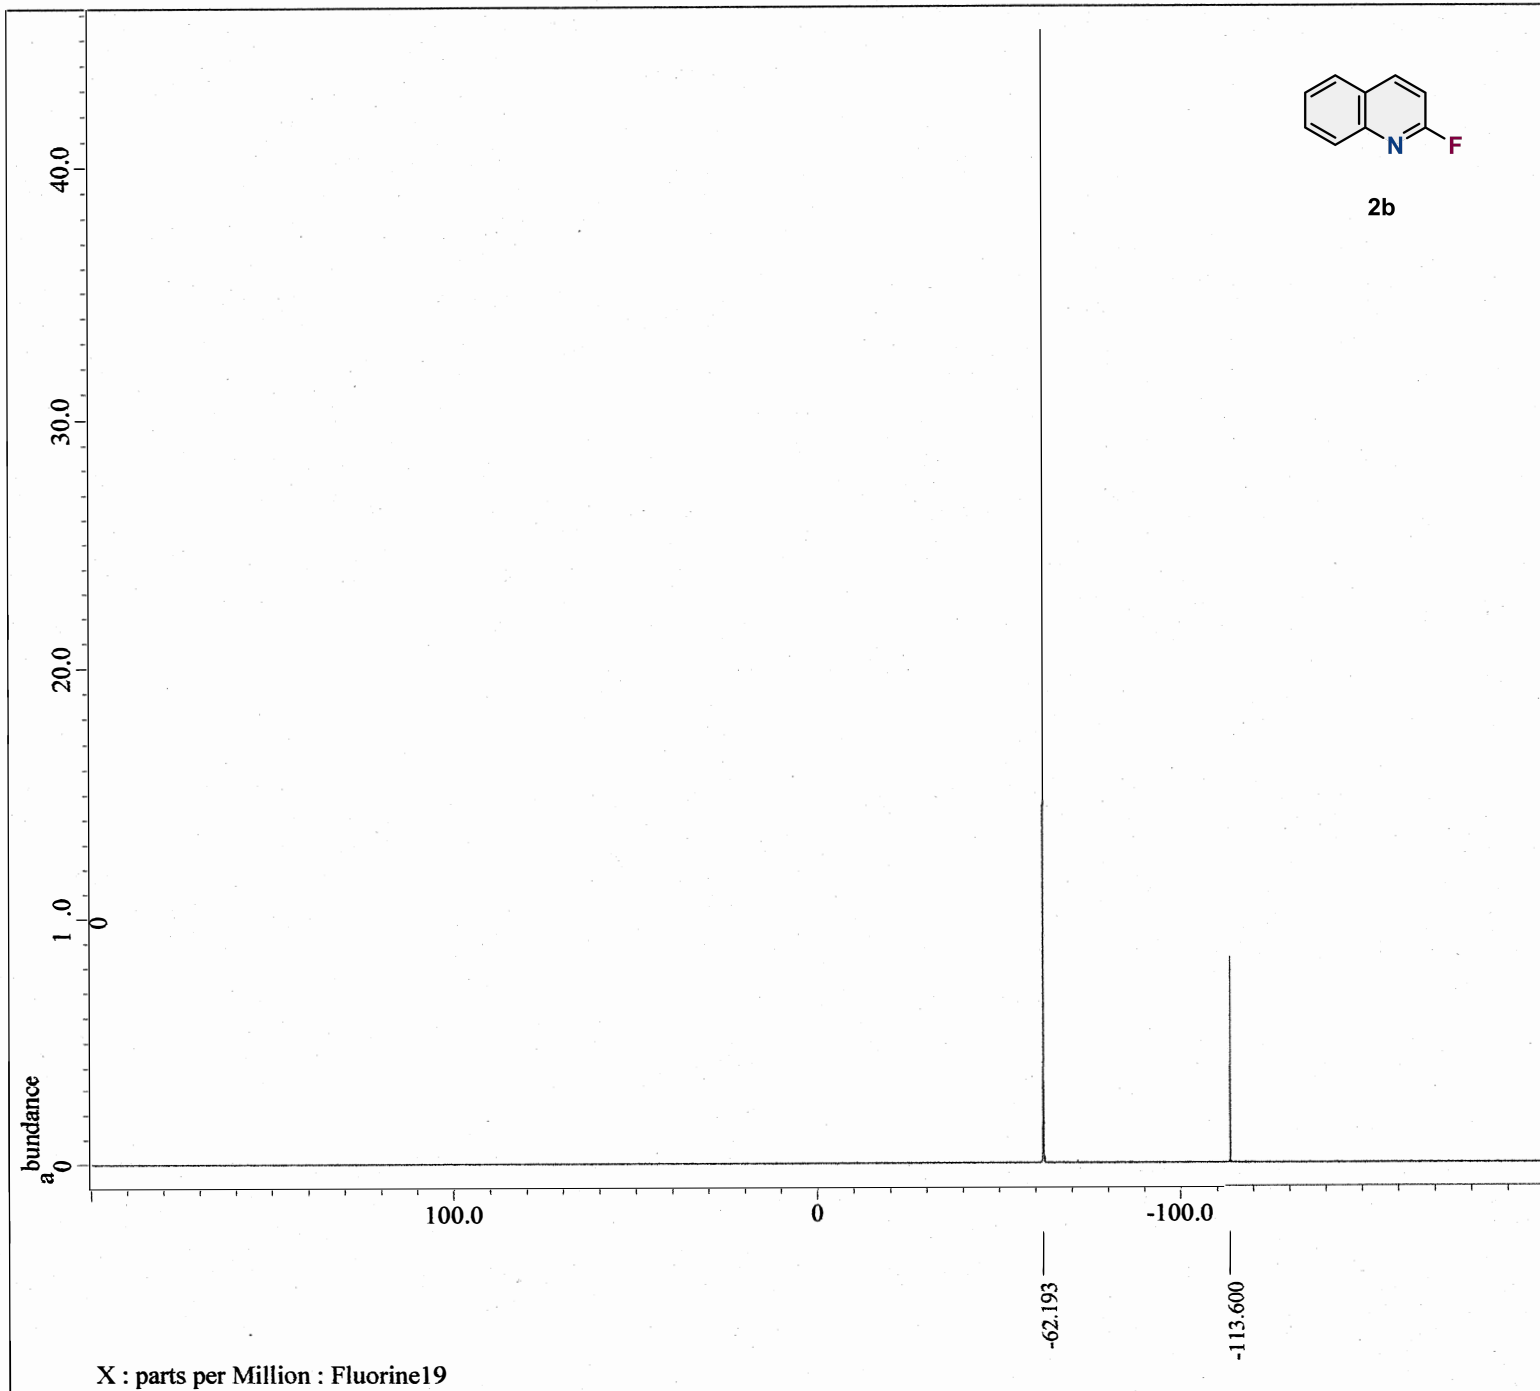

```

---- PROCESSING PARAMETERS ----
dc balance( 0, FALSE )
sexp( 0.2[Hz], 0.0[s] )
trap zoid( 0[%], 0[%], 80[%], 100[%] )
zer aEl( 1, TRUE )
blip( 16, 64, 30 )
fft( 1, TRUE, TRUE )
machinephase
ppm
phase( 6.31854, -50.40248, 78.10163[%] )

```

```

Filename      = MKN307-pure-int_single_pul
Author        = element
Experiment    = single_pulse.jxp
Sample Id     = MKN307-pure-int
Solvent       = CHLOROFORM-D
Actual Start Time = 27-FEB-2024 10:18:18
Revision Time  = 27-FEB-2024 10:58:38

```

```

Comment       = single pulse
Data Format    = 1D COMPLEX
Dim Size      = 13107
X Domain      = Fluorine19
Dim Title     = Fluorine19
Dim Units     = [ppm]
Dimensions    = X
Spectrometer  = DELTA2_NMR

```

```

Field Strength = 9.4073814[T] (400[MHz])
X Acq Duration = 86.50752[ms]
X Domain       = 19F
X Freq         = 376.87675879[MHz]
X Offset       = 0[ppm]
X Points       = 16384
X Prescans     = 1
X Resolution   = 11.55968868[Hz]
X Sweep       = 189.39393939[kHz]
X Sweep Clipped = 151.51515152[kHz]
Irr Domain     = Fluorine19
Irr Freq       = 376.87675879[MHz]
Irr Offset     = 5[ppm]
Tri Domain     = Fluorine19
Tri Freq       = 376.87675879[MHz]
Tri Offset     = 5[ppm]
Clipped        = F ASE
Scans          = 8
Total Scans    = 8

```

```

Relaxation Delay = 5[s]
Recvr Gain       = 46
Temp Get         = 19.3[dc]
X 90 Width      = 7.59[us]
X Acq Time       = 86.50752[ms]
X Angle         = 45[deg]
X Atn           = 3[dB]
X Pulse         = 3.795[us]
Irr Mode        = Off
Tri Mode        = Off
Date Presat     = FALSE
Initial Wait    = 1[s]
Repetition Time = 5.08650752[s]

```

X : parts per Million : Fluorine19

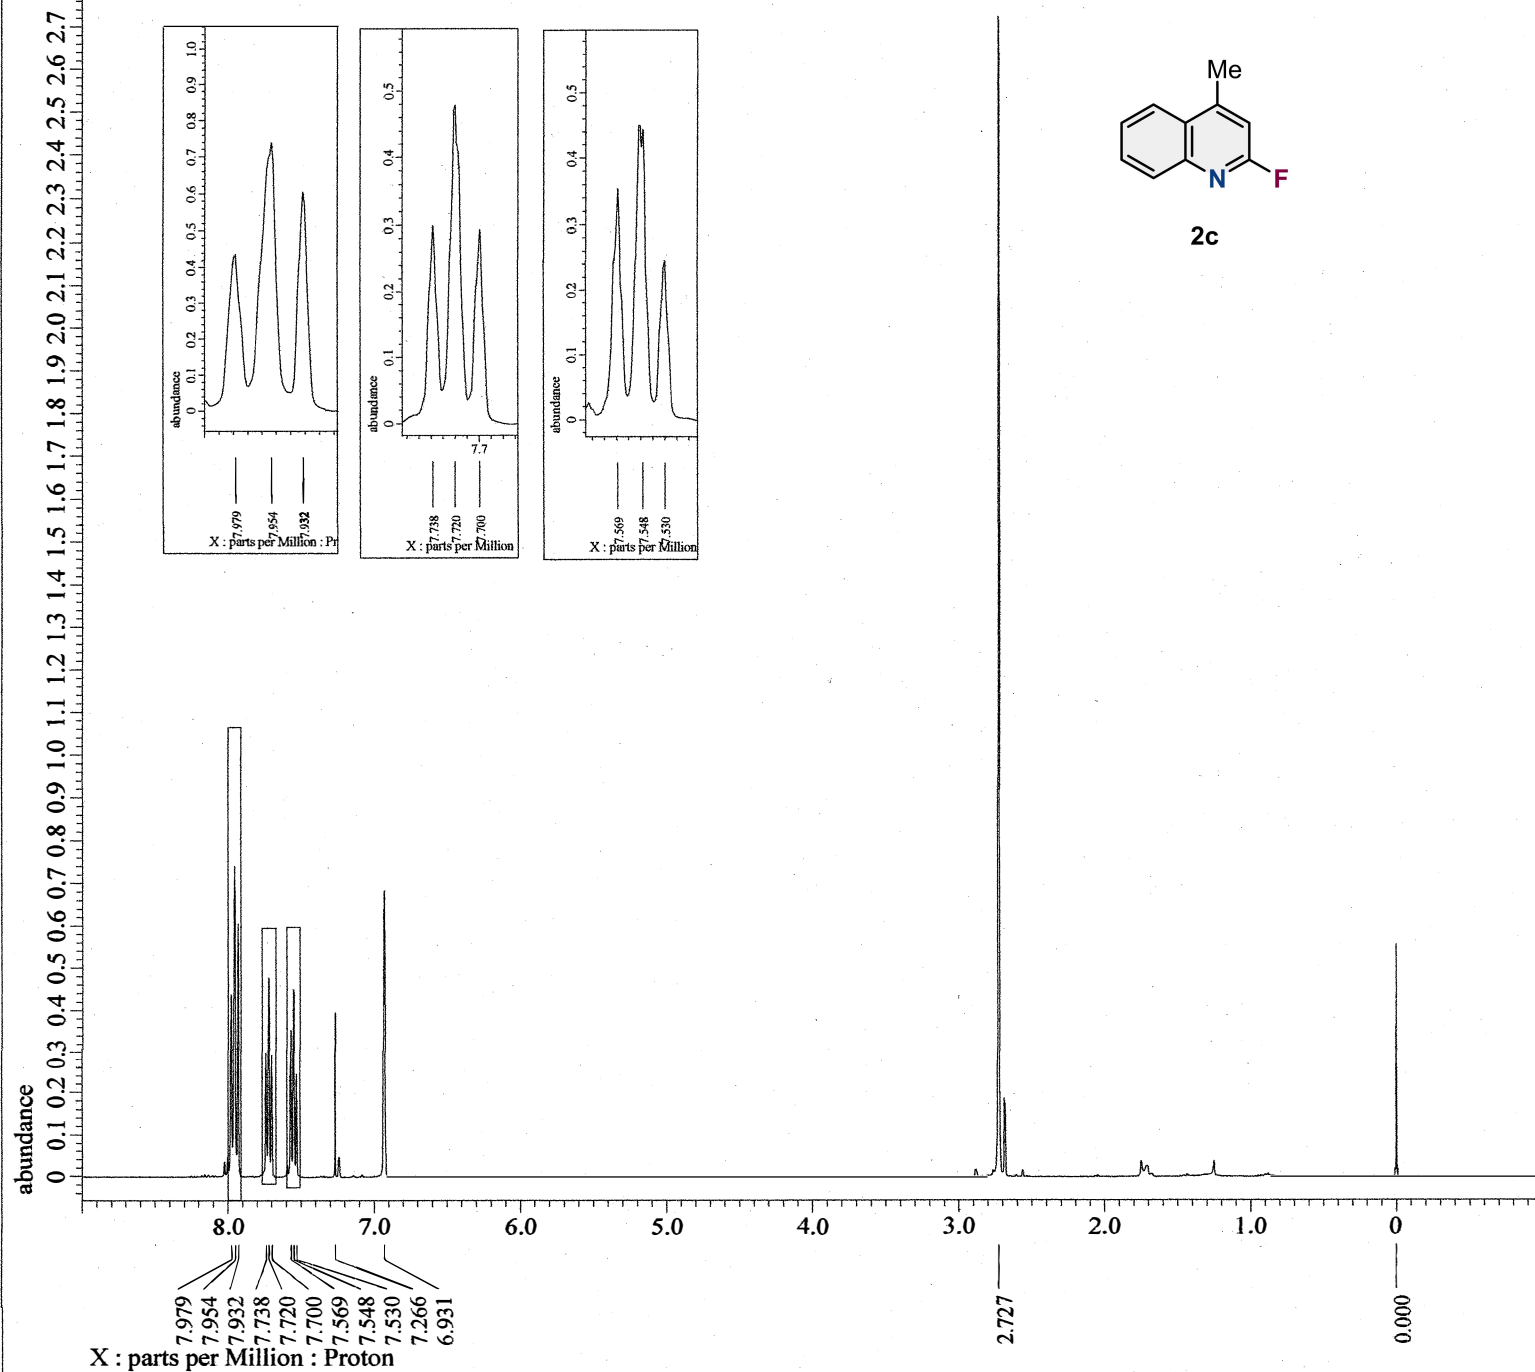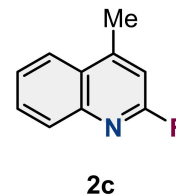

---- PROCESSING PARAMETERS ----  
 sexp( 0.2[Hz], 0.0[s] )  
 trapezoid( 0[%], 0[%], 80[%], 100[%] )  
 zerofill( 1, TRUE )  
 fft( 1, TRUE, TRUE )  
 machinephase  
 ppm  
 Derived from: MKN196-pure2 Proton-1-1.jdf

Filename = MKN196-pure2\_Proton-1-  
 Author = element  
 Experiment = proton\_auto.jxp  
 Sample Id = MKN196-pure2  
 Solvent = CHLOROFORM-D  
 Actual\_Start Time = 13-OCT-2023 14:56:10  
 Revision\_Time = 15-JUN-2024 17:34:36

Comment = single\_pulse  
 Data\_Format = 1D COMPLEX  
 Dim\_Size = 13107  
 X\_Domain = Proton  
 Dim\_Title = Proton  
 Dim\_Units = [ppm]  
 Dimensions = X  
 Spectrometer = DELTA2\_NMR

Field\_Strength = 9.2982153[T] (400[MHz])  
 X\_Acq\_Duration = 2.20725248[s]  
 X\_Domain = Proton  
 X\_Freq = 395.88430144[MHz]  
 X\_Offset = 5[ppm]  
 X\_Points = 16384  
 X\_Prescans = 1  
 X\_Resolution = 0.45305193[Hz]  
 X\_Sweep = 7.42280285[kHz]  
 X\_Sweep\_Clippped = 5.93824228[kHz]  
 Irr\_Domain = Proton  
 Irr\_Freq = 395.88430144[MHz]  
 Irr\_Offset = 5[ppm]  
 Tri\_Domain = Proton  
 Tri\_Freq = 395.88430144[MHz]  
 Tri\_Offset = 5[ppm]  
 Blanking = 2.0[us]  
 Clipped = FALSE  
 Scans = 8  
 Total\_Scans = 8

Relaxation\_Delay = 5[s]  
 Recvr\_Gain = 46  
 Temp\_Get = 17.5[dC]  
 X\_90\_Width = 6.34[us]  
 X\_Acq\_Time = 2.20725248[s]  
 X\_Angle = 45[deg]  
 X\_Atn = 5[dB]  
 X\_Pulse = 3.17[us]  
 Irr\_Mode = Off  
 Tri\_Mode = Off  
 Dante\_Loop = 500  
 Dante\_Presat = FALSE  
 Decimation\_Rate = 0  
 Initial\_wait = 1[s]  
 Phase = {0, 90, 270, 180, 180,

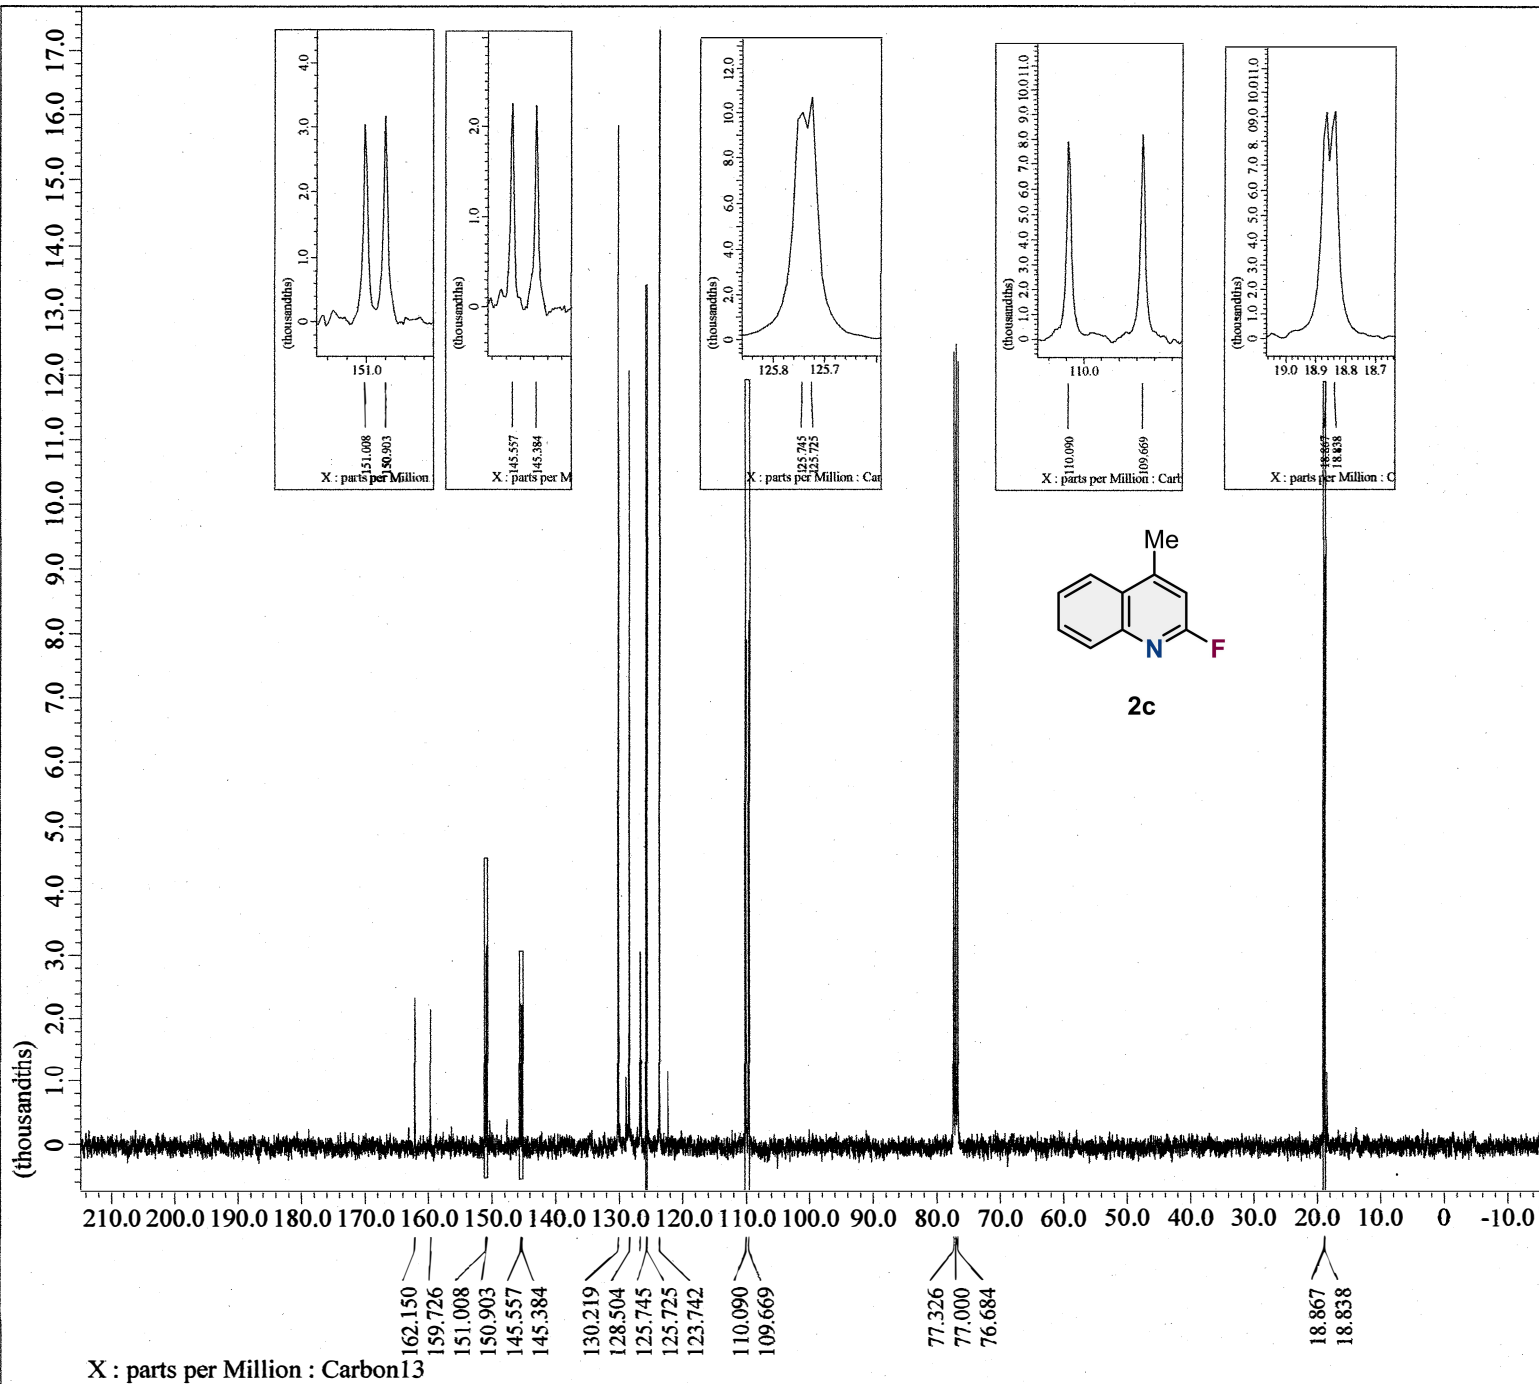

```

---- PROCESSING PARAMETERS ----
sexp( 2.0[Hz], 0.0[s] )
trapezoid( 0[%], 0[%], 80[%], 100[%] )
zerofill( 1, TRUE )
fft( 1, TRUE, TRUE )
machinephase
ppm

```

Derived from: MKN196-pure2 Carbon-1-1.jdf

```

Filename           = MKN196-pure2_Carbon
Author             = element
Experiment          = carbon_auto.jxp
Sample_Id          = MKN196-pure2
Solvent            = CHLOROFORM-D
Actual_Start_Time  = 13-OCT-2023 16:47:1
Revision_Time      = 15-JUN-2024 17:49:4

```

```

Comment           = single pulse decoupl
Data_Format       = 1D COMPLEX
Dim_Size          = 26214
X_Domain          = Carbon13
Dim_Title         = Carbon13
Dim_Units         = [ppm]
Dimensions        = X
Spectrometer      = DELTA2_NMR

```

```

Field_Strength    = 9.2982153[T] (400[M
X_Acq_Duration    = 1.048576[s]
X_Domain          = Carbon13
X_Freq            = 99.54517646[MHz]
X_Offset          = 100[ppm]
X_Points          = 32768
X_Prescans        = 4
X_Resolution      = 0.95367432[Hz]
X_Sweep           = 31.25[kHz]
X_Sweep_Clipped   = 25[kHz]
Irr_Domain        = Proton
Irr_Freq          = 395.88430144[MHz]
Irr_Offset        = 5[ppm]
Blanking          = 5.0[us]
Clipped           = FALSE
Scans             = 128
Total_Scans       = 128

```

```

Relaxation_Delay  = 2[s]
Recvr_Gain        = 50
Temp_Get          = 17.5[dC]
X_90_Width        = 11.5[us]
X_Acq_Time        = 1.048576[s]
X_Angle           = 30[deg]
X_Atn             = 9[dB]
X_Pulse           = 3.83333333[us]
Irr_Atn_Dec       = 30.172[dB]
Irr_Atn_Dec_Calc  = 30.172[dB]
Irr_Atn_Dec_Default_Calc = 30.172[dB]
Irr_Atn_Noise     = 30.172[dB]
Irr_Dec_Bandwidth_Hz = 4.7826087[kHz]
Irr_Dec_Bandwidth_Ppm = 12.08082432[ppm]
Irr_Dec_Freq      = 395.88430144[MHz]
Irr_Dec_Merit_Factor = 2.2
Irr_Decoupling    = TRUE
Irr_Noise         = TRUE

```

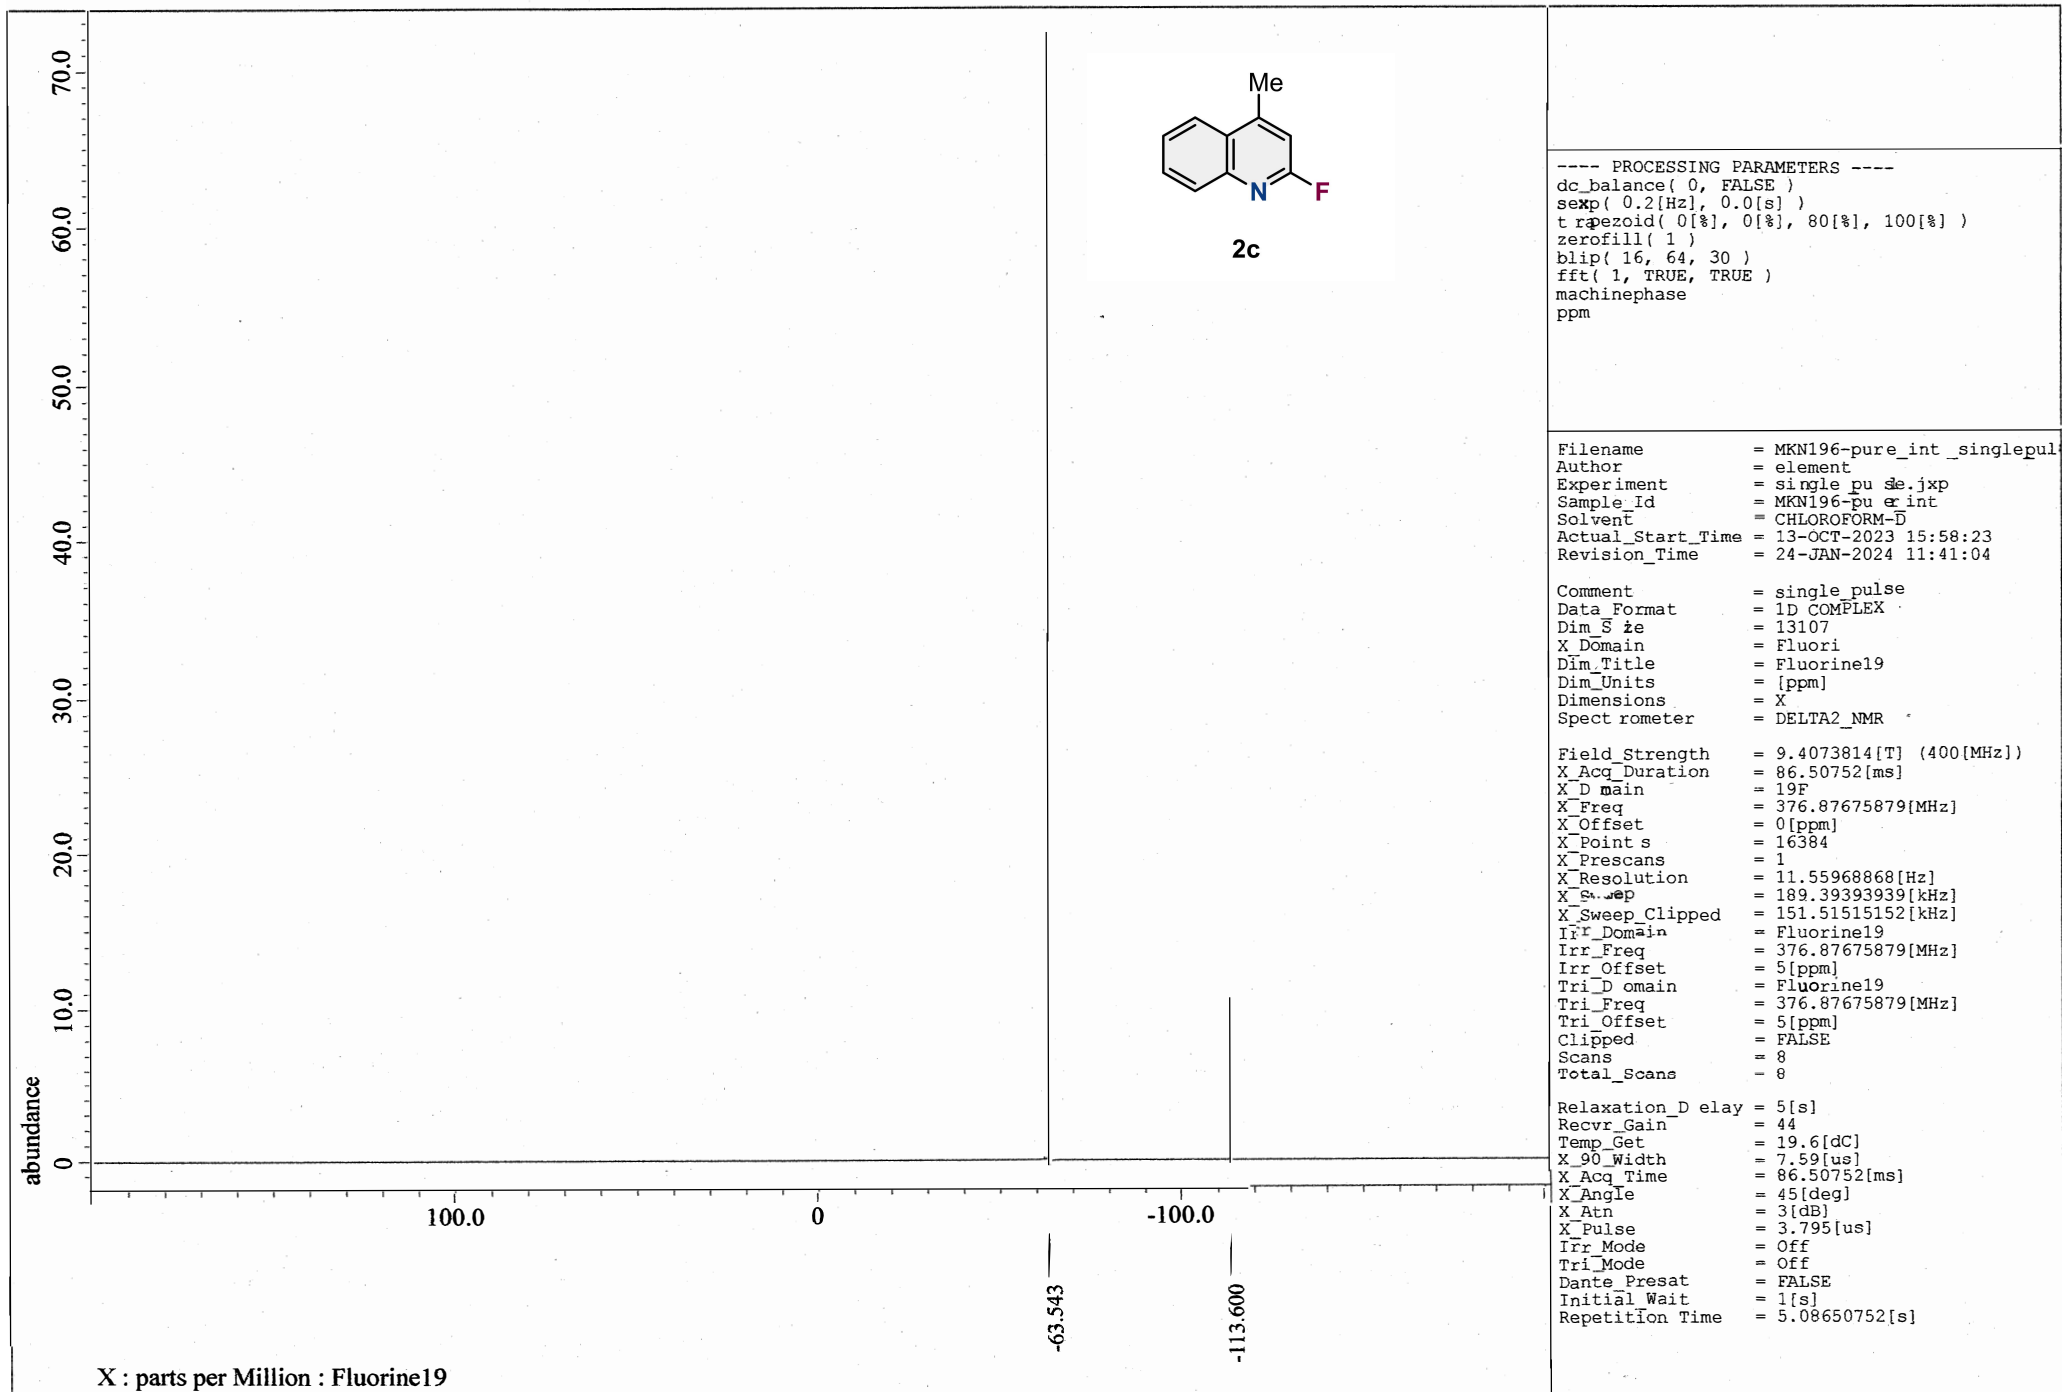

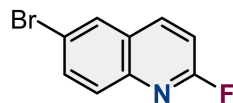

2d

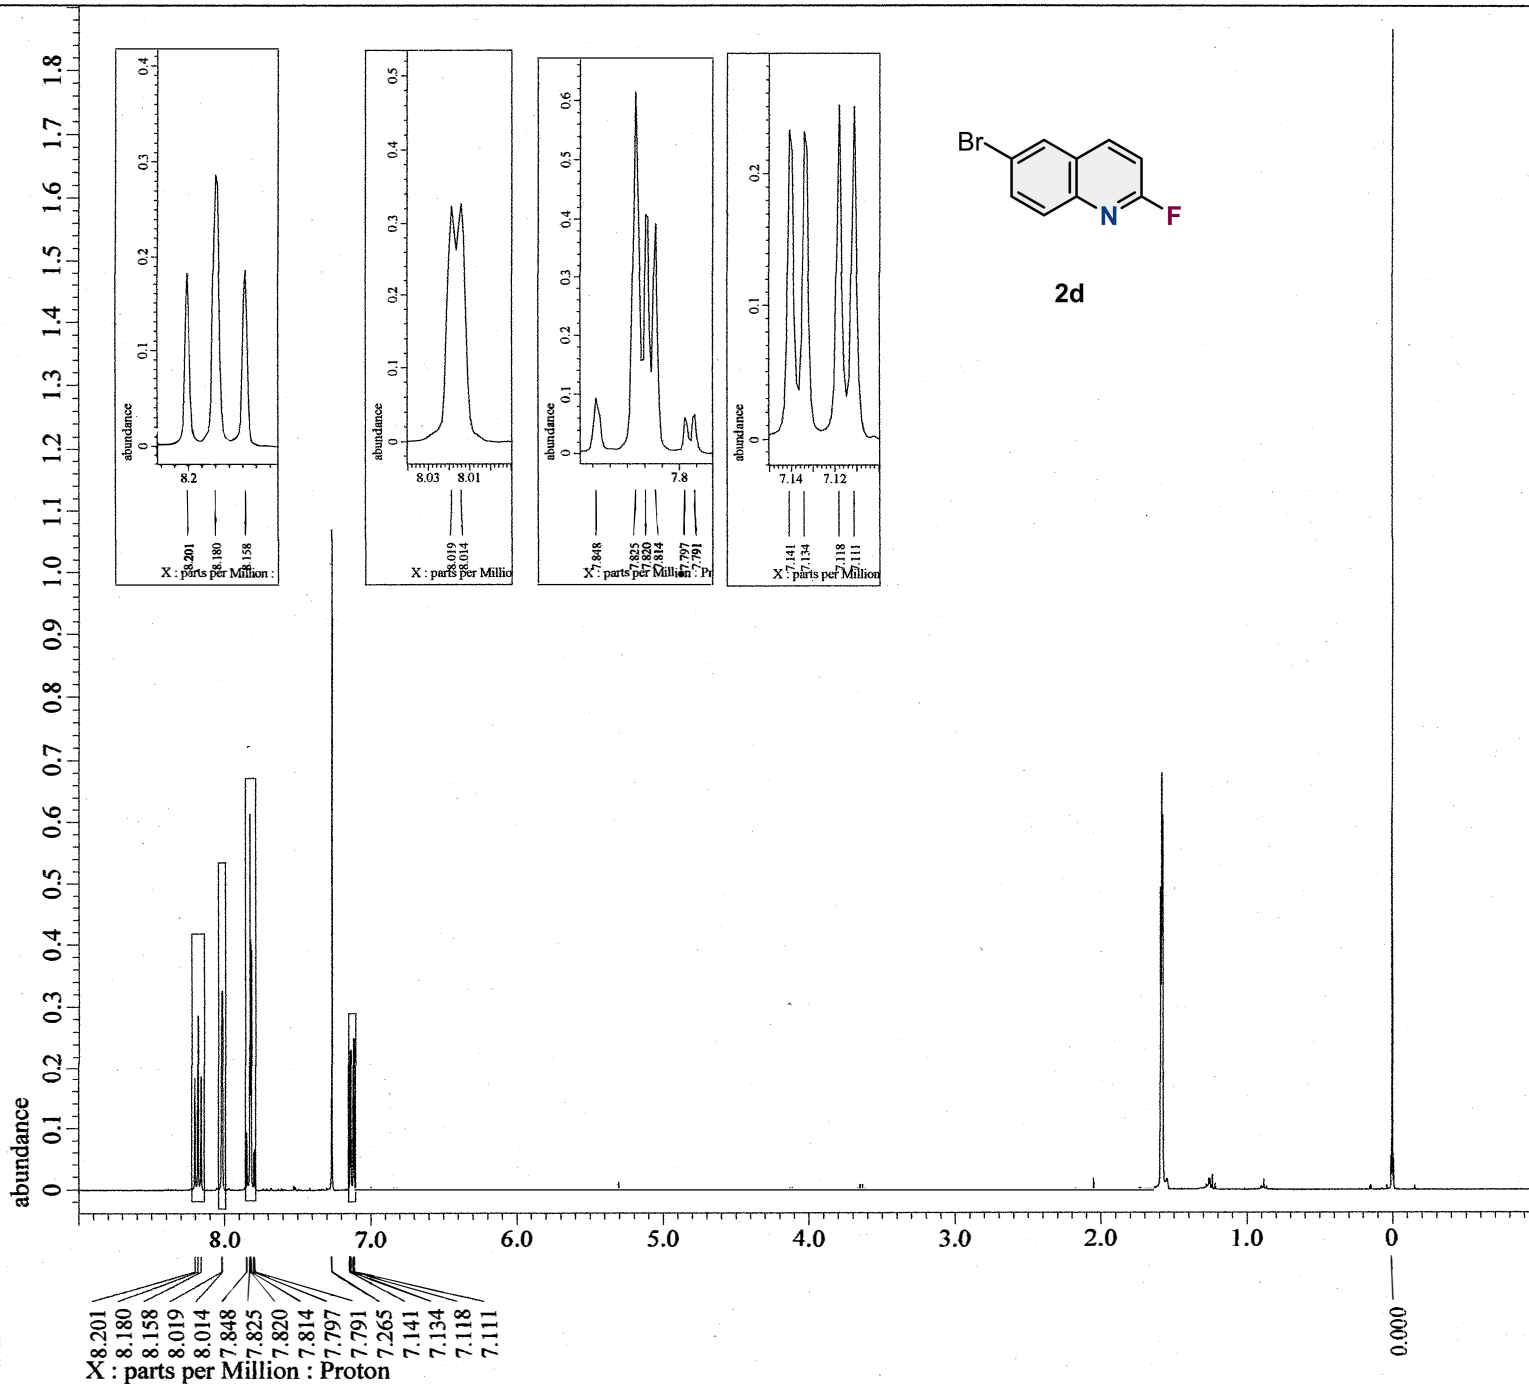

```

---- PROCESSING PARAMETERS ----
sepx( 0.2[Hz], 0.0[s] )
trapezoid( 0[%], 0[%], 80[%], 100[%] )
zerofill( 1, TRUE )
fft( 1, TRUE, TRUE )
machinephase
ppm

```

Derived from: MKN175-pure2 Proton-1-1.jdf

```

Filename           = MKN175-pure2_Proton-1-
Author             = element
Experiment          = proton_auto.jxp
Sample Id          = MKN175-pure2
Solvent            = CHLOROFORM-D
Actual_Start_Time  = 29-SEP-2023 13:08:04
Revision_Time      = 15-JUN-2024 16:06:04

```

```

Comment           = single_pulse
Data Format        = 1D COMPLEX
Dim Size          = 13107
X_Domain          = Proton
Dim Title         = Proton
Dim Units         = [ppm]
Dimensions        = X
Spectrometer      = DELTA2_NMR

```

```

Field_Strength    = 9.2982153[T] (400[MHz])
X_Acq_Duration    = 2.20725248[s]
X_Domain          = Proton
X_Freq            = 395.88430144[MHz]
X_Offset          = 5[ppm]
X_Points          = 16384
X_Prescans        = 1
X_Resolution      = 0.45305193[Hz]
X_Sweep           = 7.42280285[kHz]
X_Sweep_Clippped = 5.93824228[kHz]
Irr_Domain        = Proton
Irr_Freq          = 395.88430144[MHz]
Irr_Offset        = 5[ppm]
Tri_Domain        = Proton
Tri_Freq          = 395.88430144[MHz]
Tri_Offset        = 5[ppm]
Blanking          = 2.0[us]
Clipped           = FALSE
Scans             = 8
Total_Scans       = 8

```

```

Relaxation_Delay  = 5[s]
Recvr_Gain        = 56
Temp_Get          = 19[dc]
X_90_Width        = 6.34[us]
X_Acq_Time        = 2.20725248[s]
X_Angle           = 45[deg]
X_Atn             = 5[dB]
X_Pulse           = 3.17[us]
Irr_Mode          = Off
Tri_Mode          = Off
Dante_Loop        = 500
Dante_Presat      = FALSE
Decimation_Rate   = 0
Initial_Wait      = 1[s]
Phase             = {0, 90, 270, 180, 180,

```



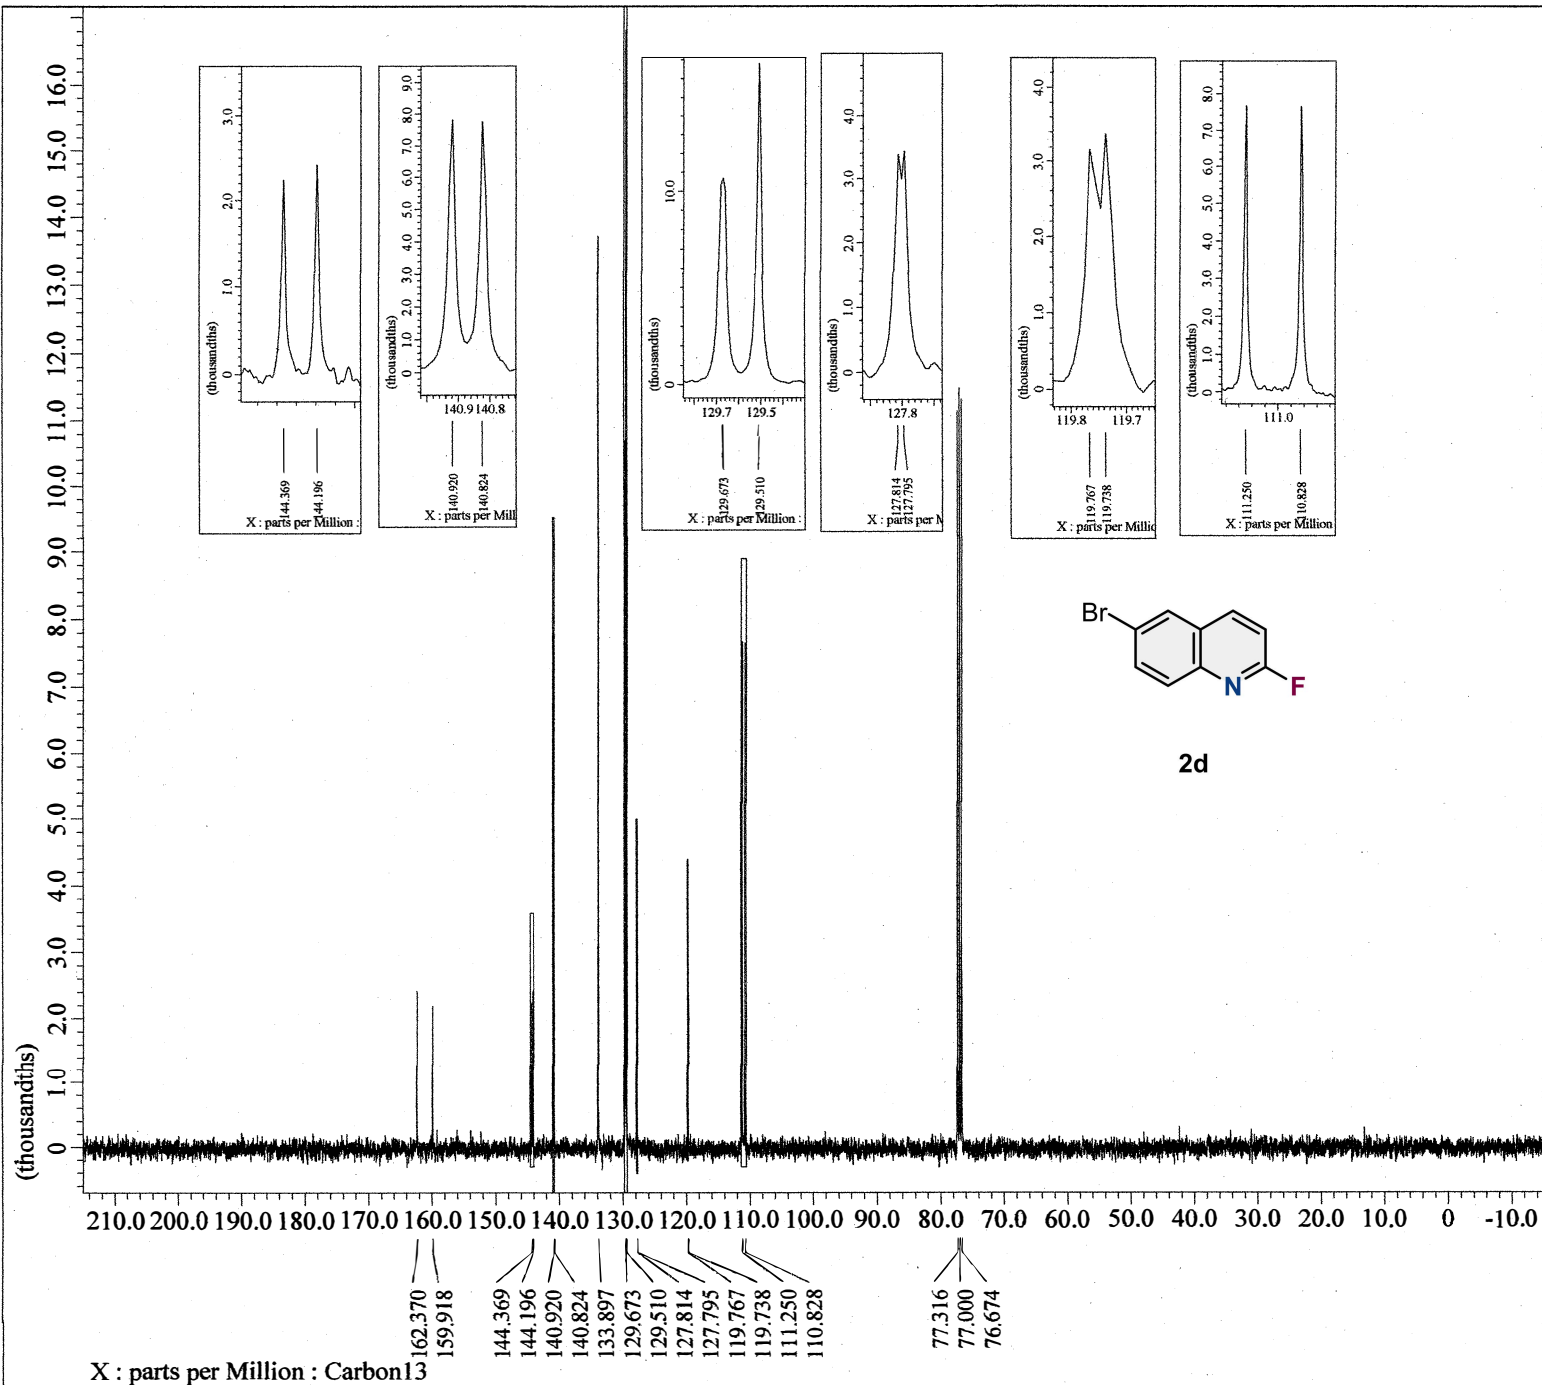

```

---- PROCESSING PARAMETERS ----
sexp( 2.0[Hz], 0.0[s] )
trapezoid( 0[%], 0[%], 80[%], 100[%] )
zerofill( 1, TRUE )
fft( 1, TRUE, TRUE )
machinephase
ppm

```

Derived from: MKN175-pure2 Carbon-1-1.jdf

```

Filename           = MKN175-pure2_Carbon
Author             = element
Experiment         = carbon_auto.jxp
Sample_Id         = MKN175-pure2
Solvent           = CHLOROFORM-D
Actual_Start_Time = 14-OCT-2023 11:17:5
Revision_Time     = 15-JUN-2024 16:19:3

```

```

Comment           = single pulse decoupl
Data_Format       = 1D COMPLEX
Dim_Size          = 26214
X_Domain          = Carbon13
Dim_Title         = Carbon13
Dim_Units         = [ppm]
Dimensions        = X
Spectrometer      = DELTA2_NMR

```

```

Field_Strength    = 9.2982153[T] (400[M
X_Acq_Duration    = 1.048576[s]
X_Domain          = Carbon13
X_Freq            = 99.54517646[MHz]
X_Offset          = 100[ppm]
X_Points          = 32768
X_Prescans        = 4
X_Resolution      = 0.95367432[Hz]
X_Sweep           = 31.25[kHz]
X_Sweep_Clippped = 25[kHz]
Irr_Domain        = Proton
Irr_Freq          = 395.88430144[MHz]
Irr_Offset        = 5[ppm]
Blanking          = 5.0[us]
Clipped           = FALSE
Scans             = 128
Total_Scans       = 128

```

```

Relaxation_Delay  = 2[s]
Recvr_Gain        = 50
Temp_Get          = 19.5[dC]
X_90_Width        = 11.5[us]
X_Acq_Time        = 1.048576[s]
X_Angle           = 30[deg]
X_Atn             = 9[dB]
X_Pulse           = 3.83333333[us]
Irr_Atn_Dec       = 30.172[dB]
Irr_Atn_Dec_Calc = 30.172[dB]
Irr_Atn_Dec_Default_Calc = 30.172[dB]
Irr_Atn_Noise    = 30.172[dB]
Irr_Dec_Bandwidth_Hz = 4.7826087[kHz]
Irr_Dec_Bandwidth_Ppm = 12.08082432[ppm]
Irr_Dec_Freq     = 395.88430144[MHz]
Irr_Dec_Merit_Factor = 2.2
Irr_Decoupling   = TRUE
Irr_Noise        = TRUE

```

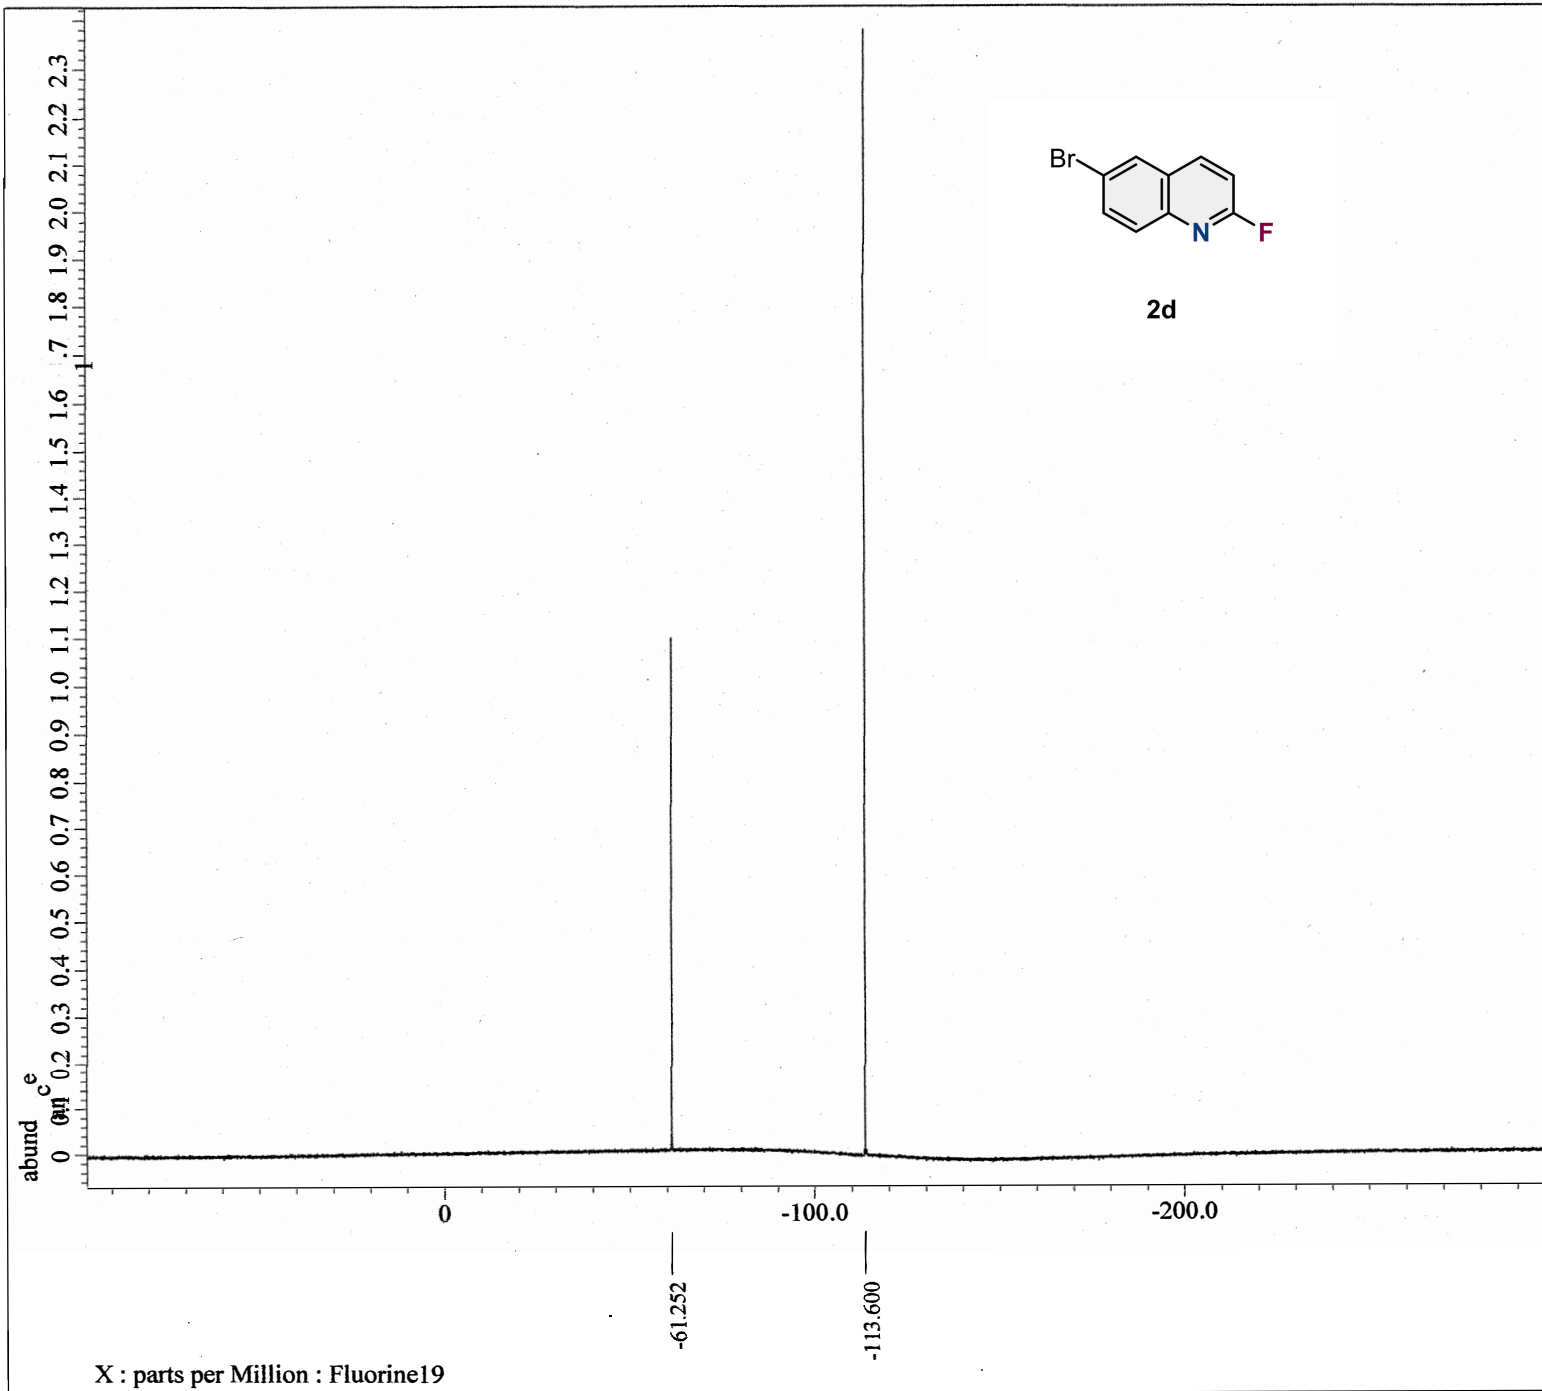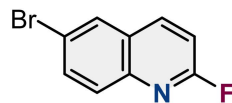

2d

```

---- PROCESSING PARAMETERS ----
sexp( 0.2[Hz], 0.0[s] )
trapezoid( 0[%], 0[%], 80[%], 100[%] )
zerofill( 1 )
fft( 1, TRUE, TRUE )
machinephase
ppm
phase( 83.95055, 0, 50[%] )

```

```

Filename           = MKN175-pure2_int_singl
Author             = element
Experiment          = single_pulse.jxp
Sample_Id          = MKN175-pure2_int
Solvent            = CHLOROFORM-D
Actual_Start_Time  = 14-OCT-2023 11:13:30
Revision_Time      = 24-JAN-2024 11:35:11

Comment           = single_pulse
Data_Format       = 1D_COMP_EX
Dim_Size          = 13107
X_Domain          = Fluorine19
Dim Title         = Fluorine19
Dim Units         = [ppm]
Dimensions        = X
Spectrometer      = DELTA2_NMR

Field_Strength    = 9.2982153[T] (400[MHz])
X_Acq_Duration    = 89.12896[ms]
X_Domain          = Fluorine19
X_Freq            = 372.50336686[MHz]
X_Offset          = -100[ppm]
X_Points          = 16384
X_Prescans        = 1
X_Resolution      = 11.21969784[Hz]
X_Sweep           = 183.82352941[kHz]
X_Sweep_Clippped = 147.05882353[kHz]
Irr_Domain        = Fluorine19
Irr_Freq         = 372.50336686[MHz]
Irr_Offset        = 5[ppm]
Tri_Domain        = Fluorine19
Tri_Freq         = 372.50336686[MHz]
Tri_Offset        = 5[ppm]
Blanking          = 2.0[us]
Clipped           = FALSE
Scans             = 8
Total_Scans       = 8

Relaxation_Delay  = 5[s]
Recvr_Gain        = 56
Temp_Get          = 19.1[dC]
X_90_Width        = 8.03[us]
X_Acq_Time        = 89.12896[ms]
X_Angle           = 45[deg]
X_Atn             = 5[dB]
X_Pulse           = 4.015[us]
Irr_Mode          = Off
Tri_Mode          = Off
Dante_Loop        = 500
Dante_Presat      = FALSE
Decimation_Rate   = 0
Initial_Wait      = 1[s]
Phase             = {0, 90, 270, 180, 180,

```

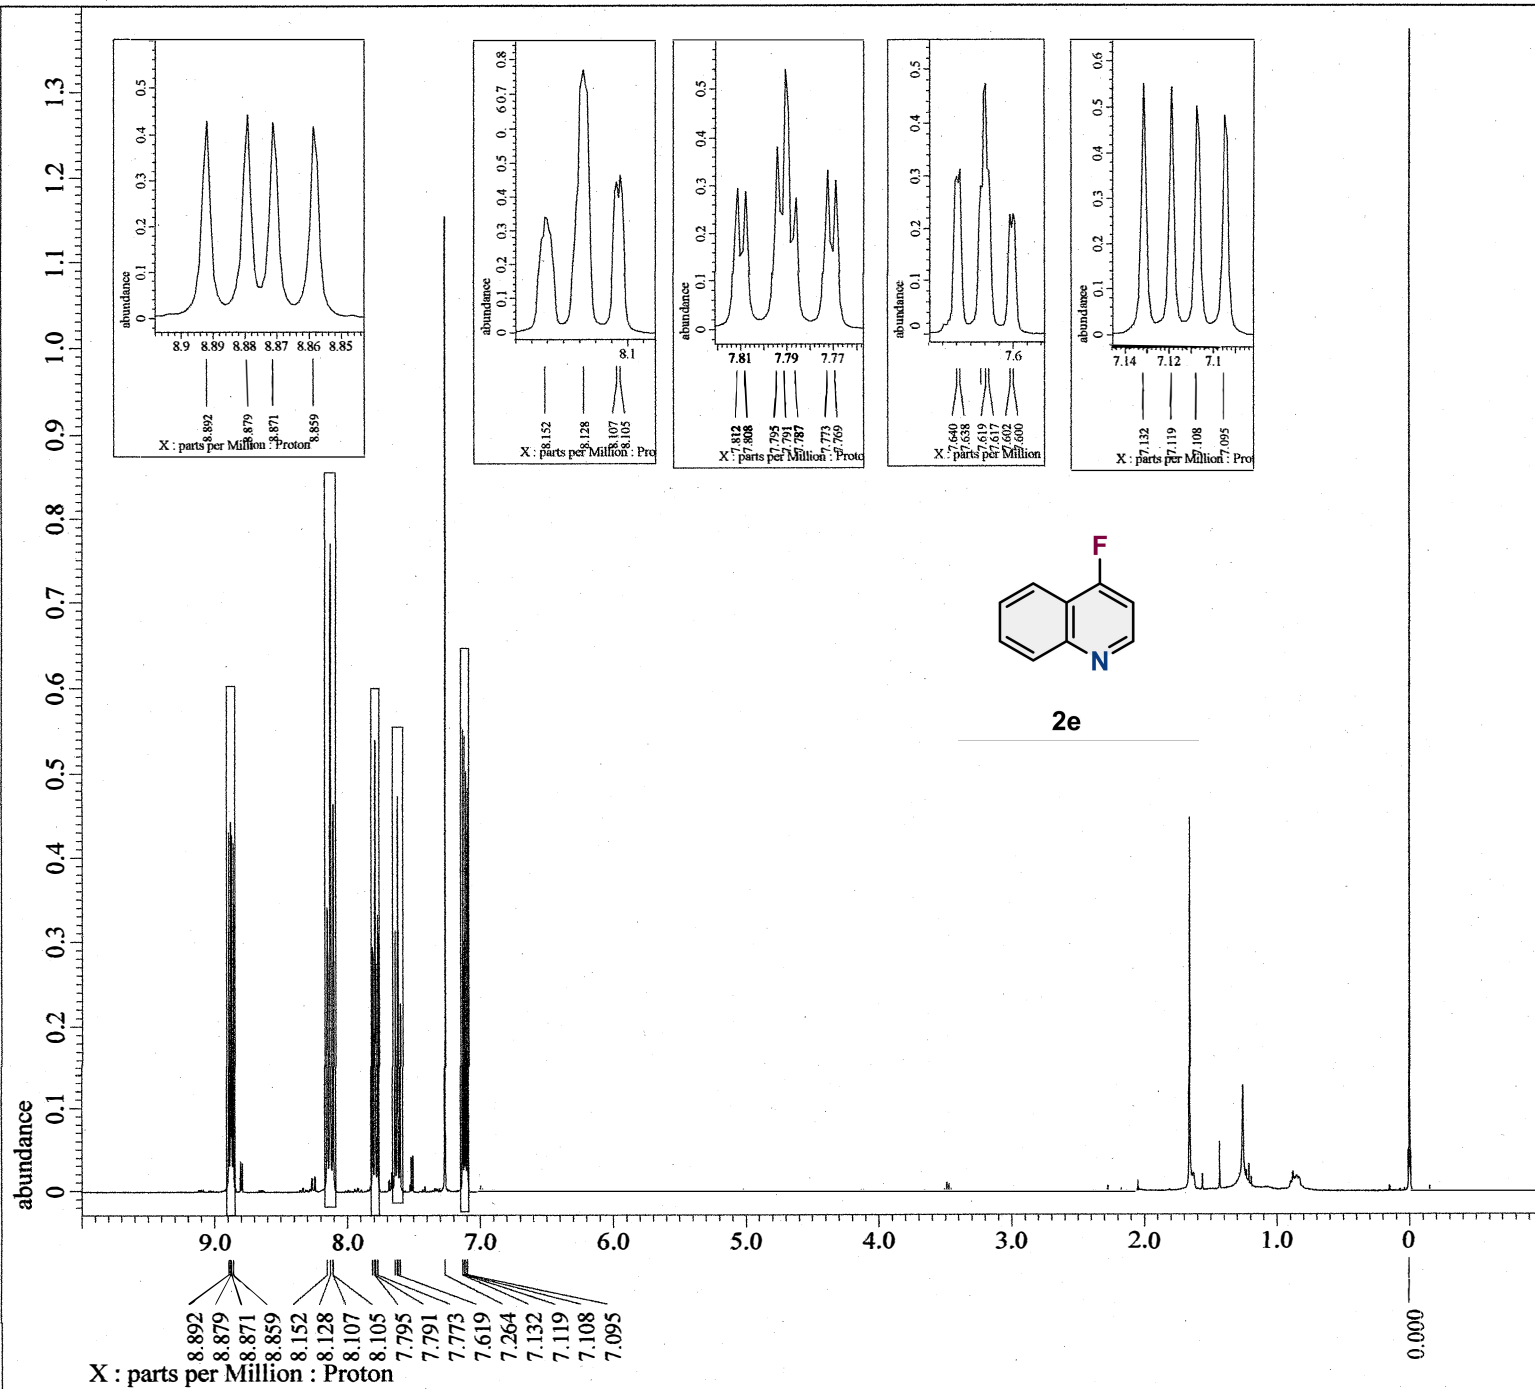

```

---- PROCESSING PARAMETERS ----
sexp( 0.2[Hz], 0.0[s] )
trapezoid( 0[%], 0[%], 80[%], 100[%] )
zerofill( 1, TRUE )
fft( 1, TRUE, TRUE )
machinephase
ppm

Derived from: MKN281-pure Proton-1-1.jdf

Filename           = MKN281-pure_Proton-1-2
Author             = element
Experiment         = proton_auto.jxp
Sample Id         = MKN281-column
Solvent           = CHLOROFORM-D
Actual Start Time = 25-JAN-2024 20:22:45
Revision_Time     = 15-JUN-2024 16:42:20

Comment           = single pulse
Data Format       = 1D COMPLEX
Dim_Size        = 13107
X_Domain        = Proton
Dim Title       = Proton
Dim Units       = [ppm]
Dimensions      = X
Spectrometer    = DELTA2_NMR

Field Strength   = 9.2982153[T] (400[MHz])
X_Acq_Duration  = 2.20725248[s]
X_Domain        = Proton
X_Freq          = 395.88430144[MHz]
X_Offset        = 5[ppm]
X_Points        = 16384
X_Prescans      = 1
X_Resolution    = 0.45305193[Hz]
X_Sweep         = 7.42280285[kHz]
X_Sweep_Clipped = 5.93824228[kHz]
Irr_Domain      = Proton
Irr_Freq        = 395.88430144[MHz]
Irr_Offset      = 5[ppm]
Tri_Domain      = Proton
Tri_Freq        = 395.88430144[MHz]
Tri_Offset      = 5[ppm]
Blanking        = 2.0[us]
Clipped         = FALSE
Scans           = 8
Total_Scans     = 8

Relaxation_Delay = 5[s]
Recvr Gain       = 56
Temp Get         = 19.6[dC]
X_90_Width      = 6.34[us]
X_Acq Time      = 2.20725248[s]
X_Angle         = 45[deg]
X_Atn           = 5[dB]
X_Pulse         = 3.17[us]
Irr Mode        = Off
Tri Mode        = Off
Dante Loop      = 500
Dante_Presat   = FALSE
Decimation Rate = 0
Initial_Wait    = 1[s]
Phase           = {0, 90, 270, 180, 180,

```

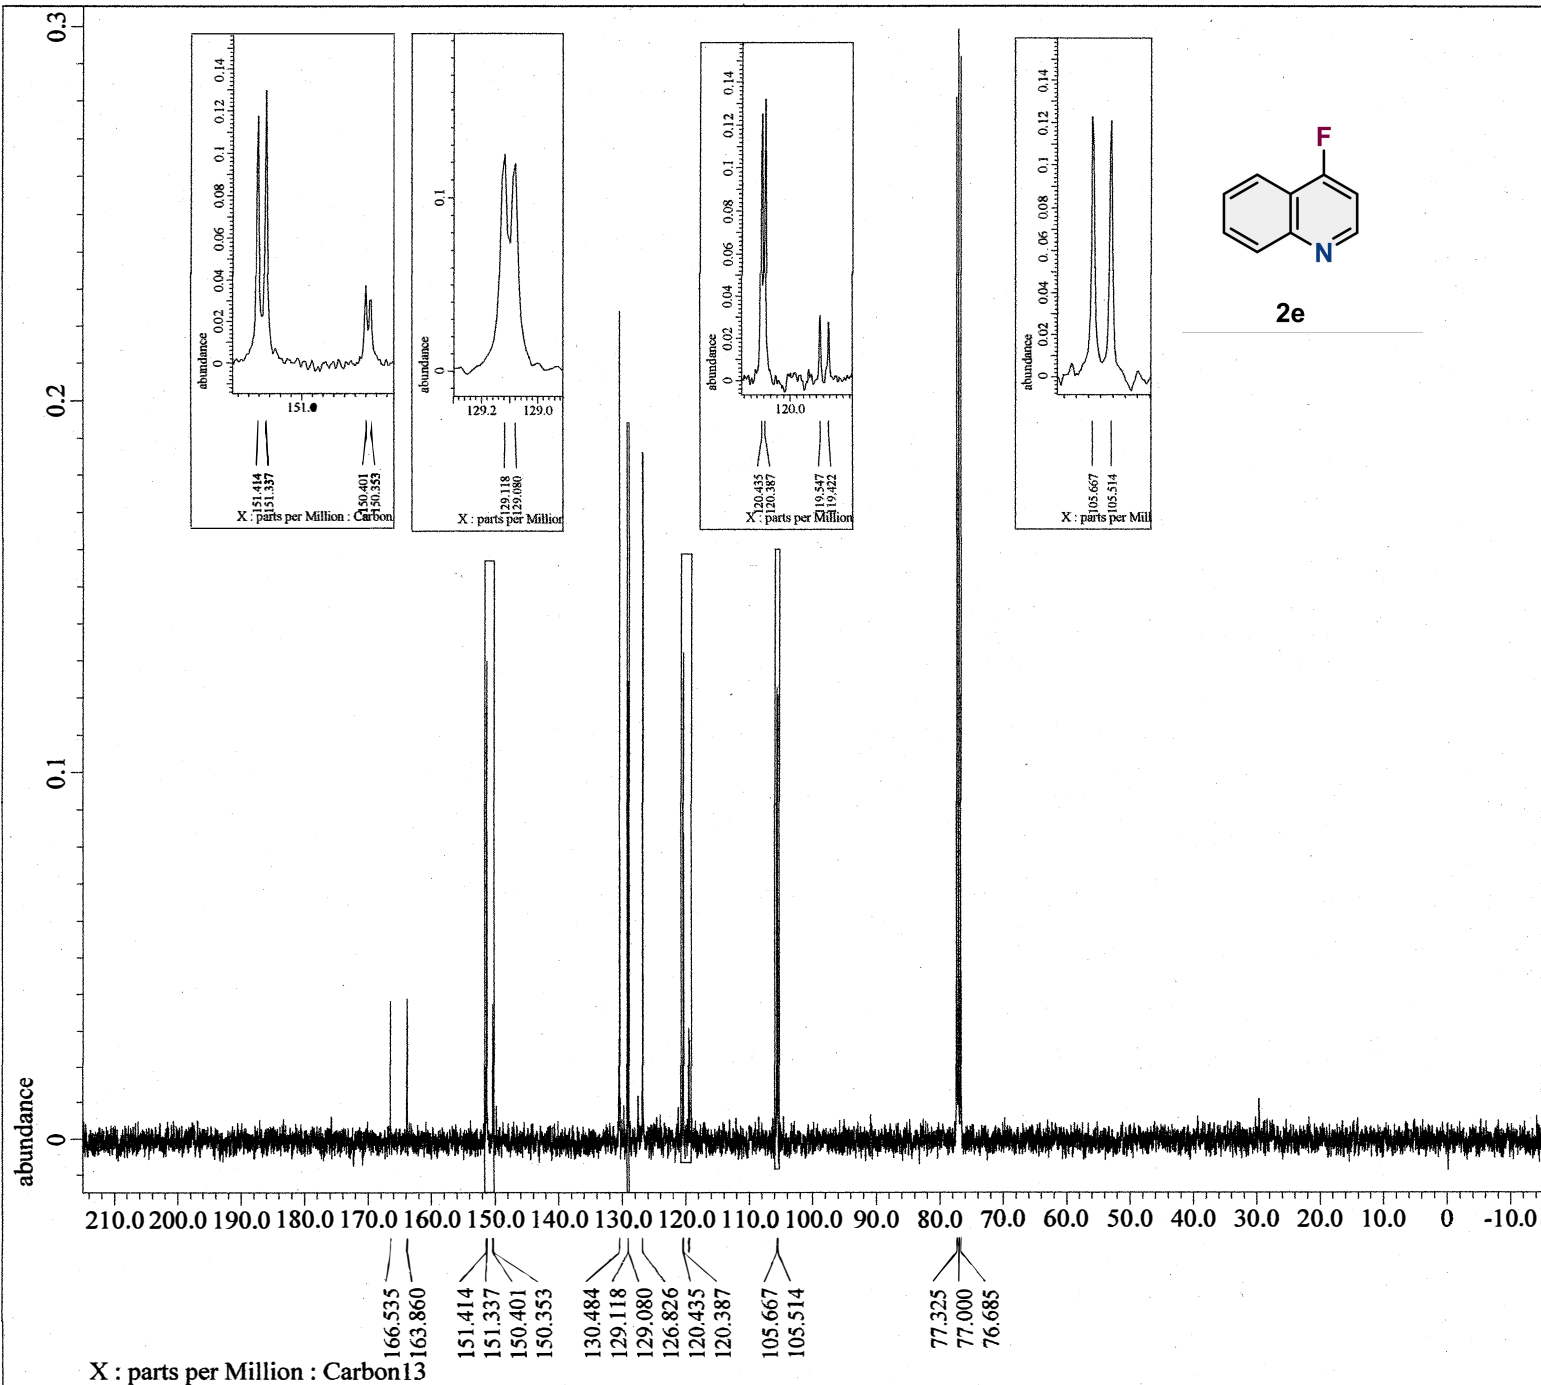

---- PROCESSING PARAMETERS ----  
 dc balance( 0, FALSE )  
 seXP( 2.0[Hz], 0.0[s] )  
 trapezoid( 0[%], 0[%], 80[%], 100[%] )  
 zerofill( 1, TRUE )  
 fft( 1, TRUE, TRUE )  
 machinephase  
 ppm

Derived from: MKN281-pure Carbon-1-1.jdf

Filename = MKN281-pure\_Carbon-1-3.jdf  
 Author = element  
 Experiment = carbon.jxp  
 Sample Id = MKN281-pure  
 Solvent = CHLOROFORM-D  
 Actual\_Start Time = 3-FEB-2024 12:56:29  
 Revision\_Time = 15-JUN-2024 17:12:39

Comment = single pulse decoupled gat  
 Data\_Format = 1D COMPLEX  
 Dim\_Size = 26214  
 X\_Domain = Carbon  
 Dim\_Title = Carbon13  
 Dim\_Units = [ppm]  
 Dimensions = X  
 Site = JNM-ECS400  
 Spectrometer = DELTA2\_NMR

Field\_Strength = 9.37221[T] (400[MHz])  
 X\_Acq\_Duration = 1.04333312[s]  
 X\_Domain = 13C  
 X\_Freq = 100.33735165[MHz]  
 X\_Offset = 100.0[ppm]  
 X\_Points = 32768  
 X\_Prescans = 4  
 X\_Resolution = 0.95846665[Hz]  
 X\_Sweep = 31.40703518[kHz]  
 X\_Sweep\_Clippped = 25.12562814[kHz]  
 Irr\_Domain = Proton  
 Irr\_Freq = 399.03472754[MHz]  
 Irr\_Offset = 5.0[ppm]  
 Clipped = FALSE  
 Scans = 128  
 Total\_Scans = 128

Relaxation\_Delay = 2[s]  
 Recvr Gain = 50  
 Temp\_Get = 19.1[dC]  
 X\_90\_Width = 10.9[us]  
 X\_Acq\_Time = 1.04333312[s]  
 X\_Angle = 30[deg]  
 X\_Atn = 5.4[dB]  
 X\_Pulse = 3.63333333[us]  
 Irr\_Atn\_Dec = 25.823[dB]  
 Irr\_Atn\_NoE = 25.823[dB]  
 Irr\_Noise = WALTZ  
 Irr\_Pwidth = 0.115[ms]  
 Decoupling = TRUE  
 Initial\_Wait = 1[s]  
 Noe = TRUE  
 Noe\_Time = 2[s]  
 Repetition Time = 3.04333312[s]

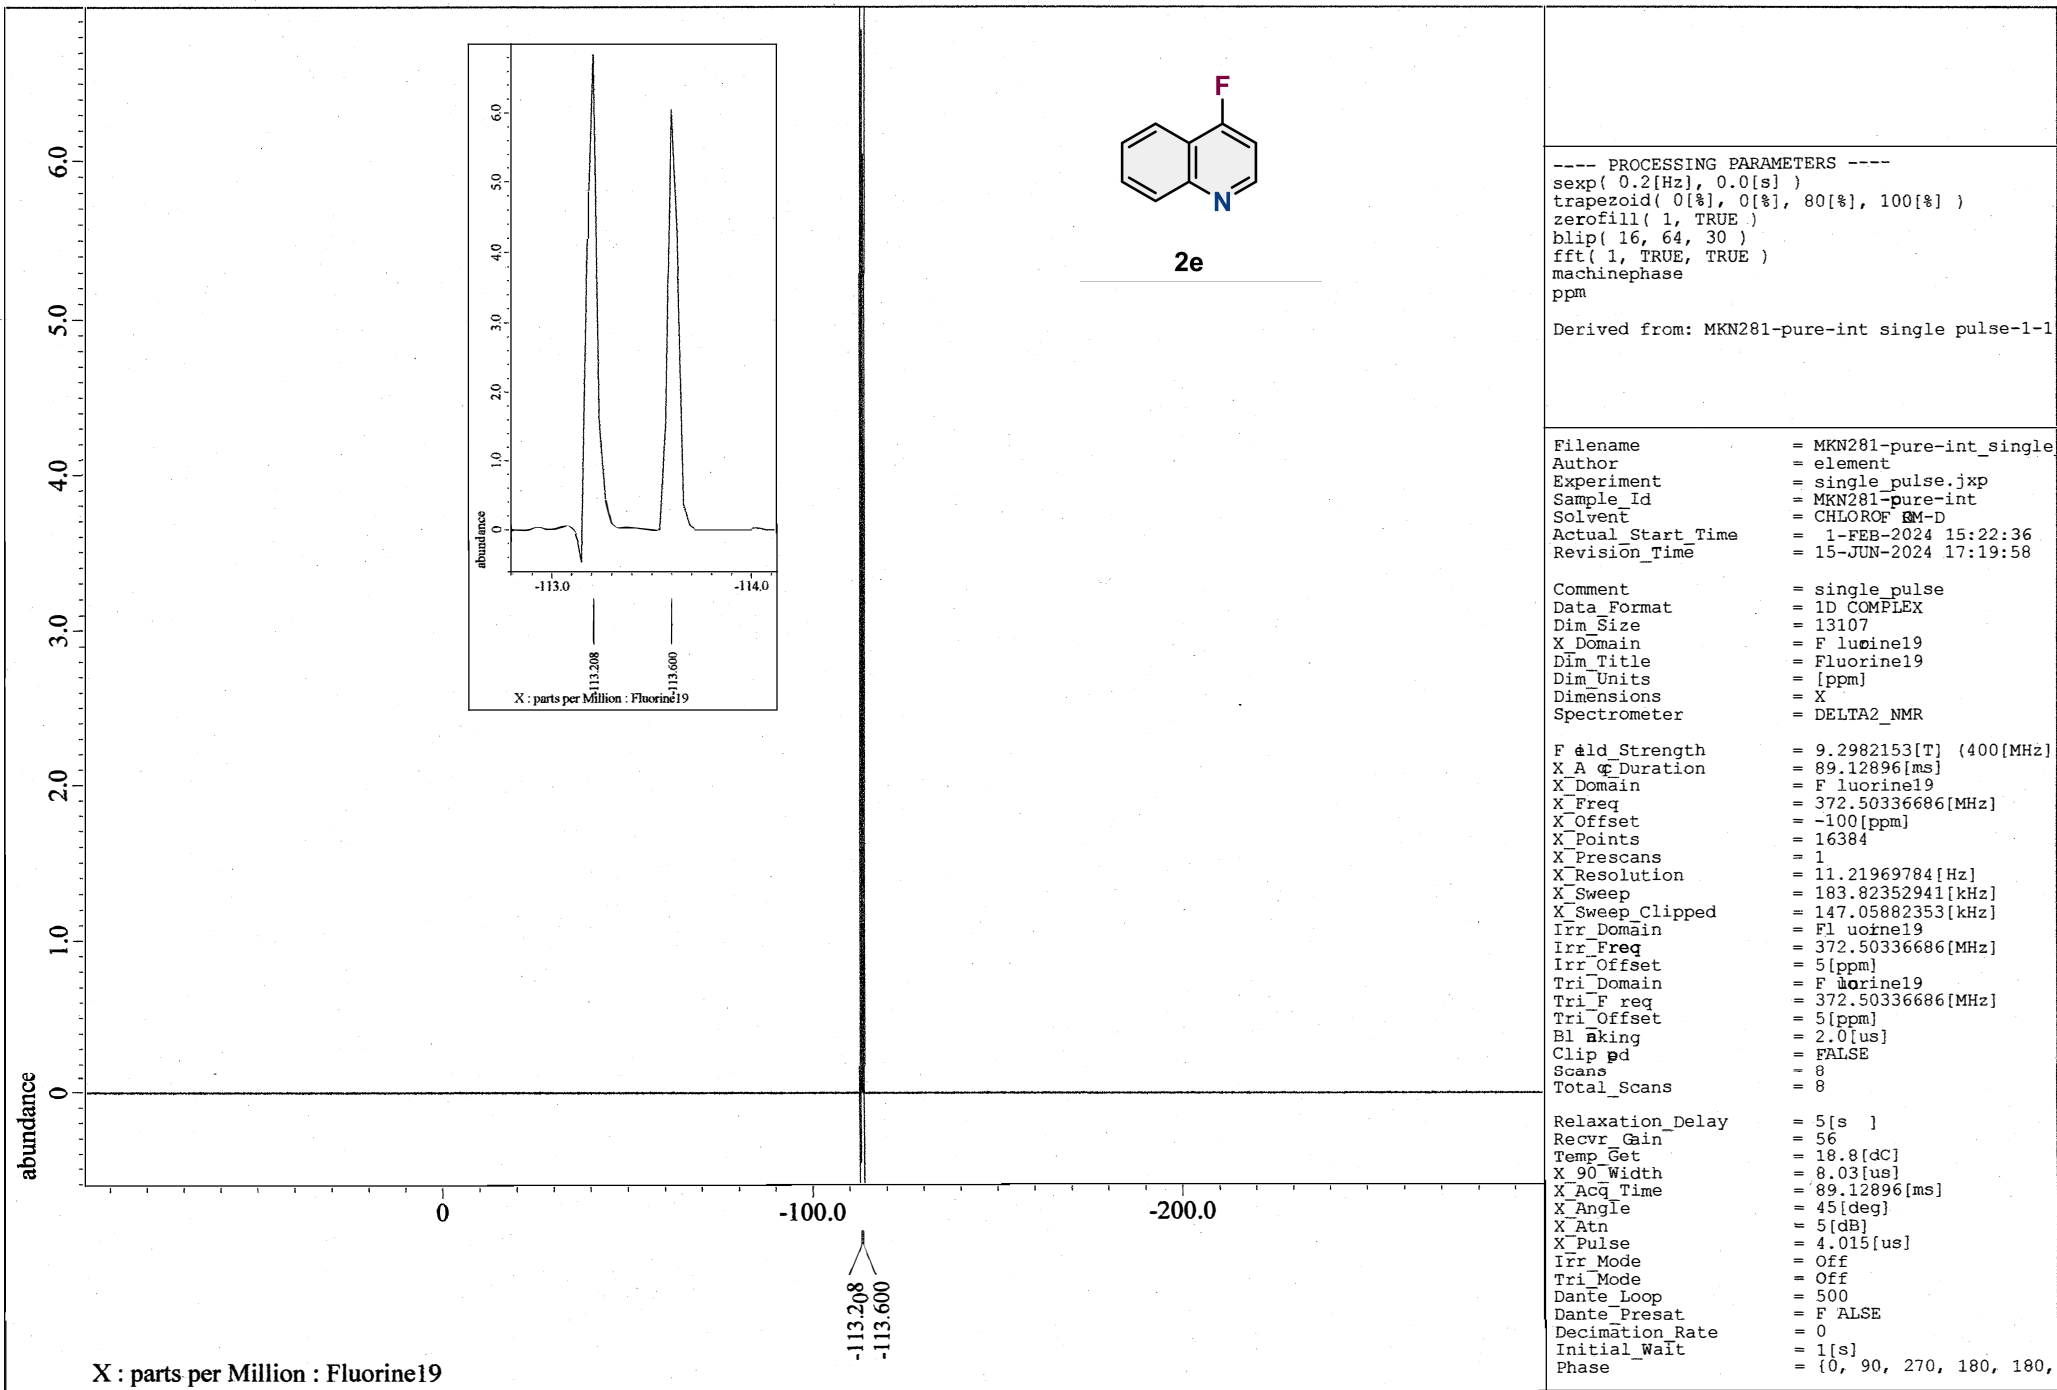

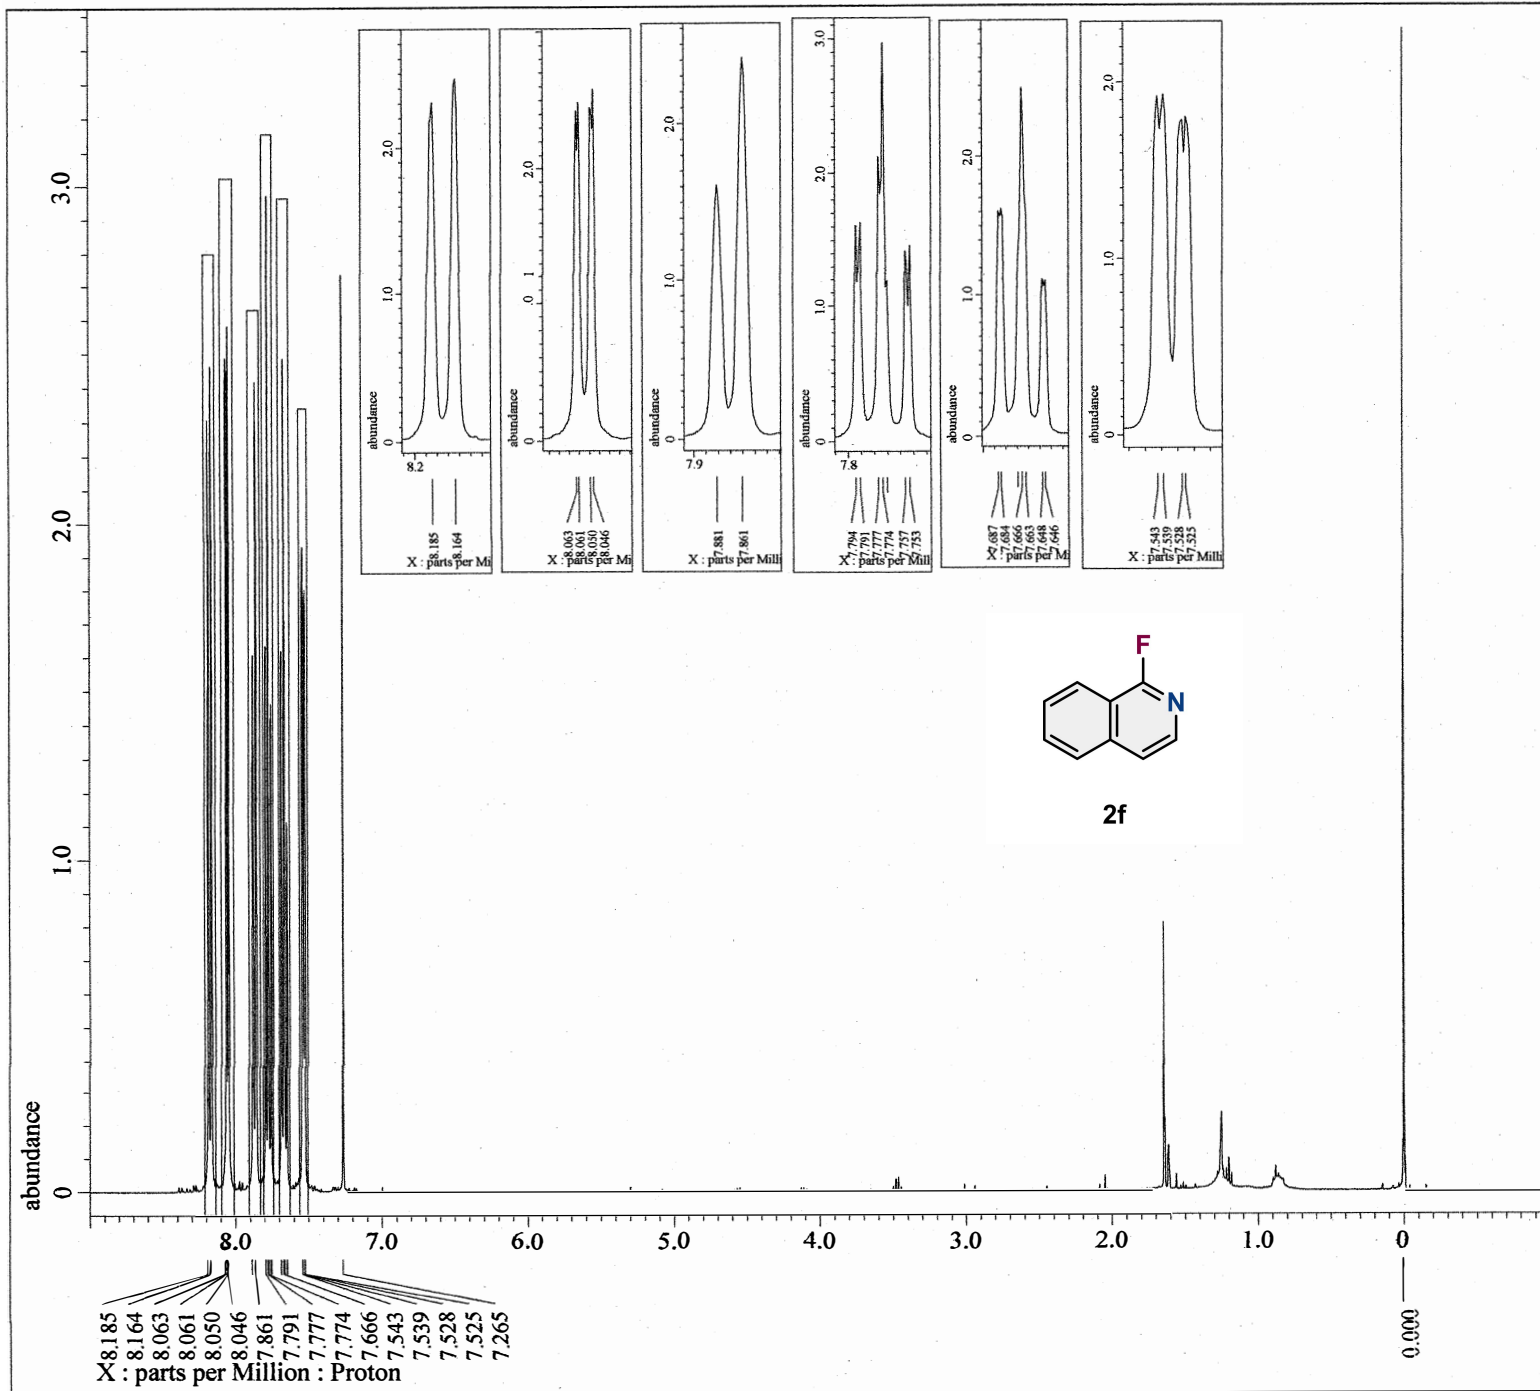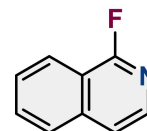

2f

```

---- PROCESSING PARAMETERS ----
dc balance( 0, FALSE )
sexp( 0.2[Hz], 0.0[s] )
trapezoid( 0[%], 0[%], 80[%], 100[%] )
zerofill( 1, TRUE )
fft( 1, TRUE, TRUE )
machinephase
ppm

```

Derived from: MKN306 pure Proton-1-1.jdf

```

Filename      = MKN306_pure_Proton-1-3.jdf
Author       = element
Experiment   = proton.jxp
Sample Id    = MKN306.column
Solvent      = CHLOROFORM-D
Actual Start Time = 22-FEB-2024 19:59:20
Revision Time = 17-JUN-2024 12:12:47

```

```

Comment      = single pulse
Data Format   = 1D COMPLEX
Dim_Size     = 13107
X_Domain     = Proton
Dim_Title    = Proton
Dim_Units    = [ppm]
Dimensions   = X
Site         = JNM-ECS400
Spectrometer = DELTA2_NMR

```

```

Field Strength = 9.37221[T] (400[MHz])
X_Acq_Duration = 2.1889024[s]
X_Domain       = 1H
X_Freq         = 399.03472754[MHz]
X_Offset       = 5.0[ppm]
X_Points       = 16384
X_Prescans     = 1
X_Resolution   = 0.45684997[Hz]
X_Sweep        = 7.48502994[kHz]
X_Sweep_Clippped = 5.98802395[kHz]
Irr_Domain     = Proton
Irr_Freq       = 399.03472754[MHz]
Irr_Offset     = 5.0[ppm]
Tri_Domain     = Proton
Tri_Freq       = 399.03472754[MHz]
Tri_Offset     = 5.0[ppm]
Clipped        = FALSE
Scans          = 8
Total_Scans    = 8

```

```

Relaxation_Delay = 5[s]
Recvr_Gain       = 40
Temp_Get         = 18.2[dC]
X_90_Width       = 6.6[us]
X_Acq_Time       = 2.1889024[s]
X_Angle          = 45[deg]
X_Atn           = 1[dB]
X_Pulse         = 3.3[us]
Irr_Mode         = Off
Tri_Mode        = Off
Dante_Presat    = FALSE
Initial_Wait     = 1[s]
Repetition Time = 7.1889024[s]

```

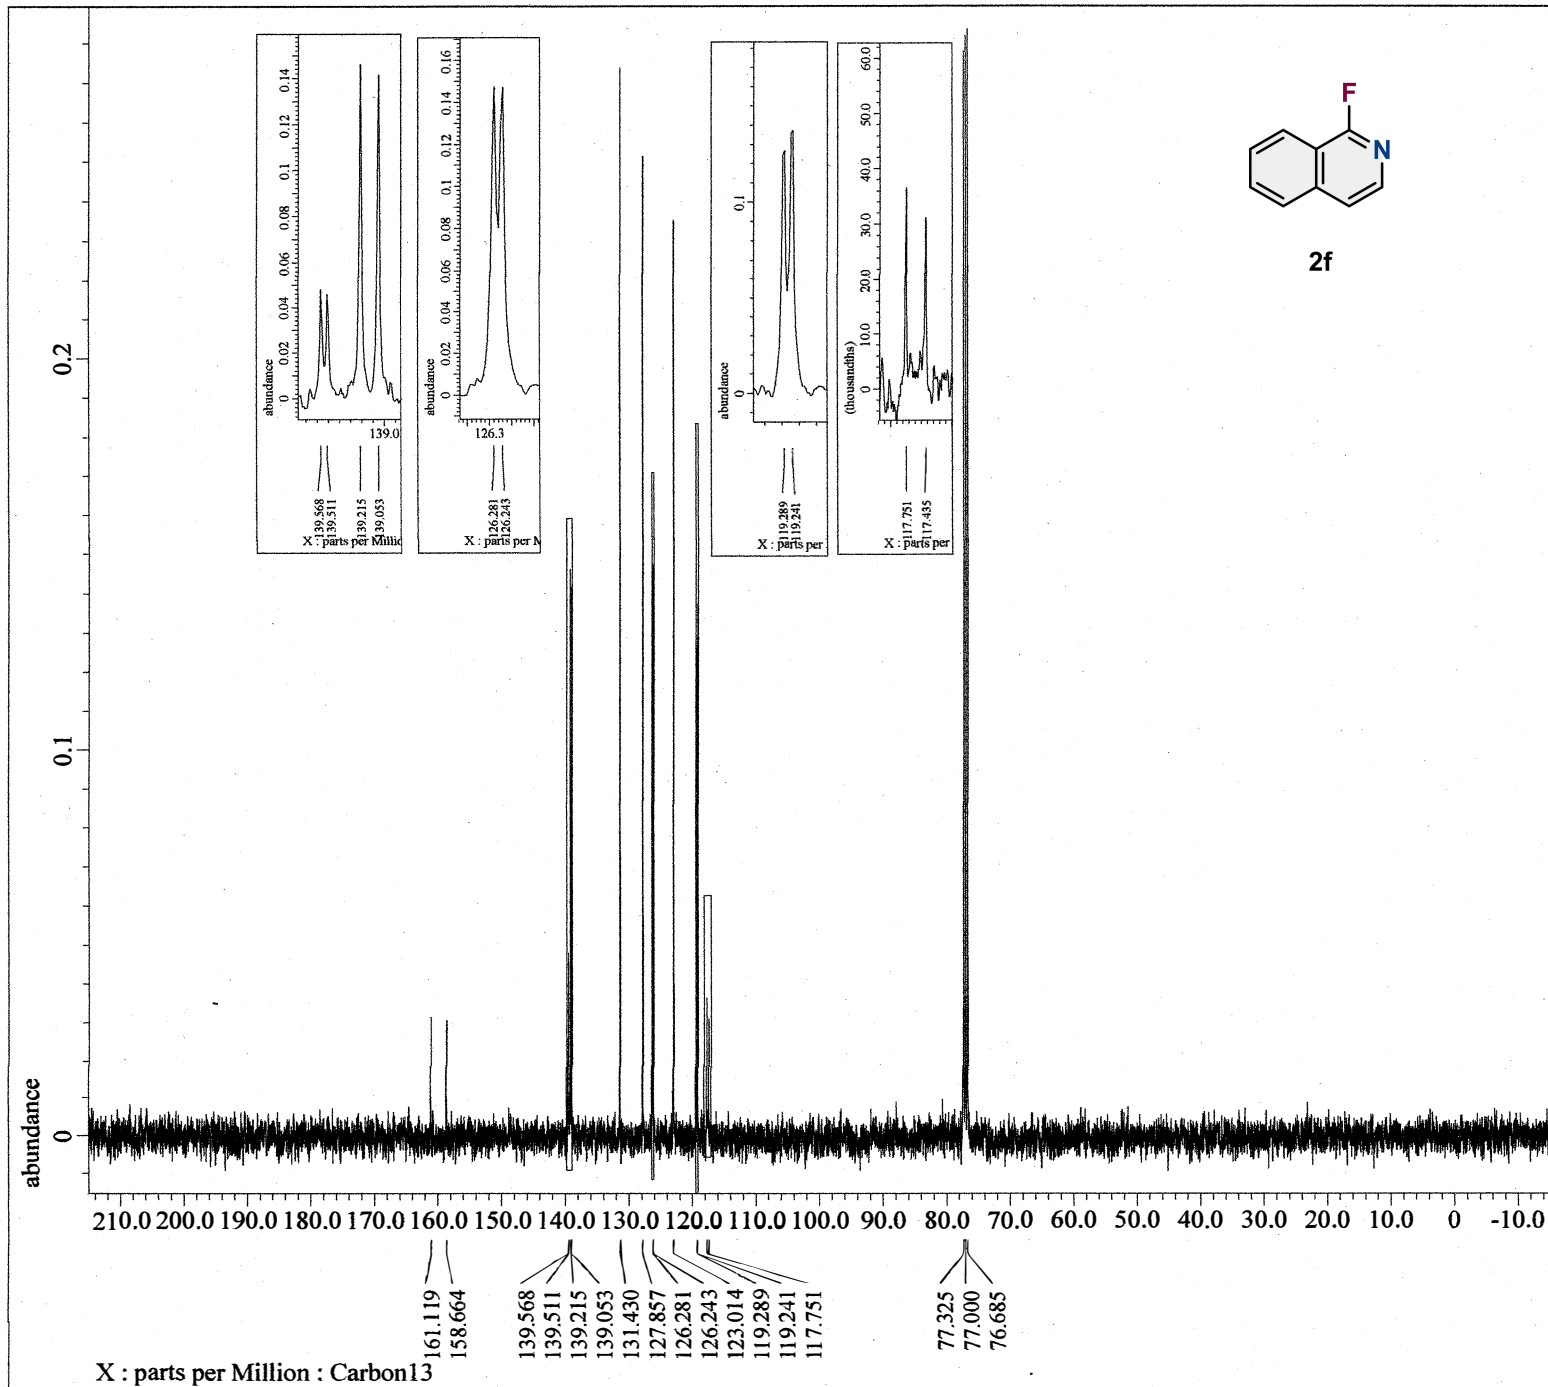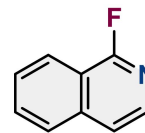

2f

```

---- PROCESSING PARAMETERS ----
dc balance( 0, FALSE )
sexp( 2.0[Hz], 0.0[s] )
trapezoid( 0[%], 0[%], 80[%], 100[%] )
zerofill( 1, TRUE )
fft( 1, TRUE, TRUE )
machinephase
ppm

```

Derived from: MKN306-pure Carbon-3-1.jdf

```

Filename      = MKN306-pure_Carbon-3-2.jdf
Author       = element
Experiment   = carbon.jxp
Sample Id    = MKN306-pure
Solvent      = CHLOROFORM-D
Actual Start Time = 24-FEB-2024 14:10:38
Revision_Time = 17-JUN-2024 12:25:05

```

```

Comment      = single pulse decoupled gat
Data Format   = 1D COMPLEX
Dim_Size     = 26214
X_Domain     = Carbon
Dim_Title    = Carbon13
Dim_Units    = [ppm]
Dimensions   = X
Site         = JNM-ECS400
Spectrometer = DELTA2_NMR

```

```

Field_Strength = 9.37221[T] (400[MHz])
X_Acq_Duration = 1.04333312[s]
X_Domain       = 13C
X_Freq         = 100.33735165[MHz]
X_Offset       = 100.0[ppm]
X_Points       = 32768
X_Prescans     = 4
X_Resolution   = 0.95846665[Hz]
X_Sweep        = 31.40703518[kHz]
X_Sweep_Clippped = 25.12562814[kHz]
Irr_Domain     = Proton
Irr_Freq       = 399.03472754[MHz]
Irr_Offset     = 5.0[ppm]
Clipped        = FALSE
Scans          = 64
Total_Scans    = 64

```

```

Relaxation_Delay = 2[s]
Recvr_Gain       = 50
Temp_Get         = 18.3[dc]
X_90_Width      = 10.9[us]
X_Acq_Time      = 1.04333312[s]
X_Angle         = 30[deg]
X_Atn           = 5.4[db]
X_Pulse         = 3.63333333[us]
Irr_Atn_Dec     = 25.823[db]
Irr_Atn_No     = 25.823[db]
Irr_Noise       = WALTZ
Irr_Pwidth      = 0.115[ms]
Decoupling      = TRUE
Initial_Wait    = 1[s]
Noe              = TRUE
Noe_Time        = 2[s]
Repetition_Time = 3.04333312[s]

```

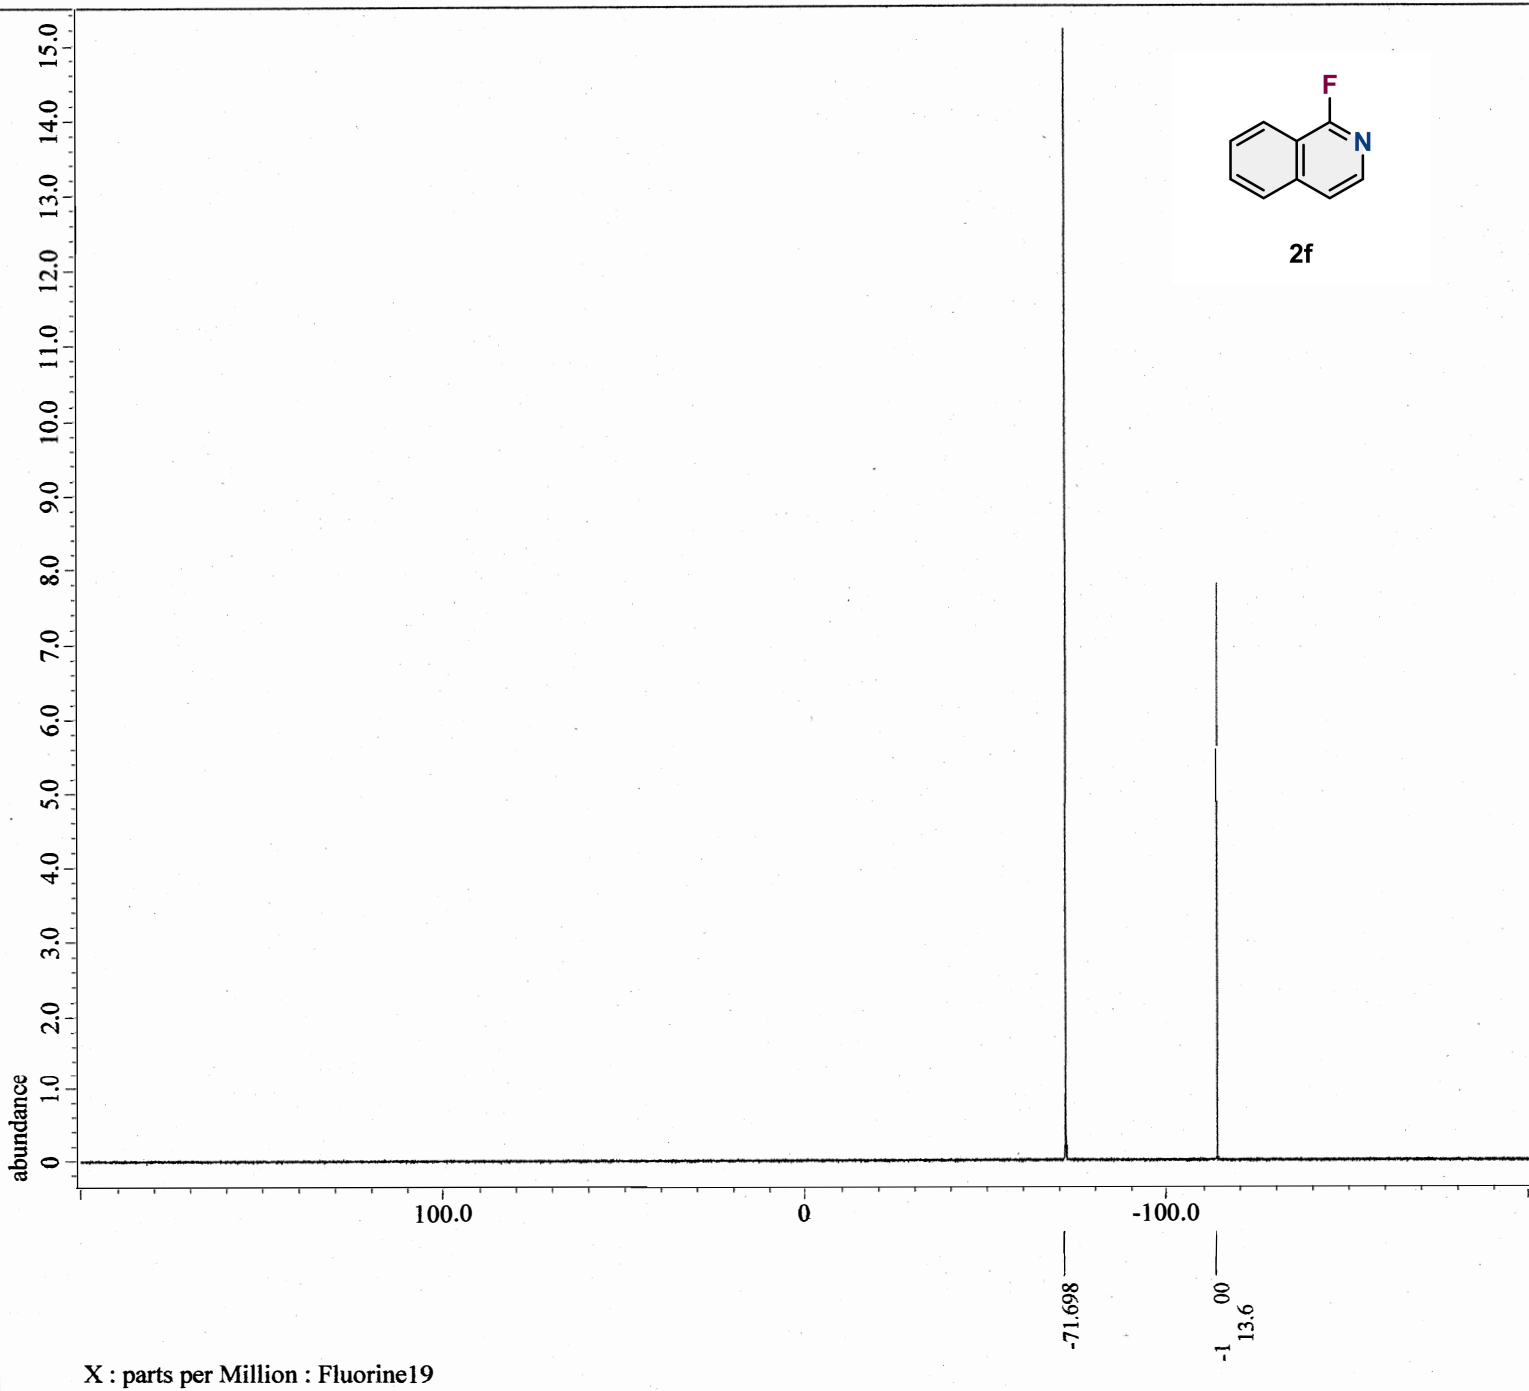

```

---- PROCESSING PARAMETERS ----
dc_balance( 0, FALSE )
sexp( 0.2[Hz], 0.0[s] )
trapezoid( 0[%], 0[%], 80[%], 100[%] )
zerofill( 1, TRUE )
blip( 16, 64, 30 )
fft( 1, TRUE, TRUE )
machinephase
ppm

```

Derived from: MKN 306pure-int single pulse-1-1

```

Filename      = MKN 306-pure-int_single_pul
Author       = element
Experiment   = single_pulse.jxp
Sample Id    = MKN 306-pure-int
So Vent      = CHLOROFORM-D
Actual Start Time = 24-FEB-2024 13:18:27
Revision Time = 17-JUN-2024 12:29:14

```

```

Comment      = single pulse
Data Format   = 1D COMPLEX
Dim Size     = 13 107
X Domain     = Fluorine19
Dim Title    = Fluorine19
Dim Units    = [ppm]
Dimensions   = X
Site         = JNM-ECS400
Spectrometer = DELTA2_NMR

```

```

Field Strength = 9.37221[T] (400[MHz])
X_Acq_Duration = 86.50752[ms]
X_Domain       = 19F
X_Freq         = 375.46772873[MHz]
X_Offset       = 0[ppm]
X_Points       = 16384
X_Prescans     = 1
X_Resolution   = 11.55968868[Hz]
X_Sweep        = 189.39393939[kHz]
X_Sweep_Clippped = 151.51515152[kHz]
Irr_Domain     = Fluorine19
Irr_Freq       = 375.46772873[MHz]
Irr_Offset     = 5[ppm]
Tri_Domain     = Fluorine19
Tri_Freq       = 375.46772873[MHz]
Tri_Offset     = 5[ppm]
Clipped        = FALSE
Scans          = 8
Total_Scans    = 8

```

```

Relaxation_Delay = 5[s]
Recvr_Gain       = 44
Temp_Get         = 18.4[dc]
X_90_Width      = 7.6[us]
X_Acq_Time       = 86.50752[ms]
X_Angle         = 45[deg]
X_Atn           = 2.5[dB]
X_Pulse         = 3.8[us]
Irr_Mode        = Off
Tri_Mode        = Off
Date_Presat     = FALSE
Initial_wait     = 1[s]
Repetition Time = 5.08650752 [s]

```

X : parts per Million : Fluorine19



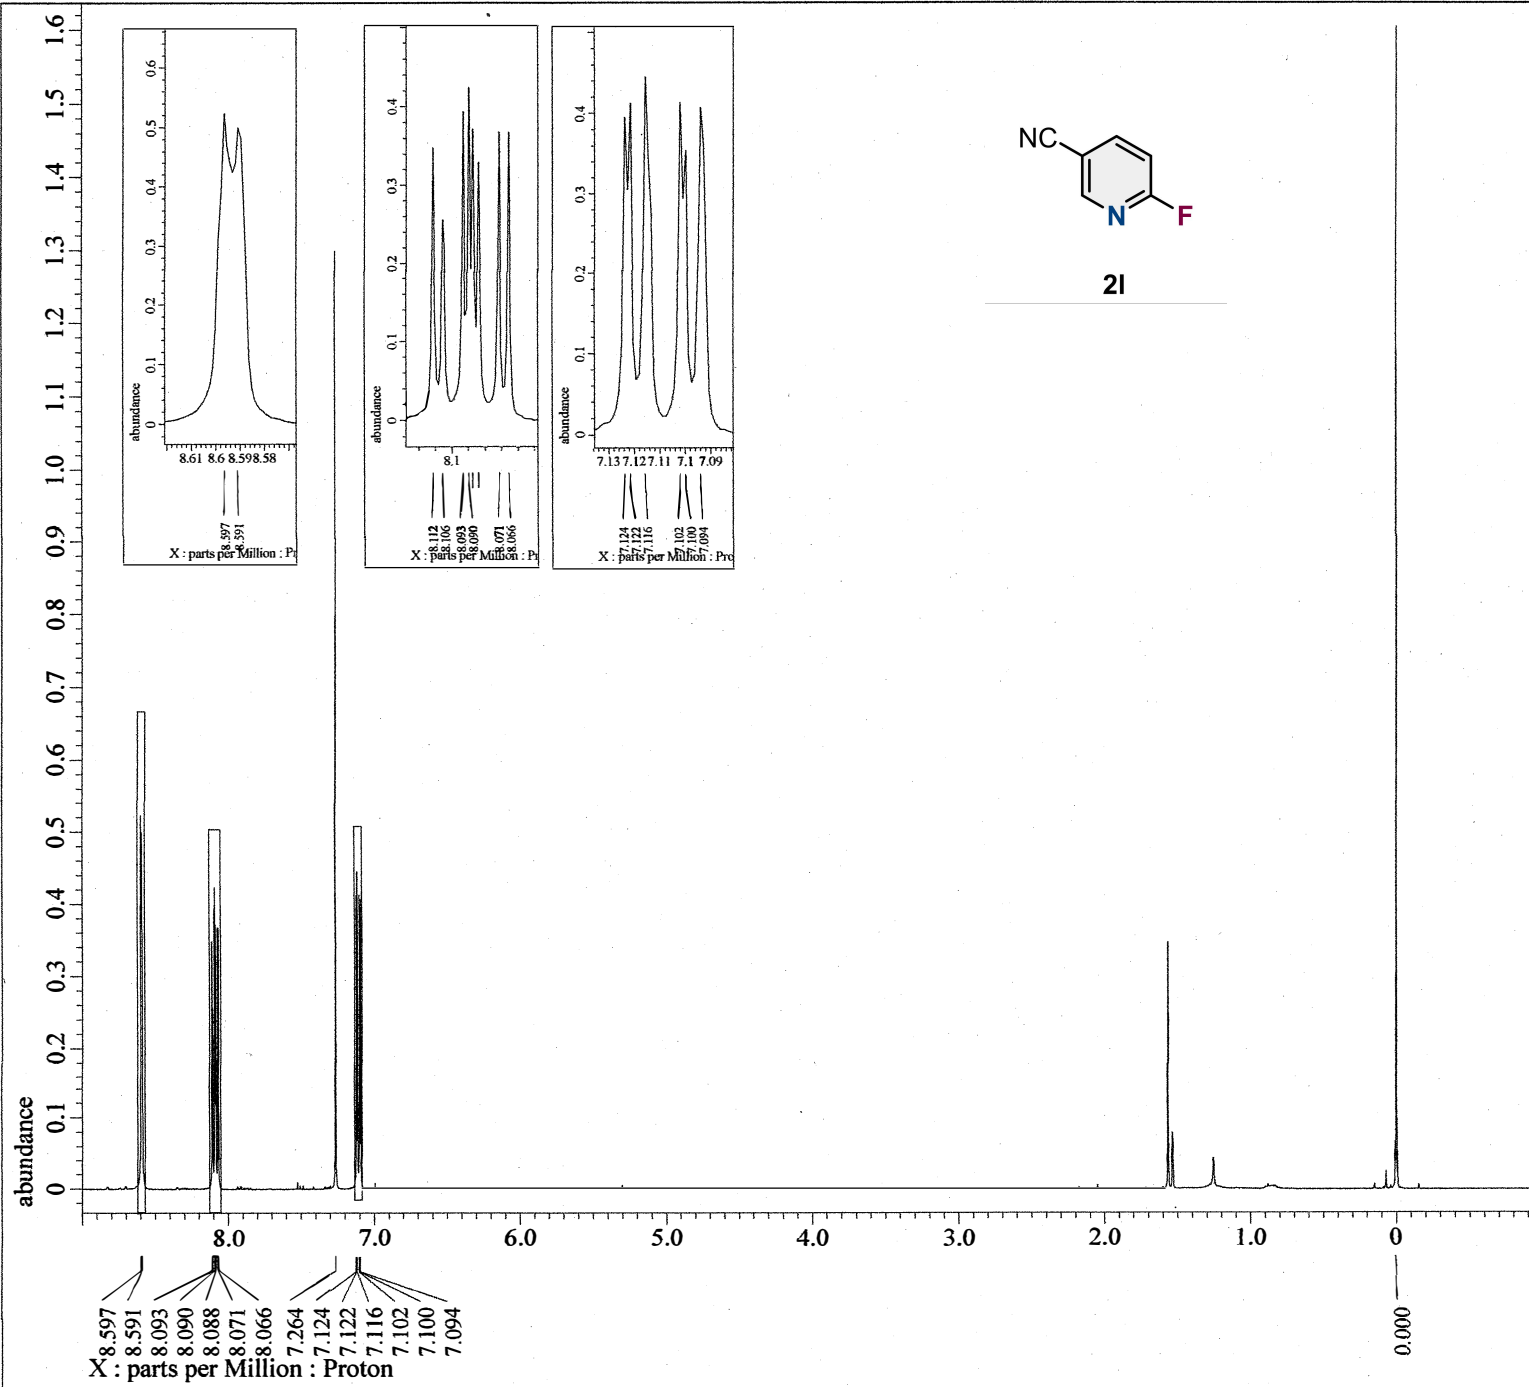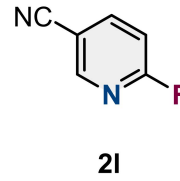

```

---- PROCESSING PARAMETERS ----
sexp( 0.2[Hz], 0.0[s] )
trapezoid( 0[%], 0[%], 80[%], 100[%] )
zerofill( 1, TRUE )
fft( 1, TRUE, TRUE )
machinephase
ppm

```

Derived from: MKN221-pure Proton-1-1.jdf

```

Filename          = MKN221-pure Proton-1-2
Author            = element
Experiment        = proton auto.jxp
Sample_Id        = MKN221-pure
Solvent           = CHLOROFORM-D
Actual_Start_Time = 23-JAN-2024 17:15:19
Revision_Time    = 17-JUN-2024 11:44:47

```

```

Comment          = single pulse
Data_Format      = 1D COMPLEX
Dim_Size         = 13107
X_Domain         = Proton
Dim_Title        = Proton
Dim_Units        = [ppm]
Dimensions       = X
Spectrometer     = DELTA2_NMR

```

```

Field_Strength   = 9.2982153[T] (400[MHz])
X_Acq_Duration   = 2.20725248[s]
X_Domain         = Proton
X_Freq           = 395.88430144[MHz]
X_Offset         = 5[ppm]
X_Points         = 16384
X_Prescans       = 1
X_Resolution     = 0.45305193[Hz]
X_Sweep          = 7.42280285[kHz]
X_Sweep_Clipped = 5.93824228[kHz]
Irr_Domain       = Proton
Irr_Freq         = 395.88430144[MHz]
Irr_Offset       = 5[ppm]
Tri_Domain       = Proton
Tri_Freq         = 395.88430144[MHz]
Tri_Offset       = 5[ppm]
Blanking         = 2.0[us]
Clipped          = FALSE
Scans            = 8
Total_Scans      = 8

```

```

Relaxation_Delay = 5[s]
Recvr_Gain       = 56
Temp_Get         = 19.3[dc]
X_90_Width       = 6.34[us]
X_Acq_Time       = 2.20725248[s]
X_Angle          = 45[deg]
X_Atn            = 5[dB]
X_Pulse          = 3.17[us]
Irr_Mode         = Off
Tri_Mode         = Off
Dante_Loop       = 500
Dante_Presat     = FALSE
Decimation_Rate = 0
Initial_Wait     = 1[s]
Phase            = {0, 90, 270, 180, 180,

```

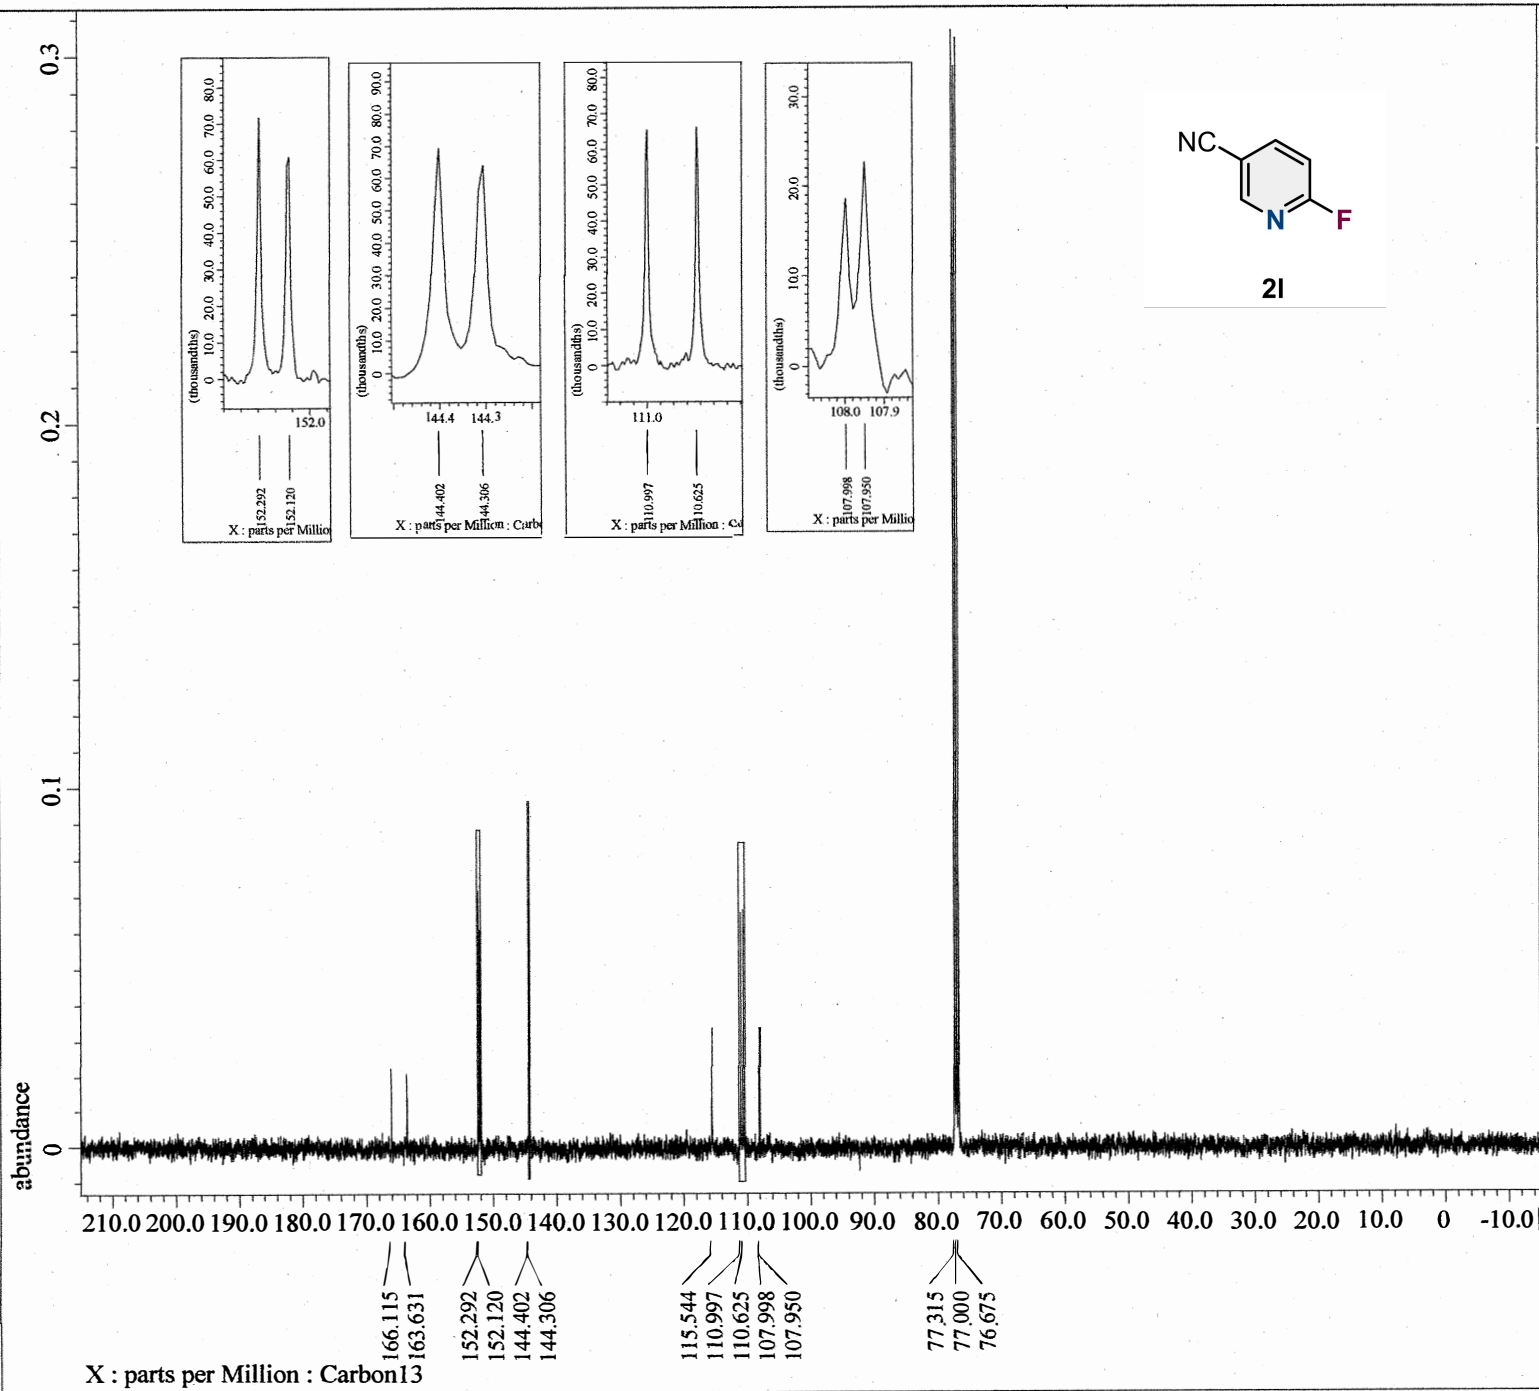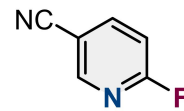

21

```

---- PROCESSING PARAMETERS ----
dc balance( 0, FALSE )
sexp( 2.0[Hz], 0.0[s] )
trapezoid( 0[%], 0[%], 80[%], 100[%] )
zerofill( 1, TRUE )
fft( 1, TRUE, TRUE )
machinephase
ppm

```

Derived from: MKN221-pure Carbon-1-1.jdf

```

Filename      = MKN221-pure_Carbon-1-2.jdf
Author       = element
Experiment   = carbon.jxp
Sample_Id    = MKN221-pure
Solvent      = CHLOROFORM-D
Actual_Start_Time = 23-JAN-2024 18:56:15
Revision_Time = 17-JUN-2024 11:53:19

```

```

Comment      = single pulse decoupled gat
Data_Format  = 1D COMPLEX
Dim_Size     = 26214
X_Domain     = Carbon
Dim_Title    = Carbon13
Dim_Units    = [ppm]
Dimensions   = X
Site         = JNM-ECS400
Spectrometer = DELTA2_NMR

```

```

Field_Strength = 9.37221[T] (400[MHz])
X_Acq_Duration = 1.04333312[s]
X_Domain       = 13C
X_Freq         = 100.33735165[MHz]
X_Offset       = 100.0[ppm]
X_Points       = 32768
X_Prescans     = 4
X_Resolution   = 0.95846665[Hz]
X_Sweep        = 31.40703518[kHz]
X_Sweep_Clippped = 25.12562814[kHz]
Irr_Domain     = Proton
Irr_Freq       = 399.03472754[MHz]
Irr_Offset     = 5.0[ppm]
Clipped        = FALSE
Scans          = 256
Total_Scans    = 256

```

```

Relaxation_Delay = 2[s]
Recvr Gain       = 50
Temp_Get         = 19.7[dC]
X_90_Width       = 10.9[us]
X_Acq_Time       = 1.04333312[s]
X_Angle          = 30[deg]
X_Atn            = 5.4[dB]
X_Pulse          = 3.63333333[us]
Irr_Atn_Dec     = 25.823[dB]
Irr_Atn_No     = 25.823[dB]
Irr_Noise       = WALTZ
Irr_Pwidth      = 0.115[ms]
Decoupling       = TRUE
Initial_Wait     = 1[s]
Noe              = TRUE
Noe_Time        = 2[s]
Repetition_Time = 3.04333312[s]

```

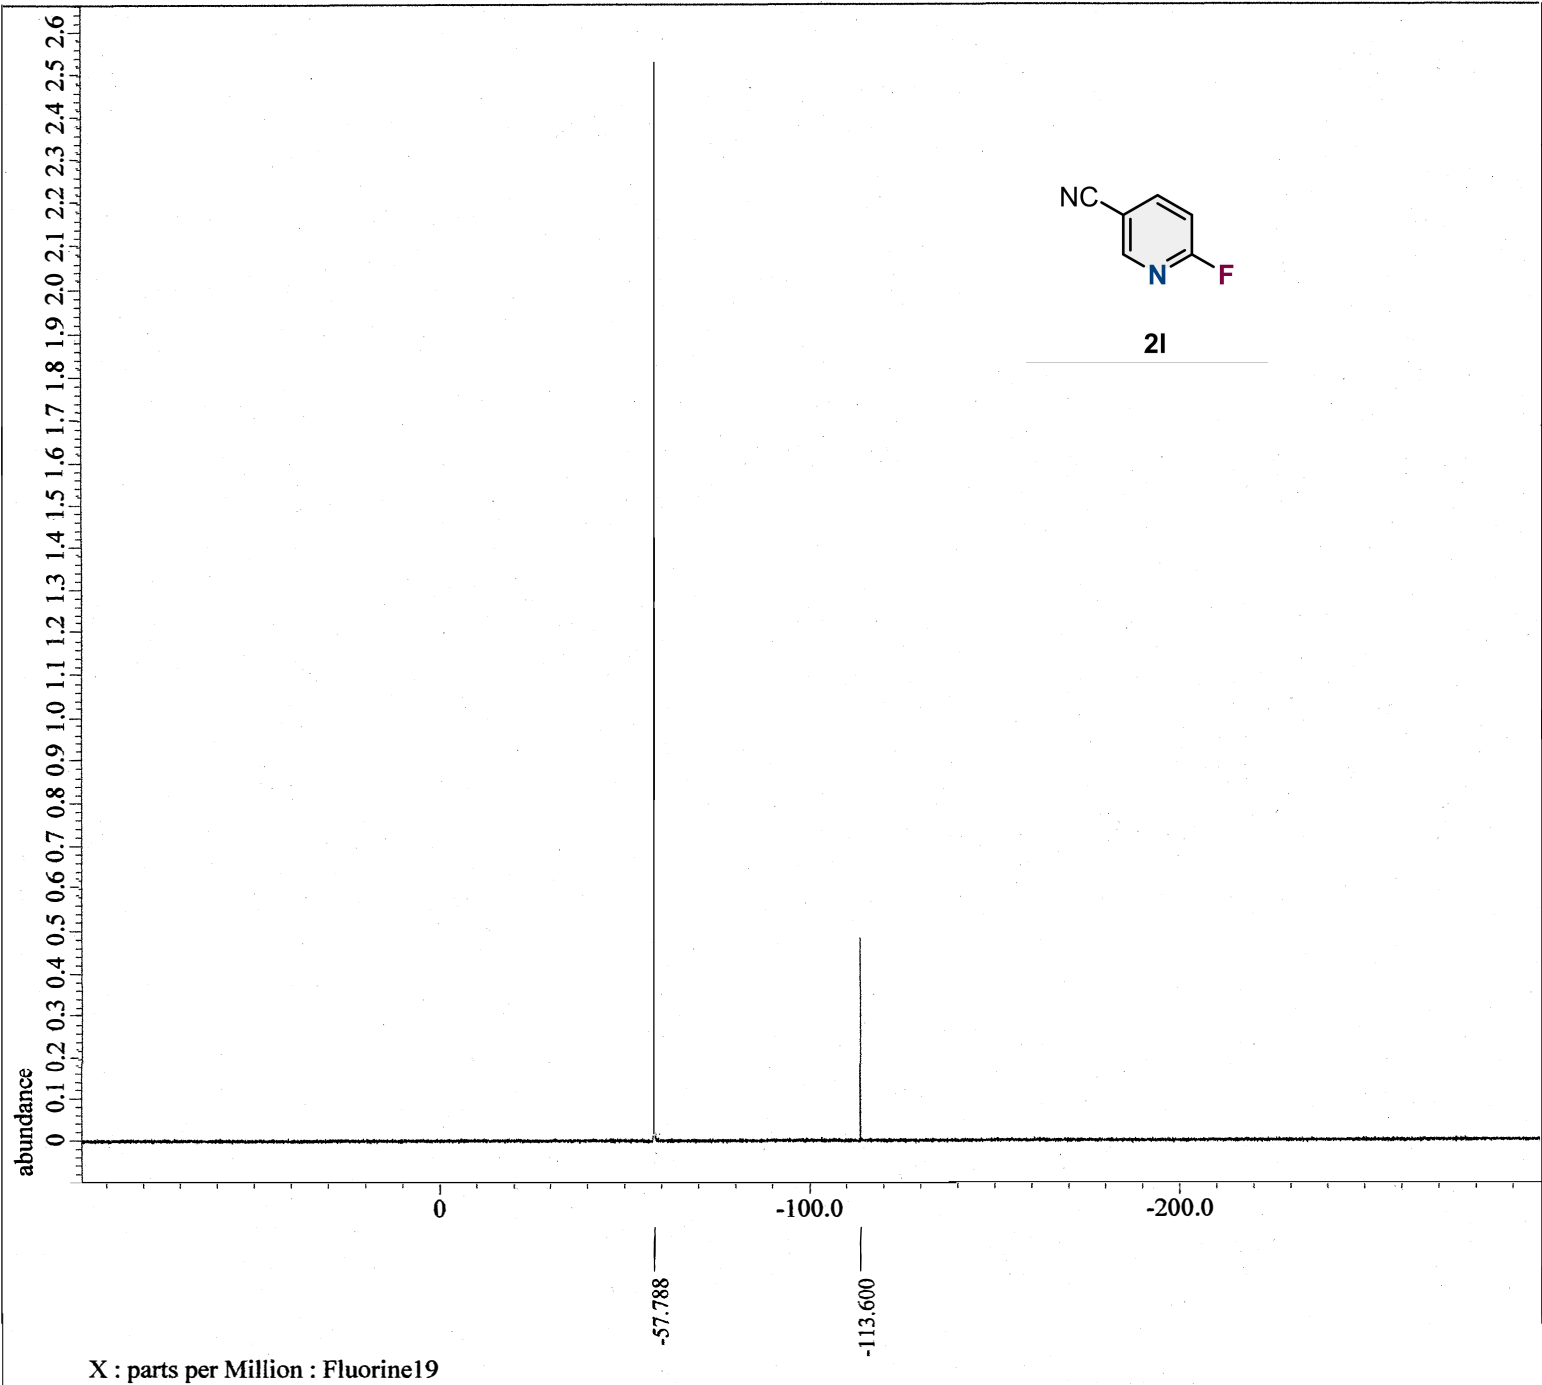

```

---- PROCESSING PARAMETERS ----
sexp( 0.2[Hz], 0.0[s] )
trapezoid( 0[%], 0[%], 80[%], 100[%] )
zerofill( 1 )
blip( 16, 64, 30 )
fft( 1, TRUE, TRUE )
machinephase
ppm

```

```

Filename           = MKN221-pure-int_ sigle
Author             = element
Experiment         = single_pulse.jxp
Sample_Id         = MKN221-pure-int
Solvent           = CHLOROFORM-D
Actual_Start Time = 23-JAN-2024 17:28:53
Revision_T ime    = 17-JUN-2024 11:57:29

```

```

Comment           = single pulse
Data Format       = 1D COMPLEX
Dim_Size         = 13107
X_Domain         = Fluorine19
Dim_Title        = Fluorine19
Dim_Units        = [ppm]
Dimensions       = X
Spectrometer     = DELTA2_NMR

```

```

Field_Strength   = 9.2982153[T] (400[MHz]
X_Acq_Duration   = 89.12896[ms]
X_Domain         = Fluorine19
X_Freq           = 372.50336686[MHz]
X_Offset         = -100[ppm]
X_Points         = 16384
X_Prescans       = 1
X_Resolution     = 11.21969784[Hz]
X_Sweep          = 183.82352941[kHz]
X_Sweep_Clipped = 147.05882353[kHz]

```

```

Irr_Domain       = Fluorine19
Irr_Freq         = 372.50336686[MHz]
Irr_Offset       = 5[ppm]
T ri_Domain     = Fluorine19
T ri_Freq       = 372.50336686[MHz]
T ri_Offset     = 5[ppm]
Blanking         = 2.0[us]
Clipped         = FALSE
Scans           = 8
Total_Scans     = 8

```

```

Relaxation_D eay = 5[s]
Recvr Gain       = 56
Temp_Get         = 18.8[dC]
X_90_Width      = 8.03[us]
X_Acq_Time      = 89.12896[ms]
X_Angle         = 45[deg]
X_Atn           = 5[dB]
X_Pulse         = 4.015[us]
Irr_Mode        = Off
T ri_Mode       = Off
Dante_Loop      = 500
Dante_Preset    = FALSE
Decimation_Rate = 0
Initial_Wait    = 1[s]
Phase           = {0, 90, 270, 180, 180,

```

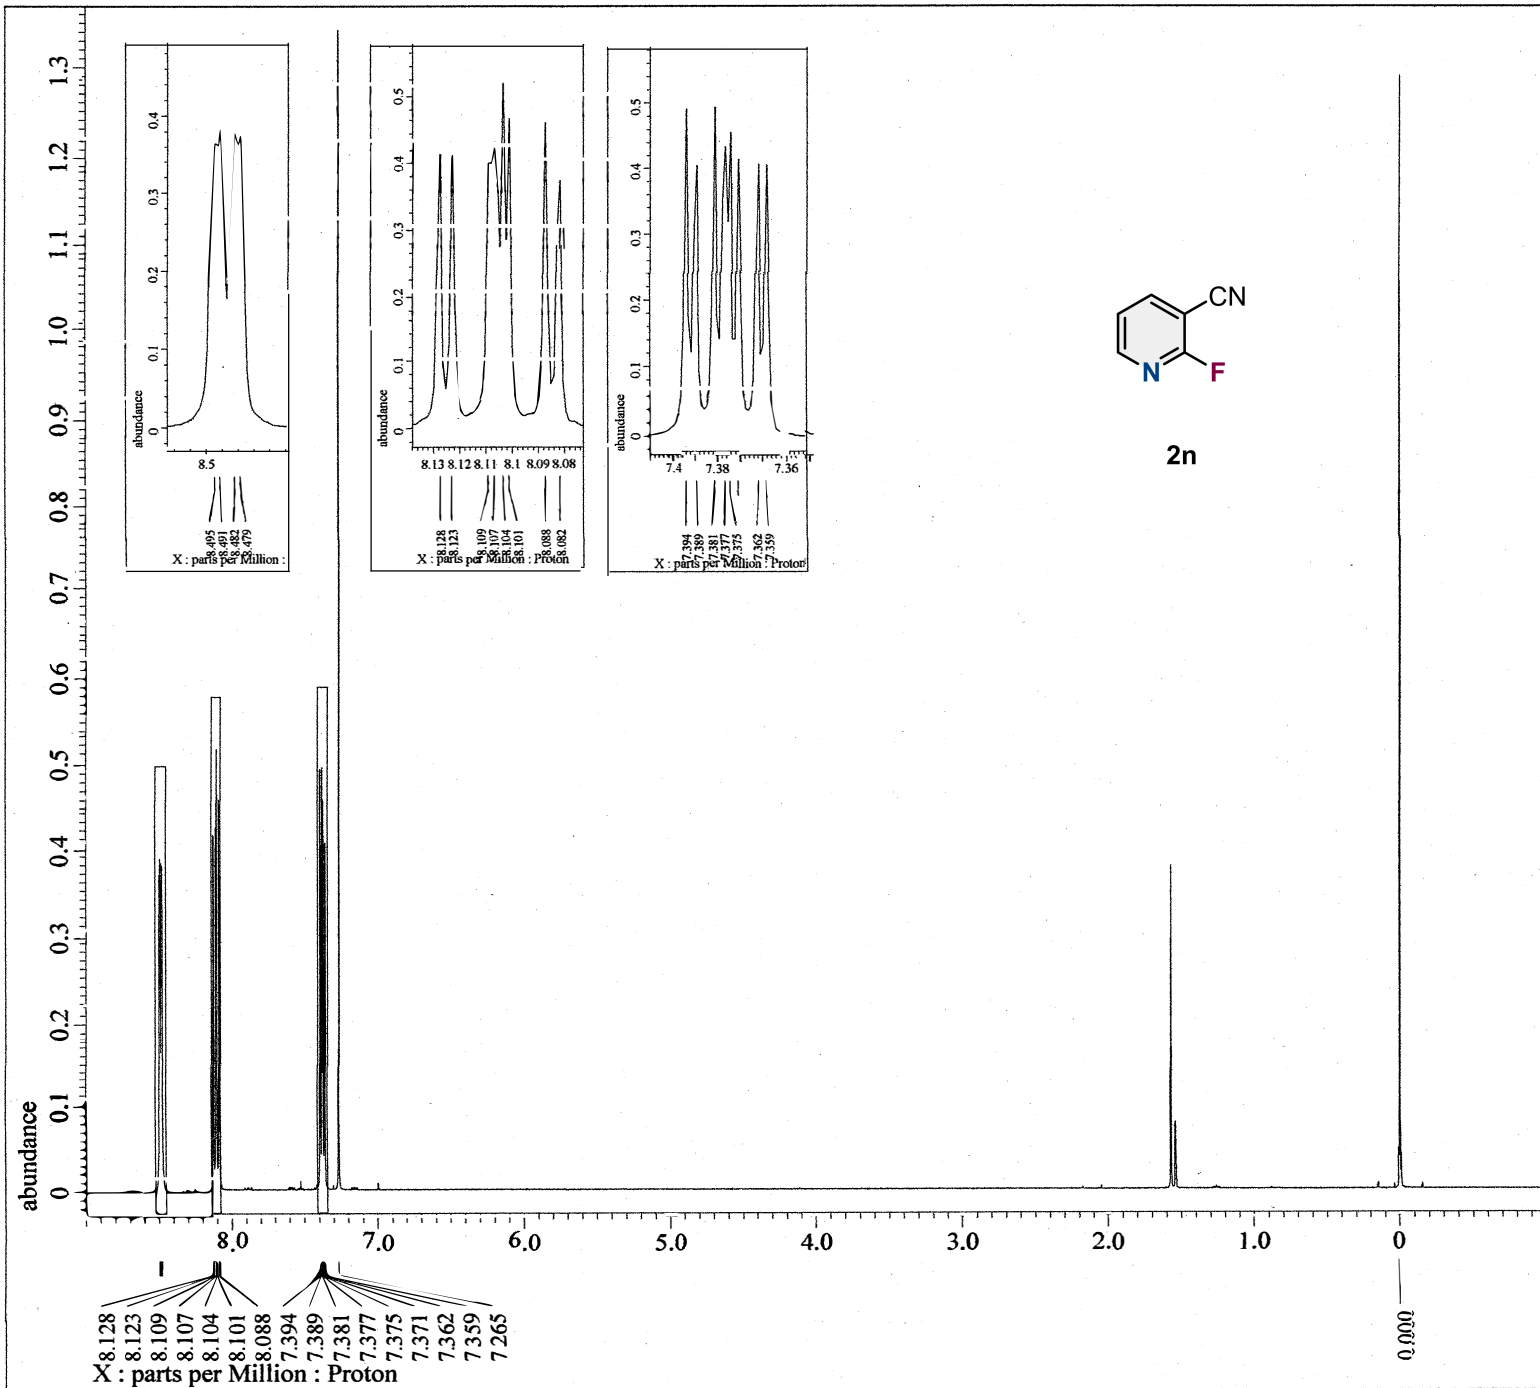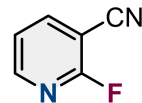

2n

---- PROCESSING PARAMETERS ----  
 sexp( 0.2[Hz], 0.0[s] )  
 trapezoid( 0[%], 0[%], 80[%], 100[%] )  
 zerofill( 1, TRUE )  
 fft( 1, TRUE, TRUE )  
 machinephase  
 ppm

Derived from: MKN240-pure Proton-1-1.jdf

Filename = MKN240-pure\_Proton-1-2  
 Author = element  
 Experiment = proton\_auto.jxp  
 Sample\_Id = MKN240-pure  
 Solvent = CHLOROFORM-D  
 Actual\_Start\_Time = 23-JAN-2024 17:22:40  
 Revision\_Time = 17-JUN-2024 11:22:06

Comment = single pulse  
 Data\_Format = 1D COMPLEX  
 Dim\_Size = 13107  
 X\_Domain = Proton  
 Dim\_Title = Proton  
 Dim\_Units = [ppm]  
 Dimensions = X  
 Spectrometer = DELTA2\_MMR

Field\_Strength = 9.2982153[T] (400[MHz])  
 X\_Acq\_Duration = 2.20725248[s]  
 X\_Domain = Proton  
 X\_Freq = 395.88430144[MHz]  
 X\_Offset = 5[ppm]  
 X\_Points = 16384  
 X\_Prescans = 1  
 X\_Resolution = 0.45305193[Hz]  
 X\_Sweep = 7.42280285[kHz]  
 X\_Sweep\_Clippped = 5.93824228[kHz]  
 Irr\_Domain = Proton  
 Irr\_Freq = 395.88430144[MHz]  
 Irr\_Offset = 5[ppm]  
 Tri\_Domain = Proton  
 Tri\_Freq = 395.88430144[MHz]  
 Tri\_Offset = 5[ppm]  
 Blanking = 2.0[us]  
 Clipped = FALSE  
 Scans = 8  
 Total\_Scans = 8

Relaxation\_Delay = 5[s]  
 Recvr\_Gain = 56  
 Temp\_Get = 19[dC]  
 X\_90\_Width = 6.34[us]  
 X\_Acq\_Time = 2.20725248[s]  
 X\_Angle = 45[deg]  
 X\_Atn = 5[dB]  
 X\_Pulse = 3.17[us]  
 Irr\_Mode = Off  
 Tri\_Mode = Off  
 Dante\_Loop = 500  
 Dante\_Presat = FALSE  
 Decimation\_Rate = 0  
 Initial\_Wait = 1[s]  
 Phase = {0, 90, 270, 180, 180}

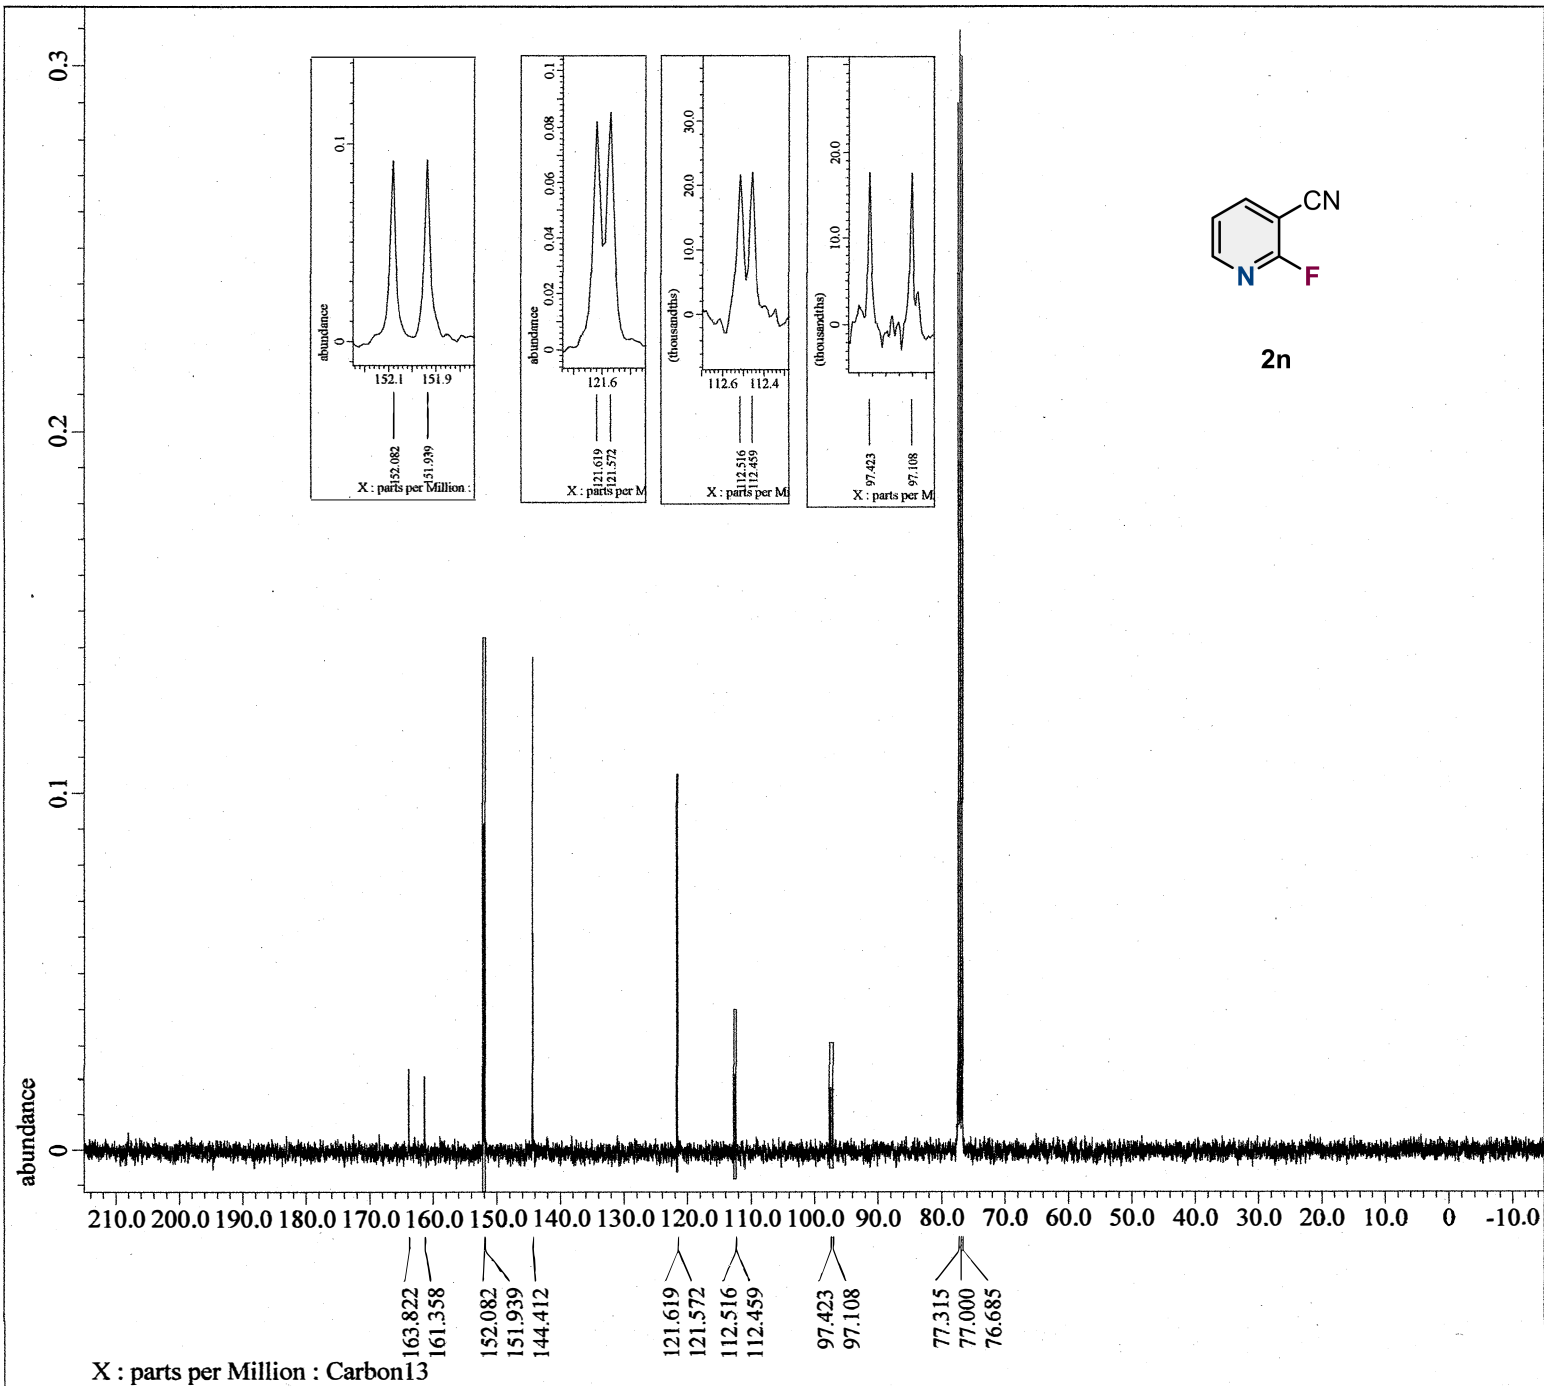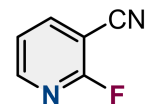

2n

```

---- PROCESSING PARAMETERS ----
dc balance( 0, FALSE )
sexp( 2.0[Hz], 0.0[s] )
trapezoid( 0[%], 0[%], 80[%], 100[%] )
zerofill( 1, TRUE )
fft( 1, TRUE, TRUE )
machinephase
ppm
reference( 77.13146[ppm], 77[ppm] )
thresh( 4.48623[%], 1, )

```

Derived from: MKN240-pure Carbon-1-1.jdf

```

Filename      = MKN240-pure_Carbon-1-2.jdf
Author       = element
Experiment   = carbon.jxp
Sample Id    = MKN240-pure
Solvent      = CHLOROFORM-D
Actual_Start Time = 23-JAN-2024 19:31:00
Revision_Time = 17-JUN-2024 11:29:40

```

```

Comment      = single pulse decoupled gat
Data Format   = 1D COMPLEX
Dim Size     = 26214
X_Domain     = Carbon
Dim Title    = Carbon13
Dim Units    = [ppm]
Dimensions   = X
Site         = JNM-ECS400
Spectrometer = DELTA2_NMR

```

```

Field Strength = 9.37221[T] (400[MHz])
X_Acq_Duration = 1.04333312[s]
X_Domain       = 13C
X_Freq         = 100.33735165[MHz]
X_Offset       = 100.0[ppm]
X_Points       = 32768
X_Prescans     = 4
X_Resolution   = 0.95846665[Hz]
X_Sweep        = 31.40703518[kHz]
X_Sweep_Clipped = 25.12562814[kHz]
Irr_Domain     = Proton
Irr_Freq       = 399.03472754[MHz]
Irr_Offset     = 5.0[ppm]
Clipped        = FALSE
Scans          = 256
Total_Scans    = 256

```

```

Relaxation_Delay = 2[s]
Recvr_Gain       = 50
Temp_Get         = 19.6[dC]
X_90_Width      = 10.9[us]
X_Acq_Time       = 1.04333312[s]
X_Angle          = 30[deg]
X_Atn            = 5.4[dB]
X_Pulse         = 3.63333333[us]
Irr_Atn_Dec     = 25.823[dB]
Irr_Atn_Noise   = 25.823[dB]
Irr_Noise       = WALTZ
Irr_Pwidth      = 0.115[ms]
Decoupling      = TRUE
Initial_Wait    = 1[s]
Noe              = TRUE
Noe_Time        = 2[s]
Repetition_Time = 3.04333312[s]

```

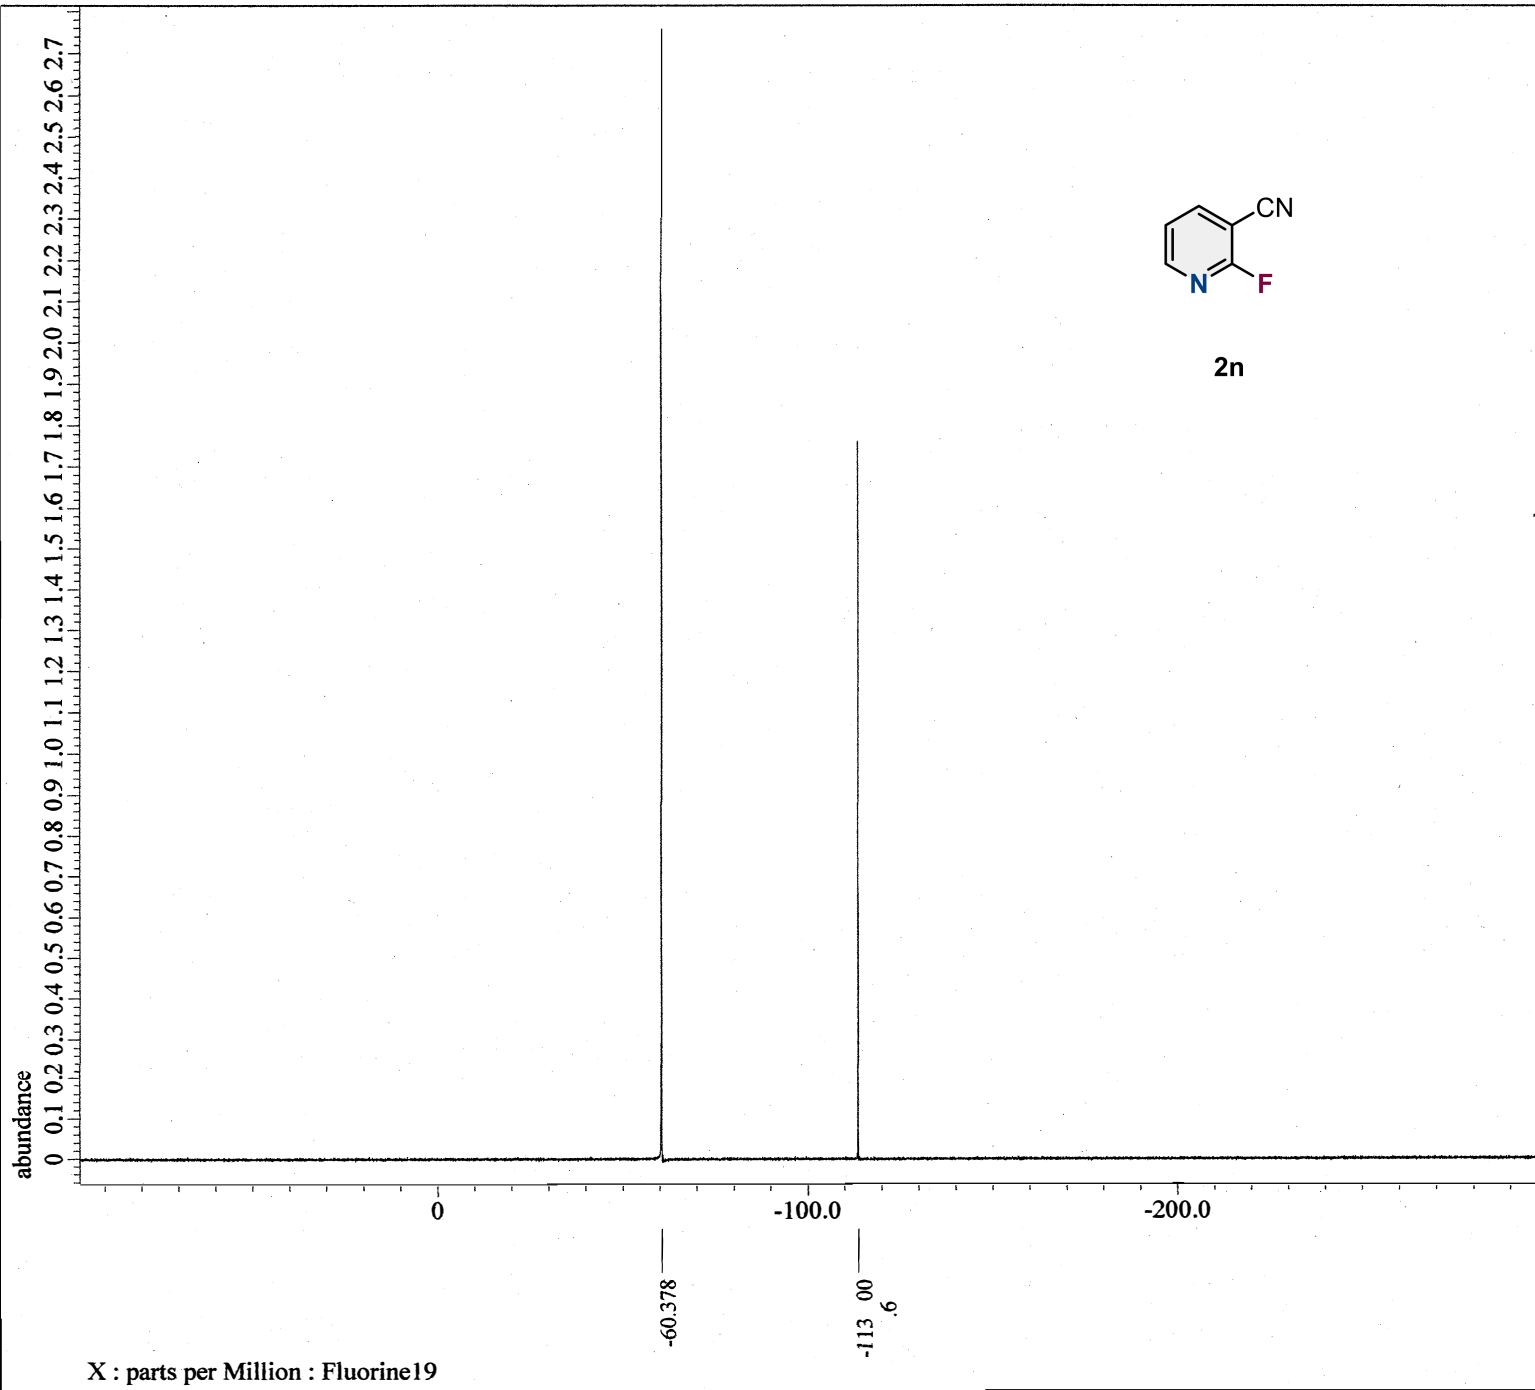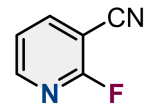

2n

```

---- PROCESSING PARAMETERS ----
sexp( 0.2[Hz], 0.0[s] )
trapezoid( 0[ %],0[ %],80[ %],100[ %] )
zerofill( 1 )
blip( 16, 64, 30 )
fft( 1, TRUE, TRUE )
machinephase
ppm

```

```

Filename           = MKN240-pure-int_single
Author            = element
Experiment         = single_pulse.jxp
Sample_Id         = MKN240-pure-int
Solvent           = CHLOROFORM-D
Actual_Start_Time = 23-JAN-2024 17:33:35
Revision_Time     = 24-JAN-2024 11:59:08

Comment           = single_pulse
Data_Format       = 1D COMPLEX
Dim_Size          = 13107
X_Domain          = Fluorine19
Dim_Title         = Fluorine19
Dim_Units         = [ppm]
Dimensions        = X
Spectrometer      = DELTA2_NMR

Field_Strength    = 9. 298215[T] (400[MHz])
X_Acq_Duration    = 89. 12896 [ms]
X_Domain          = Fluorine19
X_Freq            = 372.50336686[MHz]
X_Offset          = -100[ppm]
X_Points          = 16384
X_Prescans        = 1
X_Resolution      = 11.21969784[Hz]
X_Sweep           = 183.82352941[ kHz]
X_Sweep_Clippped = 147.05 882353[kHz]
Irr_Domain        = Fluorine19
Irr_Freq          = 372.50336686[ MHz]
Irr_Offset        = 5[ppm]
Tri_Domain        = Fluorine19
Tri_Freq          = 372.50336686[ MHz]
Tri_Offset        = 5[ppm]
Blanking          = 2.0[us]
Clipped           = FALSE
Scans             = 8
Total_Scans       = 8

Relaxation_Delay  = 5[ s]
Recvr_Gain        = 56
Temp_Get          = 18.7[dC]
X_90_Width        = 8.03[us]
X_Acq_Time        = 89.12896[ ms]
X_Angle           = 45[deg]
X_Atn             = 5[dB]
X_Pulse           = 4.0 15[us]
Irr_Mode          = Off
Trl_Mode          = Off
Dante_Loop        = 500
Dante_Presat      = FALSE
Decimation_Rate   = 0
Initial_Wait      = 1[ s]
Phase             = {0, 90, 270, 180, 180,

```

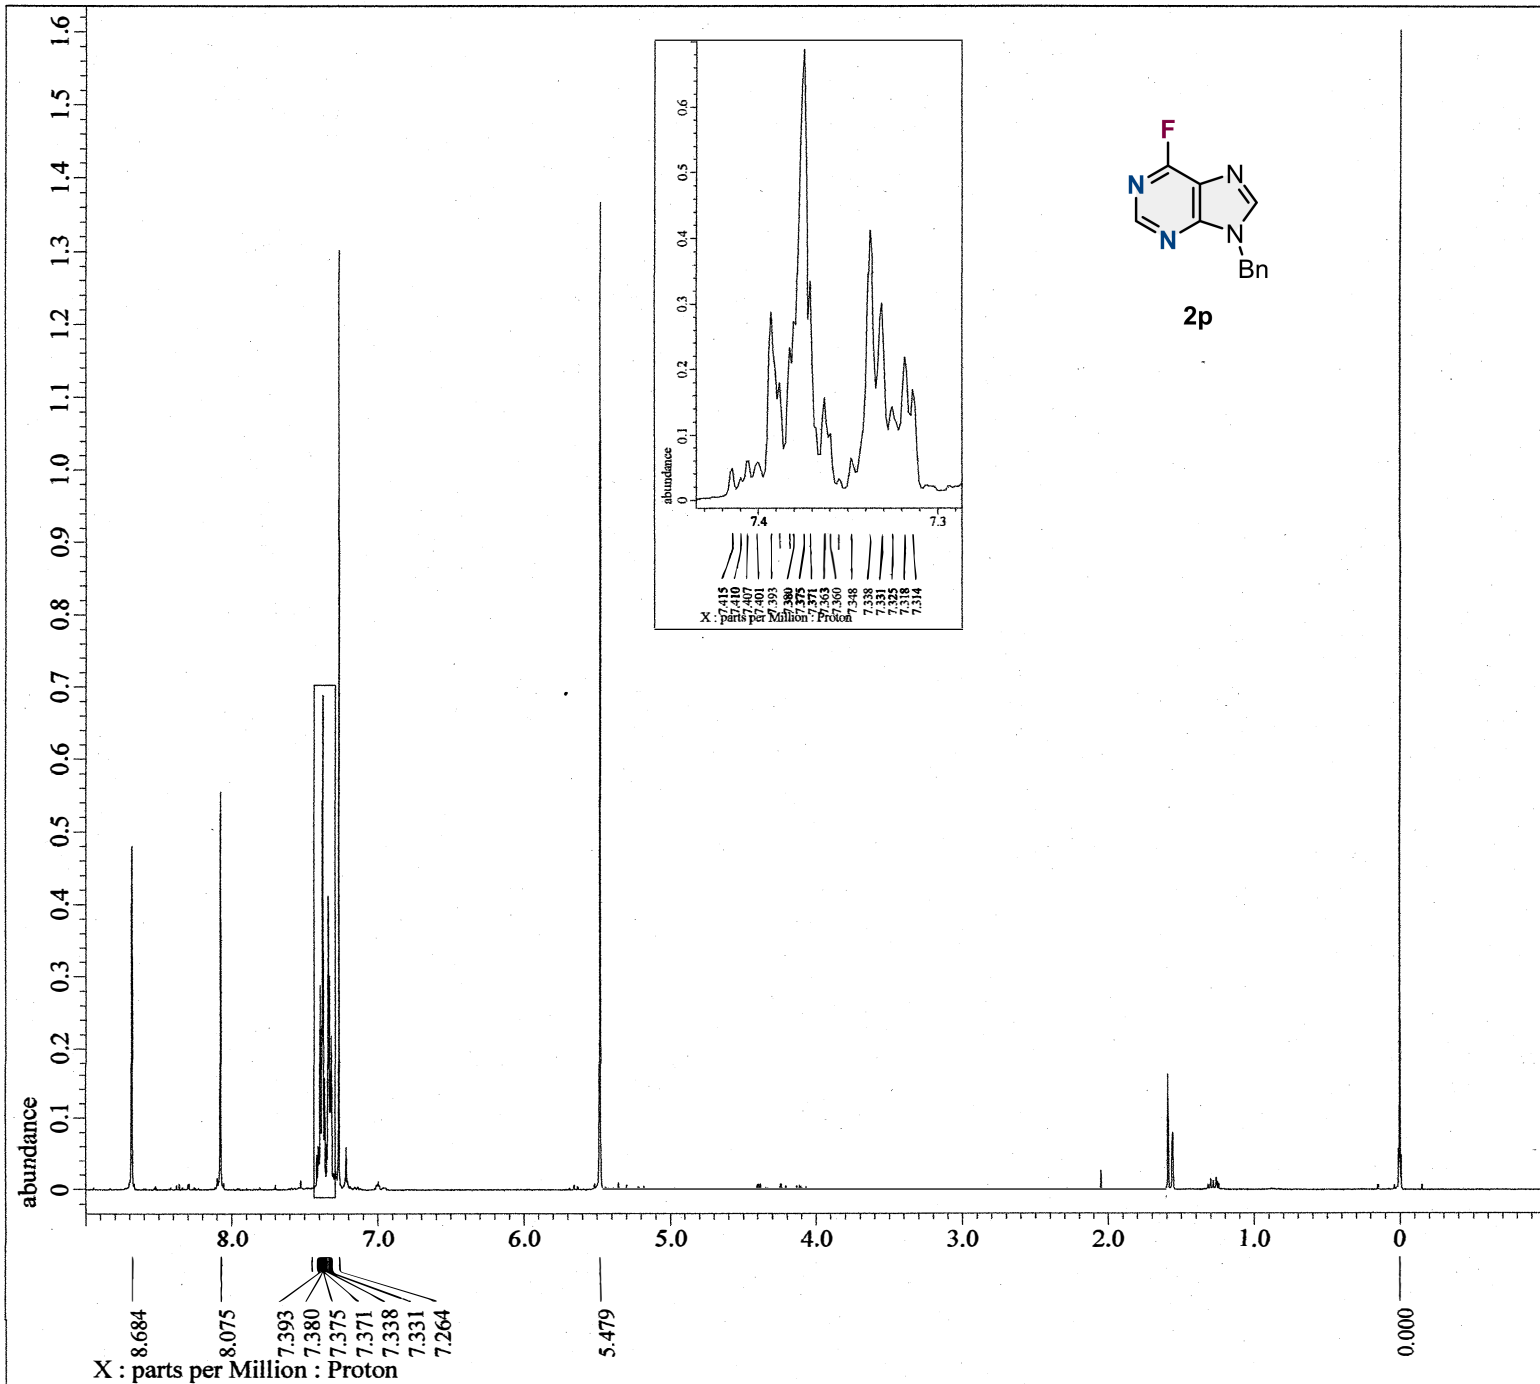

```

---- PROCESSING PARAMETERS ----
sexp( 0.2[Hz], 0.0[s] )
trapezoid( 0[%], 0[%], 80[%], 100[%] )
zerofill( 1, TRUE )
fft( 1, TRUE, TRUE )
machinephase
ppm

Derived from: MKN272-pure Proton-1-1.jdf

Filename           = MKN272-pure_Proton-1-2
Author             = element
Experiment          = proton_auto.jxp
Sample Id          = MKN272-pure
Solvent            = CHLOROFORM-D
Actual Start Time  = 20-JAN-2024 15:44:09
Revision Time      = 17-JUN-2024 10:40:04

Comment            = single pulse
Data Format         = 1D COMPLEX
Dim Size           = 13107
X_Domain           = Proton
Dim Title          = Proton
Dim Units          = [ppm]
Dimensions         = X
Spectrometer       = DELTA2_NMR

Field Strength     = 9.2982153[T] (400[MHz])
X_Acq_Duration     = 2.20725248[s]
X_Domain           = Proton
X_Freq             = 395.88430144[MHz]
X_Offset           = 5[ppm]
X_Points           = 16384
X_Prescans         = 1
X_Resolution       = 0.45305193[Hz]
X_Sweep            = 7.42280285[kHz]
X_Sweep_Clipped   = 5.93824228[kHz]
Irr_Domain         = Proton
Irr_Freq           = 395.88430144[MHz]
Irr_Offset         = 5[ppm]
Tri_Domain         = Proton
Tri_Freq           = 395.88430144[MHz]
Tri_Offset         = 5[ppm]
Blanking           = 2.0[us]
Clipped            = FALSE
Scans              = 8
Total_Scans        = 8

Relaxation_Delay   = 5[s]
Recvr_Gain         = 56
Temp_Get           = 18.9[dc]
X_90_Width         = 6.34[us]
X_Acq_Time         = 2.20725248[s]
X_Angle            = 45[deg]
X_Atn              = 5[dB]
X_Pulse            = 3.17[us]
Irr_Mode           = Off
Tri_Mode           = Off
Dante_Loop         = 500
Dante_Presat       = FALSE
Decimation_Rate    = 0
Initial_Wait       = 1[s]
Phase              = {0, 90, 270, 180, 180,

```

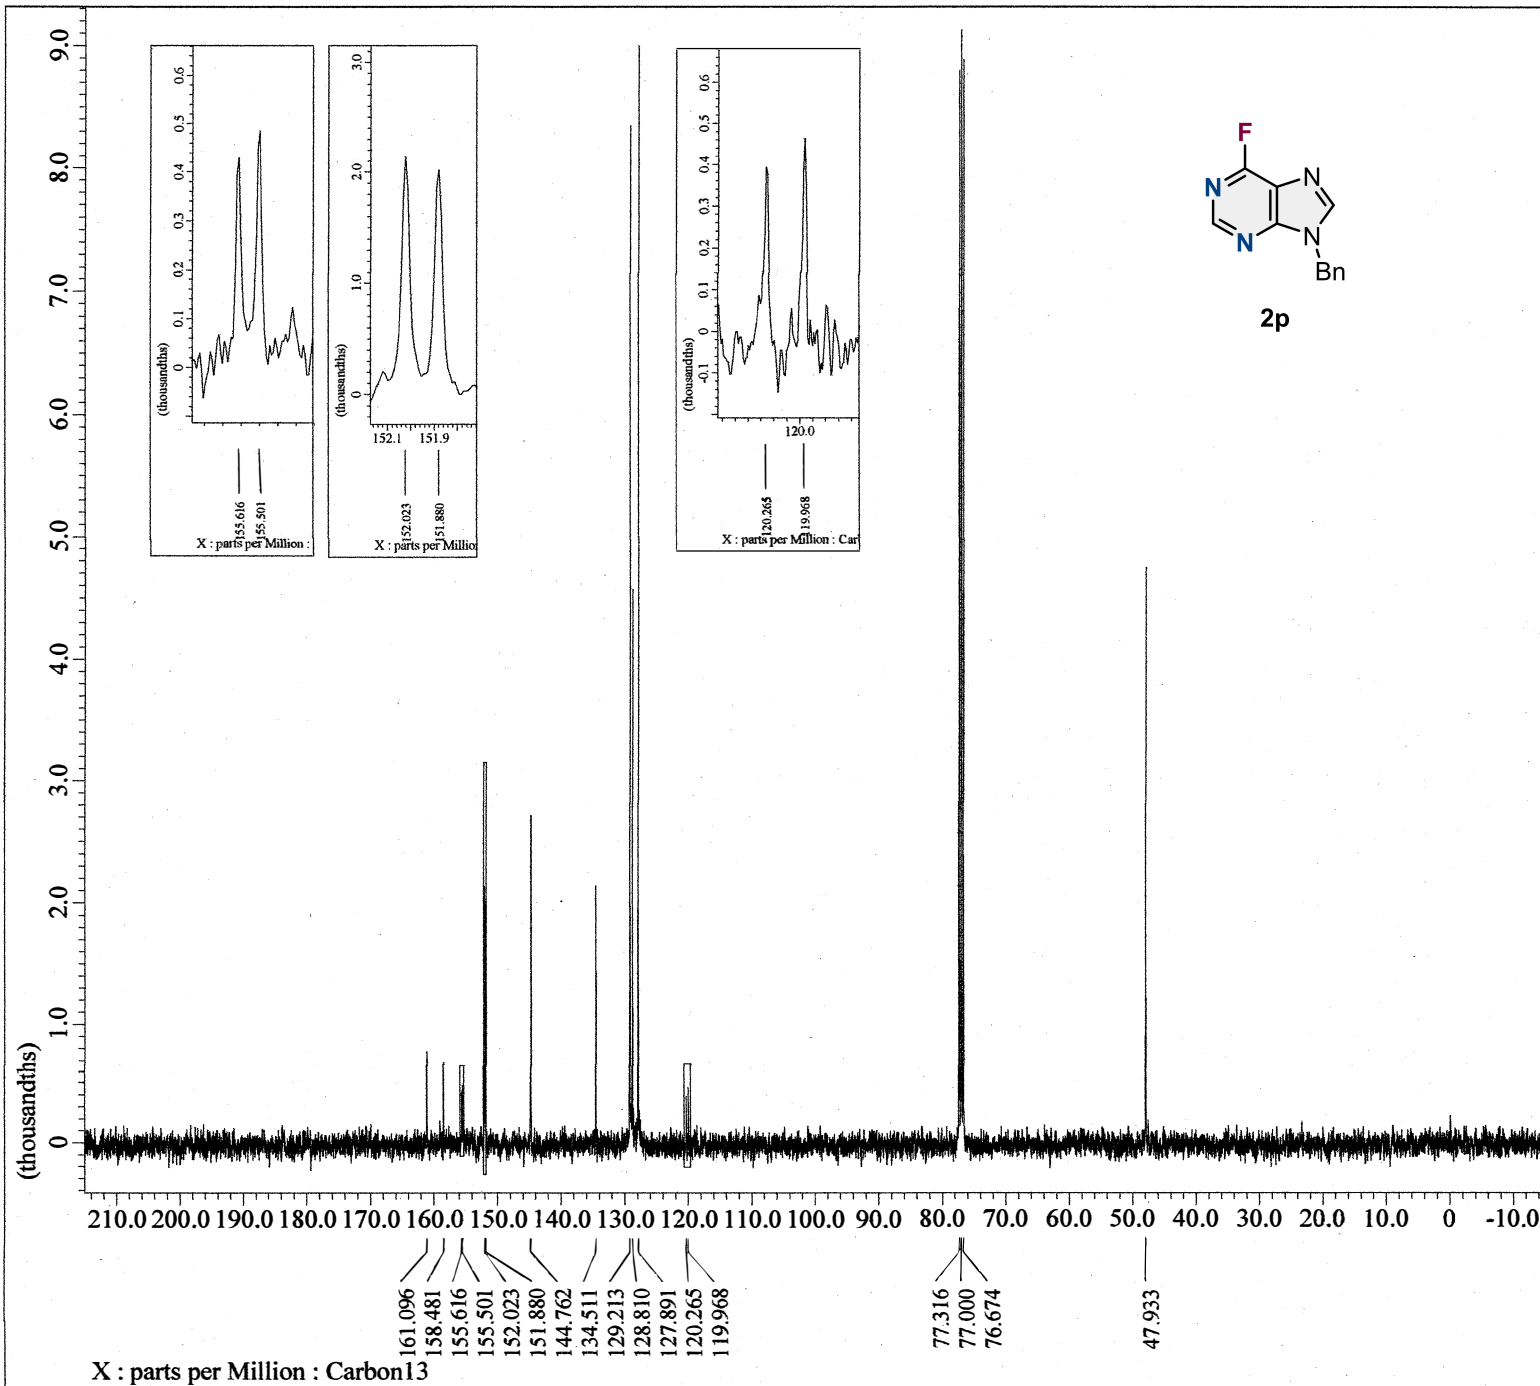

```

---- PROCESSING PARAMETERS ----
sexp( 2.0[Hz], 0.0[s] )
trapezoid( 0[%], 0[%], 80[%], 100[%] )
zerofill( 1, TRUE )
fft( 1, TRUE, TRUE )
machinephase
ppm
reference( 77.15094[ppm], 77[ppm] )
thresh( 2.87842[%], 1, )

```

Derived from: MKN272-pure Carbon-1-1.jdf

```

Filename           = MKN272-pure_Carbon-
Author             = element
Experiment         = carbon_auto.jxp
Sample_Id         = MKN272-pure
Solvent           = CHLOROFORM-D
Actual_Start_Time = 20-JAN-2024 16:03:2
Revision_Time     = 17-JUN-2024 11:12:5

Comment           = single pulse decoupl
Data_Format      = 1D COMPLEX
Dim_Size         = 26214
X_Domain         = Carbon13
Dim_Title        = Carbon13
Dim_Units        = [ppm]
Dimensions       = X
Spectrometer     = DELTA2_NMR

Field_Strength   = 9.2982153[T] (400[M
X_Acq_Duration   = 1.048576[s]
X_Domain         = Carbon13
X_Freq           = 99.54517646[MHz]
X_Offset         = 100[ppm]
X_Points         = 32768
X_Prescans       = 4
X_Resolution     = 0.95367432[Hz]
X_Sweep          = 31.25[kHz]
X_Sweep_Clipped = 25[kHz]
Irr_Domain       = Proton
Irr_Freq         = 395.88430144[MHz]
Irr_Offset       = 5[ppm]
Blanking         = 5.0[us]
Clipped          = FALSE
Scans            = 256
Total_Scans      = 256

Relaxation_Delay = 2[s]
Recvr_Gain       = 50
Temp_Get         = 18.8[dC]
X_90_Width       = 11.5[us]
X_Acq_Time       = 1.048576[s]
X_Angle          = 30[deg]
X_Atn            = 9[dB]
X_Pulse          = 3.83333333[us]
Irr_Atn_Dec      = 30.172[dB]
Irr_Atn_Dec_Calc = 30.172[dB]
Irr_Atn_Dec_Default_Calc = 30.172[dB]
Irr_Atn_Noise   = 30.172[dB]
Irr_Dec_Bandwidth_Hz = 4.7826087[kHz]
Irr_Dec_Bandwidth_Ppm = 12.08082432[ppm]
Irr_Dec_Freq     = 395.88430144[MHz]
Irr_Dec_Merit_Factor = 2.2
Irr_Decoupling  = TRUE
Irr_Noise       = TRUE

```



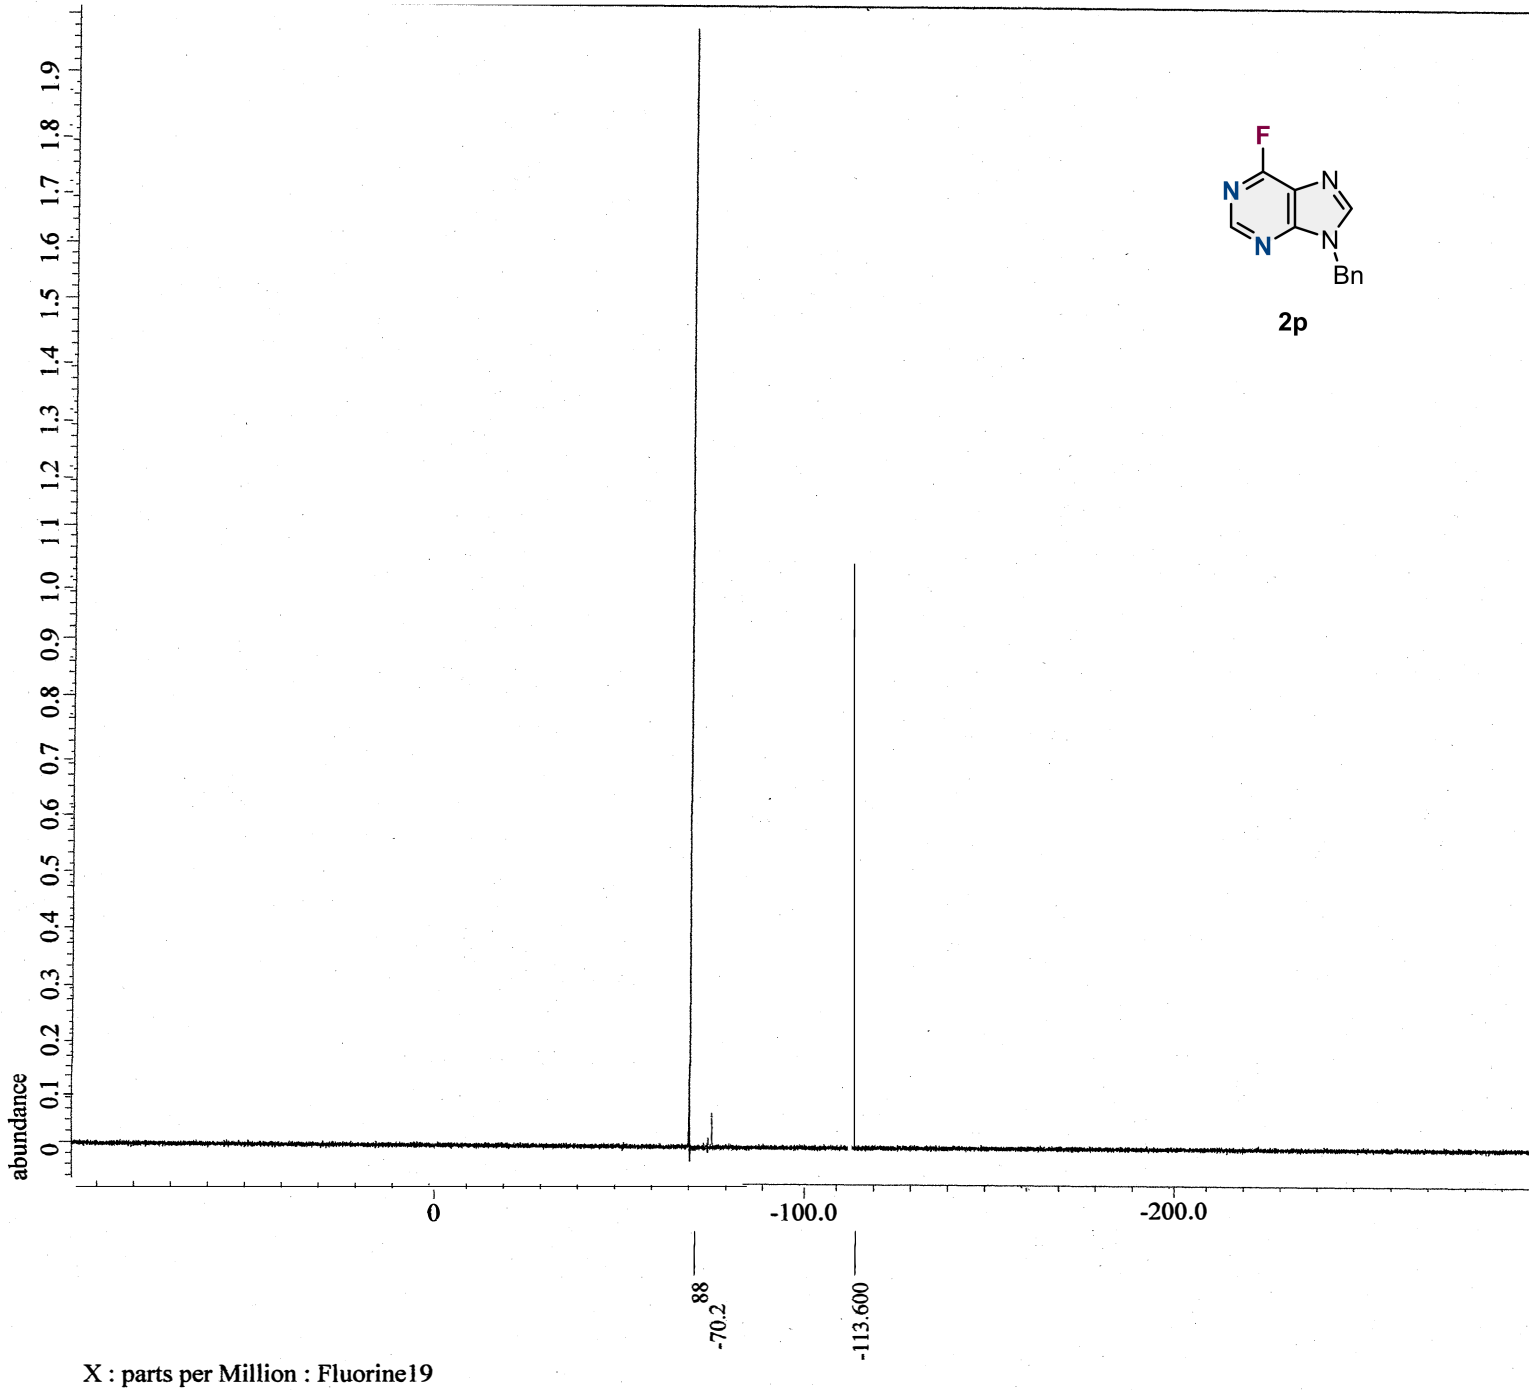

```

---- PROCESSING PARAMETERS ----
sexp( 0.2[Hz], 0.0[s] )
trapezoid( 0[%], 0[%], 80[%], 100[%] )
zerofill( 1, TRUE )
blip( 16, 64, 30 )
fft( 1, TRUE, TRUE )
machinephase
ppm

Derived from: MKN272-pure-int single pulse-1-1

```

```

Filename      = MKN272-pure-int_single
Author       = element
Experiment    = single_pulse.jpg
Sample Id    = MKN272-pure-int
Solvent      = CHLOROFORM-D
Actual Start Time = 20-JAN-2024 15:58:51
Revision Time = 17-JUN-2024 10:45:48

Comment      = single pulse
Data Format   = 1D COMP EXL
Dim Size     = 13107
X Domain     = Fluorine19
Dim Title    = Fluorine19
Dim Units    = [ppm]
Dimensions   = X
Spectrometer = DELTA2 NMR

Field Strength = 9.2982153[T] (400[MHz])
X Acq Duration = 89.12896[ms]
X Domain      = Fluorine19
X Freq       = 372.50336686[MHz]
X Offset     = -100[ppm]
X Points     = 16384
X Prescans   = 1
X Resolution = 11.21969784[Hz]
X Sweep      = 183.82352941[kHz]
X Sweep Clipped = 147.05882353[kHz]
Irr Domain   = Fluorine19
Irr Freq     = 372.50336686[MHz]
Irr Offset   = 5[ppm]
Tri Domain   = Fluorine19
Tri Freq     = 372.50336686[MHz]
Tri Offset   = 5[ppm]
Blanking     = 2.0[us]
Clipped      = FALSE
Scans        = 8
Total Scans  = 8

Relaxation Delay = 5[s]
Recvr Gain      = 56
Temp Get       = 18.3[dc]
X 90 Width     = 8.03[us]
X Acq Time     = 89.12896[ms]
X Angle        = 45[deg]
X Atn          = 5[dB]
X Pulse        = 4.015[us]
Irr Mode       = Off
Tri Mode       = Off
Date Loop     = 500
Date Present   = FALSE
Decimation Rate = 0
Initial Wait   = 1[s]
Phase         = {0, 90, 270, 180, 180,

```

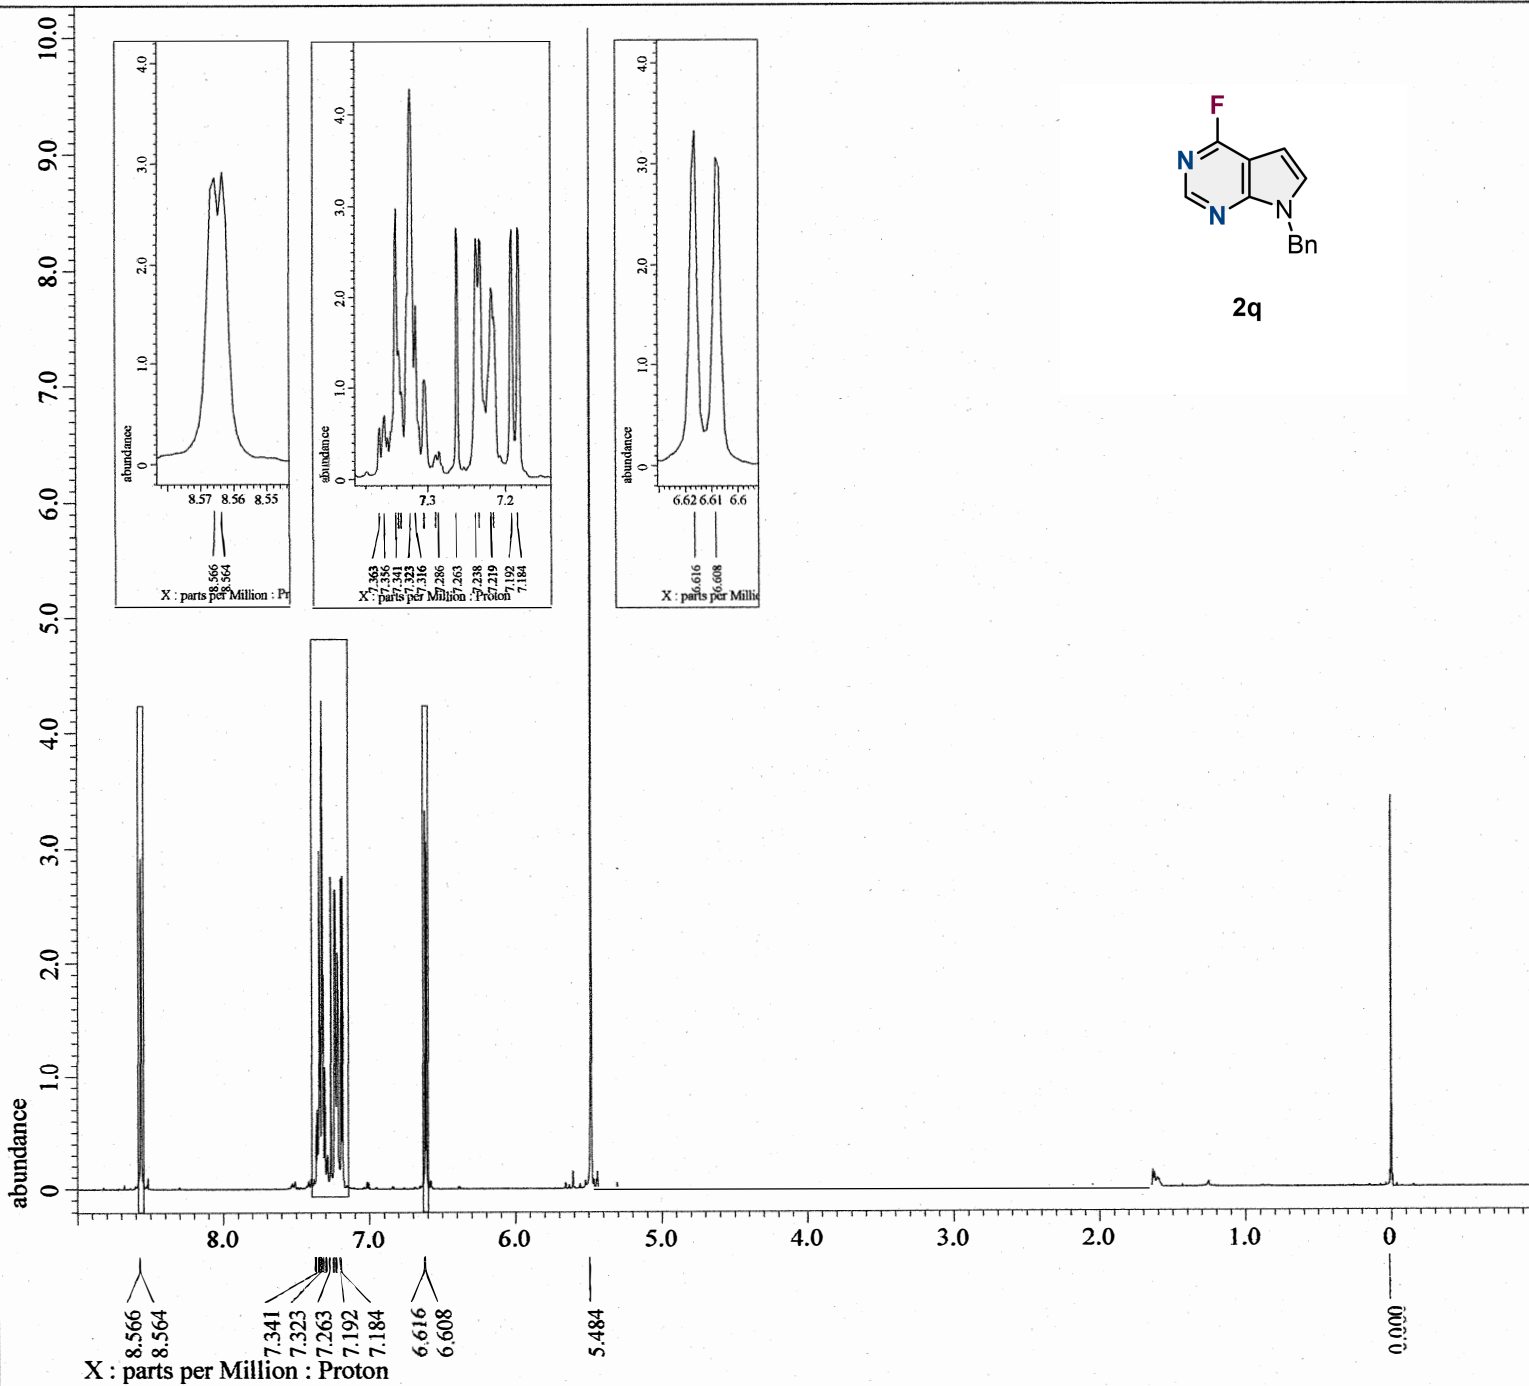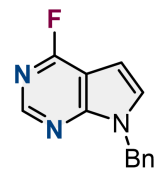

2q

```

---- PROCESSING PARAMETERS ----
dc_balance( 0, FALSE )
sexp( 0.2[Hz], 0.0[s] )
trapezoid( 0[%], 0[%], 80[%], 100[%] )
zerofill( 1, TRUE )
fft( 1, TRUE, TRUE )
machinephase
ppm
  
```

Derived from: MKN274-pure Proton-1-1.jdf

```

Filename      = MKN274-pure_Proton-1-2.jdf
Author       = element
Experiment   = proton.jxp
Sample Id    = MKN274-pure
Solvent      = CHLOROFORM-D
Actual_Start_Time = 20-JAN-2024 14:22:21
Revision_Time  = 17-JUN-2024 10:17:13
  
```

```

Comment      = single pulse
Data Format   = 1D COMPLEX
Dim Size     = 13107
X_Domain     = Proton
Dim Title    = Proton
Dim Units    = [ppm]
Dimensions   = X
Spectrometer = DELTA2_NMR
  
```

```

Field Strength = 9.4073814[T] (400[MHz])
X_Acq_Duration = 2.18103808[s]
X_Domain       = 1H
X_Freq         = 400.53219825[MHz]
X_Offset       = 5[ppm]
X_Points       = 16384
X_Prescans     = 1
X_Resolution   = 0.45849727[Hz]
X_Sweep        = 7.51201923[kHz]
X_Sweep_Clippped = 6.00961538[kHz]
Irr_Domain     = Proton
Irr_Freq       = 400.53219825[MHz]
Irr_Offset     = 5[ppm]
Tri_Domain     = Proton
Tri_Freq       = 400.53219825[MHz]
Tri_Offset     = 5[ppm]
Clipped        = FALSE
Scans          = 8
Total_Scans    = 9
  
```

```

Relaxation Delay = 5[s]
Recvr Gain       = 42
Temp_Get         = 19.3[dC]
X_90_Width      = 6.7[us]
X_Acq_Time       = 2.18103808[s]
X_Angle         = 45[deg]
X_Atn            = 0.8[dB]
X_Pulse         = 3.35[us]
Irr_Mode        = Off
Tri_Mode        = Off
Dante_Presat    = FALSE
Initial Wait     = 1[s]
Repetition Time  = 7.18103808[s]
  
```

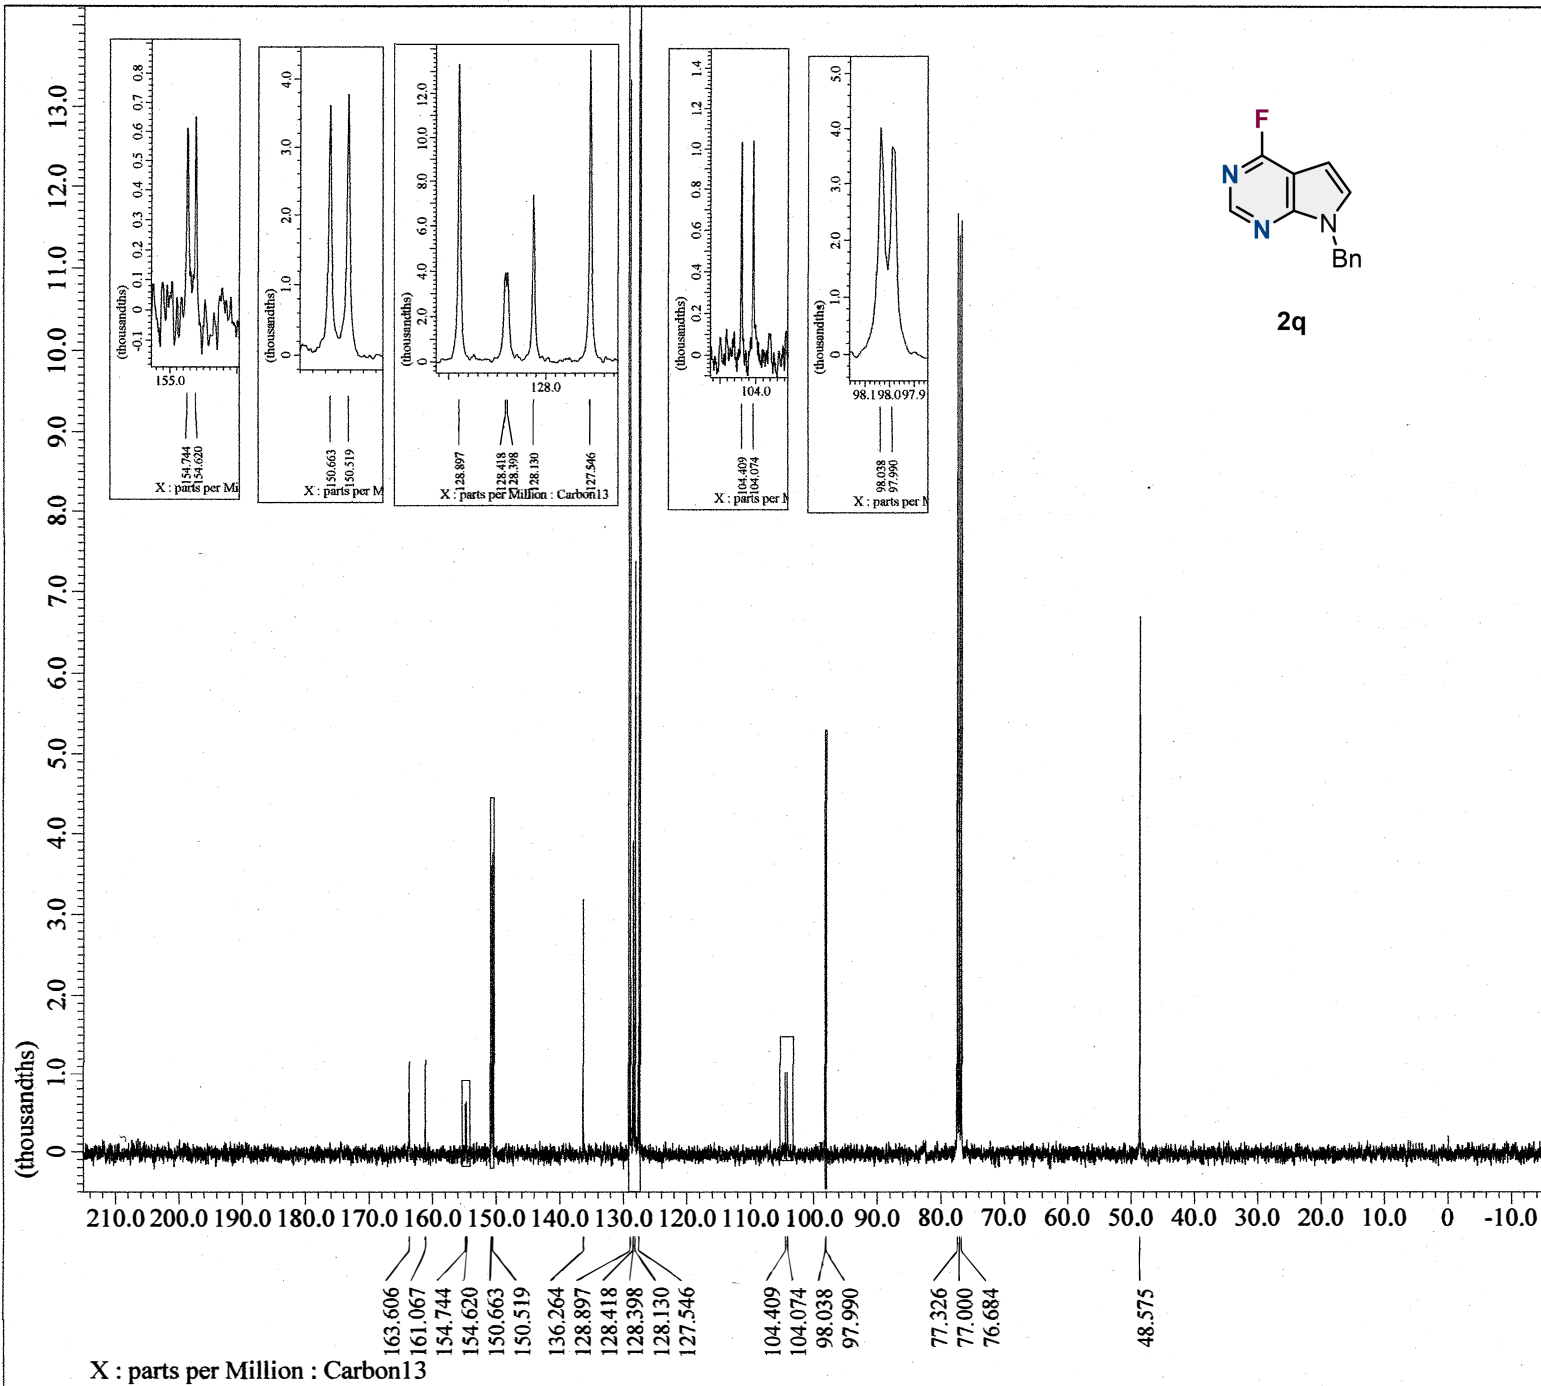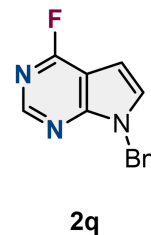

```

---- PROCESSING PARAMETERS ----
sexp( 2.0[Hz], 0.0[s] )
trapezoid( 0[%], 0[%], 80[%], 100[%] )
zerofill( 1, TRUE )
fft( 1, TRUE, TRUE )
machinephase
ppm

```

Derived from: MKN274-pure Carbon-1-1.jdf

```

Filename           = MKN274-pure_Carbon-
Author             = element
Experiment         = carbon_auto.jxp
Sample_Id         = MKN274-pure
Solvent           = CHLOROFORM-D
Actual_Start_Time = 20-JAN-2024 15:16:4
Revision_Time     = 17-JUN-2024 10:28:0

```

```

Comment           = single pulse decoupl
Data_Format       = 1D COMPLEX
Dim_Size          = 26214
X_Domain          = Carbon13
Dim_Title         = Carbon13
Dim_Units         = [ppm]
Dimensions        = X
Spectrometer      = DELTA2_NMR

```

```

Field_Strength    = 9.2982153[T] (400[M
X_Acq_Duration    = 1.048576[s]
X_Domain          = Carbon13
X_Freq            = 99.54517646[MHz]
X_Offset          = 100[ppm]
X_Points          = 32768
X_Prescans        = 4
X_Resolution      = 0.95367432[Hz]
X_Sweep           = 31.25[kHz]
X_Sweep_Clipped  = 25[kHz]
Irr_Domain        = Proton
Irr_Freq          = 395.88430144[MHz]
Irr_Offset        = 5[ppm]
Blanking          = 5.0[us]
Clipped           = FALSE
Scans             = 256
Total_Scans       = 256

```

```

Relaxation_Delay  = 2[s]
Recvr_Gain        = 50
Temp_Get          = 18.5[dC]
X_90_Width        = 11.5[us]
X_Acq_Time        = 1.048576[s]
X_Angle           = 30[deg]
X_Atn             = 9[dB]
X_Pulse           = 3.83333333[us]
Irr_Atn_Dec       = 30.172[dB]
Irr_Atn_Dec_Calc = 30.172[dB]
Irr_Atn_Dec_Default_Calc = 30.172[dB]
Irr_Atn_Noise    = 30.172[dB]
Irr_Dec_Bandwidth_Hz = 4.7826087[kHz]
Irr_Dec_Bandwidth_Ppm = 12.08082432[ppm]
Irr_Dec_Freq     = 395.88430144[MHz]
Irr_Dec_Merit_Factor = 2.2
Irr_Decoupling   = TRUE
Irr_Noise        = TRUE

```

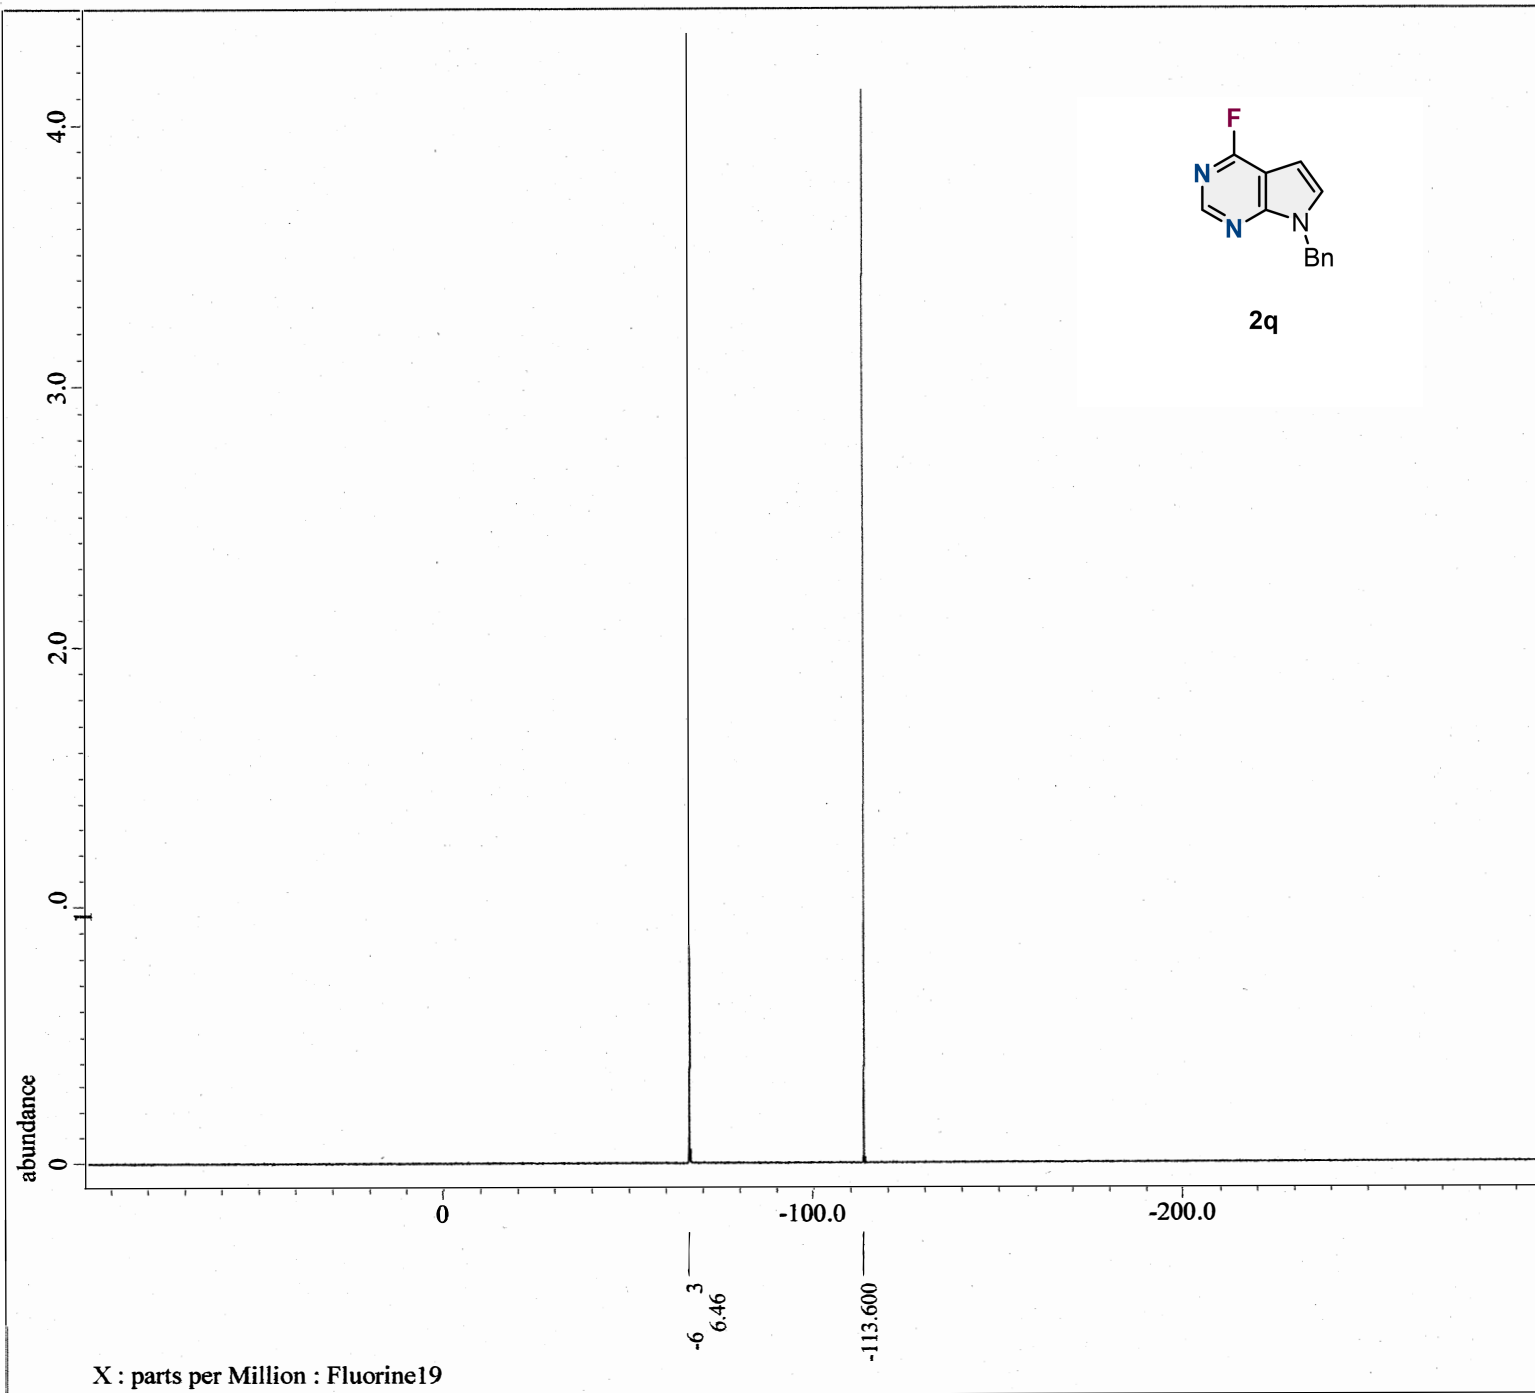

```

---- PROCESSING PARAMETERS ----
sexp( 0.2[Hz], 0.0[s] )
trapezoid( 0[%], 0[%], 80[%], 100[%] )
zerofill( 1 )
blip( 16, 64, 30 )
fft( 1, TRUE, TRUE )
machinephase
ppm

```

```

Filename      = MKN274_pure -mt_single
Author       = element
Experiment    = single_pulse.jpg
Sample Id     = MKN274-pure-int
Solvent       = CHLOROFORM-D
Actual Start Time = 20 -JAN-2024 15:12:22
Revision Time = 17 -JUN -2024 10:23:33

```

```

Comment       = single_pulse
Data Format    = 1D COMP EX
Dim Size      = 13107
X Domain      = Fluorine19
Dim Title     = Fluorine 19
Dim Units     = [ppm]
Dimensions    = X
Spectrum      = DELTA2_N MR

```

```

Field Strength = 9.2982153[T] (400[MHz])
X Acquisition  = 89.12896[ms]
X Domain       = Fluorine19
X Freq         = 372.50336686[MHz]
X Offset       = -100[ppm]
X Points       = 16384
X Pre scans    = 1
X Resolution   = 11.21969784[Hz]
X Sweep        = 183.82352941[kHz]
X Sweep Clipped = 147.05882353[kHz]
Irr Domain     = Fluorine19
Irr Freq       = 372.50336686[MHz]
Irr Offset     = 5[ppm]
Tri Domain     = Fluorine19
Tri Freq       = 372.50336686[MHz]
Tri Offset     = 5[ppm]
Blanking       = 2.0[us]
Clipped        = FALSE
Scans          = 8
Total Scans    = 8

```

```

Relaxation Delay = 5[s]
Recvr Gain       = 56
Temp Get         = 18.8[dc]
X 90 Width      = 8.03[us]
X Acq Time       = 89.12896[ms]
X Angle          = 45[deg]
X Atn            = 5[dB]
X Pulse         = 4.015[us]
Irr Mode        = Off
Tri Mode        = Off
Dante Loop      = 500
Dante Preheat   = FALSE
Decimation Rate = 0
Initial Wait     = 1[s]
Phase           = {0, 90, 270, 180, 180,

```

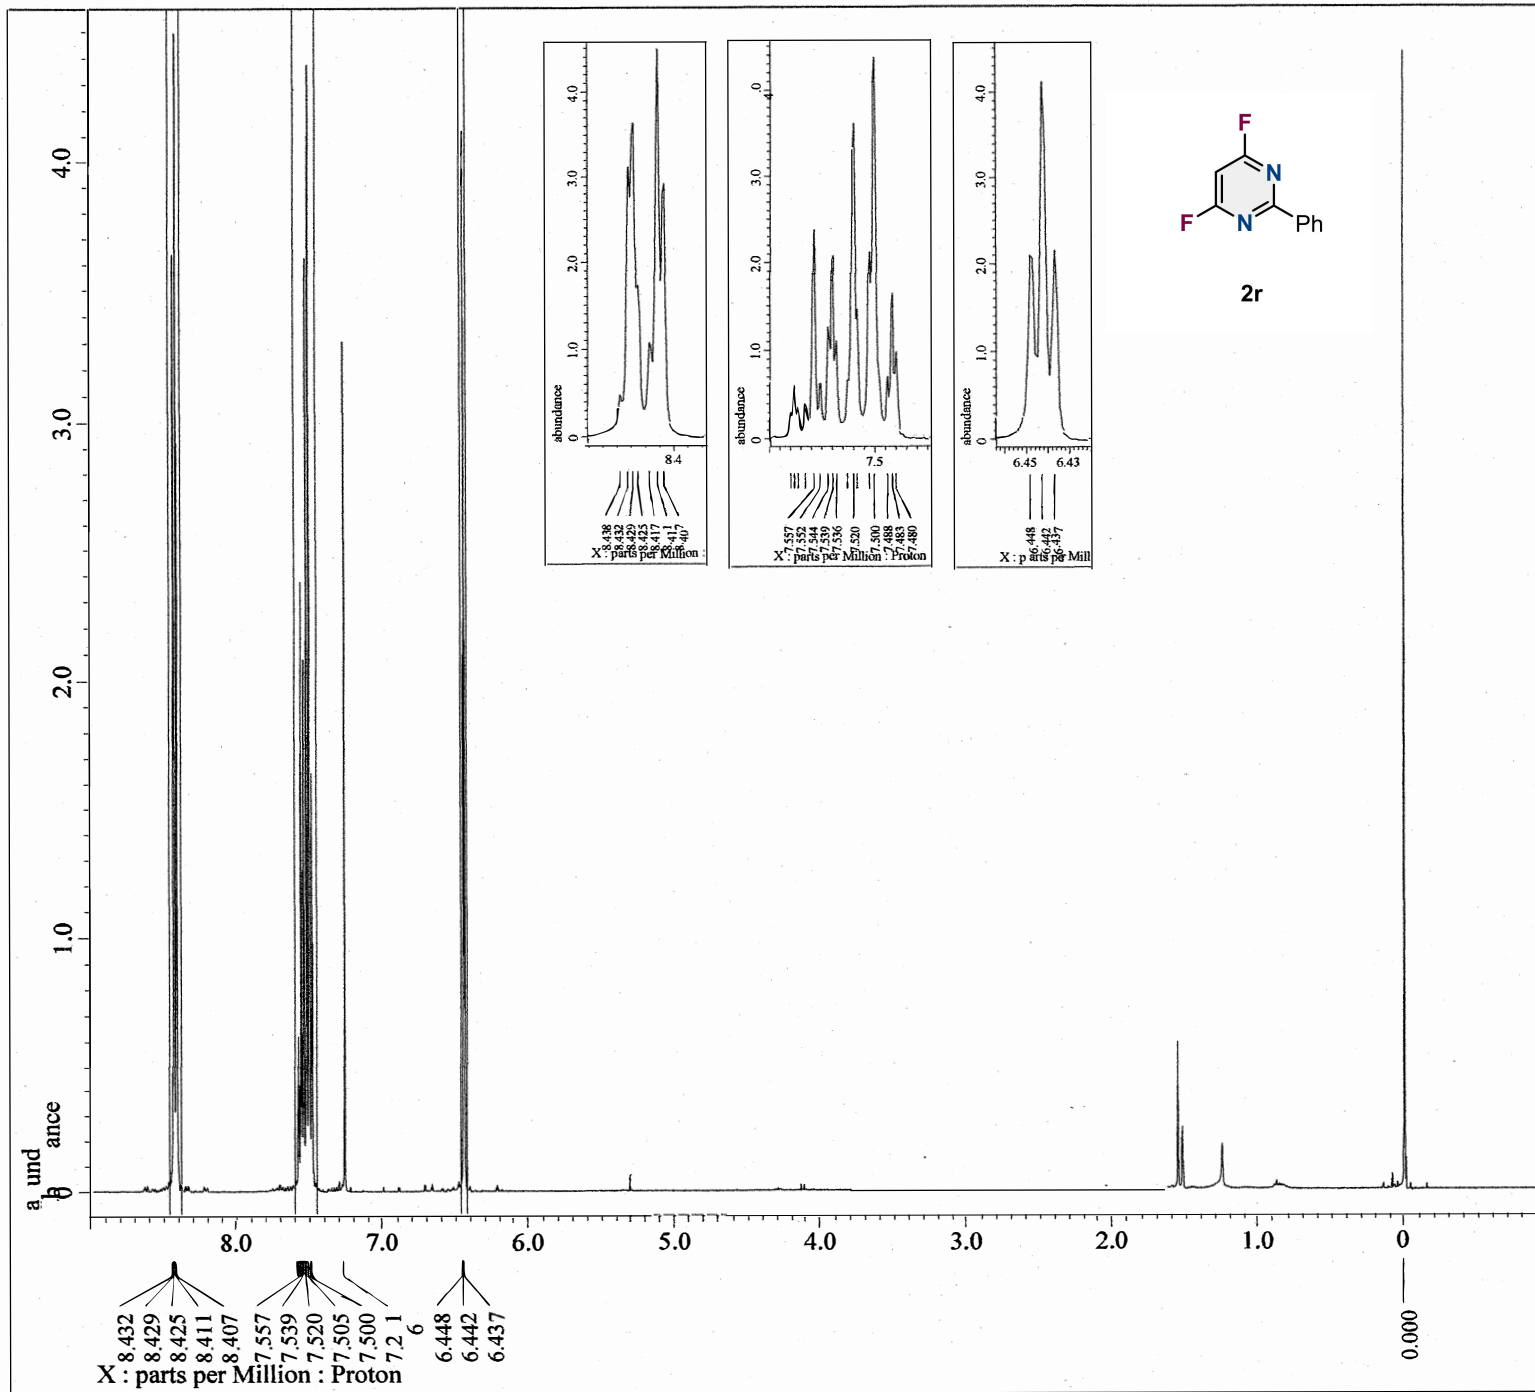

---PROCESSING PARAMETERS---

```

dc balance( 0, FALSE )
sexp( 0.2[Hz], 0.0[s] )
trapezoid( 0[%], 0[%], 80[%], 100[%] )
zerofill( 1, TRUE )
fft( 1, TRUE, TRUE )
machinphase
ppm

```

Derived from: MKN270-pure Proton-1-1.jdf

Filename = MKN270-pure\_Proton-1-2.jdf  
 Author = element  
 Experiment = proton.jxp  
 Sample\_Id = MKN270 -dmre  
 Solvent = CHLOROFORM-D  
 Actual\_Start\_Time = 22 -JUN-2024 11:13:58  
 Revision\_Time = 17-JUN-2024 09:47:51

Comment = single pulse  
 Data Format = 1D COMPLEX  
 Dim\_Size = 13107  
 X\_Domain = Proton  
 Dim\_Title = Proton  
 Dim\_Units = [ppm]  
 Dimensions = X  
 Spectrometer = DELTA2\_N MR

Field Strength = 9.4073814[T] (400[MHz])  
 X\_Acq\_Duration = 2.18103808[s]  
 X\_Domain = 1H  
 X\_Freq = 400.53219825[MHz]  
 X\_Offset = 5[ppm]  
 X\_Points = 16384  
 X\_Prescans = 1  
 X\_Resolution = 0.45849727[Hz]  
 X\_Sweep = 7.51201923[kHz]  
 X\_Sweep\_Clippped = 6.00961538[kHz]  
 Irr\_Domain = Proton  
 Irr\_Freq = 400.53219825[MHz]  
 Irr\_Offset = 5[ppm]  
 Tri\_Domain = Proton  
 Tri\_Freq = 400.53219825[MHz]  
 Tri\_Offset = 5[ppm]  
 Clipped = FALSE  
 Scans = 8  
 Total\_Scans = 8

Relaxation\_Delay = 5[s]  
 Recvr\_Gain = 44  
 Temp\_Get = 19.6[dC]  
 X\_90\_Width = 6.7[us]  
 X\_Acq\_Time = 2.18103808[s]  
 X\_Angle = 45[deg]  
 X\_Atn = 0.8[dB]  
 X\_Pulse = 3.35[us]  
 Irr\_Mode = Off  
 Tri\_Mode = Off  
 Dante\_Presat = FALSE  
 Initial\_Wait = 1[s]  
 Repetition\_Time = 7.18103808[s]

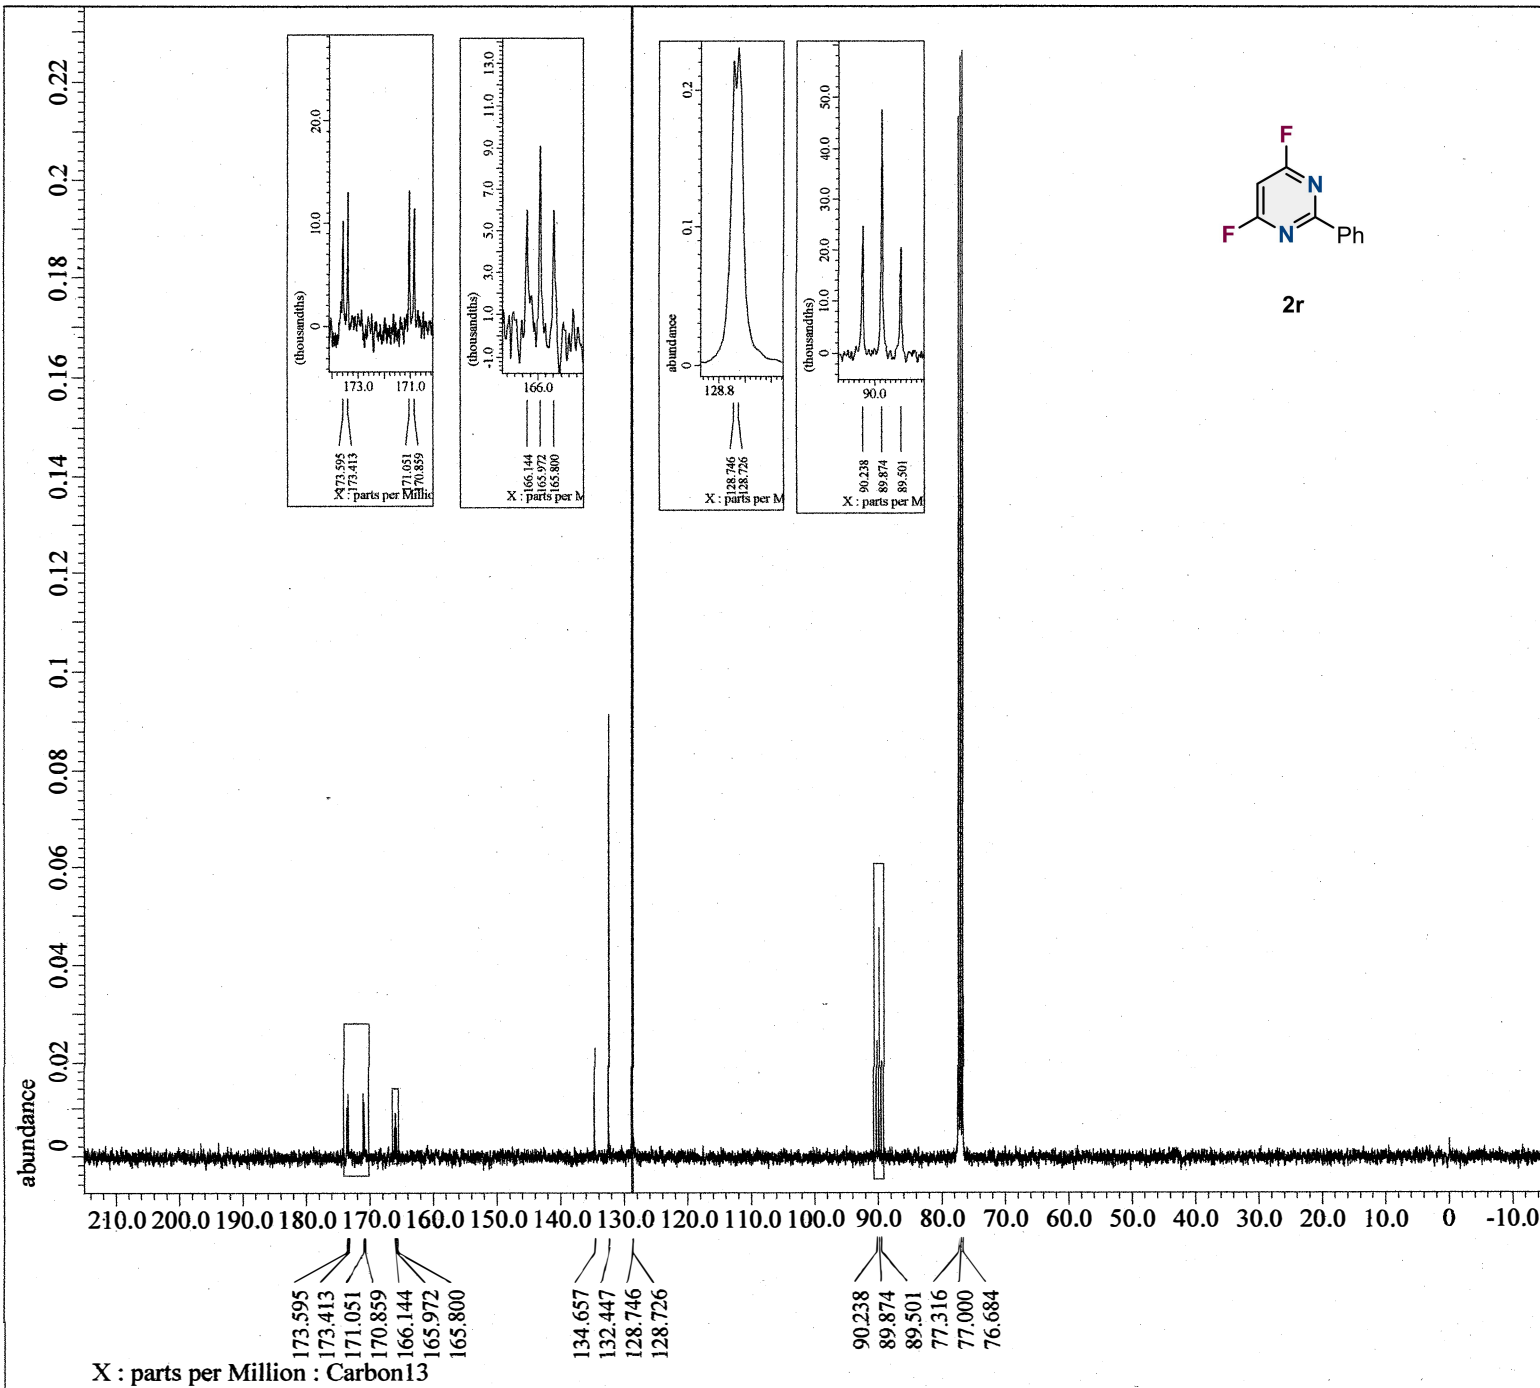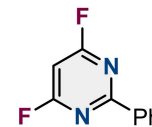

2r

```

---- PROCESSING PARAMETERS ----
dc_balance( 0, FALSE )
sexp( 2.0[Hz], 0.0[s] )
trapezoid( 0[%], 0[%], 80[%], 100[%] )
zerofill( 1, TRUE )
fft( 1, TRUE, TRUE )
machinephase
ppm

```

Derived from: MKN270-pure Carbon-1-1.jdf

```

Filename      = MKN270-pure_Carbon-1-2.jdf
Author       = element
Experiment   = carbon.jxp
Sample Id    = MKN270-di-pure
Solvent      = CHLOROFORM-D
Actual_Start Time = 22-JAN-2024 11:39:51
Revision_Time = 17-JUN-2024 09:54:20

```

```

Comment      = single pulse decoupled gat
Data Format   = 1D COMPLEX
Dim_Size     = 26214
X_Domain     = Carbon
Dim_Title    = Carbon13
Dim_Units    = [ppm]
Dimensions   = X
Spectrometer = DELTA2_NMR

```

```

Field Strength = 9.4073814[T] (400[MHz])
X_Acq_Duration = 1.03809024[s]
X_Domain      = 13C
X_Freq       = 100.71389092[MHz]
X_Offset     = 100[ppm]
X_Points     = 3 2 @
X_Prescans   = 4
X_Resolution = 0.96330739[Hz]
X_Sweep     = 31.56565657[kHz]
X_Sweep_Clip = 25.25252525[kHz]
Irr_Domain   = Proton
Irr_Freq    = 400.53219825[MHz]
Irr_Offset  = 5[ppm]
Clipped     = FALSE
Scans       = 512
Total_Scans = 512

```

```

Relaxation_Delay = 2[s]
Recvr_Gain       = 50
Temp_Get        = 19.6[dC]
X_90_Width     = 12.68[us]
X_Acq_Time     = 1.03809024[s]
X_Angle        = 30[deg]
X_Atn          = 4[dB]
X_Pulse        = 4.22666667[us]
Irr_Atn_Dec    = 26.45[dB]
Irr_Atn_Noise = 26.45[dB]
Irr_Noise     = WALTZ
Irr_Pwidth    = 0.115[ms]
Decoupling     = TRUE
Initial_Wait   = 1[s]
Noe            = TRUE
Noe_Time      = 2[s]
Repetition_Time = 3.03809024[s]

```

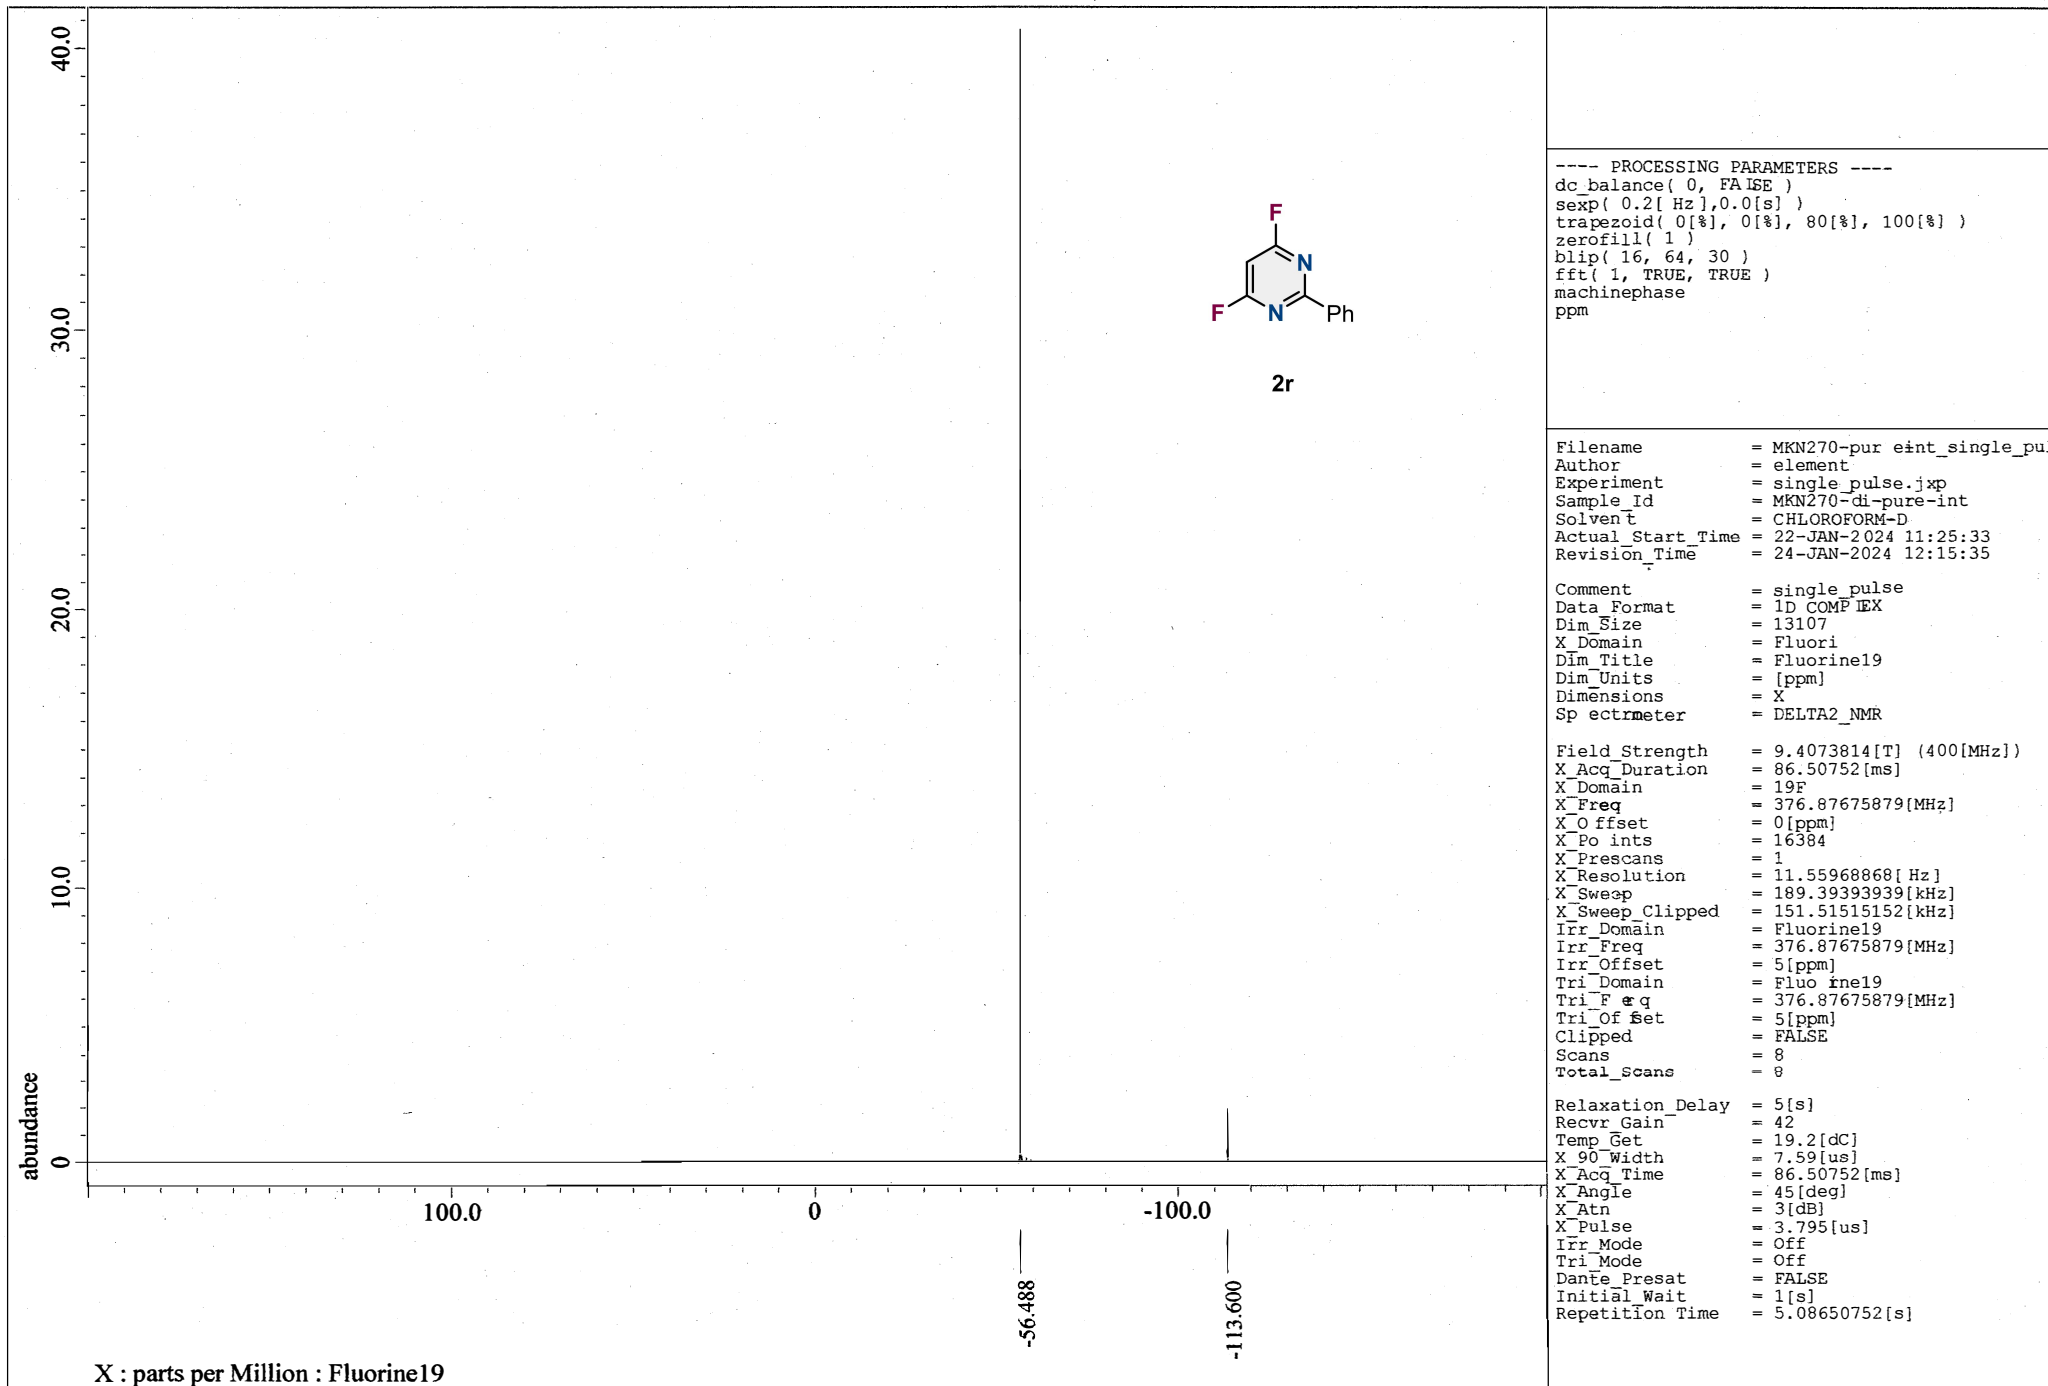

```

---- PROCESSING PARAMETERS ----
dc_balance( 0, FALSE )
seXP( 0.2[ Hz],0.0[s] )
trapezoid( 0[%], 0[%], 80[%], 100[%] )
zerofill( 1 )
blip( 16, 64, 30 )
fft( 1, TRUE, TRUE )
machinephase
ppm

```

```

Filename      = MKN270-pur eint_single_pul
Author        = element
Experiment    = single_pulse.jpg
Sample Id     = MKN270-di-pure-int
Solvent       = CHLOROFORM-D
Actual Start Time = 22-JAN-2024 11:25:33
Revision Time  = 24-JAN-2024 12:15:35

```

```

Comment       = single pulse
Data Format    = 1D COMPLEX
Dim Size      = 13107
X_Domain      = Fluorine19
Dim Title     = Fluorine19
Dim Units     = [ppm]
Dimensions    = X
Spectrometer  = DELTA2_NMR

```

```

Field Strength = 9.4073814[T] (400[MHz])
X_Acq_Duration = 86.50752[ms]
X_Domain       = 19F
X_Freq         = 376.87675879[MHz]
X_Offset       = 0[ppm]
X_Points       = 16384
X_Prescans     = 1
X_Resolution   = 11.55968868[ Hz]
X_Sweep        = 189.39393939[kHz]
X_Sweep_Clippped = 151.51515152[kHz]
Irr_Domain     = Fluorine19
Irr_Freq       = 376.87675879[MHz]
Irr_Offset     = 5[ppm]
Tri_Domain     = Fluorine19
Tri_Freq       = 376.87675879[MHz]
Tri_Offset     = 5[ppm]
Clipped        = FALSE
Scans          = 8
Total_Scans    = 8

```

```

Relaxation Delay = 5[s]
Recvr Gain       = 42
Temp_Get         = 19.2[dC]
X_90_Width      = 7.59[us]
X_Acq_Time       = 86.50752[ms]
X_Angle          = 45[deg]
X_Atn            = 3[dB]
X_Pulse          = 3.795[us]
Irr_Mode         = Off
Tri_Mode         = Off
Dante_Presat    = FALSE
Initial Wait     = 1[s]
Repetition Time  = 5.08650752[s]

```

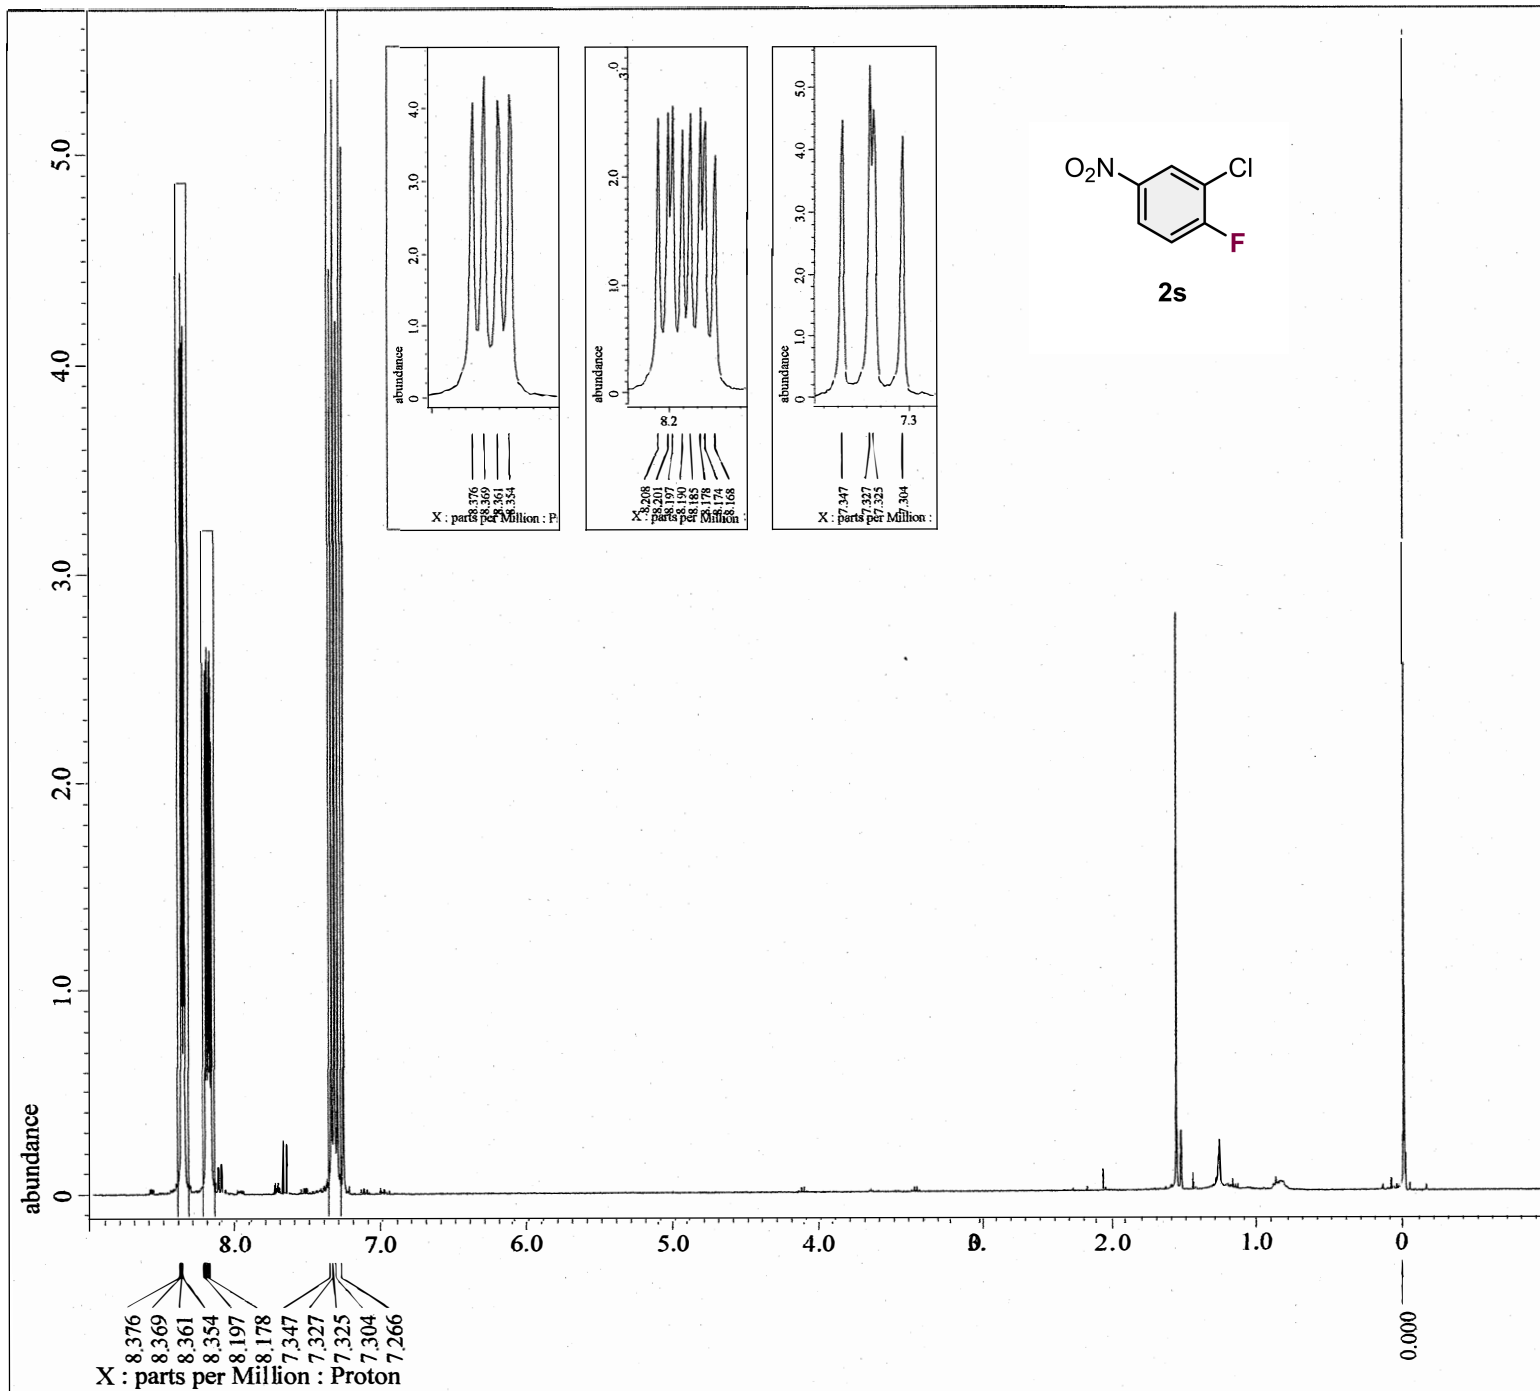

```

---- PROCESSING PARAMETERS ----
dc balance(0, FALSE)
sext(0.2[Hz], 0.0[s])
trapezoid(0[%], 0[%], 80[%], 100[%])
zerofill(1, TRUE)
fft(1, TRUE, TRUE)
macchinephase
ppm

```

Derived from: MKN283-pure Proton-1-1.jdf

```

Filename      = MKN283-pure_Proton-1-2.jdf
Author       = element
Experiment   = proton.jxp
Sample_Id    = MKN283-pure
Solvent      = CHLOROFORM-D
Actual_Start_Time = 25-JAN-2024 13:49:52
Revision_Time  = 17-JUN-2024 09:15:08

```

```

Comment      = single pulse
Data Format   = 1D COMP EX
Dim_Size     = 13107
X_Domain     = Proton
Dim_Title    = Proton
Dim_Units    = [ppm]
Dimensions   = X
Spectrometer = DELTA2_NMR

```

```

Field Strength = 9.4073814[T] (400[MHz])
X_Acquisition = 2.18103808[s]
X_Domain      = 1H
X_Freq       = 400.53219825[MHz]
X_Offset     = 5[ppm]
X_Points     = 16384
X_Prescans   = 1
X_Resolution = 0.45849727[Hz]
X_Sweep      = 7.51201923[kHz]
X_Sweep_Clip = 6.00961538[kHz]
Irr_Domain   = Proton
Irr_Freq     = 400.53219825[MHz]
Irr_Offset   = 5[ppm]
Tri_Domain   = Proton
Tri_Freq     = 400.53219825[MHz]
Tri_Offset   = 5[ppm]
Clipped      = FALSE
Scans        = 8
Total_Scans  = 8

```

```

Relaxation_Delay = 5[s]
Recvr_Gain       = 48
Temp_Get         = 19[dC]
X_90_Width      = 6.7[us]
X_Acq_Time       = 2.18103808[s]
X_Angle         = 45[deg]
X_Atn           = 0.8[dB]
X_Pulse         = 3.35[us]
Irr_Mode        = Off
Tri_Mode        = Off
Dante_Reset     = FALSE
Initial_Wait    = 1[s]
Rep_Acquisition_Time = 7.18103808[s]

```



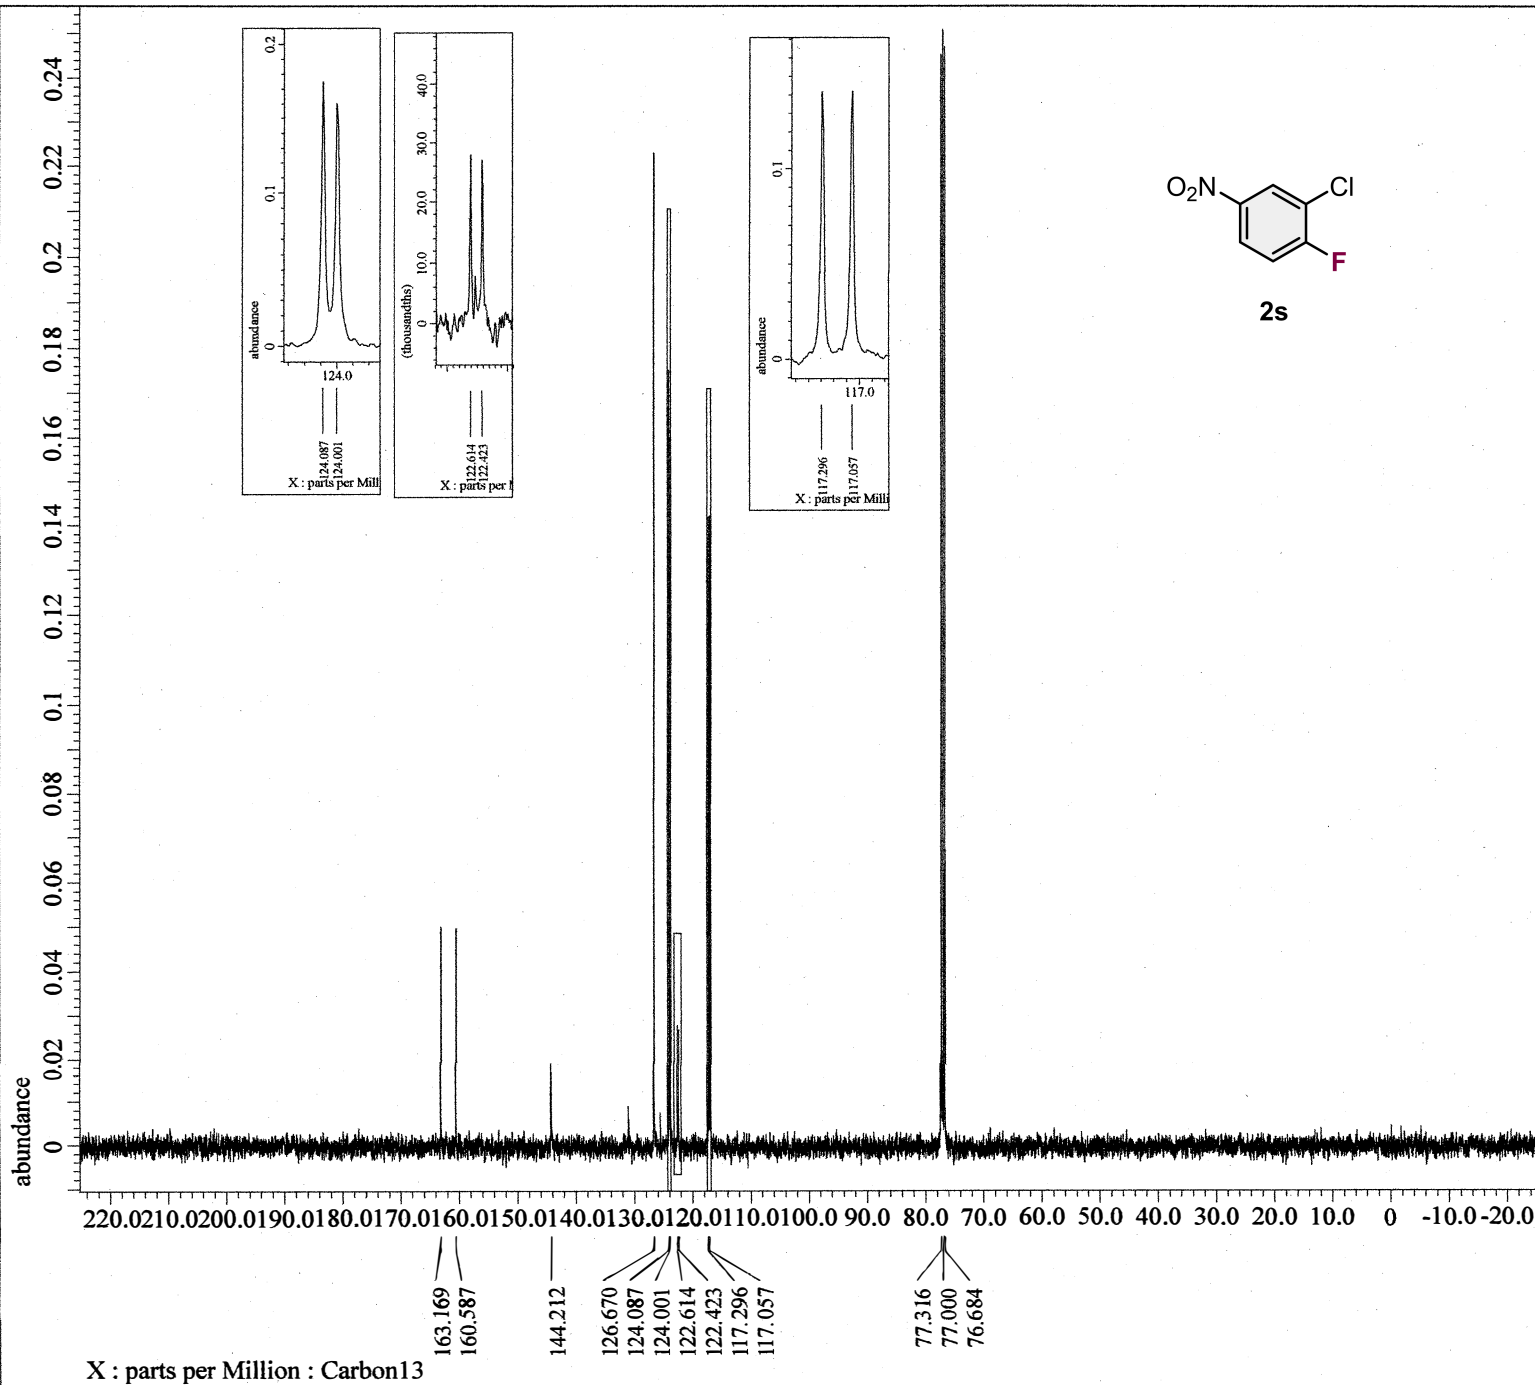

```

---- PROCESSING PARAMETERS ----
dc balance( 0, FALSE )
sexp( 2.0[Hz], 0.0[s] )
trapezoid( 0[%], 0[%], 80[%], 100[%] )
zerofill( 1, TRUE )
fft( 1, TRUE, TRUE )
machinephase
ppm

```

Derived from: MKN283-pure Carbon-1-1.jdf

```

Filename      = MKN283-pure_Carbon-1-2.jdf
Author       = element
Experiment   = carbon.jxp
Sample Id    = MKN283-pure
Solvent      = CHLOROFORM-D
Actual Start Time = 25-JAN-2024 14:19:32
Revision Time = 17-JUN-2024 09:34:36

```

```

Comment      = single pulse decoupled gat
Data Format   = 1D COMPLEX
Dim Size     = 26214
X_Domain     = Carbon
Dim Title    = Carbon13
Dim Units    = [ppm]
Dimensions   = X
Spectrometer = DELTA2_NMR

```

```

Field Strength = 9.4073814[T] (400[MHz])
X_Acq_Duration = 1.03809024[s]
X_Domain       = 13C
X_Freq         = 100.71389092[MHz]
X_Offset       = 100[ppm]
X Points       = 32768
X_Prescans     = 4
X_Resolution   = 0.96330739[Hz]
X_Sweep        = 31.56565657[kHz]
X_Sweep_Clipped = 25.25252525[kHz]
Irr_Domain     = Proton
Irr_Freq       = 400.53219825[MHz]
Irr_Offset     = 5[ppm]
Clipped        = FALSE
Scans          = 257
Total_Scans    = 257

```

```

Relaxation_Delay = 2[s]
Recvr_Gain       = 50
Temp_Get         = 19.5[dC]
X_90_Width       = 12.68[us]
X_Acq_Time       = 1.03809024[s]
X_Angle          = 30[deg]
X_Atn            = 4[dB]
X_Pulse          = 4.22666667[us]
Irr_Atn_Dec      = 26.45[dB]
Irr_Atn_Noise    = 26.45[dB]
Irr_Noise        = WALTZ
Irr_Pwidth       = 0.115[ms]
Decoupling       = TRUE
Initial_Wait     = 1[s]
Noe               = TRUE
Noe_Time         = 2[s]
Repetition Time  = 3.03809024[s]

```

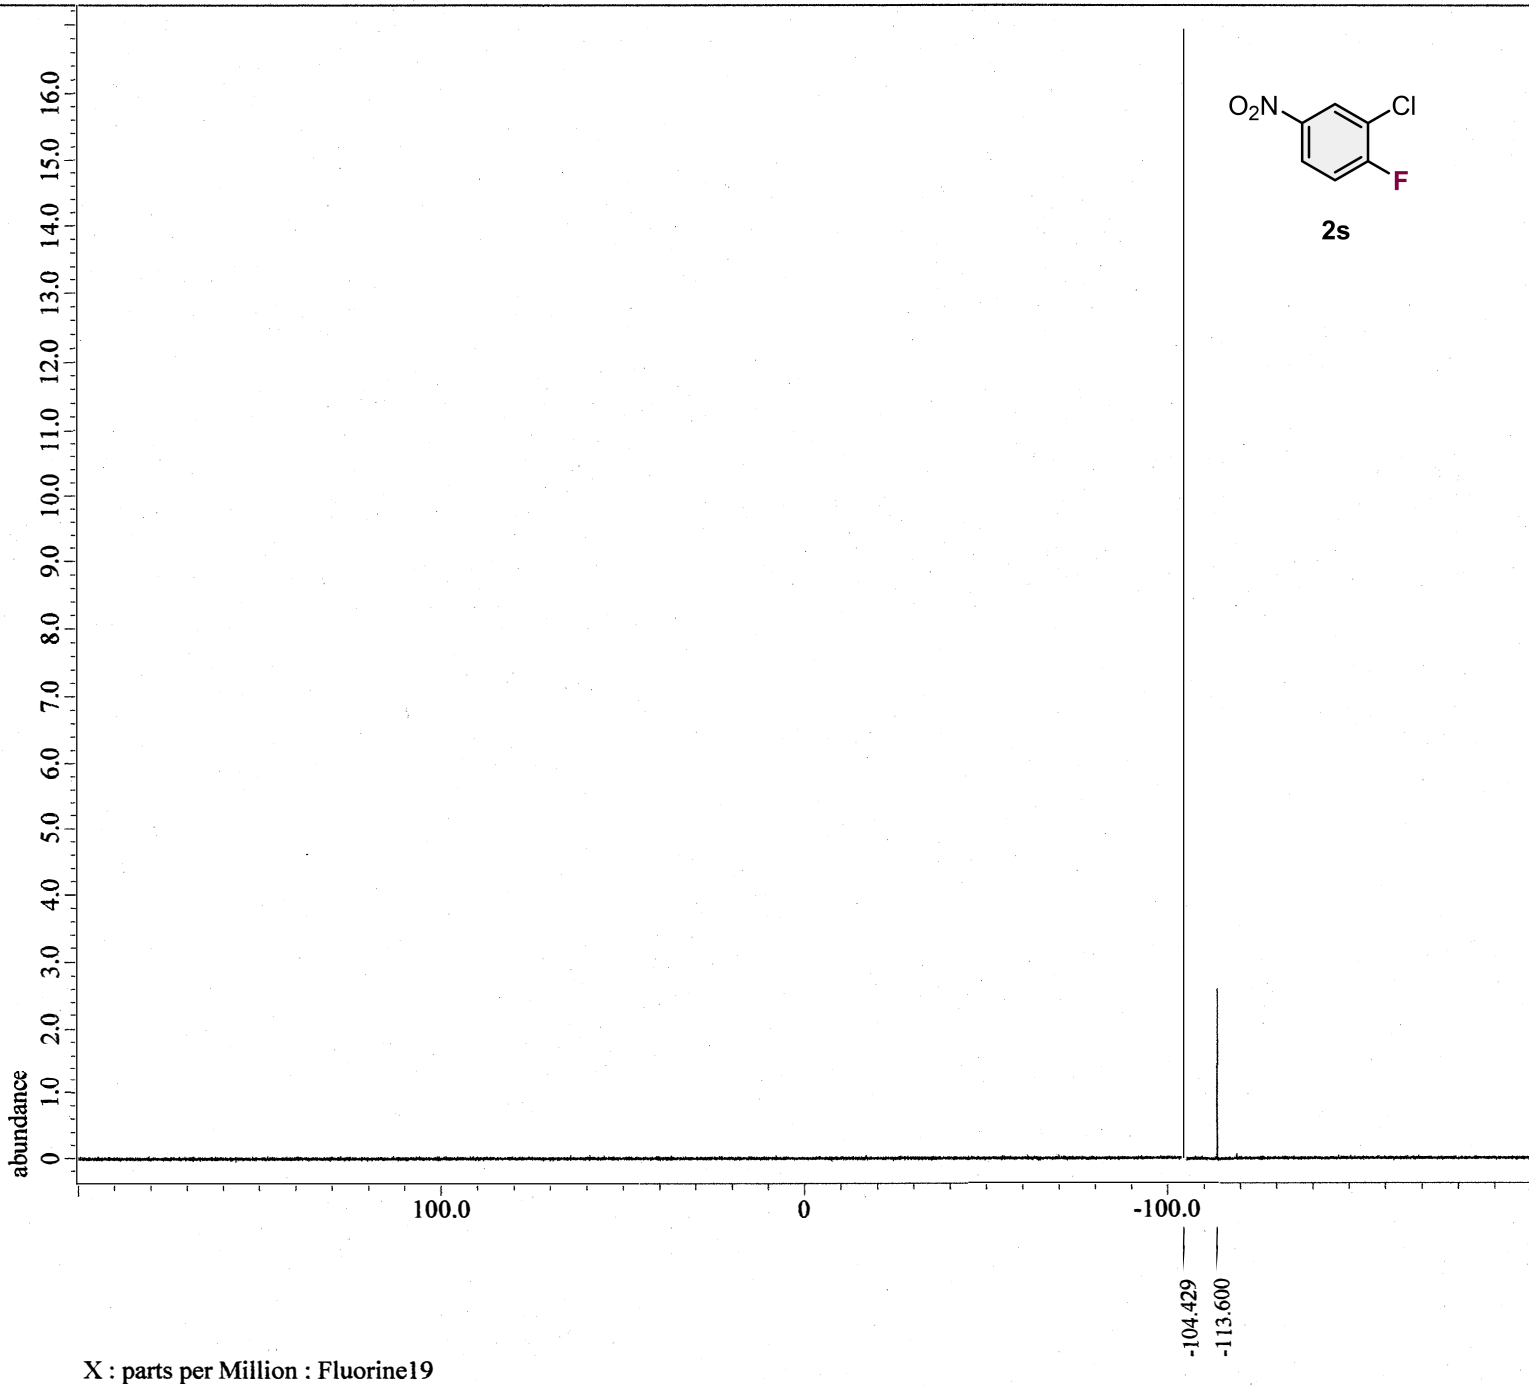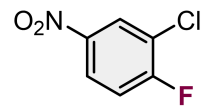

2s

```

---- PROCESSING PARAMETERS ----
dc balance( 0, FALSE )
s e( 0.2[Hz], 0.0[s ] )
t r( 0[ ], 0[ ], 80[ % ], 100[ % ] )
zerofill( 1 )
blip( 16, 64, 30 )
fft( 1, TRUE, TRUE )
machin phas e
ppm

```

```

Filename           = MKN283-pure-int_single_pul
Aut hor            = elem ent
E periment         = single_pulse.jxp
Sample Id         = MKN283-pure-int
Solvent           = C HL OROFORM-D
Actual Start Time = 25-JAN-2024 13:28:28
Revision Time     = 17-JUN-2024 09:39:52

```

```

Comment           = single_pulse
Data Format        = 1D COMPLEX
Dim Size          = 13107
X Domain          = Fluori
Dim Title         = Fluorine19
Dim Units         = [ppm]
Dimension        = X
Spectrum Name    = DELTA2_NM R

```

```

Field Strength    = 9.4073814[T] (400[M Hz])
X_Acquisition    = 86.50752[ms ]
X_Domain          = 19F
X_Freq           = 376.87675879[MHz]
X_Offset         = 0[ppm]
X_Points         = 16384
X_Prescans       = 1
X_Resolution     = 11.55968868[ Hz ]
X_Sweep          = 189.39393939[k Hz]
X_Sweep Clipped  = 151.51515152[k Hz]
Irr_Domain       = Fluorine19
Irr_Freq         = 376.87675879[M Hz ]
Irr_Offset       = 5[ppm]
Tri_Domain       = Fluorine19
Tri_Freq         = 376.87675879[M Hz]
Tri_Offset       = 5[ppm]
Clipped          = FALSE
Scans            = 8
Total Scans      = 8

```

```

Relaxation Delay  = 5[s ]
Recvr Gain       = 46
Temp Get         = 19[dC]
X_90_Width       = 7.59[us]
X_Acquisition    = 86.50752[ms ]
X_Angle          = 45[ deg]
X_Atn            = 3[dB]
X_Pulse          = 3.795[us]
Irr_Mode         = Off
Tri_Mode         = Off
Date Presat      = FALSE
Initial Wait     = 1[s]
Repetition Time  = 5.08650752[s]

```

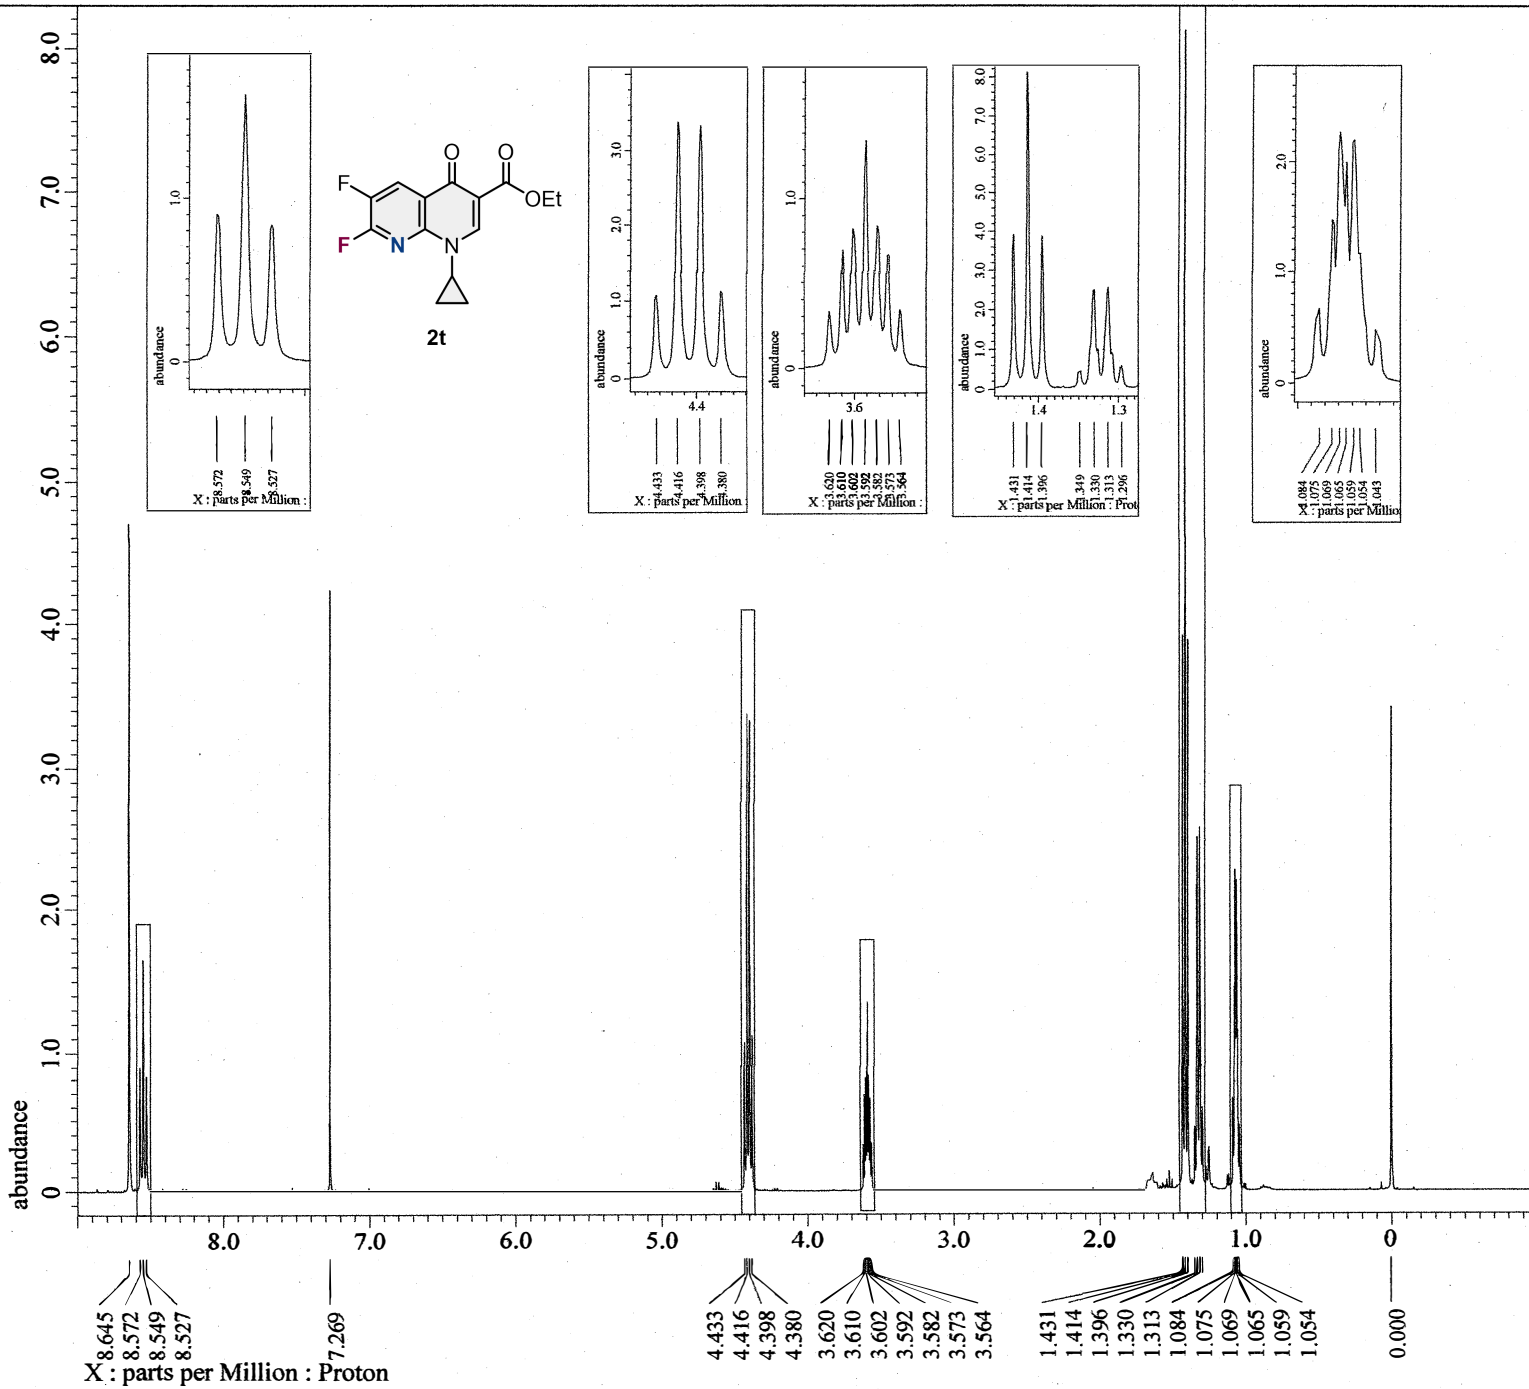

---- PROCESSING PARAMETERS ----  
 dc balance( 0, FALSE )  
 sexp( 0.2[Hz], 0.0[s] )  
 trapezoid( 0[%], 0[%], 80[%], 100[%] )  
 zerofill( 1, TRUE )  
 fft( 1, TRUE, TRUE )  
 machinephase  
 ppm  
 Derived from: MKN231-pure Proton-1-1.jdf

Filename = MKN231-pure\_Proton-1-2.jdf  
 Author = element  
 Experiment = proton.jxp  
 Sample Id = MKN231-pure  
 Solvent = CHLOROFORM-D  
 Actual\_Start\_Time = 22-JAN-2024 15:49:05  
 Revision\_Time = 15-JUN-2024 22:05:59

Comment = single pulse  
 Data Format = 1D COMPLEX  
 Dim\_Size = 13107  
 X\_Domain = Proton  
 Dim Title = Proton  
 Dim Units = [ppm]  
 Dimensions = X  
 Site = JNM-ECS400  
 Spectrometer = DELTA2\_NMR

Field\_Strength = 9.37221[T] (400[MHz])  
 X\_Acq\_Duration = 2.1889024[s]  
 X\_Domain = 1H  
 X\_Freq = 399.03472754[MHz]  
 X\_Offset = 5.0[ppm]  
 X\_Points = 16384  
 X\_Prescans = 1  
 X\_Resolution = 0.45684997[Hz]  
 X\_Sweep = 7.48502994[kHz]  
 X\_Sweep\_Clippped = 5.98802395[kHz]  
 Irr\_Domain = Proton  
 Irr\_Freq = 399.03472754[MHz]  
 Irr\_Offset = 5.0[ppm]  
 Tri\_Domain = Proton  
 Tri\_Freq = 399.03472754[MHz]  
 Tri\_Offset = 5.0[ppm]  
 Clipped = FALSE  
 Scans = 8  
 Total\_Scans = 8

Relaxation\_Delay = 5[s]  
 Recvr\_Gain = 42  
 Temp\_Get = 19.4[dC]  
 X\_90\_Width = 6.6[us]  
 X\_Acq\_Time = 2.1889024[s]  
 X\_Angle = 45[deg]  
 X\_Atn = 1[dB]  
 X\_Pulse = 3.3[us]  
 IFr\_Mode = Off  
 Tri\_Mode = Off  
 DanTe\_Presat = FALSE  
 Initial\_Wait = 1[s]  
 Repetition\_Time = 7.1889024[s]

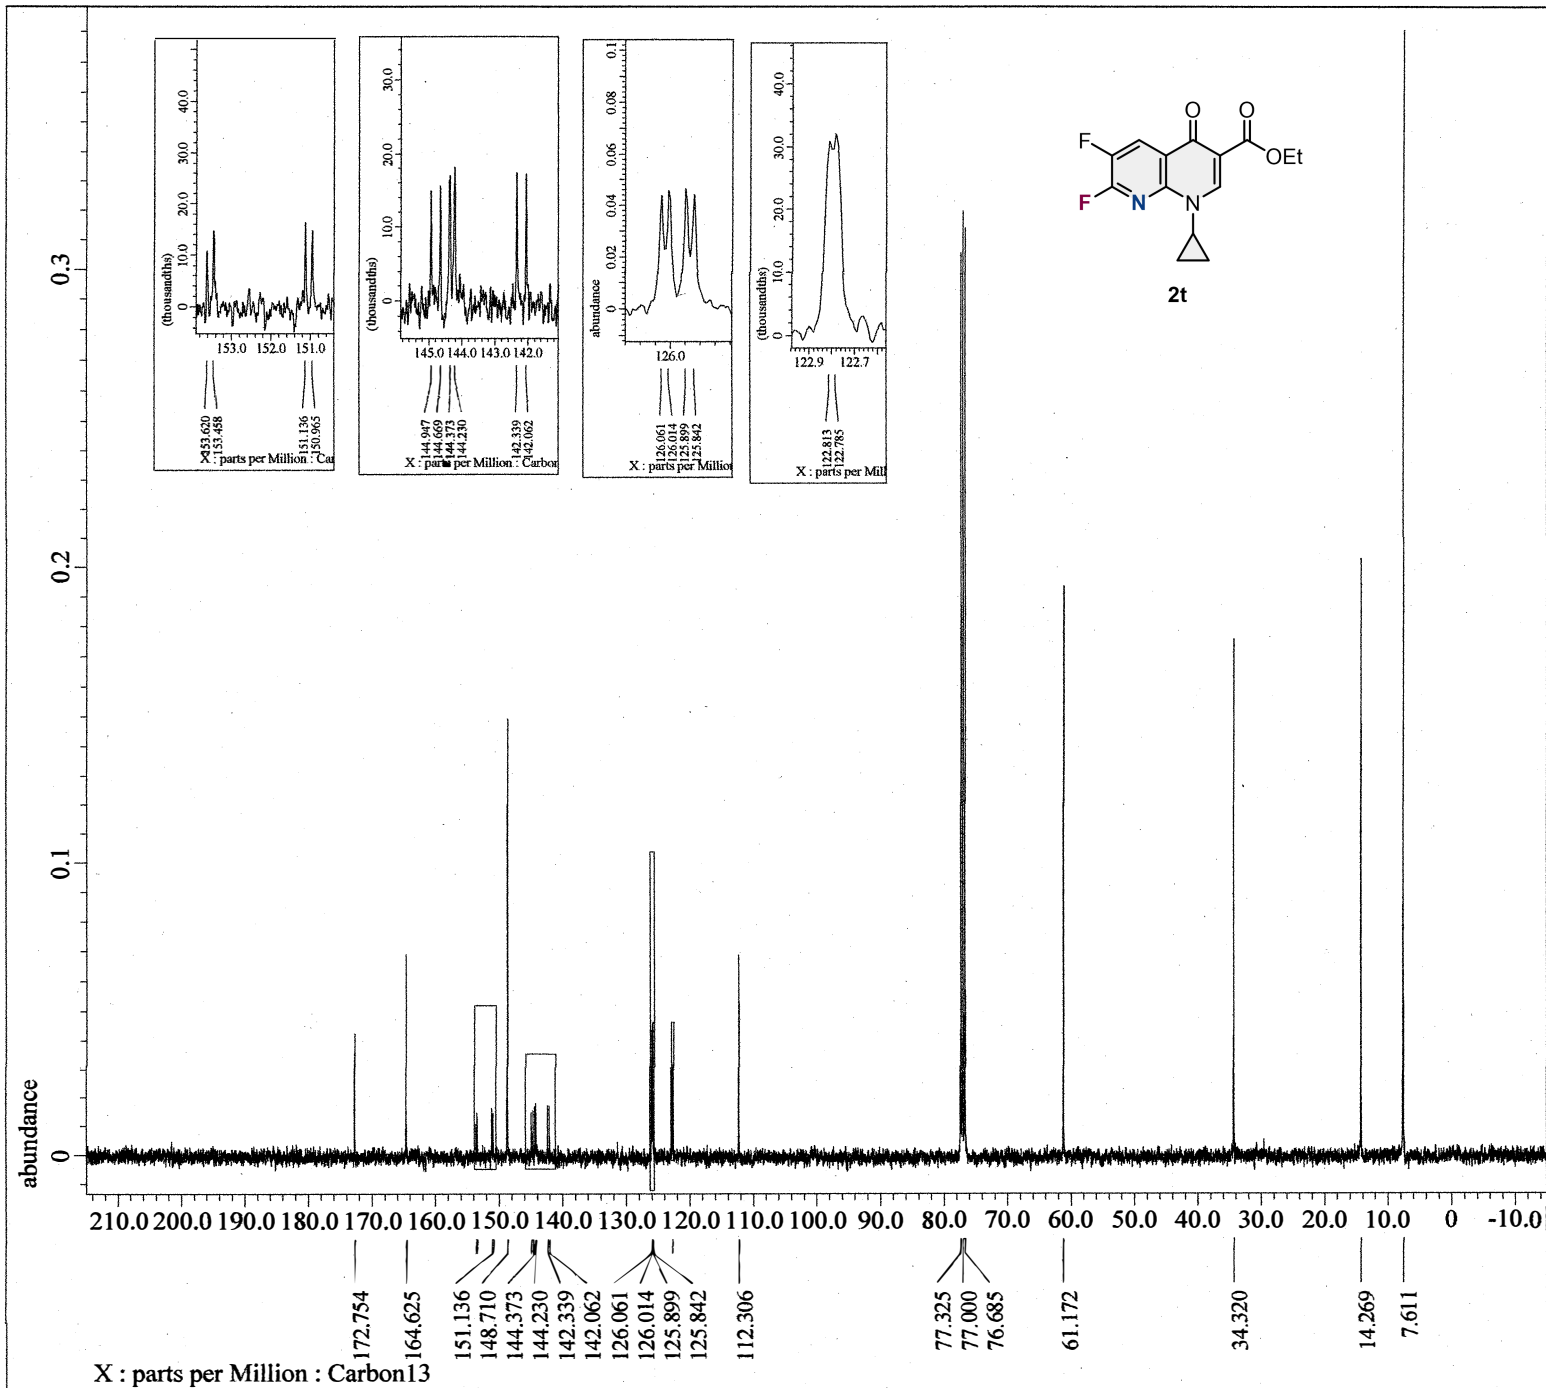

```

---- PROCESSING PARAMETERS ----
dc balance( 0, FALSE )
sexp( 2.0[Hz], 0.0[s] )
trapezoid( 0[%], 0[%], 80[%], 100[%] )
zerofill( 1, TRUE )
fft( 1, TRUE, TRUE )
machinephase
ppm

```

Derived from: MKN231-pure Carbon-1-1.jdf

```

Filename      = MKN231-pure_Carbon-1-2.jdf
Author       = element
Experiment   = carbon.jxp
Sample_Id    = MKN231-pure
Solvent      = CHLOROFORM-D
Actual_Start_Time = 22-JAN-2024 16:37:40
Revision_Time  = 15-JUN-2024 22:34:50

```

```

Comment      = single pulse decoupled gat
Data Format   = 1D COMPLEX
Dim_Size     = 26214
X_Domain     = Carbon
Dim_Title    = Carbon13
Dim_Units    = [ppm]
Dimensions   = X
Site         = JNM-ECS400
Spectrometer = DELTA2_NMR

```

```

Field_Strength = 9.37221[T] (400[MHz])
X_Acq_Duration = 1.04333312[s]
X_Domain       = 13c
X_Freq         = 100.33735165[MHz]
X_Offset       = 100.0[ppm]
X_Points       = 32768
X_Prescans     = 4
X_Resolution   = 0.95846665[Hz]
X_Sweep        = 31.40703518[kHz]
X_Sweep_Clippped = 25.12562814[kHz]
Irr_Domain     = Proton
Irr_Freq       = 399.03472754[MHz]
Irr_Offset     = 5.0[ppm]
Clipped        = FALSE
Scans          = 256
Total_Scans    = 256

```

```

Relaxation_Delay = 2[s]
Recvr Gain       = 50
Temp_Get         = 19.7[dC]
X_90_Width       = 10.9[us]
X_Acq_Time       = 1.04333312[s]
X_Angle          = 30[deg]
X_Atn            = 5.4[dB]
X_Pulse          = 3.63333333[us]
Irr_Atn_Dec     = 25.823[dB]
Irr_Atn_No     = 25.823[dB]
Irr_Noise       = WALTZ
Irr_Pwidth       = 0.115[ms]
Decoupling       = TRUE
Initial_Wait     = 1[s]
Noe              = TRUE
Noe_Time        = 2[s]
Repetition_Time  = 3.04333312[s]

```

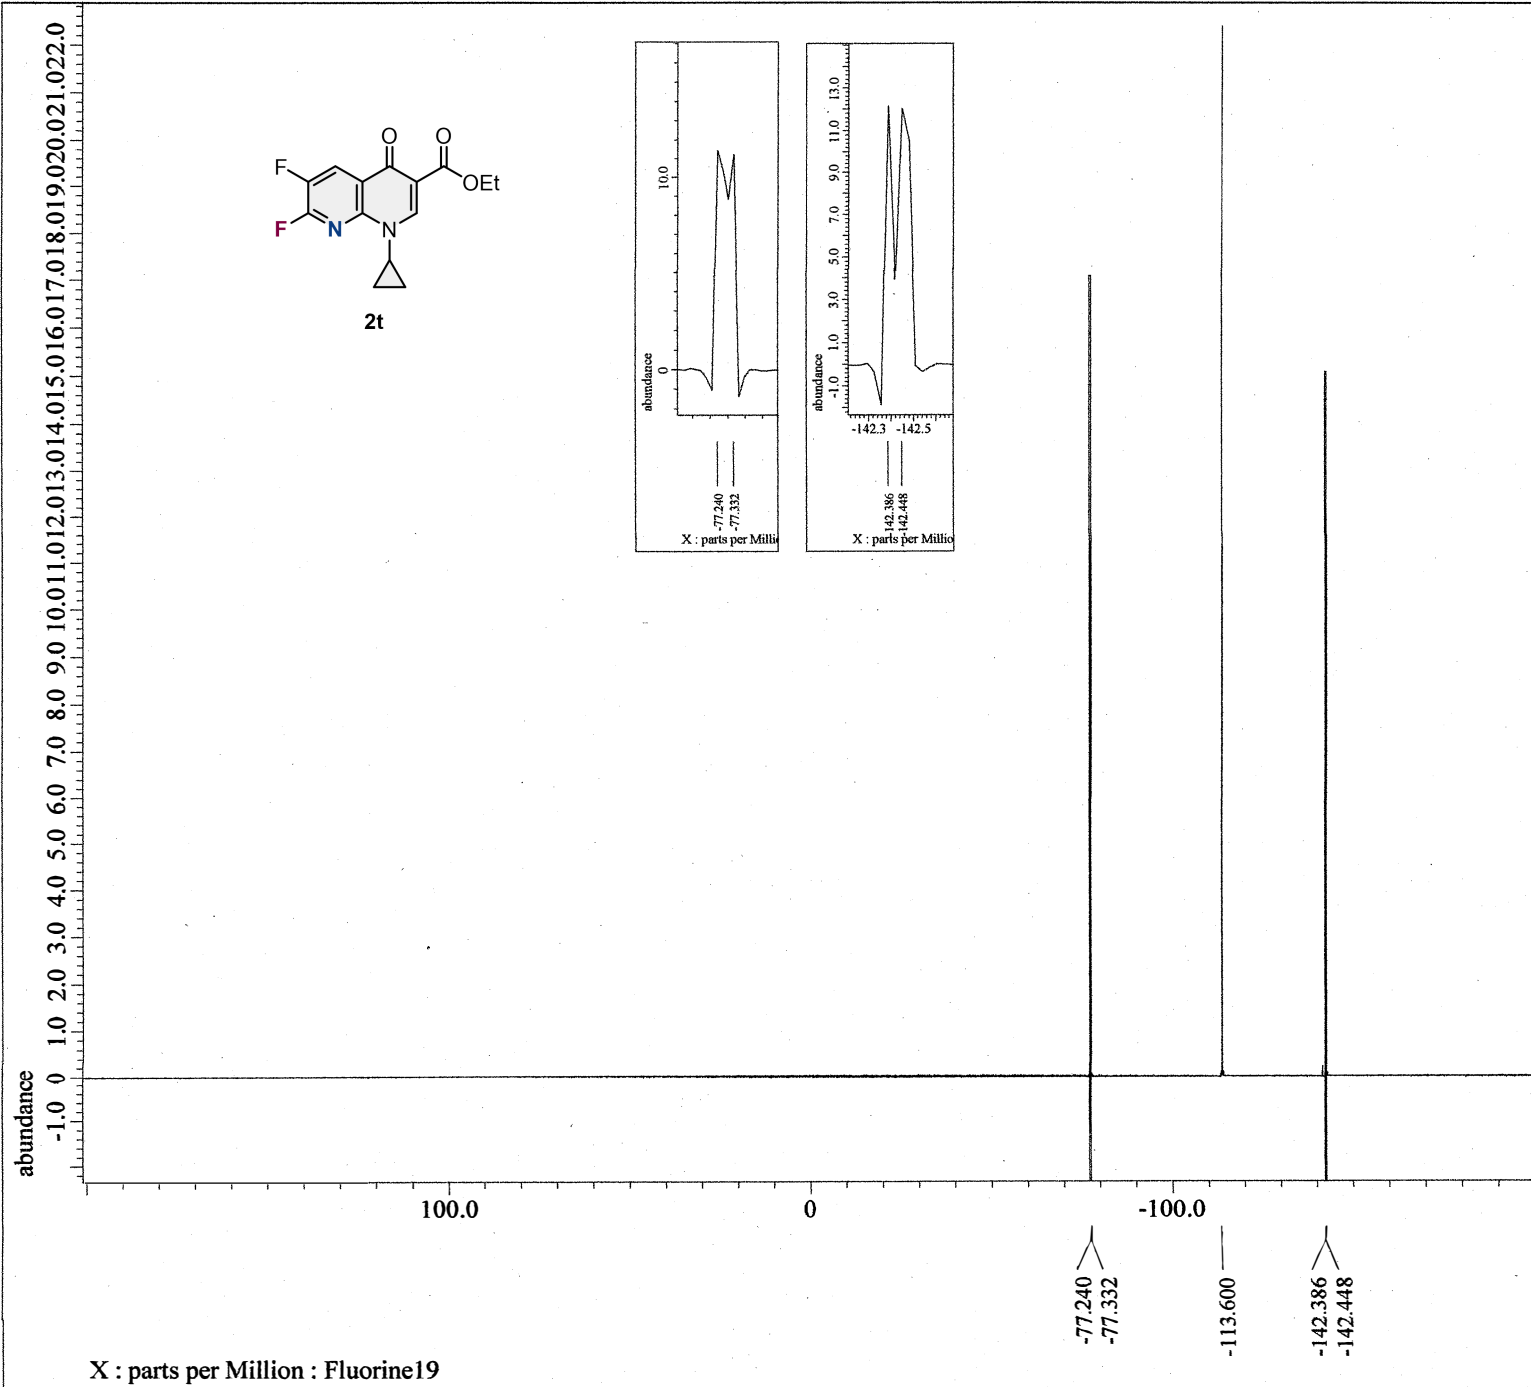

```

---- PROCESSING PARAMETERS ----
dc_balance( 0, FALSE )
sexp( 0.2[Hz], 0.0[s] )
trapezoid( 0[%], 0[%], 80[%], 100[%] )
zerofill( 1, TRUE )
blip( 16, 64, 30 )
fft( 1, TRUE, TRUE )
machinephase
ppm
Derived from: MKN231-pure-int single pulse-1-1

```

```

Filename      = MKN231-pure-int_single_pul
Author       = element
Experiment    = single_pulse.jxp
Sample Id    = MKN231-pure-int
Solvent      = CHLOROFORM-D
Actual Start Time = 22-JAN-2024 16:22:18
Revision Time  = 15-JUN-2024 22:17:46

Comment      = single pulse
Data Format   = 1D COMPLEX
Dim Size     = 13107
X_Domain     = Fluori
Dim Title    = Fluorine19
Dim Units    = [ppm]
Dimensions   = X
Site         = JNM-ECS400
Spectrometer = DELTA2_NMR

Field Strength = 9.37221[T] (400[MHz])
X_Acq_Duration = 86.50752[ms]
X_Domain       = 19F
X_Freq        = 375.46772873[MHz]
X_Offset      = 0[ppm]
X_Points      = 16384
X_Prescans    = 1
X_Resolution  = 11.55968868[Hz]
X_Sweep       = 189.39393939[kHz]
X_Sweep_Clippped = 151.51515152[kHz]
Irr_Domain    = Fluorine19
Irr_Freq      = 375.46772873[MHz]
Irr_Offset    = 5[ppm]
Tri_Domain    = Fluorine19
Tri_Freq      = 375.46772873[MHz]
Tri_Offset    = 5[ppm]
Clipped       = FALSE
Scans         = 8
Total_Scans   = 8

Relaxation_Delay = 5[s]
Recvr_Gain       = 44
Temp_Get         = 19.5[dC]
X_90_Width      = 7.6[us]
X_Acq_Time      = 86.50752[ms]
X_Angle         = 45[deg]
X_Atn           = 2.5[dB]
X_Pulse         = 3.8[us]
Irr_Mode        = Off
Tri_Mode        = Off
Dante_Presat    = FALSE
Initial_Wait    = 1[s]
Repetition Time = 5.08650752[s]

```

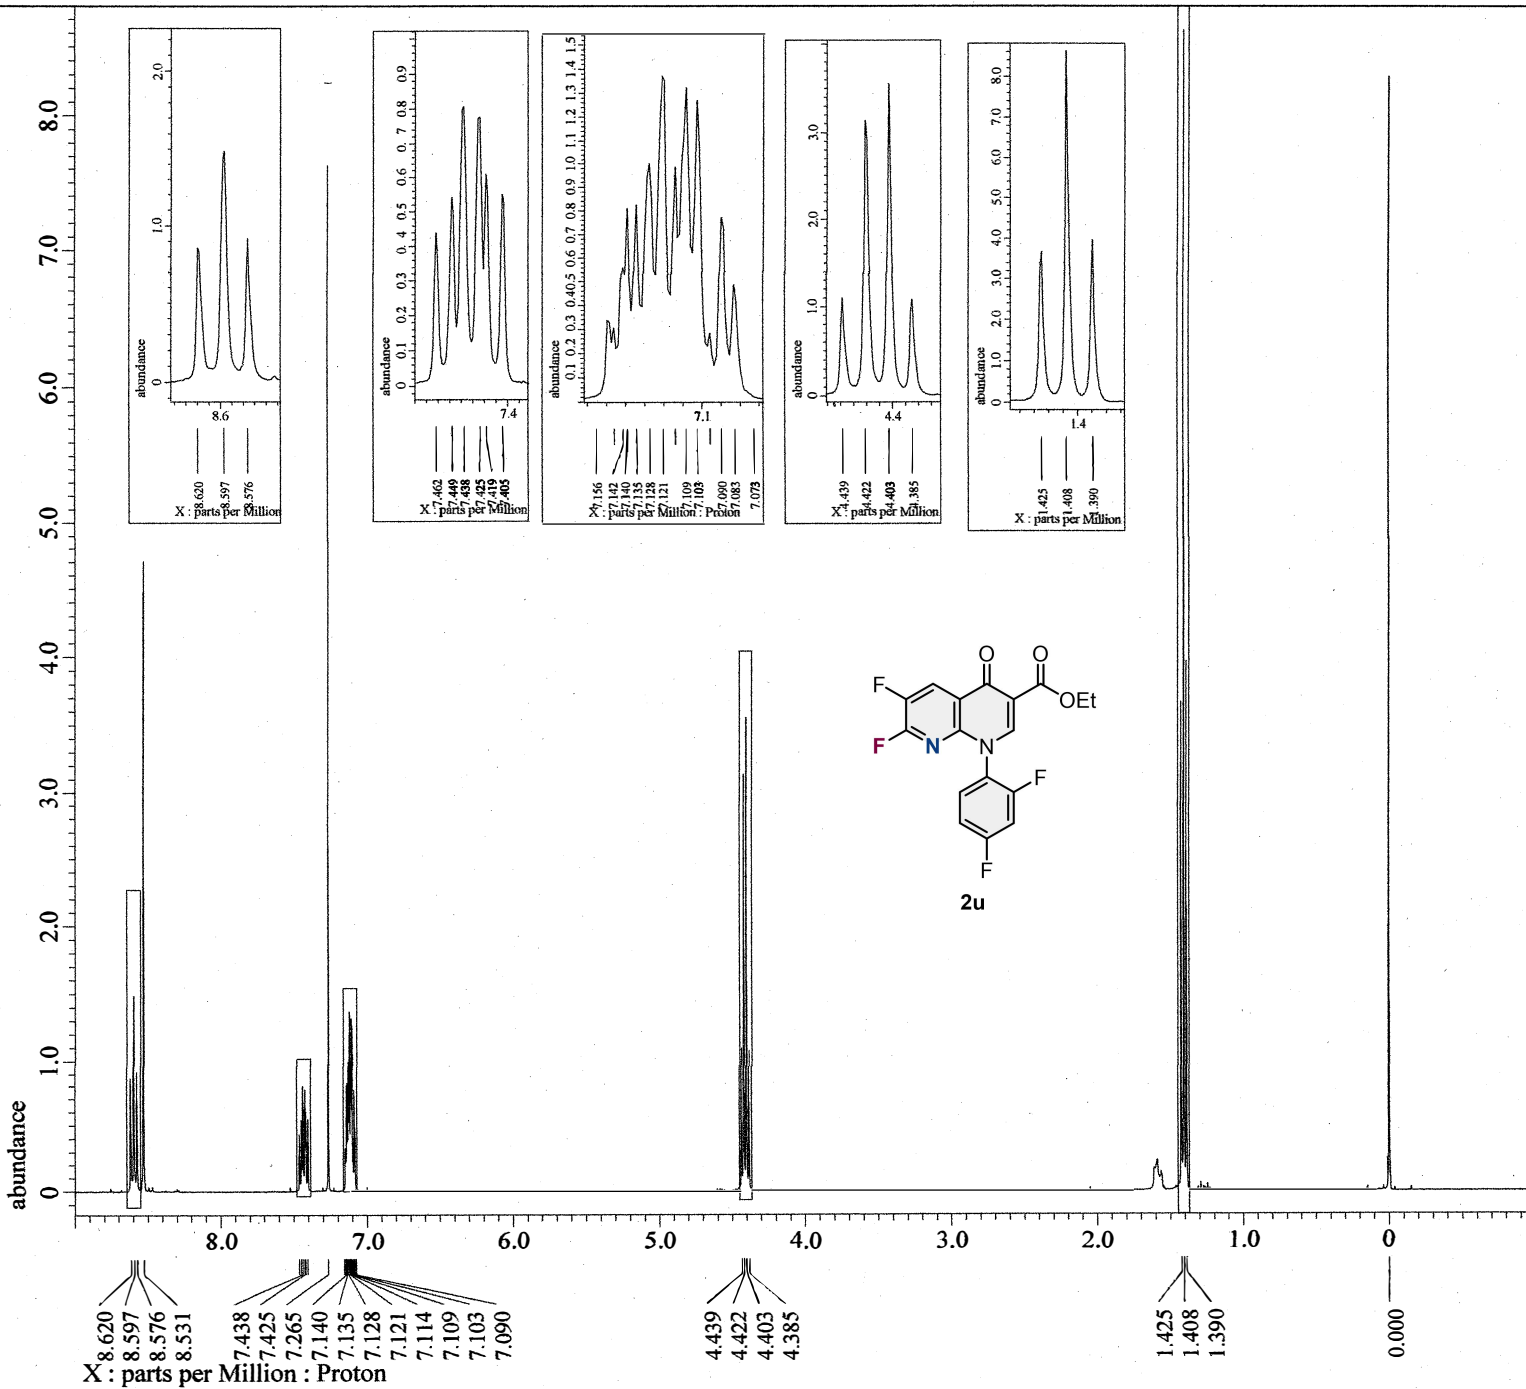

```

---- PROCESSING PARAMETERS ----
dc balance( 0, FALSE )
sexp( 0.2[Hz], 0.0[s] )
trapezoid( 0[%], 0[%], 80[%], 100[%] )
zerofill( 1, TRUE )
fft( 1, TRUE, TRUE )
machinephase
ppm

```

Derived from: MKN225-pure Proton-1-1.jdf

```

Filename      = MKN225-pure_Proton-1-2.jdf
Author       = element
Experiment   = proton.jxp
Sample Id    = MKN225-pure
Solvent      = CHLOROFORM-D
Actual_Start Time = 22-JAN-2024 16:29:35
Revision_Time = 15-JUN-2024 19:46:44

```

```

Comment      = single pulse
Data Format   = 1D COMPLEX
Dim Size     = 13107
X_Domain     = Proton
Dim Title    = Proton
Dim Units    = [ppm]
Dimensions   = X
Site         = JNM-ECS400
Spectrometer = DELTA2_NMR

```

```

Field_Strength = 9.37221[T] (400[MHz])
X_Acq_Duration = 2.1889024[s]
X_Domain       = 1H
X_Freq         = 399.03472754[MHz]
X_Offset       = 5.0[ppm]
X_Points       = 16384
X_Prescans     = 1
X_Resolution   = 0.45684997[Hz]
X_Sweep        = 7.48502994[kHz]
X_Sweep_Clipped = 5.98802395[kHz]
Irr_Domain     = Proton
Irr_Freq       = 399.03472754[MHz]
Irr_Offset     = 5.0[ppm]
Tri_Domain     = Proton
Tri_Freq       = 399.03472754[MHz]
Tri_Offset     = 5.0[ppm]
Clipped        = FALSE
Scans          = 8
Total_Scans    = 8

```

```

Relaxation_Delay = 5[s]
Recvr_Gain       = 46
Temp_Get         = 19.3[dC]
X_90_Width      = 6.6[us]
X_Acq_Time       = 2.1889024[s]
X_Angle          = 45[deg]
X_Atn           = 1[dB]
X_Pulse         = 3.3[us]
Irr_Mode        = Off
Tri_Mode        = Off
DanTe_Presat    = FALSE
Initial_Wait     = 1[s]
Repetition_Time = 7.1889024[s]

```

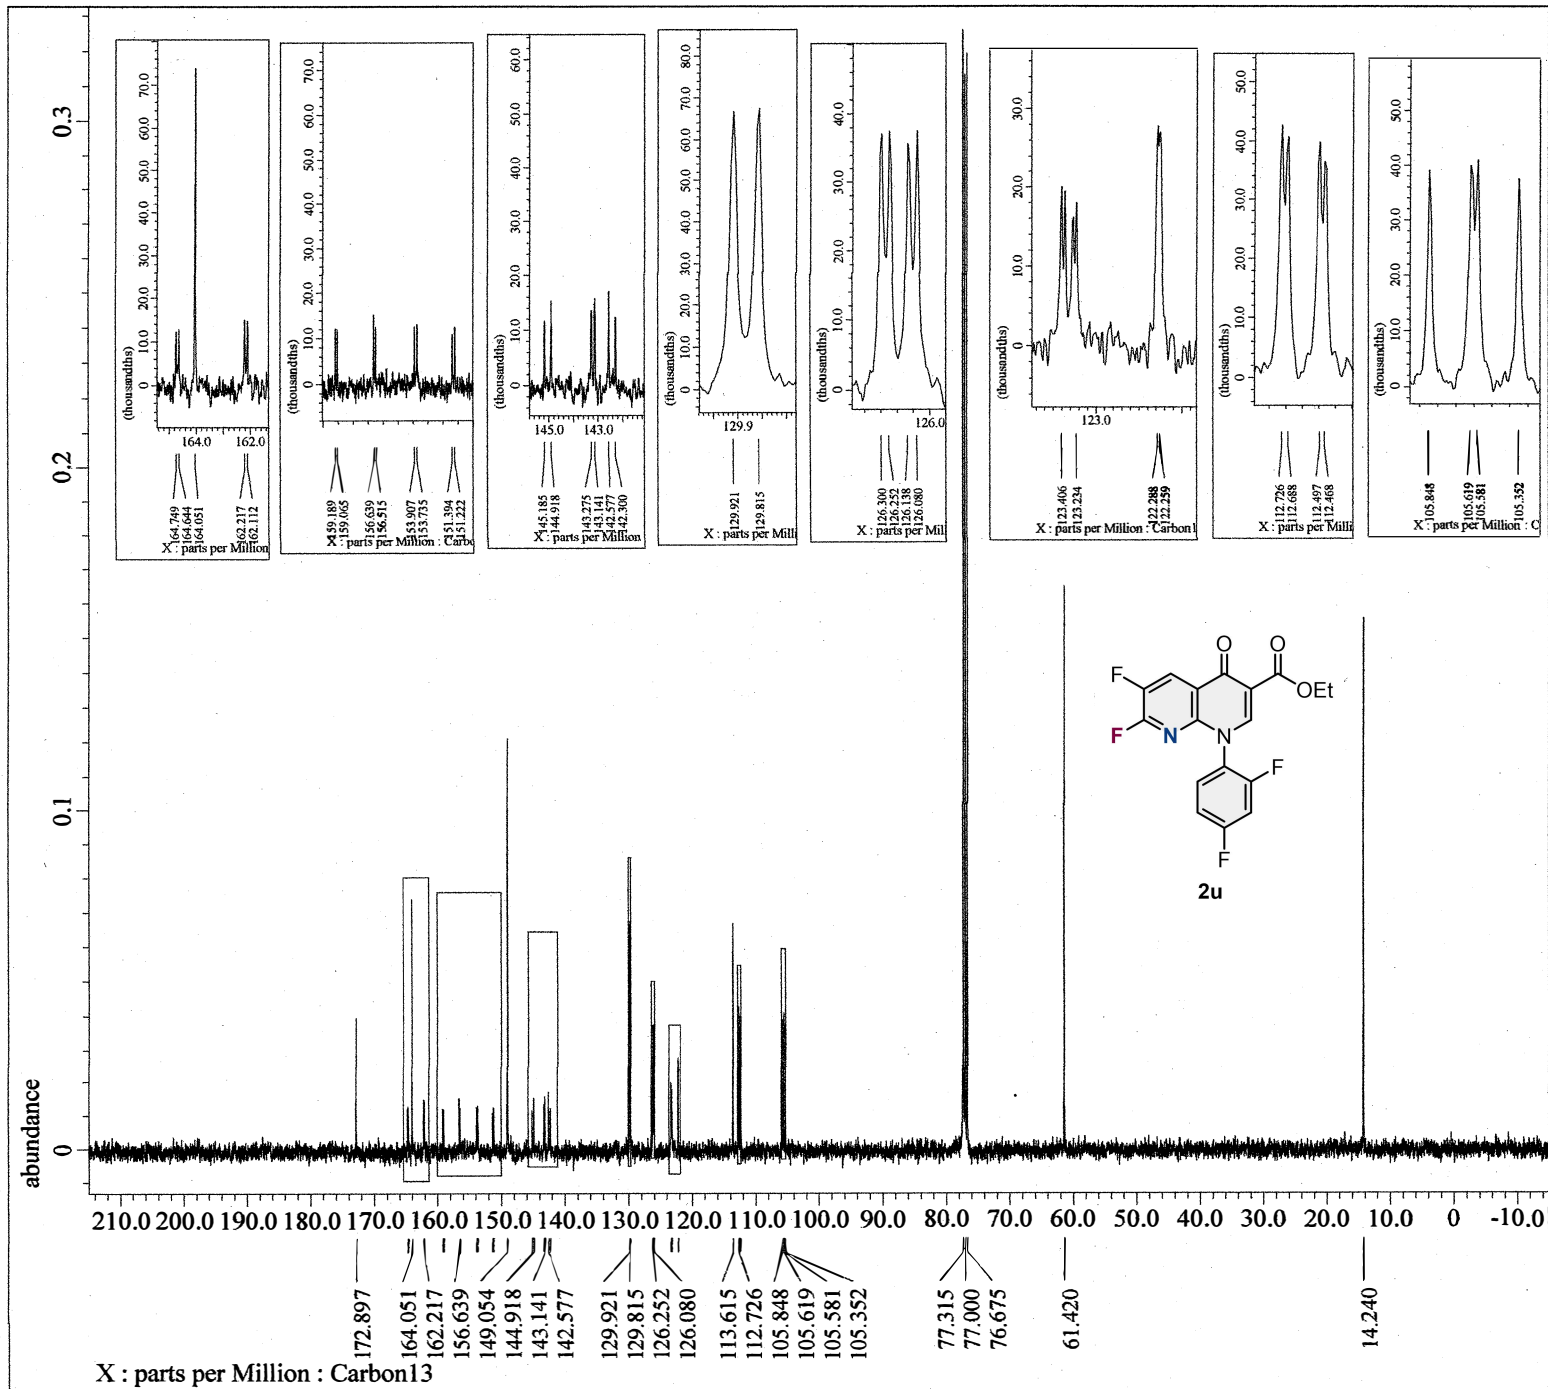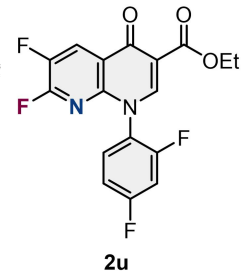

---- PROCESSING PARAMETERS ----  
 dc balance( 0, FALSE )  
 sexp( 2.0[Hz], 0.0[s] )  
 trapezoid( 0[%], 0[%], 80[%], 100[%] )  
 zerofill( 1, TRUE )  
 fft( 1, TRUE, TRUE )  
 machinephase  
 ppm

Derived from: MKN225-pure Carbon-1-1.jdf

Filename = MKN225-pure\_Carbon-1-4.jdf  
 Author = element  
 Experiment = carbon.jxp  
 Sample Id = MKN225-pure  
 Solvent = CHLOROFORM-D  
 Actual Start Time = 22-JAN-2024 17:11:04  
 Revision Time = 15-JUN-2024 21:09:39

Comment = single pulse decoupled gat  
 Data Format = 1D COMPLEX  
 Dim\_Size = 26214  
 X\_Domain = Carbon  
 Dim Title = Carbon13  
 Dim Units = [ppm]  
 Dimensions = X  
 Site = JNM-ECS400  
 Spectrometer = DELTA2\_NMR

Field\_Strength = 9.37221[T] (400[MHz])  
 X\_Acq\_Duration = 1.04333312[s]  
 X\_Domain = 13C  
 X\_Freq = 100.33735165[MHz]  
 X\_Offset = 100.0[ppm]  
 X\_Points = 32768  
 X\_Prescans = 4  
 X\_Resolution = 0.95846665[Hz]  
 X\_Sweep = 31.40703518[kHz]  
 X\_Sweep\_Clipped = 25.12562814[kHz]  
 Irr\_Domain = Proton  
 Irr\_Freq = 399.03472754[MHz]  
 Irr\_Offset = 5.0[ppm]  
 Clipped = FALSE  
 Scans = 256  
 Total\_Scans = 256

Relaxation\_Delay = 2[s]  
 Recvr Gain = 50  
 Temp\_Get = 19.9[dc]  
 X\_90\_Width = 10.9[us]  
 X\_Acq\_Time = 1.04333312[s]  
 X\_Angle = 30[deg]  
 X\_Atn = 5.4[db]  
 X\_Pulse = 3.63333333[us]  
 Irr\_Atn\_Dec = 25.823[db]  
 Irr\_Atn\_Noise = 25.823[db]  
 Irr\_Noise = WALTZ  
 Irr\_Pwidth = 0.115[ms]  
 Decoupling = TRUE  
 Initial\_Wait = 1[s]  
 Noe = TRUE  
 Noe\_Time = 2[s]  
 Repetition\_Time = 3.04333312[s]

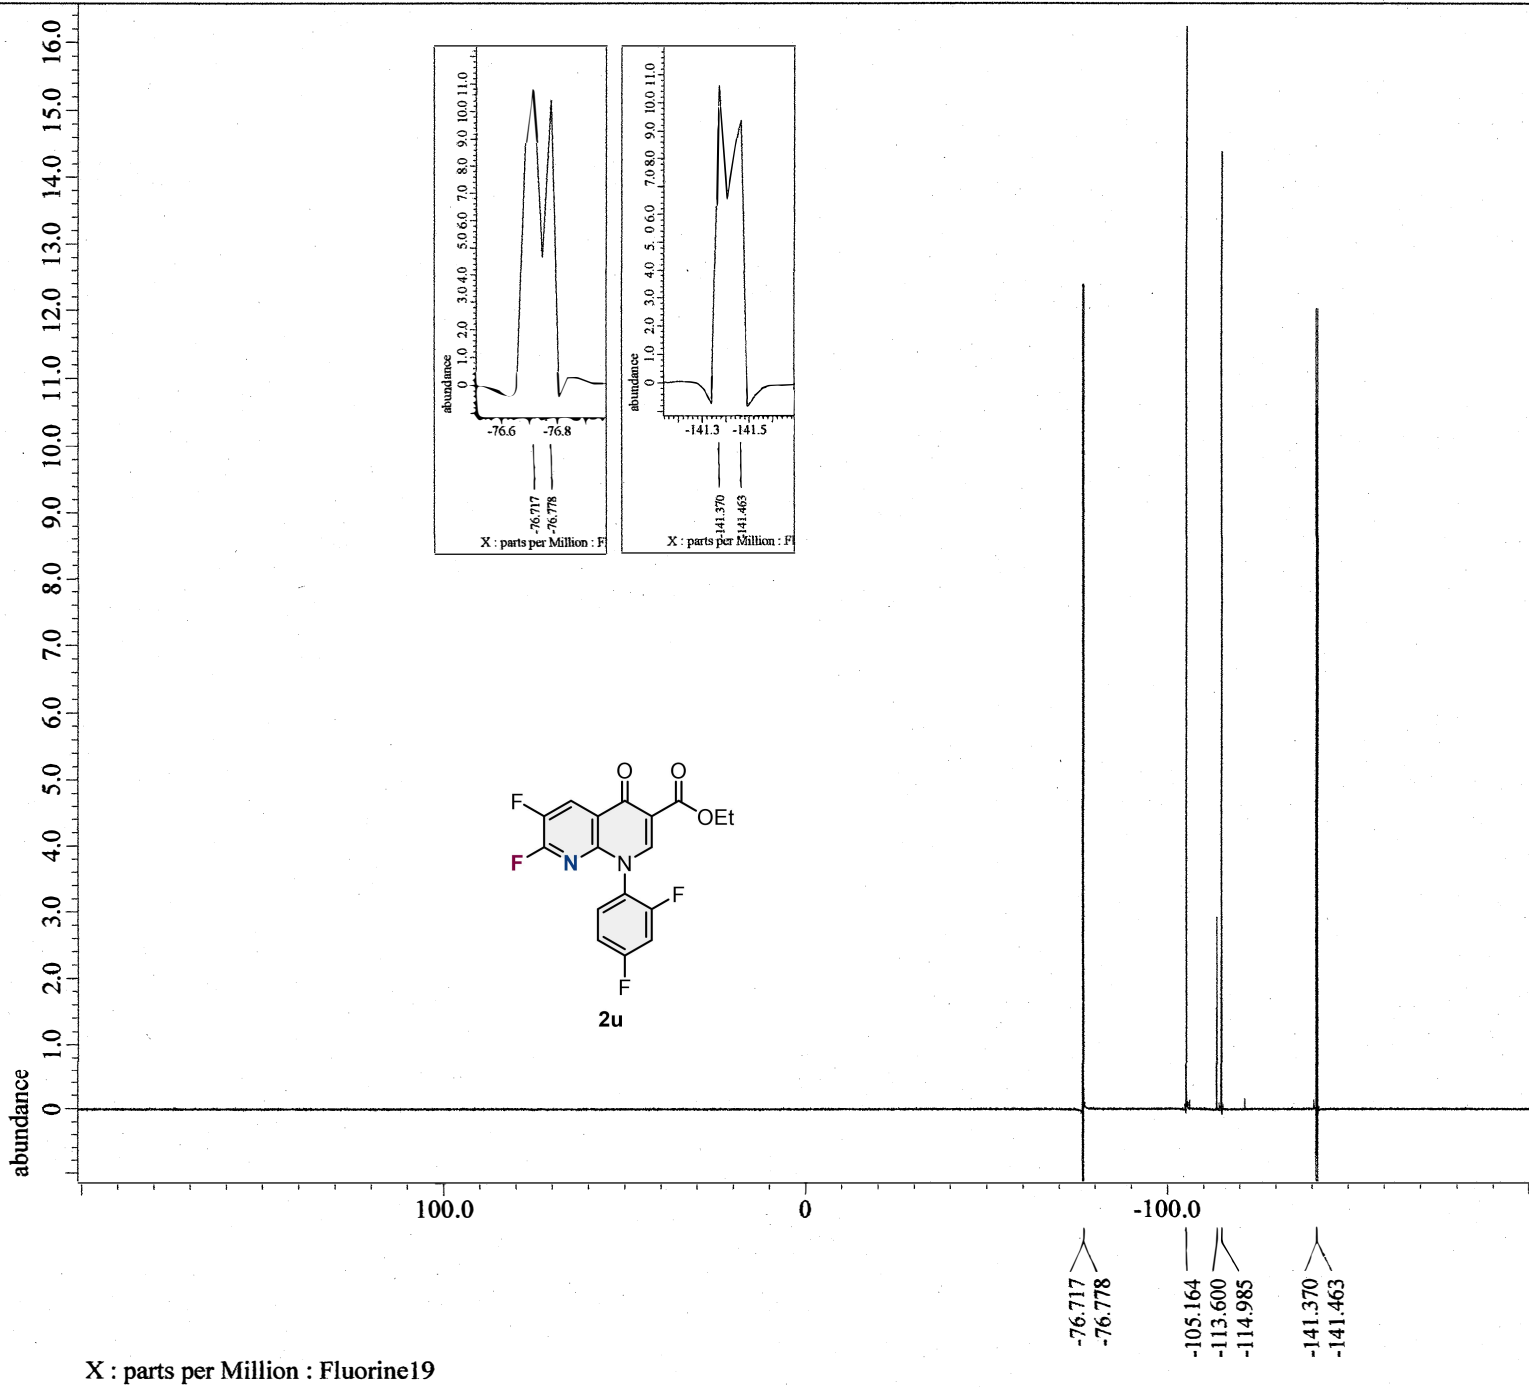

```

---- PROCESSING PARAMETERS ----
dc balance( 0, FALSE )
seXp( 0.2[Hz], 0.0[s] )
trapezoid( 0[&], 0[&], 80[&], 100[&] )
zerofill( 1, TRUE )
blip( 16, 64, 30 )
fft( 1, TRUE, TRUE )
machinephase
ppm

Derived from: MKN225-pure-int single pulse-1-1

```

```

Filename      = MKN225-pure-int_single_pul
Author       = element
Experiment    = single_pulse.jxp
Sample Id    = MKN225-pure-int
Solvent      = CHLOROFORM-D
Actual_Start Time = 22-JAN-2024 16:16:08
Revision_Time = 15-JUN-2024 20:53:02

Comment      = single pulse
Data Format   = 1D COMPLEX
Dim Size     = 13107
X Domain     = Fluori
Dim Title    = Fluorine19
Dim Units    = [ppm]
Dimensions   = X
Site         = JNM-ECS400
Spectrometer = DELTA2_NMR

Field_Strength = 9.37221[T] (400[MHz])
X_Acq_Duration = 86.50752[ms]
X_Domain       = 19F
X_Freq        = 375.46772873[MHz]
X_Offset      = 0[ppm]
X_Points      = 16384
X_Prescans    = 1
X_Resolution  = 11.55968868[Hz]
X_Sweep       = 189.39393939[kHz]
X_Sweep_Clippped = 151.51515152[kHz]
Irr_Domain    = Fluorine19
Irr_Freq     = 375.46772873[MHz]
Irr_Offset    = 5[ppm]
Tri_Domain    = Fluorine19
Tri_Freq     = 375.46772873[MHz]
Tri_Offset    = 5[ppm]
Clipped      = FALSE
Scans        = 8
Total_Scans  = 8

Relaxation_Delay = 5[s]
Recvr_Gain       = 42
Temp_Get        = 19.6[dc]
X_90_Width     = 7.6[us]
X_Acq_Time     = 86.50752[ms]
X_Angle        = 45[deg]
X_Atn          = 2.5[db]
X_Pulse        = 3.8[us]
Irr_Mode       = Off
Tri_Mode       = Off
DanTe_Presat   = FALSE
Initial_Wait   = 1[s]
Repetition Time = 5.08650752[s]

```



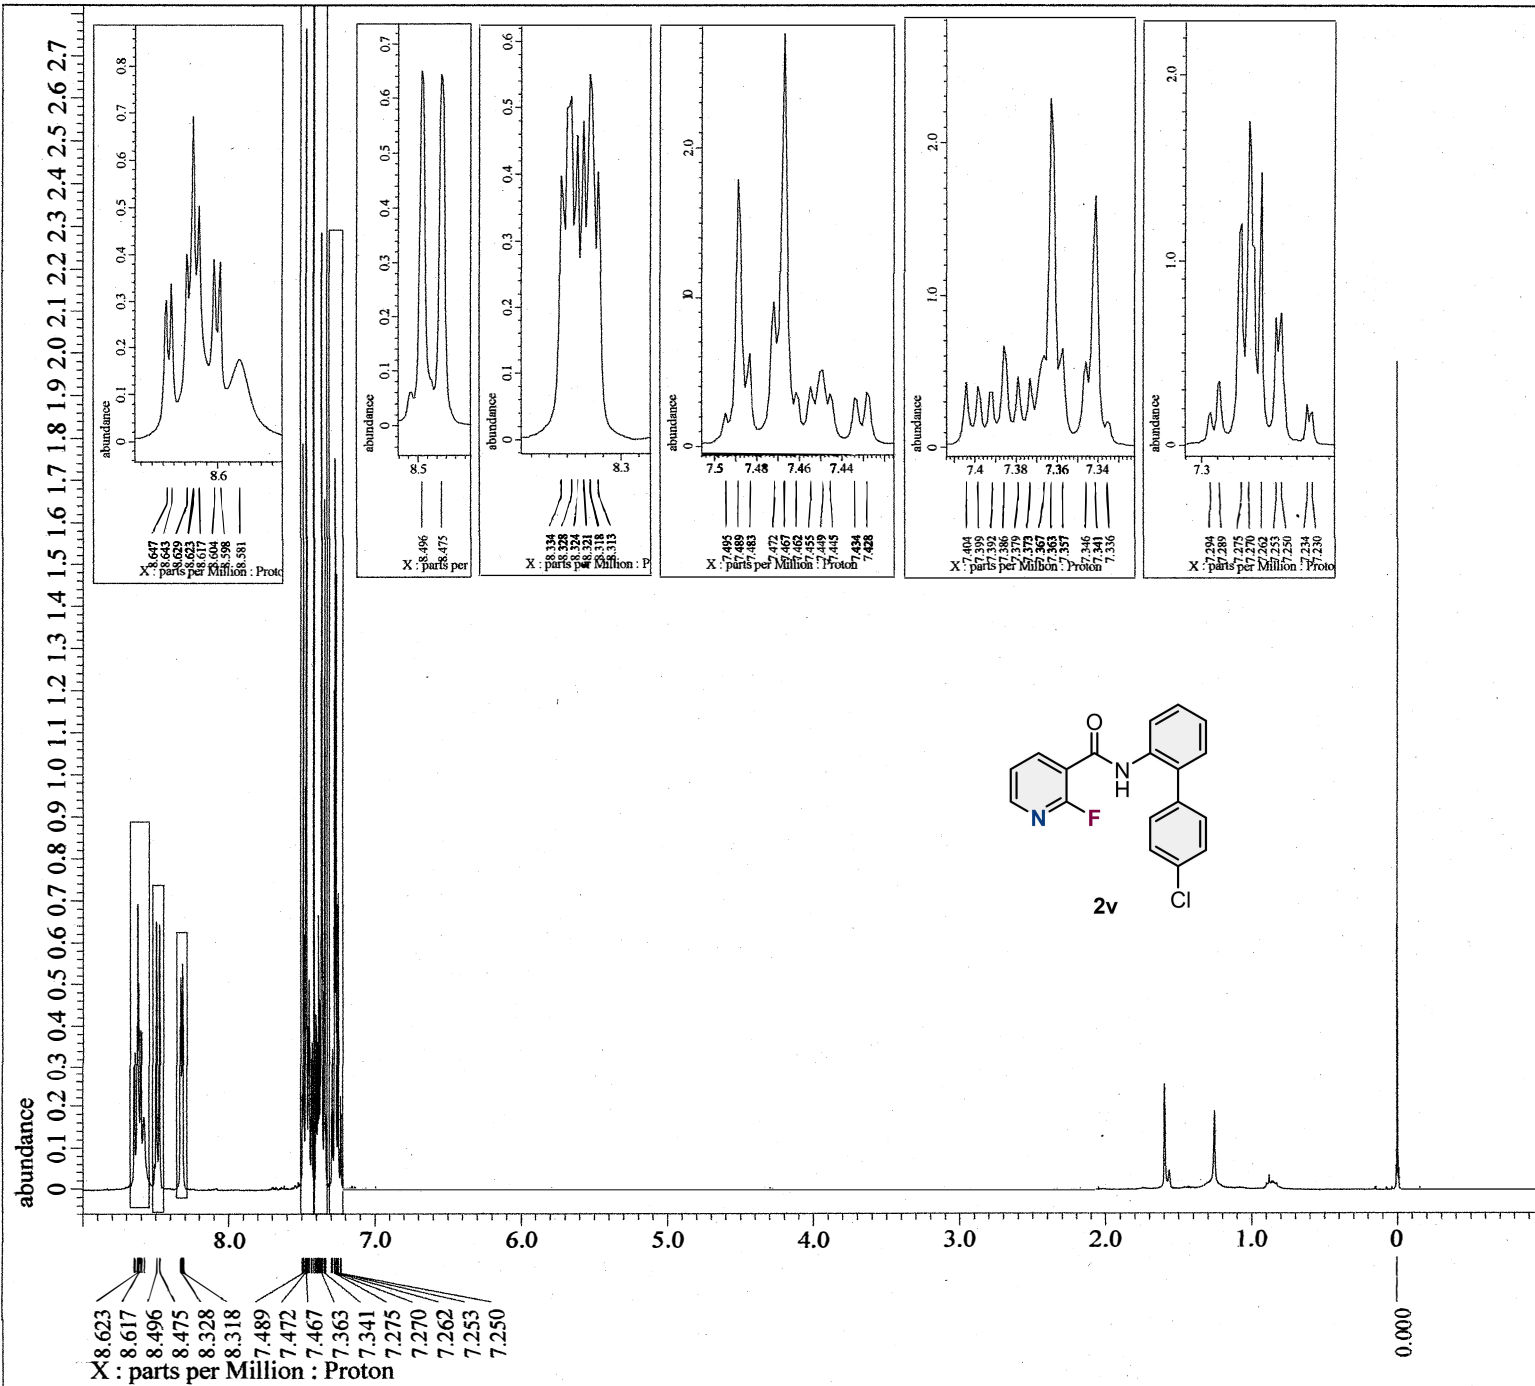

```

---- PROCESSING PARAMETERS ----
sexp( 0.2[Hz], 0.0[s] )
trapezoid( 0[%], 0[%], 80[%], 100[%] )
zerofill( 1, TRUE )
fft( 1, TRUE, TRUE )
machinephase
ppm

Derived from: MKN219-pure Proton-1-1.jdf

Filename = MKN219-pure Proton-1-1-8
Author = element
Experiment = proton_auto.jxp
Sample Id = MKN219-pure
Solvent = CHLOROFORM-D
Actual_Start Time = 23-JAN-2024 12:32:19
Revision_Time = 15-JUN-2024 18:20:55

Comment = single_pulse
Data_Format = 1D_COMPLEX
Dim_Size = 13107
X_Domain = Proton
Dim Title = Proton
Dim Units = [ppm]
Dimensions = X
Spectrometer = DELTA2_NMR

Field_Strength = 9.298215[T] (400[MHz])
X_Acq_Duration = 2.20725248[s]
X_Domain = Proton
X_Freq = 395.88430144[MHz]
X_Offset = 5[ppm]
X_Points = 16384
X_Prescans = 1
X_Resolution = 0.45305193[Hz]
X_Sweep = 7.42280285[kHz]
X_Sweep_Clippped = 5.93824228[kHz]
Irr_Domain = Proton
Irr_Freq = 395.88430144[MHz]
Irr_Offset = 5[ppm]
Tri_Domain = Proton
Tri_Freq = 395.88430144[MHz]
Tri_Offset = 5[ppm]
Blanking = 2.0[us]
Clipped = FALSE
Scans = 8
Total_Scans = 8

Relaxation_Delay = 5[s]
Recvr Gain = 56
Temp_Get = 18.8[dc]
X_90_Width = 6.34[us]
X_Acq_Time = 2.20725248[s]
X_Angle = 45[deg]
X_Atn = 5[dB]
X_Pulse = 3.17[us]
Irr_Mode = Off
Tri_Mode = Off
Dante_Loop = 500
Dante_Presat = FALSE
Decimation_Rate = 0
Initial_Wait = 1[s]
Phase = {0, 90, 270, 180, 180,

```

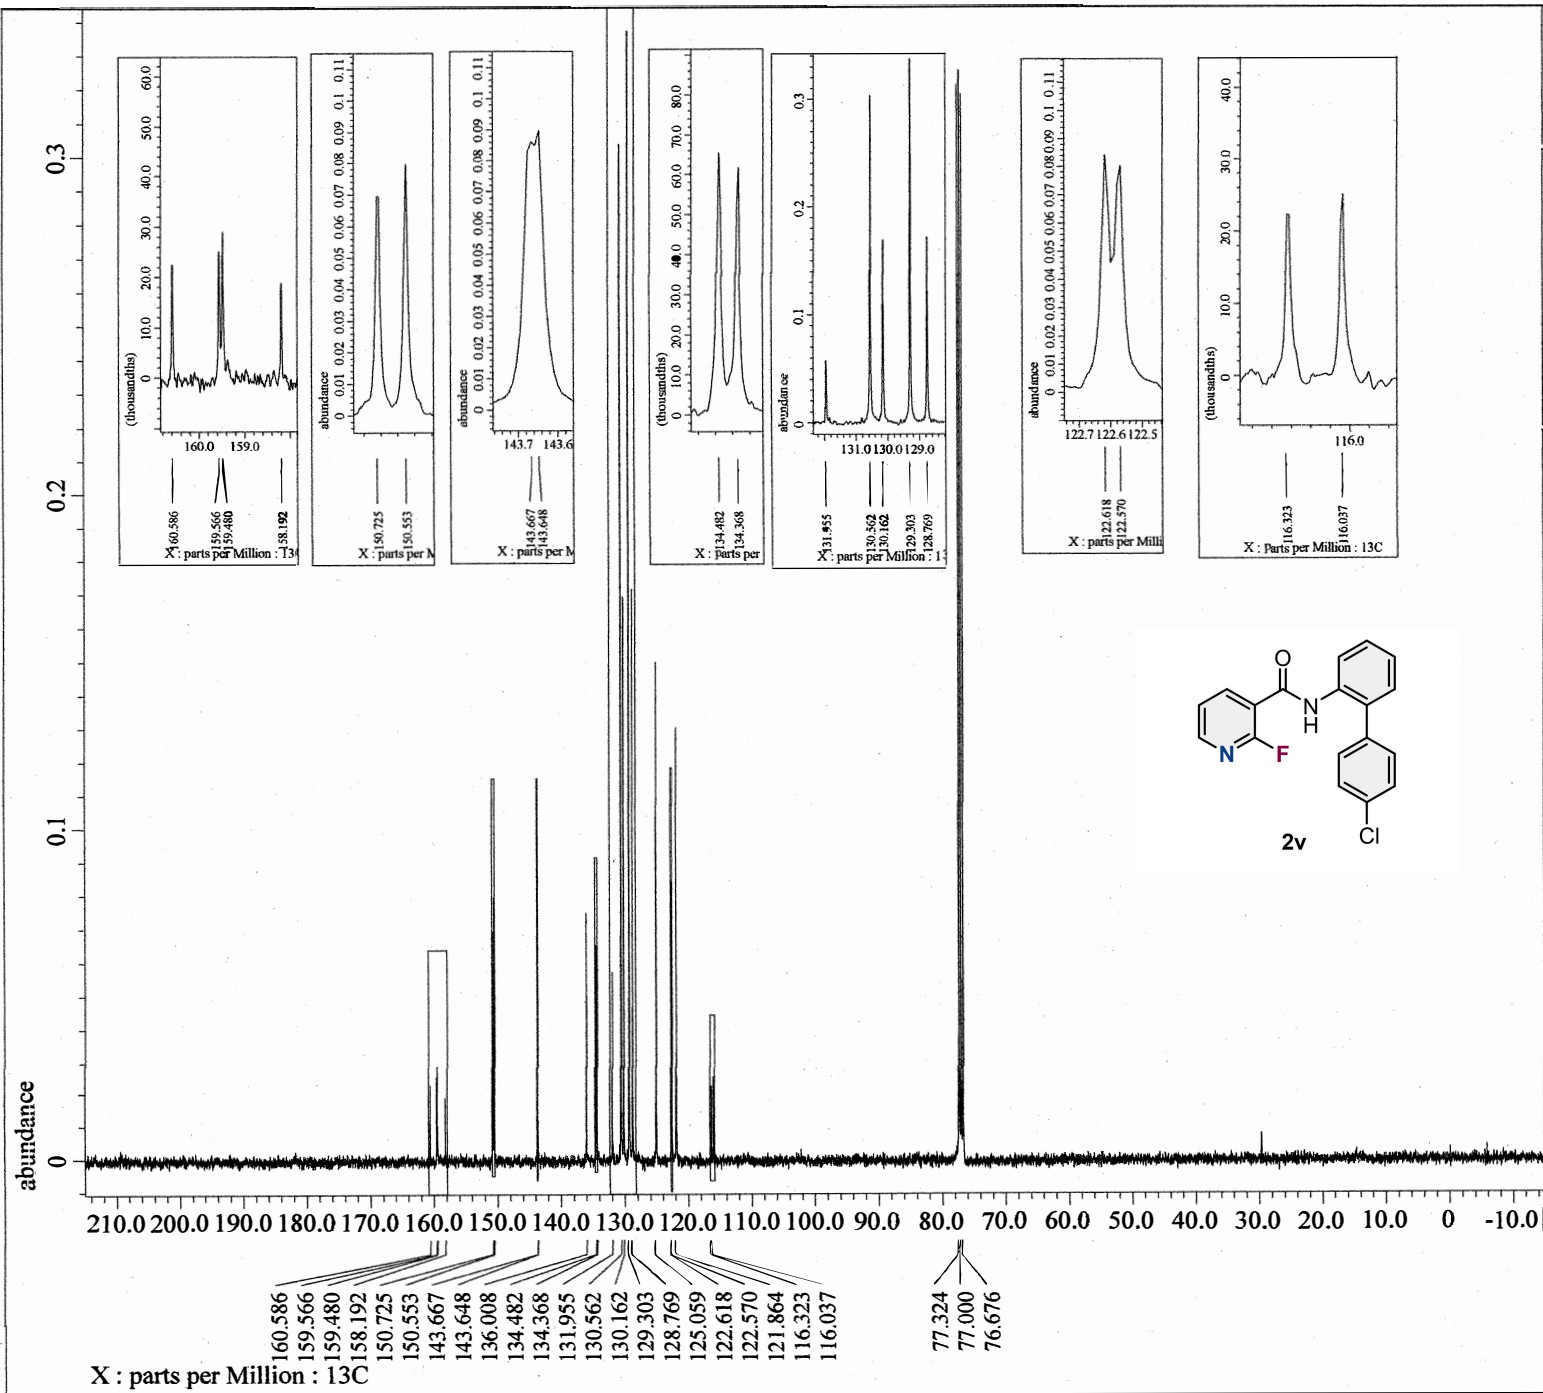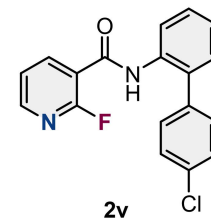

---- PROCESSING PARAMETERS ----  
 dc balance( 0, FALSE )  
 seXP( 2.0[Hz], 0.0[s] )  
 trapezoid3( 0[%], 80[%], 100[%] )  
 zerofill( 1, TRUE )  
 fft( 1, TRUE, TRUE )  
 machinephase  
 ppm

Derived from: MKN219-pure Carbon-1.jdf

Filename = MKN219-pure\_Carbon-2.jdf  
 Author = element  
 Experiment = single\_pulse\_dec  
 Sample Id = 1  
 Solvent = CHLOROFORM-D  
 Actual\_Start Time = 23-JAN-2024 19:20:17  
 Revision\_Time = 15-JUN-2024 18:49:15

Comment = single pulse decoupled gat  
 Data Format = 1D COMPLEX  
 Dim\_Size = 26214  
 X\_Domain = 13C  
 Dim Title = 13C  
 Dim Units = [ppm]  
 Dimensions = X  
 Site = ECS 400  
 Spectrometer = JNM-ECS400

Field\_Strength = 9.20197068[T] (390[MHz])  
 X\_Acq\_Duration = 1.06430464[s]  
 X\_Domain = 13C  
 X\_Freq = 98.51479726[MHz]  
 X\_Offset = 100[ppm]  
 X\_Points = 32768  
 X\_Prescans = 4  
 X\_Resolution = 0.93958061[Hz]  
 X\_Sweep = 30.78817734[kHz]  
 Irr\_Domain = 1H  
 Irr\_Freq = 391.78655441[MHz]  
 Irr\_Offset = 5[ppm]  
 Clipped = FALSE  
 Scans = 509  
 Total\_Scans = 509

Relaxation\_Delay = 2[s]  
 Recvr\_Gain = 50  
 Temp\_Get = 19.9[dC]  
 X\_90\_Width = 9.46[us]  
 X\_Acq\_Time = 1.06430464[s]  
 X\_Angle = 30[deg]  
 X\_Atn = 4.9[dB]  
 X\_Pulse = 3.15333333[us]  
 Irr\_Atn\_Dec = 22.45[dB]  
 Irr\_Atn\_NoE = 22.45[dB]  
 Irr\_Noise = WALTZ  
 Decoupling = TRUE  
 Initial\_Wait = 1[s]  
 Noe = TRUE  
 Noe\_Time = 2[s]  
 Repetition\_Time = 3.06430464[s]

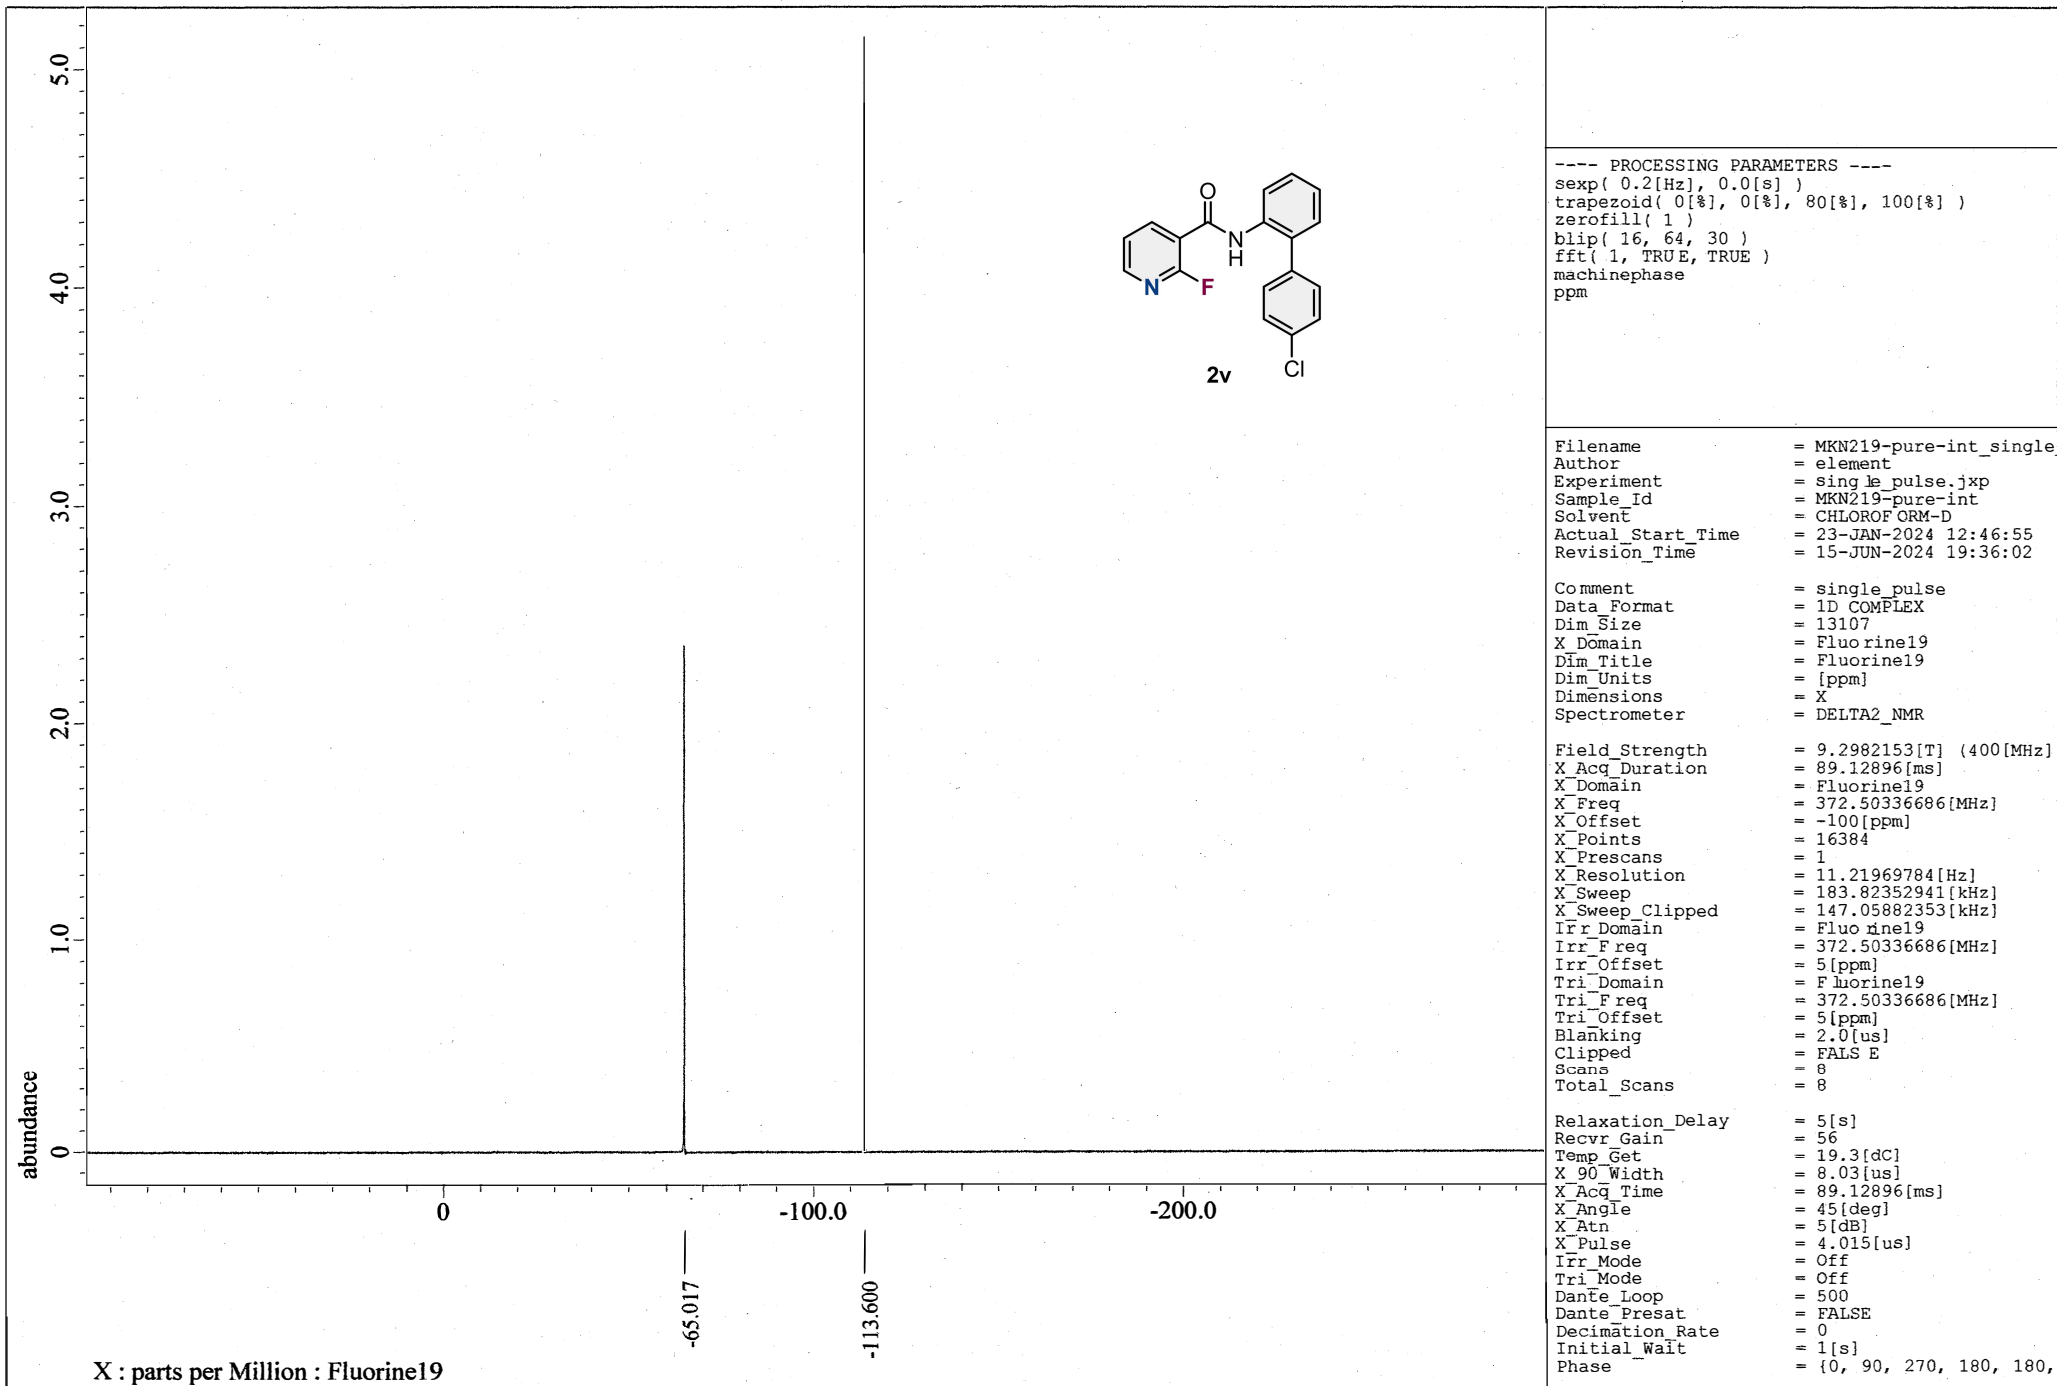

Supplement: d4gc06362g1.pdf [file d4gc06362g1.pdf]
